# Supplementary material for: Genome-wide identification, subcellular localization, and expression analysis of the phosphatidyl ethanolamine-binding protein family reveals the candidates involved in flowering and yield regulation of Tartary buckwheat (Fagopyrum tataricum)
Source: PeerJ. 2024 Mar 26;12:e17183. doi: 10.7717/peerj.17183 (PMC10979741; doi:10.7717/peerj.17183)
Supplement: Supplemental Information 4 [file peerj-12-17183-s004.xls]

## Sheet: Sheet1
ITEM TO CHECK	IMPORTANCE	CHECKLIST
EXPERIMENTAL DESIGN
Definition of experimental and control groups	E	Line 179
Number within each group	E	Line179
Assay carried out by core lab or investigator's lab?	D	Line 8
Acknowledgement of authors' contributions	D	Line 408
SAMPLE
Description	E	Line 179
Volume/mass of sample processed	D	Line 201
Microdissection or macrodissection	E	Line 201
Processing procedure	E	Line 179
If frozen - how and how quickly?	E	Line 189
If fixed - with what, how quickly?	E
Sample storage conditions and duration (especially for FFPE samples)	E	Line 189
NUCLEIC ACID EXTRACTION
Procedure and/or instrumentation	E	Line 190
Name of kit and details of any modifications	E	Line 191
Source of additional reagents used	D
Details of DNase or RNAse treatment	E	Line 193
Contamination assessment (DNA or RNA)	E	Line 192
Nucleic acid quantification	E	Line 192
Instrument and method	E	Line 192
Purity (A260/A280)	D
Yield	D
RNA integrity method/instrument	E	Line 192
RIN/RQI or Cq of 3' and 5' transcripts	E	Line 192
Electrophoresis traces	D
Inhibition testing (Cq dilutions, spike or other)	E	Line 199
REVERSE TRANSCRIPTION
Complete reaction conditions	E	Line 193
Amount of RNA and reaction volume	E	Line 193
Priming oligonucleotide (if using GSP) and concentration	E	Line 193
Reverse transcriptase and concentration	E	Line 193
Temperature and time	E	Line 193
Manufacturer of reagents and catalogue numbers	D
Cqs with and without RT	D*
Storage conditions of cDNA	D
qPCR TARGET INFORMATION
If multiplex, efficiency and LOD of each assay.	E	Line 196
Sequence accession number	E	Line 196
Location of amplicon	D
Amplicon length	E	Line 196
In silico specificity screen (BLAST, etc)	E	Line 196
Pseudogenes, retropseudogenes or other homologs?	D
Sequence alignment	D
Secondary structure analysis of amplicon	D
Location of each primer by exon or intron (if applicable)	E	Line 196
What splice variants are targeted?	E	Line 196
qPCR OLIGONUCLEOTIDES
Primer sequences	E	Line 186
RTPrimerDB Identification Number	D
Probe sequences	D**	Line 186
Location and identity of any modifications	E	Line 193
Manufacturer of oligonucleotides	D
Purification method	D
qPCR PROTOCOL
Complete reaction conditions	E	Line 198
Reaction volume and amount of cDNA/DNA	E	Line 198
Primer, (probe), Mg++ and dNTP concentrations	E	Line 198
Polymerase identity and concentration	E	Line 198
Buffer/kit identity and manufacturer	E	Line 198
Exact chemical constitution of the buffer	D
Additives (SYBR Green I, DMSO, etc.)	E	Line 198
Manufacturer of plates/tubes and catalog number	D
Complete thermocycling parameters	E	Line 198
Reaction setup (manual/robotic)	D	Line 198
Manufacturer of qPCR instrument	E	Line 198
qPCR VALIDATION
Evidence of optimisation (from gradients)	D
Specificity (gel, sequence, melt, or digest)	E	Line 198
For SYBR Green I, Cq of the NTC	E	Line 198
Standard curves with slope and y-intercept	E	Line 198
PCR efficiency calculated from slope	E	Line 198
Confidence interval for PCR efficiency or standard error	D
r2 of standard curve	E	Line 198
Linear dynamic range	E	Line 198
Cq variation at lower limit	E	Line 198
Confidence intervals throughout range	D
Evidence for limit of detection	E	Line 198
If multiplex, efficiency and LOD of each assay.	E	Line 198
DATA ANALYSIS
qPCR analysis program (source, version)	E	Line 203
Cq method determination	E	Line 203
Outlier identification and disposition	E	Line 203
Results of NTCs	E	Line 203
Justification of number and choice of reference genes	E	Line 203
Description of normalisation method	E	Line 203
Number and concordance of biological replicates	D	Line 199
Number and stage (RT or qPCR) of technical replicates	E	Line 199
Repeatability (intra-assay variation)	E	Line 199
Reproducibility (inter-assay variation, %CV)	D
Power analysis	D
Statistical methods for result significance	E	Line 203
Software (source, version)	E	Line 200
Cq or raw data submission using RDML	D
Table 1. MIQE checklist for authors, reviewers and editors. All essential information (E) must be submitted with the manuscript. Desirable
information (D) should be submitted if available. If using primers obtained from RTPrimerDB, information on qPCR target, oligonucleotides,
protocols and validation is available from that source.
*: Assessing the absence of DNA using a no RT assay is essential when first extracting RNA. Once the sample has been validated as
RDNA-free, inclusion of a no-RT control is desirable, but no longer essential.
**: Disclosure of the probe sequence is highly desirable and strongly encouraged. However, since not all commercial pre-designed assay
vendors provide this information, it cannot be an essential requirement. Use of such assays is advised against.
