# Supplementary material for: Genome-wide identification, subcellular localization, and expression analysis of the phosphatidyl ethanolamine-binding protein family reveals the candidates involved in flowering and yield regulation of Tartary buckwheat (Fagopyrum tataricum)
Source: PeerJ. 2024 Mar 26;12:e17183. doi: 10.7717/peerj.17183 (PMC10979741; doi:10.7717/peerj.17183)
Supplement: Supplemental Information 6 [file peerj-12-17183-s006.xlsx]

## Sheet: Ft-At
############### Parameters ###############
# MATCH_SCORE: 50
# MATCH_SIZE: 5
# GAP_PENALTY: -1
# OVERLAP_WINDOW: 5
# E_VALUE: 1e-05
# MAX GAPS: 25
############### Statistics ###############
# Number of collinear genes: 9131, Percentage: 15.41
# Number of all genes: 59255
##########################################
## Alignment 0: score=966.0 e_value=2.7e-60 N=21 At-Chr1&Ft-Ft1 plus
0- 0:	At-AT1G23290.1.TAIR10	Ft-FtPinG0000151500.01.T01	1e-90
0- 1:	At-AT1G23320.1.TAIR10	Ft-FtPinG0000153200.01.T01	3e-140
0- 2:	At-AT1G23330.1.TAIR10	Ft-FtPinG0000154600.01.T01	0
0- 3:	At-AT1G23400.1.TAIR10	Ft-FtPinG0000155600.01.T01	0
0- 4:	At-AT1G23420.1.TAIR10	Ft-FtPinG0000155700.01.T01	1e-54
0- 5:	At-AT1G23440.1.TAIR10	Ft-FtPinG0000156500.01.T01	7e-108
0- 6:	At-AT1G23450.1.TAIR10	Ft-FtPinG0000156700.01.T01	1e-97
0- 7:	At-AT1G23490.1.TAIR10	Ft-FtPinG0000158300.01.T02	3e-134
0- 8:	At-AT1G23530.1.TAIR10	Ft-FtPinG0000159100.01.T01	3e-11
0- 9:	At-AT1G23710.1.TAIR10	Ft-FtPinG0000159700.01.T01	1e-33
0- 10:	At-AT1G23740.1.TAIR10	Ft-FtPinG0000161000.01.T01	2e-176
0- 11:	At-AT1G23750.1.TAIR10	Ft-FtPinG0000161100.01.T01	2e-79
0- 12:	At-AT1G23760.1.TAIR10	Ft-FtPinG0000161300.01.T01	0
0- 13:	At-AT1G23800.1.TAIR10	Ft-FtPinG0000164400.01.T01	0
0- 14:	At-AT1G23820.1.TAIR10	Ft-FtPinG0000165100.01.T01	0
0- 15:	At-AT1G23870.1.TAIR10	Ft-FtPinG0000165500.01.T01	0
0- 16:	At-AT1G23880.1.TAIR10	Ft-FtPinG0000166300.01.T01	1e-176
0- 17:	At-AT1G23900.1.TAIR10	Ft-FtPinG0000166500.01.T02	0
0- 18:	At-AT1G24030.1.TAIR10	Ft-FtPinG0000169100.01.T01	0
0- 19:	At-AT1G24130.1.TAIR10	Ft-FtPinG0000171600.01.T01	7e-148
0- 20:	At-AT1G24160.1.TAIR10	Ft-FtPinG0000174500.01.T01	4e-25
## Alignment 1: score=962.0 e_value=1.2e-61 N=21 At-Chr1&Ft-Ft1 plus
1- 0:	At-AT1G52880.1.TAIR10	Ft-FtPinG0002560000.01.T01	2e-86
1- 1:	At-AT1G52890.1.TAIR10	Ft-FtPinG0002561000.01.T01	5e-108
1- 2:	At-AT1G52910.1.TAIR10	Ft-FtPinG0002562100.01.T01	2e-76
1- 3:	At-AT1G53000.1.TAIR10	Ft-FtPinG0002565600.01.T01	1e-163
1- 4:	At-AT1G53023.1.TAIR10	Ft-FtPinG0002566000.01.T02	6e-102
1- 5:	At-AT1G53035.1.TAIR10	Ft-FtPinG0002566400.01.T01	6e-64
1- 6:	At-AT1G53050.1.TAIR10	Ft-FtPinG0002566500.01.T01	0
1- 7:	At-AT1G53110.1.TAIR10	Ft-FtPinG0002567100.01.T01	2e-47
1- 8:	At-AT1G53163.1.TAIR10	Ft-FtPinG0009275100.01.T01	4e-12
1- 9:	At-AT1G53170.1.TAIR10	Ft-FtPinG0009275800.01.T01	1e-31
1- 10:	At-AT1G53190.1.TAIR10	Ft-FtPinG0009278300.01.T01	9e-57
1- 11:	At-AT1G53210.1.TAIR10	Ft-FtPinG0009279100.01.T01	0
1- 12:	At-AT1G53230.1.TAIR10	Ft-FtPinG0009279400.01.T01	3e-82
1- 13:	At-AT1G53240.1.TAIR10	Ft-FtPinG0009280000.01.T01	0
1- 14:	At-AT1G53250.1.TAIR10	Ft-FtPinG0009280300.01.T01	8e-64
1- 15:	At-AT1G53290.1.TAIR10	Ft-FtPinG0009281100.01.T01	6e-171
1- 16:	At-AT1G53300.1.TAIR10	Ft-FtPinG0008626900.01.T02	0
1- 17:	At-AT1G53310.1.TAIR10	Ft-FtPinG0008627600.01.T01	0
1- 18:	At-AT1G53380.1.TAIR10	Ft-FtPinG0008624500.01.T01	2e-162
1- 19:	At-AT1G53500.1.TAIR10	Ft-FtPinG0001873900.01.T01	0
1- 20:	At-AT1G53510.1.TAIR10	Ft-FtPinG0001873100.01.T01	0
## Alignment 2: score=770.0 e_value=2.2e-45 N=17 At-Chr1&Ft-Ft1 plus
2- 0:	At-AT1G52890.1.TAIR10	Ft-FtPinG0005791100.01.T01	3e-103
2- 1:	At-AT1G52910.1.TAIR10	Ft-FtPinG0005791000.01.T01	1e-80
2- 2:	At-AT1G53023.1.TAIR10	Ft-FtPinG0005645300.01.T01	2e-98
2- 3:	At-AT1G53050.1.TAIR10	Ft-FtPinG0005644200.01.T01	0
2- 4:	At-AT1G53090.1.TAIR10	Ft-FtPinG0005644000.01.T01	0
2- 5:	At-AT1G53100.1.TAIR10	Ft-FtPinG0005643700.01.T01	0
2- 6:	At-AT1G53110.1.TAIR10	Ft-FtPinG0005643400.01.T01	1e-41
2- 7:	At-AT1G53130.1.TAIR10	Ft-FtPinG0005643100.01.T01	1e-38
2- 8:	At-AT1G53163.1.TAIR10	Ft-FtPinG0005642200.01.T01	5e-16
2- 9:	At-AT1G53165.3.TAIR10	Ft-FtPinG0005640800.01.T01	0
2- 10:	At-AT1G53190.1.TAIR10	Ft-FtPinG0005637800.01.T01	1e-52
2- 11:	At-AT1G53210.1.TAIR10	Ft-FtPinG0005637000.01.T01	0
2- 12:	At-AT1G53300.1.TAIR10	Ft-FtPinG0005636200.01.T01	0
2- 13:	At-AT1G53320.1.TAIR10	Ft-FtPinG0005634100.01.T01	2e-167
2- 14:	At-AT1G53330.1.TAIR10	Ft-FtPinG0005633200.01.T01	6e-148
2- 15:	At-AT1G53500.1.TAIR10	Ft-FtPinG0005631800.01.T01	0
2- 16:	At-AT1G53510.1.TAIR10	Ft-FtPinG0005630300.01.T01	0
## Alignment 3: score=742.0 e_value=2.4e-40 N=16 At-Chr1&Ft-Ft1 plus
3- 0:	At-AT1G67360.1.TAIR10	Ft-FtPinG0000130800.01.T01	1e-56
3- 1:	At-AT1G67410.1.TAIR10	Ft-FtPinG0000132200.01.T01	0
3- 2:	At-AT1G67440.1.TAIR10	Ft-FtPinG0000132700.01.T01	0
3- 3:	At-AT1G67530.1.TAIR10	Ft-FtPinG0000133900.01.T01	0
3- 4:	At-AT1G67540.2.TAIR10	Ft-FtPinG0000134200.01.T01	6e-13
3- 5:	At-AT1G67560.1.TAIR10	Ft-FtPinG0000134700.01.T01	0
3- 6:	At-AT1G67580.1.TAIR10	Ft-FtPinG0000135000.01.T01	0
3- 7:	At-AT1G67590.1.TAIR10	Ft-FtPinG0000135200.01.T01	3e-121
3- 8:	At-AT1G67650.1.TAIR10	Ft-FtPinG0000136200.01.T01	0
3- 9:	At-AT1G67730.1.TAIR10	Ft-FtPinG0000141100.01.T01	4e-31
3- 10:	At-AT1G67790.1.TAIR10	Ft-FtPinG0000145000.01.T01	2e-14
3- 11:	At-AT1G67800.2.TAIR10	Ft-FtPinG0000147400.01.T01	0
3- 12:	At-AT1G67810.1.TAIR10	Ft-FtPinG0000149300.01.T01	5e-56
3- 13:	At-AT1G67830.1.TAIR10	Ft-FtPinG0000149700.01.T02	1e-140
3- 14:	At-AT1G67880.1.TAIR10	Ft-FtPinG0000150400.01.T01	0
3- 15:	At-AT1G67900.1.TAIR10	Ft-FtPinG0000150500.01.T01	0
## Alignment 4: score=645.0 e_value=3.3e-36 N=15 At-Chr1&Ft-Ft1 plus
4- 0:	At-AT1G19300.1.TAIR10	Ft-FtPinG0000034500.01.T01	1e-178
4- 1:	At-AT1G19330.3.TAIR10	Ft-FtPinG0000033900.01.T01	4e-92
4- 2:	At-AT1G19350.3.TAIR10	Ft-FtPinG0000033400.01.T01	2e-97
4- 3:	At-AT1G19360.1.TAIR10	Ft-FtPinG0000032100.01.T01	0
4- 4:	At-AT1G19400.1.TAIR10	Ft-FtPinG0000024700.01.T01	2e-110
4- 5:	At-AT1G19430.1.TAIR10	Ft-FtPinG0000023900.01.T01	0
4- 6:	At-AT1G19450.1.TAIR10	Ft-FtPinG0000020700.01.T01	0
4- 7:	At-AT1G19510.1.TAIR10	Ft-FtPinG0000020100.01.T01	2e-26
4- 8:	At-AT1G19600.1.TAIR10	Ft-FtPinG0006543100.01.T01	0
4- 9:	At-AT1G19640.1.TAIR10	Ft-FtPinG0006544400.01.T01	5e-60
4- 10:	At-AT1G19660.1.TAIR10	Ft-FtPinG0006545800.01.T01	2e-140
4- 11:	At-AT1G19700.1.TAIR10	Ft-FtPinG0006546400.01.T01	3e-78
4- 12:	At-AT1G19740.1.TAIR10	Ft-FtPinG0006547100.01.T01	7e-117
4- 13:	At-AT1G19790.1.TAIR10	Ft-FtPinG0006548400.01.T01	4e-56
4- 14:	At-AT1G19900.1.TAIR10	Ft-FtPinG0006549800.01.T01	0
## Alignment 5: score=580.0 e_value=1.4e-30 N=13 At-Chr1&Ft-Ft1 plus
5- 0:	At-AT1G06990.1.TAIR10	Ft-FtPinG0008701700.01.T01	2e-34
5- 1:	At-AT1G07150.1.TAIR10	Ft-FtPinG0008700300.01.T01	1e-102
5- 2:	At-AT1G07180.1.TAIR10	Ft-FtPinG0008699000.01.T01	0
5- 3:	At-AT1G07220.1.TAIR10	Ft-FtPinG0008697500.01.T01	3e-26
5- 4:	At-AT1G07230.1.TAIR10	Ft-FtPinG0008696500.01.T01	0
5- 5:	At-AT1G07280.1.TAIR10	Ft-FtPinG0008695600.01.T01	2e-143
5- 6:	At-AT1G07320.1.TAIR10	Ft-FtPinG0008694400.01.T01	3e-115
5- 7:	At-AT1G07350.1.TAIR10	Ft-FtPinG0008693100.01.T01	5e-54
5- 8:	At-AT1G07370.1.TAIR10	Ft-FtPinG0008693000.01.T01	3e-180
5- 9:	At-AT1G07380.1.TAIR10	Ft-FtPinG0008692500.01.T01	0
5- 10:	At-AT1G07440.1.TAIR10	Ft-FtPinG0008382900.01.T01	4e-108
5- 11:	At-AT1G07520.1.TAIR10	Ft-FtPinG0008615700.01.T01	2e-117
5- 12:	At-AT1G07540.1.TAIR10	Ft-FtPinG0008615500.01.T01	2e-107
## Alignment 6: score=548.0 e_value=3.7e-27 N=12 At-Chr1&Ft-Ft1 plus
6- 0:	At-AT1G19860.1.TAIR10	Ft-FtPinG0008442700.01.T01	2e-17
6- 1:	At-AT1G19970.1.TAIR10	Ft-FtPinG0002988200.01.T01	2e-164
6- 2:	At-AT1G19990.1.TAIR10	Ft-FtPinG0002989100.01.T01	3e-31
6- 3:	At-AT1G20030.2.TAIR10	Ft-FtPinG0002991900.01.T02	2e-92
6- 4:	At-AT1G20060.1.TAIR10	Ft-FtPinG0002993000.01.T01	4e-105
6- 5:	At-AT1G20080.1.TAIR10	Ft-FtPinG0002993600.01.T01	1e-52
6- 6:	At-AT1G20110.1.TAIR10	Ft-FtPinG0002996100.01.T01	2e-49
6- 7:	At-AT1G20150.1.TAIR10	Ft-FtPinG0002996600.01.T01	0
6- 8:	At-AT1G20190.1.TAIR10	Ft-FtPinG0002998000.01.T01	2e-140
6- 9:	At-AT1G20200.1.TAIR10	Ft-FtPinG0002998200.01.T01	0
6- 10:	At-AT1G20220.1.TAIR10	Ft-FtPinG0002998400.01.T01	8e-75
6- 11:	At-AT1G20340.1.TAIR10	Ft-FtPinG0006708000.01.T01	6e-70
## Alignment 7: score=545.0 e_value=2.3e-25 N=12 At-Chr1&Ft-Ft1 plus
7- 0:	At-AT1G75590.1.TAIR10	Ft-FtPinG0001397900.01.T01	9e-42
7- 1:	At-AT1G75660.1.TAIR10	Ft-FtPinG0001398900.01.T01	0
7- 2:	At-AT1G75700.1.TAIR10	Ft-FtPinG0001399900.01.T01	2e-89
7- 3:	At-AT1G75750.1.TAIR10	Ft-FtPinG0001400400.01.T01	4e-30
7- 4:	At-AT1G75760.1.TAIR10	Ft-FtPinG0001400600.01.T01	2e-170
7- 5:	At-AT1G75820.1.TAIR10	Ft-FtPinG0001401400.01.T01	0
7- 6:	At-AT1G75880.1.TAIR10	Ft-FtPinG0001402500.01.T01	2e-136
7- 7:	At-AT1G75990.1.TAIR10	Ft-FtPinG0001403600.01.T01	0
7- 8:	At-AT1G76050.2.TAIR10	Ft-FtPinG0001404100.01.T01	5e-175
7- 9:	At-AT1G76160.1.TAIR10	Ft-FtPinG0001404800.01.T01	0
7- 10:	At-AT1G76250.1.TAIR10	Ft-FtPinG0001406400.01.T01	4e-166
7- 11:	At-AT1G76270.1.TAIR10	Ft-FtPinG0001406600.01.T01	2e-158
## Alignment 8: score=478.0 e_value=2.7e-19 N=10 At-Chr1&Ft-Ft1 plus
8- 0:	At-AT1G75310.1.TAIR10	Ft-FtPinG0006543700.01.T01	2e-18
8- 1:	At-AT1G75380.1.TAIR10	Ft-FtPinG0006545800.01.T01	2e-140
8- 2:	At-AT1G75390.1.TAIR10	Ft-FtPinG0006546100.01.T01	4e-40
8- 3:	At-AT1G75410.1.TAIR10	Ft-FtPinG0006546400.01.T01	4e-78
8- 4:	At-AT1G75460.1.TAIR10	Ft-FtPinG0006547100.01.T01	1e-120
8- 5:	At-AT1G75500.1.TAIR10	Ft-FtPinG0006548000.01.T01	0
8- 6:	At-AT1G75520.1.TAIR10	Ft-FtPinG0006548400.01.T01	4e-63
8- 7:	At-AT1G75530.1.TAIR10	Ft-FtPinG0006548700.01.T01	6e-18
8- 8:	At-AT1G75540.1.TAIR10	Ft-FtPinG0006549100.01.T01	6e-57
8- 9:	At-AT1G75620.1.TAIR10	Ft-FtPinG0006549800.01.T01	0
## Alignment 9: score=436.0 e_value=7.5e-25 N=10 At-Chr1&Ft-Ft1 plus
9- 0:	At-AT1G55020.1.TAIR10	Ft-FtPinG0002952800.01.T01	0
9- 1:	At-AT1G55210.1.TAIR10	Ft-FtPinG0006630700.01.T01	8e-68
9- 2:	At-AT1G55230.1.TAIR10	Ft-FtPinG0006630000.01.T01	1e-123
9- 3:	At-AT1G55260.1.TAIR10	Ft-FtPinG0006629800.01.T01	7e-33
9- 4:	At-AT1G55265.1.TAIR10	Ft-FtPinG0005160700.01.T01	9e-32
9- 5:	At-AT1G55280.1.TAIR10	Ft-FtPinG0005162400.01.T01	2e-89
9- 6:	At-AT1G55320.1.TAIR10	Ft-FtPinG0009705400.01.T01	0
9- 7:	At-AT1G55510.1.TAIR10	Ft-FtPinG0009711100.01.T01	0
9- 8:	At-AT1G55530.1.TAIR10	Ft-FtPinG0009711600.01.T01	7e-106
9- 9:	At-AT1G55560.1.TAIR10	Ft-FtPinG0009711900.01.T01	2e-70
## Alignment 10: score=427.0 e_value=5.8e-16 N=9 At-Chr1&Ft-Ft1 plus
10- 0:	At-AT1G77280.1.TAIR10	Ft-FtPinG0005626700.01.T01	1e-156
10- 1:	At-AT1G77310.1.TAIR10	Ft-FtPinG0005626000.01.T01	8e-75
10- 2:	At-AT1G77330.1.TAIR10	Ft-FtPinG0005625500.01.T01	7e-164
10- 3:	At-AT1G77380.1.TAIR10	Ft-FtPinG0005624700.01.T01	0
10- 4:	At-AT1G77390.1.TAIR10	Ft-FtPinG0005624500.01.T01	1e-141
10- 5:	At-AT1G77450.1.TAIR10	Ft-FtPinG0005624400.01.T01	4e-105
10- 6:	At-AT1G77460.1.TAIR10	Ft-FtPinG0005624200.01.T01	0
10- 7:	At-AT1G77470.1.TAIR10	Ft-FtPinG0005623900.01.T01	0
10- 8:	At-AT1G77580.2.TAIR10	Ft-FtPinG0005622900.01.T01	6e-62
## Alignment 11: score=424.0 e_value=2.5e-17 N=9 At-Chr1&Ft-Ft1 plus
11- 0:	At-AT1G69295.1.TAIR10	Ft-FtPinG0000199500.01.T01	1e-31
11- 1:	At-AT1G69320.1.TAIR10	Ft-FtPinG0000202100.01.T01	1e-12
11- 2:	At-AT1G69360.1.TAIR10	Ft-FtPinG0000203200.01.T01	8e-40
11- 3:	At-AT1G69420.1.TAIR10	Ft-FtPinG0000206900.01.T01	0
11- 4:	At-AT1G69430.1.TAIR10	Ft-FtPinG0000207100.01.T01	2e-127
11- 5:	At-AT1G69450.1.TAIR10	Ft-FtPinG0000207400.01.T01	0
11- 6:	At-AT1G69460.1.TAIR10	Ft-FtPinG0000207600.01.T01	3e-99
11- 7:	At-AT1G69520.1.TAIR10	Ft-FtPinG0000209300.01.T01	1e-68
11- 8:	At-AT1G69530.3.TAIR10	Ft-FtPinG0000209500.01.T01	2e-154
## Alignment 12: score=421.0 e_value=6.5e-17 N=9 At-Chr1&Ft-Ft1 plus
12- 0:	At-AT1G26520.1.TAIR10	Ft-FtPinG0000198700.01.T01	0
12- 1:	At-AT1G26570.1.TAIR10	Ft-FtPinG0000200000.01.T01	0
12- 2:	At-AT1G26590.1.TAIR10	Ft-FtPinG0000200500.01.T01	2e-18
12- 3:	At-AT1G26600.1.TAIR10	Ft-FtPinG0000202100.01.T01	6e-12
12- 4:	At-AT1G26620.1.TAIR10	Ft-FtPinG0000203200.01.T01	5e-25
12- 5:	At-AT1G26640.1.TAIR10	Ft-FtPinG0000206800.01.T01	1e-161
12- 6:	At-AT1G26650.1.TAIR10	Ft-FtPinG0000207100.01.T01	2e-136
12- 7:	At-AT1G26690.1.TAIR10	Ft-FtPinG0000207600.01.T01	3e-101
12- 8:	At-AT1G26770.2.TAIR10	Ft-FtPinG0000209500.01.T01	1e-145
## Alignment 13: score=405.0 e_value=9.3e-17 N=9 At-Chr1&Ft-Ft1 plus
13- 0:	At-AT1G75060.1.TAIR10	Ft-FtPinG0000033900.01.T01	3e-94
13- 1:	At-AT1G75080.1.TAIR10	Ft-FtPinG0000033400.01.T01	4e-101
13- 2:	At-AT1G75110.1.TAIR10	Ft-FtPinG0000032100.01.T01	0
13- 3:	At-AT1G75130.1.TAIR10	Ft-FtPinG0000031700.01.T01	0
13- 4:	At-AT1G75150.1.TAIR10	Ft-FtPinG0000029900.01.T01	4e-47
13- 5:	At-AT1G75180.1.TAIR10	Ft-FtPinG0000024700.01.T01	5e-108
13- 6:	At-AT1G75200.1.TAIR10	Ft-FtPinG0000024100.01.T01	0
13- 7:	At-AT1G75220.1.TAIR10	Ft-FtPinG0000020700.01.T01	0
13- 8:	At-AT1G75250.1.TAIR10	Ft-FtPinG0000020100.01.T01	6e-28
## Alignment 14: score=389.0 e_value=5.2e-18 N=9 At-Chr1&Ft-Ft1 plus
14- 0:	At-AT1G75590.1.TAIR10	Ft-FtPinG0008443500.01.T01	2e-42
14- 1:	At-AT1G75660.1.TAIR10	Ft-FtPinG0008444900.01.T01	0
14- 2:	At-AT1G75760.1.TAIR10	Ft-FtPinG0002988200.01.T01	4e-166
14- 3:	At-AT1G75800.1.TAIR10	Ft-FtPinG0002991900.01.T02	6e-92
14- 4:	At-AT1G75990.1.TAIR10	Ft-FtPinG0002998200.01.T01	0
14- 5:	At-AT1G76010.1.TAIR10	Ft-FtPinG0002998400.01.T01	4e-79
14- 6:	At-AT1G76065.1.TAIR10	Ft-FtPinG0006707000.01.T01	4e-37
14- 7:	At-AT1G76100.1.TAIR10	Ft-FtPinG0006708000.01.T01	1e-74
14- 8:	At-AT1G76160.1.TAIR10	Ft-FtPinG0006708600.01.T01	0
## Alignment 15: score=386.0 e_value=3.2e-18 N=9 At-Chr1&Ft-Ft1 plus
15- 0:	At-AT1G19840.1.TAIR10	Ft-FtPinG0001397900.01.T01	5e-38
15- 1:	At-AT1G19950.1.TAIR10	Ft-FtPinG0001399900.01.T01	1e-98
15- 2:	At-AT1G19970.1.TAIR10	Ft-FtPinG0001400600.01.T01	8e-168
15- 3:	At-AT1G20080.1.TAIR10	Ft-FtPinG0001401600.01.T01	0
15- 4:	At-AT1G20190.1.TAIR10	Ft-FtPinG0001403000.01.T01	1e-134
15- 5:	At-AT1G20200.1.TAIR10	Ft-FtPinG0001403600.01.T01	0
15- 6:	At-AT1G20430.1.TAIR10	Ft-FtPinG0001405400.01.T01	9e-35
15- 7:	At-AT1G20440.1.TAIR10	Ft-FtPinG0001405800.01.T01	2e-16
15- 8:	At-AT1G20550.1.TAIR10	Ft-FtPinG0001406600.01.T01	4e-151
## Alignment 16: score=361.0 e_value=7e-15 N=8 At-Chr1&Ft-Ft1 plus
16- 0:	At-AT1G21460.1.TAIR10	Ft-FtPinG0005631000.01.T01	2e-66
16- 1:	At-AT1G21590.1.TAIR10	Ft-FtPinG0005626700.01.T01	3e-154
16- 2:	At-AT1G21610.3.TAIR10	Ft-FtPinG0005626000.01.T01	1e-130
16- 3:	At-AT1G21640.2.TAIR10	Ft-FtPinG0005625800.01.T02	1e-100
16- 4:	At-AT1G21650.3.TAIR10	Ft-FtPinG0005625100.01.T02	0
16- 5:	At-AT1G21660.1.TAIR10	Ft-FtPinG0005625000.01.T01	4e-76
16- 6:	At-AT1G21690.3.TAIR10	Ft-FtPinG0005623900.01.T01	9e-62
16- 7:	At-AT1G21810.1.TAIR10	Ft-FtPinG0005622900.01.T01	4e-80
## Alignment 17: score=335.0 e_value=6.3e-11 N=7 At-Chr1&Ft-Ft1 plus
17- 0:	At-AT1G78390.1.TAIR10	Ft-FtPinG0000246400.01.T01	0
17- 1:	At-AT1G78420.1.TAIR10	Ft-FtPinG0000249100.01.T01	1e-118
17- 2:	At-AT1G78430.1.TAIR10	Ft-FtPinG0000249300.01.T01	2e-59
17- 3:	At-AT1G78440.1.TAIR10	Ft-FtPinG0000249600.01.T01	1e-134
17- 4:	At-AT1G78450.1.TAIR10	Ft-FtPinG0000249800.01.T01	3e-60
17- 5:	At-AT1G78510.1.TAIR10	Ft-FtPinG0000252000.01.T01	0
17- 6:	At-AT1G78540.2.TAIR10	Ft-FtPinG0000255600.01.T01	0
## Alignment 18: score=333.0 e_value=5.7e-14 N=8 At-Chr1&Ft-Ft1 plus
18- 0:	At-AT1G23290.1.TAIR10	Ft-FtPinG0003416900.01.T01	4e-90
18- 1:	At-AT1G23320.1.TAIR10	Ft-FtPinG0006046800.01.T01	8e-145
18- 2:	At-AT1G23340.1.TAIR10	Ft-FtPinG0006048000.01.T01	0
18- 3:	At-AT1G23550.1.TAIR10	Ft-FtPinG0006052500.01.T01	5e-45
18- 4:	At-AT1G23710.1.TAIR10	Ft-FtPinG0006053100.01.T01	8e-14
18- 5:	At-AT1G23730.1.TAIR10	Ft-FtPinG0006053300.01.T01	2e-41
18- 6:	At-AT1G23800.1.TAIR10	Ft-FtPinG0001701600.01.T01	0
18- 7:	At-AT1G23980.1.TAIR10	Ft-FtPinG0001703200.01.T01	2e-81
## Alignment 19: score=332.0 e_value=2.5e-13 N=8 At-Chr1&Ft-Ft1 plus
19- 0:	At-AT1G24300.1.TAIR10	Ft-FtPinG0000126300.01.T01	1e-96
19- 1:	At-AT1G24320.1.TAIR10	Ft-FtPinG0000132300.01.T01	0
19- 2:	At-AT1G24330.1.TAIR10	Ft-FtPinG0000133900.01.T01	0
19- 3:	At-AT1G24340.1.TAIR10	Ft-FtPinG0000135300.01.T01	0
19- 4:	At-AT1G24470.1.TAIR10	Ft-FtPinG0000141100.01.T01	2e-26
19- 5:	At-AT1G24530.1.TAIR10	Ft-FtPinG0000143500.01.T01	3e-63
19- 6:	At-AT1G24540.1.TAIR10	Ft-FtPinG0000145100.01.T01	4e-145
19- 7:	At-AT1G24590.1.TAIR10	Ft-FtPinG0000150800.01.T01	6e-47
## Alignment 20: score=293.0 e_value=1.5e-09 N=6 At-Chr1&Ft-Ft1 plus
20- 0:	At-AT1G44100.1.TAIR10	Ft-FtPinG0005624700.01.T01	0
20- 1:	At-AT1G44110.1.TAIR10	Ft-FtPinG0005624500.01.T01	0
20- 2:	At-AT1G44120.1.TAIR10	Ft-FtPinG0005624200.01.T01	0
20- 3:	At-AT1G44160.1.TAIR10	Ft-FtPinG0005623800.01.T01	6e-48
20- 4:	At-AT1G44170.1.TAIR10	Ft-FtPinG0005623500.01.T01	0
20- 5:	At-AT1G44414.1.TAIR10	Ft-FtPinG0005623400.01.T01	5e-51
## Alignment 21: score=290.0 e_value=2.3e-11 N=7 At-Chr1&Ft-Ft1 plus
21- 0:	At-AT1G23340.1.TAIR10	Ft-FtPinG0005821500.01.T01	0
21- 1:	At-AT1G23550.1.TAIR10	Ft-FtPinG0005819000.01.T01	3e-49
21- 2:	At-AT1G23710.1.TAIR10	Ft-FtPinG0005818800.01.T01	8e-13
21- 3:	At-AT1G23760.1.TAIR10	Ft-FtPinG0005817600.01.T01	0
21- 4:	At-AT1G23800.1.TAIR10	Ft-FtPinG0005816300.01.T01	0
21- 5:	At-AT1G23820.1.TAIR10	Ft-FtPinG0005815400.01.T01	7e-141
21- 6:	At-AT1G23980.1.TAIR10	Ft-FtPinG0005814900.01.T01	6e-91
## Alignment 22: score=282.0 e_value=9.6e-09 N=6 At-Chr1&Ft-Ft1 plus
22- 0:	At-AT1G45180.1.TAIR10	Ft-FtPinG0009768000.01.T01	8e-68
22- 1:	At-AT1G45201.1.TAIR10	Ft-FtPinG0009766400.01.T01	3e-110
22- 2:	At-AT1G45207.2.TAIR10	Ft-FtPinG0009765900.01.T01	2e-132
22- 3:	At-AT1G45233.2.TAIR10	Ft-FtPinG0009765800.01.T01	2e-176
22- 4:	At-AT1G45249.3.TAIR10	Ft-FtPinG0009765500.01.T01	1e-123
22- 5:	At-AT1G45545.1.TAIR10	Ft-FtPinG0005495300.01.T01	2e-127
## Alignment 23: score=282.0 e_value=9.7e-10 N=6 At-Chr1&Ft-Ft1 plus
23- 0:	At-AT1G13830.1.TAIR10	Ft-FtPinG0000199500.01.T01	1e-34
23- 1:	At-AT1G13890.1.TAIR10	Ft-FtPinG0000200900.01.T01	1e-100
23- 2:	At-AT1G13930.1.TAIR10	Ft-FtPinG0000202400.01.T01	3e-22
23- 3:	At-AT1G13940.1.TAIR10	Ft-FtPinG0000203200.01.T01	2e-33
23- 4:	At-AT1G14010.1.TAIR10	Ft-FtPinG0000207600.01.T01	5e-95
23- 5:	At-AT1G14020.1.TAIR10	Ft-FtPinG0000208900.01.T01	0
## Alignment 24: score=271.0 e_value=2.5e-08 N=6 At-Chr1&Ft-Ft1 plus
24- 0:	At-AT1G12320.1.TAIR10	Ft-FtPinG0000077200.01.T01	1e-54
24- 1:	At-AT1G12360.1.TAIR10	Ft-FtPinG0000075200.01.T01	0
24- 2:	At-AT1G12420.1.TAIR10	Ft-FtPinG0000073900.01.T01	0
24- 3:	At-AT1G12440.1.TAIR10	Ft-FtPinG0000072700.01.T01	1e-48
24- 4:	At-AT1G12450.1.TAIR10	Ft-FtPinG0000072200.01.T01	3e-100
24- 5:	At-AT1G12560.1.TAIR10	Ft-FtPinG0000068500.01.T01	6e-121
## Alignment 25: score=265.0 e_value=3.1e-10 N=6 At-Chr1&Ft-Ft1 plus
25- 0:	At-AT1G74740.1.TAIR10	Ft-FtPinG0002483600.01.T01	0
25- 1:	At-AT1G74790.1.TAIR10	Ft-FtPinG0002476700.01.T01	0
25- 2:	At-AT1G74870.1.TAIR10	Ft-FtPinG0002474400.01.T01	2e-21
25- 3:	At-AT1G74890.1.TAIR10	Ft-FtPinG0002474100.01.T01	1e-62
25- 4:	At-AT1G74910.1.TAIR10	Ft-FtPinG0002473300.01.T01	0
25- 5:	At-AT1G74920.1.TAIR10	Ft-FtPinG0002473100.01.T01	0
## Alignment 26: score=264.0 e_value=0 N=7 At-Chr1&Ft-Ft1 plus
26- 0:	At-AT1G62670.1.TAIR10	Ft-FtPinG0000288100.01.T01	1e-99
26- 1:	At-AT1G62680.1.TAIR10	Ft-FtPinG0000288300.01.T01	2e-28
26- 2:	At-AT1G62910.1.TAIR10	Ft-FtPinG0000295100.01.T01	2e-19
26- 3:	At-AT1G63080.1.TAIR10	Ft-FtPinG0000295500.01.T01	7e-93
26- 4:	At-AT1G63230.1.TAIR10	Ft-FtPinG0000303400.01.T01	2e-29
26- 5:	At-AT1G63320.1.TAIR10	Ft-FtPinG0000304400.01.T01	2e-30
26- 6:	At-AT1G63400.1.TAIR10	Ft-FtPinG0000304600.01.T01	5e-18
## Alignment 27: score=1092.0 e_value=1.2e-69 N=24 At-Chr1&Ft-Ft1 minus
27- 0:	At-AT1G69640.1.TAIR10	Ft-FtPinG0000186700.01.T01	3e-148
27- 1:	At-AT1G69690.1.TAIR10	Ft-FtPinG0000186600.01.T01	3e-29
27- 2:	At-AT1G69700.1.TAIR10	Ft-FtPinG0000186400.01.T01	4e-63
27- 3:	At-AT1G69710.1.TAIR10	Ft-FtPinG0000185600.01.T01	0
27- 4:	At-AT1G69760.1.TAIR10	Ft-FtPinG0000185100.01.T01	2e-29
27- 5:	At-AT1G69780.1.TAIR10	Ft-FtPinG0000183800.01.T01	3e-103
27- 6:	At-AT1G69790.1.TAIR10	Ft-FtPinG0000181000.01.T01	7e-168
27- 7:	At-AT1G69800.2.TAIR10	Ft-FtPinG0000180500.01.T01	0
27- 8:	At-AT1G69850.1.TAIR10	Ft-FtPinG0000179900.01.T01	0
27- 9:	At-AT1G69910.1.TAIR10	Ft-FtPinG0000178400.01.T01	2e-167
27- 10:	At-AT1G70100.3.TAIR10	Ft-FtPinG0000174500.01.T01	7e-33
27- 11:	At-AT1G70210.1.TAIR10	Ft-FtPinG0000171000.01.T01	2e-120
27- 12:	At-AT1G70230.1.TAIR10	Ft-FtPinG0000169400.01.T01	6e-35
27- 13:	At-AT1G70260.1.TAIR10	Ft-FtPinG0000168900.01.T01	2e-118
27- 14:	At-AT1G70280.2.TAIR10	Ft-FtPinG0000166300.01.T01	0
27- 15:	At-AT1G70290.1.TAIR10	Ft-FtPinG0000165500.01.T01	0
27- 16:	At-AT1G70310.1.TAIR10	Ft-FtPinG0000165100.01.T01	7e-180
27- 17:	At-AT1G70330.1.TAIR10	Ft-FtPinG0000163200.01.T01	0
27- 18:	At-AT1G70370.1.TAIR10	Ft-FtPinG0000161300.01.T01	0
27- 19:	At-AT1G70420.1.TAIR10	Ft-FtPinG0000159700.01.T01	8e-36
27- 20:	At-AT1G70490.1.TAIR10	Ft-FtPinG0000158300.01.T02	3e-134
27- 21:	At-AT1G70505.1.TAIR10	Ft-FtPinG0000155400.01.T01	1e-70
27- 22:	At-AT1G70560.1.TAIR10	Ft-FtPinG0000153200.01.T01	6e-141
27- 23:	At-AT1G70600.1.TAIR10	Ft-FtPinG0000151500.01.T01	5e-90
## Alignment 28: score=961.0 e_value=3.9e-66 N=21 At-Chr1&Ft-Ft1 minus
28- 0:	At-AT1G21090.1.TAIR10	Ft-FtPinG0002551600.01.T01	8e-43
28- 1:	At-AT1G21140.1.TAIR10	Ft-FtPinG0002547700.01.T01	7e-87
28- 2:	At-AT1G21310.1.TAIR10	Ft-FtPinG0002546900.01.T01	3e-11
28- 3:	At-AT1G21320.1.TAIR10	Ft-FtPinG0002546500.01.T01	9e-52
28- 4:	At-AT1G21326.1.TAIR10	Ft-FtPinG0002545500.01.T01	1e-12
28- 5:	At-AT1G21350.3.TAIR10	Ft-FtPinG0002545300.01.T01	5e-118
28- 6:	At-AT1G21360.1.TAIR10	Ft-FtPinG0002544400.01.T01	1e-71
28- 7:	At-AT1G21410.1.TAIR10	Ft-FtPinG0002540500.01.T01	0
28- 8:	At-AT1G21590.1.TAIR10	Ft-FtPinG0002536300.01.T01	0
28- 9:	At-AT1G21610.3.TAIR10	Ft-FtPinG0002535800.01.T01	1e-138
28- 10:	At-AT1G21640.2.TAIR10	Ft-FtPinG0002535600.01.T01	9e-114
28- 11:	At-AT1G21690.3.TAIR10	Ft-FtPinG0006565400.01.T01	0
28- 12:	At-AT1G21700.1.TAIR10	Ft-FtPinG0006564700.01.T01	0
28- 13:	At-AT1G21710.1.TAIR10	Ft-FtPinG0006564400.01.T02	2e-151
28- 14:	At-AT1G21740.1.TAIR10	Ft-FtPinG0006562800.01.T01	7e-66
28- 15:	At-AT1G21750.1.TAIR10	Ft-FtPinG0006562400.01.T01	0
28- 16:	At-AT1G21760.1.TAIR10	Ft-FtPinG0006559600.01.T01	0
28- 17:	At-AT1G21770.1.TAIR10	Ft-FtPinG0006559300.01.T01	9e-41
28- 18:	At-AT1G21780.1.TAIR10	Ft-FtPinG0006559200.01.T01	6e-172
28- 19:	At-AT1G21790.1.TAIR10	Ft-FtPinG0006559000.01.T01	4e-126
28- 20:	At-AT1G21810.1.TAIR10	Ft-FtPinG0006558500.01.T01	7e-48
## Alignment 29: score=857.0 e_value=8.6e-54 N=19 At-Chr1&Ft-Ft1 minus
29- 0:	At-AT1G76740.1.TAIR10	Ft-FtPinG0002555400.01.T01	5e-16
29- 1:	At-AT1G76880.1.TAIR10	Ft-FtPinG0002549300.01.T01	4e-138
29- 2:	At-AT1G76920.1.TAIR10	Ft-FtPinG0002547400.01.T01	8e-154
29- 3:	At-AT1G76940.1.TAIR10	Ft-FtPinG0002546500.01.T01	2e-59
29- 4:	At-AT1G77120.1.TAIR10	Ft-FtPinG0002540900.01.T01	2e-21
29- 5:	At-AT1G77260.1.TAIR10	Ft-FtPinG0002536500.01.T01	0
29- 6:	At-AT1G77280.1.TAIR10	Ft-FtPinG0002536300.01.T01	0
29- 7:	At-AT1G77290.1.TAIR10	Ft-FtPinG0002536200.01.T01	2e-133
29- 8:	At-AT1G77310.1.TAIR10	Ft-FtPinG0002535800.01.T01	5e-132
29- 9:	At-AT1G77330.1.TAIR10	Ft-FtPinG0006567500.01.T01	7e-171
29- 10:	At-AT1G77350.1.TAIR10	Ft-FtPinG0006567400.01.T01	3e-59
29- 11:	At-AT1G77380.1.TAIR10	Ft-FtPinG0006565700.01.T01	0
29- 12:	At-AT1G77390.1.TAIR10	Ft-FtPinG0006565500.01.T01	1e-142
29- 13:	At-AT1G77450.1.TAIR10	Ft-FtPinG0006563600.01.T01	2e-104
29- 14:	At-AT1G77500.1.TAIR10	Ft-FtPinG0006562800.01.T01	3e-62
29- 15:	At-AT1G77510.1.TAIR10	Ft-FtPinG0006562400.01.T01	0
29- 16:	At-AT1G77520.1.TAIR10	Ft-FtPinG0006560600.01.T01	1e-126
29- 17:	At-AT1G77540.1.TAIR10	Ft-FtPinG0006559300.01.T01	1e-36
29- 18:	At-AT1G77580.2.TAIR10	Ft-FtPinG0006558500.01.T01	8e-65
## Alignment 30: score=782.0 e_value=2.6e-44 N=17 At-Chr1&Ft-Ft1 minus
30- 0:	At-AT1G10350.1.TAIR10	Ft-FtPinG0000178700.01.T01	1e-145
30- 1:	At-AT1G10380.1.TAIR10	Ft-FtPinG0000176800.01.T01	4e-92
30- 2:	At-AT1G10410.1.TAIR10	Ft-FtPinG0000175700.01.T01	0
30- 3:	At-AT1G10460.1.TAIR10	Ft-FtPinG0000174400.01.T01	5e-85
30- 4:	At-AT1G10530.1.TAIR10	Ft-FtPinG0000170500.01.T01	3e-53
30- 5:	At-AT1G10540.1.TAIR10	Ft-FtPinG0000169500.01.T01	1e-174
30- 6:	At-AT1G10550.1.TAIR10	Ft-FtPinG0000163500.01.T01	3e-119
30- 7:	At-AT1G10570.1.TAIR10	Ft-FtPinG0000162600.01.T01	1e-95
30- 8:	At-AT1G10590.3.TAIR10	Ft-FtPinG0000161100.01.T01	3e-74
30- 9:	At-AT1G10600.1.TAIR10	Ft-FtPinG0000160000.01.T01	3e-101
30- 10:	At-AT1G10630.1.TAIR10	Ft-FtPinG0000158300.01.T02	1e-134
30- 11:	At-AT1G10640.1.TAIR10	Ft-FtPinG0000156900.01.T01	0
30- 12:	At-AT1G10650.1.TAIR10	Ft-FtPinG0000156100.01.T01	4e-141
30- 13:	At-AT1G10657.1.TAIR10	Ft-FtPinG0000156000.01.T01	2e-27
30- 14:	At-AT1G10660.1.TAIR10	Ft-FtPinG0000155400.01.T01	2e-114
30- 15:	At-AT1G10670.3.TAIR10	Ft-FtPinG0000154800.01.T01	0
30- 16:	At-AT1G10730.1.TAIR10	Ft-FtPinG0000152900.01.T01	0
## Alignment 31: score=738.0 e_value=1e-44 N=17 At-Chr1&Ft-Ft1 minus
31- 0:	At-AT1G63720.1.TAIR10	Ft-FtPinG0008833100.01.T01	1e-68
31- 1:	At-AT1G63840.1.TAIR10	Ft-FtPinG0009285700.01.T01	1e-56
31- 2:	At-AT1G64050.1.TAIR10	Ft-FtPinG0009283200.01.T01	1e-58
31- 3:	At-AT1G64180.1.TAIR10	Ft-FtPinG0006435200.01.T01	3e-78
31- 4:	At-AT1G64185.1.TAIR10	Ft-FtPinG0006435300.01.T01	2e-62
31- 5:	At-AT1G64300.1.TAIR10	Ft-FtPinG0006437300.01.T01	0
31- 6:	At-AT1G64320.1.TAIR10	Ft-FtPinG0006437700.01.T01	7e-18
31- 7:	At-AT1G64340.1.TAIR10	Ft-FtPinG0003026000.01.T01	2e-14
31- 8:	At-AT1G64380.1.TAIR10	Ft-FtPinG0003023300.01.T01	9e-65
31- 9:	At-AT1G64390.1.TAIR10	Ft-FtPinG0000392200.01.T01	0
31- 10:	At-AT1G64440.1.TAIR10	Ft-FtPinG0000391000.01.T01	0
31- 11:	At-AT1G64450.1.TAIR10	Ft-FtPinG0000390300.01.T01	2e-41
31- 12:	At-AT1G64520.1.TAIR10	Ft-FtPinG0000386200.01.T01	1e-147
31- 13:	At-AT1G64620.1.TAIR10	Ft-FtPinG0000383700.01.T01	1e-49
31- 14:	At-AT1G64680.1.TAIR10	Ft-FtPinG0000382400.01.T01	5e-138
31- 15:	At-AT1G64690.1.TAIR10	Ft-FtPinG0000381800.01.T01	3e-23
31- 16:	At-AT1G64720.1.TAIR10	Ft-FtPinG0000380100.01.T01	2e-178
## Alignment 32: score=704.0 e_value=4.7e-38 N=15 At-Chr1&Ft-Ft1 minus
32- 0:	At-AT1G75020.1.TAIR10	Ft-FtPinG0005605100.01.T01	1e-169
32- 1:	At-AT1G75100.1.TAIR10	Ft-FtPinG0005606400.01.T01	1e-45
32- 2:	At-AT1G75110.1.TAIR10	Ft-FtPinG0005606600.01.T01	0
32- 3:	At-AT1G75170.1.TAIR10	Ft-FtPinG0005609100.01.T01	1e-144
32- 4:	At-AT1G75250.1.TAIR10	Ft-FtPinG0005610200.01.T01	2e-34
32- 5:	At-AT1G75280.1.TAIR10	Ft-FtPinG0005610900.01.T01	9e-165
32- 6:	At-AT1G75330.1.TAIR10	Ft-FtPinG0005611800.01.T01	0
32- 7:	At-AT1G75350.1.TAIR10	Ft-FtPinG0005611900.01.T01	2e-52
32- 8:	At-AT1G75400.1.TAIR10	Ft-FtPinG0005612900.01.T01	7e-114
32- 9:	At-AT1G75410.1.TAIR10	Ft-FtPinG0005613200.01.T01	3e-106
32- 10:	At-AT1G75440.1.TAIR10	Ft-FtPinG0005613600.01.T01	3e-93
32- 11:	At-AT1G75450.1.TAIR10	Ft-FtPinG0005613800.01.T01	0
32- 12:	At-AT1G75520.1.TAIR10	Ft-FtPinG0005615200.01.T01	4e-67
32- 13:	At-AT1G75560.1.TAIR10	Ft-FtPinG0005616400.01.T01	5e-99
32- 14:	At-AT1G75630.2.TAIR10	Ft-FtPinG0005617000.01.T01	2e-101
## Alignment 33: score=653.0 e_value=1.2e-37 N=15 At-Chr1&Ft-Ft1 minus
33- 0:	At-AT1G59725.1.TAIR10	Ft-FtPinG0000178700.01.T01	5e-143
33- 1:	At-AT1G59910.1.TAIR10	Ft-FtPinG0000174800.01.T01	6e-155
33- 2:	At-AT1G60010.1.TAIR10	Ft-FtPinG0000170500.01.T01	2e-57
33- 3:	At-AT1G60030.1.TAIR10	Ft-FtPinG0000169500.01.T01	0
33- 4:	At-AT1G60050.1.TAIR10	Ft-FtPinG0000168900.01.T01	5e-102
33- 5:	At-AT1G60070.2.TAIR10	Ft-FtPinG0000166500.01.T02	0
33- 6:	At-AT1G60140.1.TAIR10	Ft-FtPinG0000165500.01.T01	0
33- 7:	At-AT1G60220.1.TAIR10	Ft-FtPinG0000162600.01.T01	6e-108
33- 8:	At-AT1G60230.1.TAIR10	Ft-FtPinG0000162300.01.T01	0
33- 9:	At-AT1G60390.1.TAIR10	Ft-FtPinG0000161300.01.T01	0
33- 10:	At-AT1G60490.1.TAIR10	Ft-FtPinG0000157300.01.T01	0
33- 11:	At-AT1G60550.1.TAIR10	Ft-FtPinG0000157100.01.T01	8e-166
33- 12:	At-AT1G60590.1.TAIR10	Ft-FtPinG0000156900.01.T01	0
33- 13:	At-AT1G60610.1.TAIR10	Ft-FtPinG0000156100.01.T01	3e-127
33- 14:	At-AT1G60780.1.TAIR10	Ft-FtPinG0000152900.01.T01	0
## Alignment 34: score=503.0 e_value=3.8e-25 N=11 At-Chr1&Ft-Ft1 minus
34- 0:	At-AT1G19360.1.TAIR10	Ft-FtPinG0005606600.01.T01	0
34- 1:	At-AT1G19510.1.TAIR10	Ft-FtPinG0005610200.01.T01	1e-29
34- 2:	At-AT1G19540.1.TAIR10	Ft-FtPinG0005610900.01.T01	5e-130
34- 3:	At-AT1G19580.1.TAIR10	Ft-FtPinG0005611100.01.T01	1e-171
34- 4:	At-AT1G19600.1.TAIR10	Ft-FtPinG0005611300.01.T01	0
34- 5:	At-AT1G19680.1.TAIR10	Ft-FtPinG0005612900.01.T01	2e-101
34- 6:	At-AT1G19700.1.TAIR10	Ft-FtPinG0005613200.01.T01	4e-111
34- 7:	At-AT1G19715.3.TAIR10	Ft-FtPinG0005614000.01.T01	0
34- 8:	At-AT1G19730.1.TAIR10	Ft-FtPinG0005614600.01.T01	9e-41
34- 9:	At-AT1G19790.1.TAIR10	Ft-FtPinG0005615200.01.T01	7e-57
34- 10:	At-AT1G19910.1.TAIR10	Ft-FtPinG0005617000.01.T01	1e-109
## Alignment 35: score=474.0 e_value=1.2e-20 N=10 At-Chr1&Ft-Ft1 minus
35- 0:	At-AT1G68920.1.TAIR10	Ft-FtPinG0000220600.01.T01	3e-89
35- 1:	At-AT1G68940.3.TAIR10	Ft-FtPinG0000219800.01.T01	0
35- 2:	At-AT1G69010.1.TAIR10	Ft-FtPinG0000216200.01.T01	2e-81
35- 3:	At-AT1G69020.1.TAIR10	Ft-FtPinG0000215900.01.T01	0
35- 4:	At-AT1G69040.2.TAIR10	Ft-FtPinG0000213800.01.T01	0
35- 5:	At-AT1G69060.1.TAIR10	Ft-FtPinG0000213400.01.T01	3e-57
35- 6:	At-AT1G69120.1.TAIR10	Ft-FtPinG0000213100.01.T01	4e-106
35- 7:	At-AT1G69160.1.TAIR10	Ft-FtPinG0000212400.01.T01	6e-36
35- 8:	At-AT1G69170.1.TAIR10	Ft-FtPinG0000212200.01.T01	4e-46
35- 9:	At-AT1G69180.1.TAIR10	Ft-FtPinG0000211900.01.T01	2e-55
## Alignment 36: score=455.0 e_value=2e-21 N=10 At-Chr1&Ft-Ft1 minus
36- 0:	At-AT1G70230.1.TAIR10	Ft-FtPinG0001703600.01.T01	6e-89
36- 1:	At-AT1G70260.1.TAIR10	Ft-FtPinG0001703300.01.T01	7e-74
36- 2:	At-AT1G70410.2.TAIR10	Ft-FtPinG0006053300.01.T01	2e-41
36- 3:	At-AT1G70420.1.TAIR10	Ft-FtPinG0006053100.01.T01	1e-14
36- 4:	At-AT1G70440.1.TAIR10	Ft-FtPinG0006052500.01.T01	4e-37
36- 5:	At-AT1G70505.1.TAIR10	Ft-FtPinG0006049400.01.T01	2e-73
36- 6:	At-AT1G70550.1.TAIR10	Ft-FtPinG0006048000.01.T01	0
36- 7:	At-AT1G70560.1.TAIR10	Ft-FtPinG0006046800.01.T01	2e-143
36- 8:	At-AT1G70600.1.TAIR10	Ft-FtPinG0003416900.01.T01	2e-89
36- 9:	At-AT1G70640.1.TAIR10	Ft-FtPinG0003416800.01.T02	1e-35
## Alignment 37: score=454.0 e_value=6.8e-23 N=10 At-Chr1&Ft-Ft1 minus
37- 0:	At-AT1G12960.1.TAIR10	Ft-FtPinG0000151500.01.T01	8e-39
37- 1:	At-AT1G12970.1.TAIR10	Ft-FtPinG0000151000.01.T01	3e-117
37- 2:	At-AT1G12980.1.TAIR10	Ft-FtPinG0000150800.01.T01	3e-34
37- 3:	At-AT1G12990.1.TAIR10	Ft-FtPinG0000150400.01.T01	0
37- 4:	At-AT1G13020.1.TAIR10	Ft-FtPinG0000149500.01.T01	4e-120
37- 5:	At-AT1G13030.1.TAIR10	Ft-FtPinG0000147800.01.T01	2e-39
37- 6:	At-AT1G13130.1.TAIR10	Ft-FtPinG0000145400.01.T02	0
37- 7:	At-AT1G13140.1.TAIR10	Ft-FtPinG0000145100.01.T01	2e-140
37- 8:	At-AT1G13190.1.TAIR10	Ft-FtPinG0000143200.01.T01	2e-47
37- 9:	At-AT1G13440.1.TAIR10	Ft-FtPinG0000136000.01.T02	0
## Alignment 38: score=420.0 e_value=9e-18 N=9 At-Chr1&Ft-Ft1 minus
38- 0:	At-AT1G78570.1.TAIR10	Ft-FtPinG0001873900.01.T01	0
38- 1:	At-AT1G78580.1.TAIR10	Ft-FtPinG0001874200.01.T01	0
38- 2:	At-AT1G78600.2.TAIR10	Ft-FtPinG0008621100.01.T01	4e-75
38- 3:	At-AT1G78700.1.TAIR10	Ft-FtPinG0008622800.01.T02	6e-110
38- 4:	At-AT1G78770.1.TAIR10	Ft-FtPinG0008625300.01.T01	0
38- 5:	At-AT1G78800.1.TAIR10	Ft-FtPinG0008625600.01.T01	0
38- 6:	At-AT1G78815.1.TAIR10	Ft-FtPinG0008626800.01.T01	2e-81
38- 7:	At-AT1G78820.1.TAIR10	Ft-FtPinG0008627800.01.T01	9e-123
38- 8:	At-AT1G78870.1.TAIR10	Ft-FtPinG0008627400.01.T01	5e-108
## Alignment 39: score=398.0 e_value=1.2e-16 N=9 At-Chr1&Ft-Ft1 minus
39- 0:	At-AT1G26820.1.TAIR10	Ft-FtPinG0000196900.01.T01	1e-98
39- 1:	At-AT1G26920.1.TAIR10	Ft-FtPinG0000185100.01.T01	7e-33
39- 2:	At-AT1G26930.1.TAIR10	Ft-FtPinG0000184900.01.T01	2e-180
39- 3:	At-AT1G26960.1.TAIR10	Ft-FtPinG0000183800.01.T01	4e-86
39- 4:	At-AT1G26970.1.TAIR10	Ft-FtPinG0000181000.01.T01	3e-162
39- 5:	At-AT1G27040.1.TAIR10	Ft-FtPinG0000179900.01.T01	0
39- 6:	At-AT1G27110.1.TAIR10	Ft-FtPinG0000177700.01.T01	3e-18
39- 7:	At-AT1G27120.1.TAIR10	Ft-FtPinG0000176500.01.T01	0
39- 8:	At-AT1G27190.1.TAIR10	Ft-FtPinG0000173600.01.T01	0
## Alignment 40: score=391.0 e_value=7.4e-19 N=9 At-Chr1&Ft-Ft1 minus
40- 0:	At-AT1G54490.1.TAIR10	Ft-FtPinG0009188000.01.T02	0
40- 1:	At-AT1G54520.1.TAIR10	Ft-FtPinG0009688000.01.T01	3e-135
40- 2:	At-AT1G54580.1.TAIR10	Ft-FtPinG0006240800.01.T02	8e-40
40- 3:	At-AT1G54730.2.TAIR10	Ft-FtPinG0005056400.01.T02	4e-74
40- 4:	At-AT1G54820.1.TAIR10	Ft-FtPinG0002118400.01.T01	7e-165
40- 5:	At-AT1G54830.1.TAIR10	Ft-FtPinG0006238600.01.T01	1e-75
40- 6:	At-AT1G54840.1.TAIR10	Ft-FtPinG0006237800.01.T01	6e-30
40- 7:	At-AT1G54860.1.TAIR10	Ft-FtPinG0006237000.01.T01	3e-33
40- 8:	At-AT1G54960.1.TAIR10	Ft-FtPinG0006236500.01.T01	0
## Alignment 41: score=372.0 e_value=6.3e-15 N=8 At-Chr1&Ft-Ft1 minus
41- 0:	At-AT1G55260.1.TAIR10	Ft-FtPinG0000365800.01.T01	7e-32
41- 1:	At-AT1G55265.1.TAIR10	Ft-FtPinG0000364900.01.T01	6e-34
41- 2:	At-AT1G55290.1.TAIR10	Ft-FtPinG0007951100.01.T01	3e-144
41- 3:	At-AT1G55350.5.TAIR10	Ft-FtPinG0007149200.01.T01	3e-23
41- 4:	At-AT1G55360.1.TAIR10	Ft-FtPinG0000434000.01.T01	0
41- 5:	At-AT1G55475.1.TAIR10	Ft-FtPinG0000434500.01.T01	3e-16
41- 6:	At-AT1G55480.1.TAIR10	Ft-FtPinG0008406800.01.T01	2e-154
41- 7:	At-AT1G55530.1.TAIR10	Ft-FtPinG0008407800.01.T01	1e-53
## Alignment 42: score=371.0 e_value=1e-13 N=8 At-Chr1&Ft-Ft1 minus
42- 0:	At-AT1G14210.1.TAIR10	Ft-FtPinG0000196900.01.T01	2e-77
42- 1:	At-AT1G14230.1.TAIR10	Ft-FtPinG0000195400.01.T01	1e-148
42- 2:	At-AT1G14290.1.TAIR10	Ft-FtPinG0000186700.01.T01	2e-153
42- 3:	At-AT1G14330.1.TAIR10	Ft-FtPinG0000184900.01.T01	0
42- 4:	At-AT1G14350.1.TAIR10	Ft-FtPinG0000181800.01.T01	1e-60
42- 5:	At-AT1G14370.1.TAIR10	Ft-FtPinG0000181000.01.T01	2e-177
42- 6:	At-AT1G14400.1.TAIR10	Ft-FtPinG0000180700.01.T02	1e-78
42- 7:	At-AT1G14430.1.TAIR10	Ft-FtPinG0000180200.01.T01	0
## Alignment 43: score=354.0 e_value=1.6e-14 N=8 At-Chr1&Ft-Ft1 minus
43- 0:	At-AT1G07150.1.TAIR10	Ft-FtPinG0003168200.01.T01	9e-100
43- 1:	At-AT1G07200.2.TAIR10	Ft-FtPinG0003169600.01.T02	0
43- 2:	At-AT1G07380.1.TAIR10	Ft-FtPinG0003172000.01.T01	0
43- 3:	At-AT1G07420.1.TAIR10	Ft-FtPinG0003172700.01.T01	8e-174
43- 4:	At-AT1G07470.1.TAIR10	Ft-FtPinG0003173700.01.T02	3e-124
43- 5:	At-AT1G07510.1.TAIR10	Ft-FtPinG0003176700.01.T01	0
43- 6:	At-AT1G07520.1.TAIR10	Ft-FtPinG0003178000.01.T01	4e-23
43- 7:	At-AT1G07530.1.TAIR10	Ft-FtPinG0003179600.01.T01	5e-124
## Alignment 44: score=325.0 e_value=2.9e-12 N=7 At-Chr1&Ft-Ft1 minus
44- 0:	At-AT1G72520.1.TAIR10	Ft-FtPinG0008408200.01.T01	0
44- 1:	At-AT1G72670.1.TAIR10	Ft-FtPinG0008411800.01.T01	4e-47
44- 2:	At-AT1G72690.1.TAIR10	Ft-FtPinG0008411900.01.T01	2e-18
44- 3:	At-AT1G72700.1.TAIR10	Ft-FtPinG0008412100.01.T01	0
44- 4:	At-AT1G72710.1.TAIR10	Ft-FtPinG0008414100.01.T01	2e-39
44- 5:	At-AT1G72730.1.TAIR10	Ft-FtPinG0008414800.01.T01	0
44- 6:	At-AT1G72790.1.TAIR10	Ft-FtPinG0007837900.01.T01	6e-17
## Alignment 45: score=313.0 e_value=2.8e-12 N=7 At-Chr1&Ft-Ft1 minus
45- 0:	At-AT1G49270.1.TAIR10	Ft-FtPinG0001599200.01.T01	5e-178
45- 1:	At-AT1G49300.1.TAIR10	Ft-FtPinG0001598800.01.T01	8e-139
45- 2:	At-AT1G49380.1.TAIR10	Ft-FtPinG0001594600.01.T01	0
45- 3:	At-AT1G49410.1.TAIR10	Ft-FtPinG0001594200.01.T01	4e-22
45- 4:	At-AT1G49450.1.TAIR10	Ft-FtPinG0001593800.01.T01	9e-85
45- 5:	At-AT1G49590.1.TAIR10	Ft-FtPinG0001591800.01.T01	1e-28
45- 6:	At-AT1G49640.1.TAIR10	Ft-FtPinG0001591300.01.T01	6e-50
## Alignment 46: score=308.0 e_value=1.6e-10 N=7 At-Chr1&Ft-Ft1 minus
46- 0:	At-AT1G70310.1.TAIR10	Ft-FtPinG0005815400.01.T01	1e-136
46- 1:	At-AT1G70370.1.TAIR10	Ft-FtPinG0005817600.01.T01	0
46- 2:	At-AT1G70420.1.TAIR10	Ft-FtPinG0005818800.01.T01	6e-15
46- 3:	At-AT1G70440.1.TAIR10	Ft-FtPinG0005819000.01.T01	1e-43
46- 4:	At-AT1G70505.1.TAIR10	Ft-FtPinG0005819500.01.T01	1e-70
46- 5:	At-AT1G70550.1.TAIR10	Ft-FtPinG0005821500.01.T01	0
46- 6:	At-AT1G70640.1.TAIR10	Ft-FtPinG0005825300.01.T01	1e-36
## Alignment 47: score=286.0 e_value=1.8e-08 N=6 At-Chr1&Ft-Ft1 minus
47- 0:	At-AT1G17040.2.TAIR10	Ft-FtPinG0000255600.01.T01	0
47- 1:	At-AT1G17050.1.TAIR10	Ft-FtPinG0000252000.01.T01	0
47- 2:	At-AT1G17080.1.TAIR10	Ft-FtPinG0000251100.01.T01	1e-43
47- 3:	At-AT1G17100.1.TAIR10	Ft-FtPinG0000249800.01.T01	8e-81
47- 4:	At-AT1G17140.1.TAIR10	Ft-FtPinG0000249300.01.T01	1e-56
47- 5:	At-AT1G17145.1.TAIR10	Ft-FtPinG0000249100.01.T01	4e-106
## Alignment 48: score=269.0 e_value=9.7e-09 N=6 At-Chr1&Ft-Ft1 minus
48- 0:	At-AT1G55680.1.TAIR10	Ft-FtPinG0001383900.01.T01	0
48- 1:	At-AT1G55690.1.TAIR10	Ft-FtPinG0001383100.01.T01	0
48- 2:	At-AT1G55760.1.TAIR10	Ft-FtPinG0001380800.01.T01	9e-135
48- 3:	At-AT1G55805.1.TAIR10	Ft-FtPinG0001379900.01.T01	2e-32
48- 4:	At-AT1G55840.1.TAIR10	Ft-FtPinG0000323600.01.T01	9e-42
48- 5:	At-AT1G55860.1.TAIR10	Ft-FtPinG0000320900.01.T01	0
## Alignment 49: score=262.0 e_value=3e-08 N=6 At-Chr1&Ft-Ft1 minus
49- 0:	At-AT1G15290.1.TAIR10	Ft-FtPinG0008862800.01.T01	0
49- 1:	At-AT1G15360.1.TAIR10	Ft-FtPinG0008861700.01.T01	2e-65
49- 2:	At-AT1G15385.1.TAIR10	Ft-FtPinG0008861300.01.T01	5e-11
49- 3:	At-AT1G15460.1.TAIR10	Ft-FtPinG0008858700.01.T01	2e-140
49- 4:	At-AT1G15510.1.TAIR10	Ft-FtPinG0008857400.01.T01	1e-128
49- 5:	At-AT1G15670.1.TAIR10	Ft-FtPinG0008853000.01.T01	4e-106
## Alignment 50: score=1813.0 e_value=9.8e-146 N=41 At-Chr1&Ft-Ft3 plus
50- 0:	At-AT1G63090.1.TAIR10	Ft-FtPinG0001186700.01.T01	4e-117
50- 1:	At-AT1G63110.1.TAIR10	Ft-FtPinG0001186600.01.T01	0
50- 2:	At-AT1G63260.1.TAIR10	Ft-FtPinG0001183500.01.T01	1e-132
50- 3:	At-AT1G63300.1.TAIR10	Ft-FtPinG0001183000.01.T01	0
50- 4:	At-AT1G63430.2.TAIR10	Ft-FtPinG0001182600.01.T01	0
50- 5:	At-AT1G63440.1.TAIR10	Ft-FtPinG0001181800.01.T01	0
50- 6:	At-AT1G63450.1.TAIR10	Ft-FtPinG0008831400.01.T01	4e-167
50- 7:	At-AT1G63460.1.TAIR10	Ft-FtPinG0008831200.01.T01	6e-86
50- 8:	At-AT1G63520.1.TAIR10	Ft-FtPinG0005356600.01.T01	2e-54
50- 9:	At-AT1G63640.1.TAIR10	Ft-FtPinG0005356100.01.T01	0
50- 10:	At-AT1G63690.1.TAIR10	Ft-FtPinG0005355500.01.T01	0
50- 11:	At-AT1G63720.1.TAIR10	Ft-FtPinG0005355300.01.T01	2e-49
50- 12:	At-AT1G63770.5.TAIR10	Ft-FtPinG0005355100.01.T01	0
50- 13:	At-AT1G63820.1.TAIR10	Ft-FtPinG0007624400.01.T01	2e-39
50- 14:	At-AT1G63840.1.TAIR10	Ft-FtPinG0007624800.01.T01	1e-57
50- 15:	At-AT1G63850.1.TAIR10	Ft-FtPinG0007625100.01.T01	0
50- 16:	At-AT1G63910.1.TAIR10	Ft-FtPinG0005092500.01.T01	2e-83
50- 17:	At-AT1G63940.2.TAIR10	Ft-FtPinG0005092000.01.T01	0
50- 18:	At-AT1G63980.1.TAIR10	Ft-FtPinG0005090000.01.T01	4e-113
50- 19:	At-AT1G64000.1.TAIR10	Ft-FtPinG0005089400.01.T01	2e-54
50- 20:	At-AT1G64060.1.TAIR10	Ft-FtPinG0005088200.01.T01	0
50- 21:	At-AT1G64080.1.TAIR10	Ft-FtPinG0005087100.01.T01	7e-18
50- 22:	At-AT1G64090.2.TAIR10	Ft-FtPinG0005087000.01.T01	7e-93
50- 23:	At-AT1G64140.1.TAIR10	Ft-FtPinG0005085100.01.T01	0
50- 24:	At-AT1G64170.1.TAIR10	Ft-FtPinG0005084900.01.T01	0
50- 25:	At-AT1G64190.1.TAIR10	Ft-FtPinG0005084700.01.T01	0
50- 26:	At-AT1G64200.1.TAIR10	Ft-FtPinG0005081700.01.T01	1e-125
50- 27:	At-AT1G64320.1.TAIR10	Ft-FtPinG0005079200.01.T01	8e-20
50- 28:	At-AT1G64350.1.TAIR10	Ft-FtPinG0006387500.01.T01	1e-152
50- 29:	At-AT1G64355.1.TAIR10	Ft-FtPinG0006387700.01.T01	1e-38
50- 30:	At-AT1G64385.1.TAIR10	Ft-FtPinG0006388900.01.T01	2e-59
50- 31:	At-AT1G64390.1.TAIR10	Ft-FtPinG0006389100.01.T01	0
50- 32:	At-AT1G64400.1.TAIR10	Ft-FtPinG0006389600.01.T02	0
50- 33:	At-AT1G64440.1.TAIR10	Ft-FtPinG0006394700.01.T01	0
50- 34:	At-AT1G64500.1.TAIR10	Ft-FtPinG0001741300.01.T01	2e-20
50- 35:	At-AT1G64520.1.TAIR10	Ft-FtPinG0001743100.01.T01	7e-152
50- 36:	At-AT1G64530.1.TAIR10	Ft-FtPinG0001744100.01.T02	0
50- 37:	At-AT1G64620.1.TAIR10	Ft-FtPinG0001746600.01.T01	4e-57
50- 38:	At-AT1G64660.1.TAIR10	Ft-FtPinG0001747900.01.T01	0
50- 39:	At-AT1G64670.1.TAIR10	Ft-FtPinG0001750400.01.T01	0
50- 40:	At-AT1G64720.1.TAIR10	Ft-FtPinG0005567200.01.T01	0
## Alignment 51: score=823.0 e_value=5.5e-47 N=18 At-Chr1&Ft-Ft3 plus
51- 0:	At-AT1G75590.1.TAIR10	Ft-FtPinG0000764300.01.T01	1e-39
51- 1:	At-AT1G75690.1.TAIR10	Ft-FtPinG0000765800.01.T01	5e-78
51- 2:	At-AT1G75700.1.TAIR10	Ft-FtPinG0000766300.01.T01	1e-77
51- 3:	At-AT1G75720.1.TAIR10	Ft-FtPinG0000766600.01.T01	1e-19
51- 4:	At-AT1G75750.1.TAIR10	Ft-FtPinG0000767400.01.T01	1e-24
51- 5:	At-AT1G75780.1.TAIR10	Ft-FtPinG0000767800.01.T01	0
51- 6:	At-AT1G75800.1.TAIR10	Ft-FtPinG0000768900.01.T02	7e-123
51- 7:	At-AT1G75840.1.TAIR10	Ft-FtPinG0000770900.01.T02	2e-128
51- 8:	At-AT1G75980.1.TAIR10	Ft-FtPinG0000772200.01.T01	5e-92
51- 9:	At-AT1G76060.1.TAIR10	Ft-FtPinG0000772700.01.T01	5e-61
51- 10:	At-AT1G76140.1.TAIR10	Ft-FtPinG0000774700.01.T01	0
51- 11:	At-AT1G76150.1.TAIR10	Ft-FtPinG0000775200.01.T01	7e-156
51- 12:	At-AT1G76185.1.TAIR10	Ft-FtPinG0000776500.01.T01	7e-40
51- 13:	At-AT1G76240.1.TAIR10	Ft-FtPinG0000777000.01.T01	8e-65
51- 14:	At-AT1G76360.1.TAIR10	Ft-FtPinG0000777800.01.T01	6e-155
51- 15:	At-AT1G76370.1.TAIR10	Ft-FtPinG0000778200.01.T01	1e-146
51- 16:	At-AT1G76410.1.TAIR10	Ft-FtPinG0000779300.01.T01	1e-61
51- 17:	At-AT1G76440.1.TAIR10	Ft-FtPinG0000779800.01.T01	1e-43
## Alignment 52: score=651.0 e_value=1e-43 N=16 At-Chr1&Ft-Ft3 plus
52- 0:	At-AT1G79750.1.TAIR10	Ft-FtPinG0005427300.01.T02	0
52- 1:	At-AT1G79780.1.TAIR10	Ft-FtPinG0007275600.01.T01	1e-37
52- 2:	At-AT1G79820.1.TAIR10	Ft-FtPinG0007278400.01.T01	0
52- 3:	At-AT1G79840.2.TAIR10	Ft-FtPinG0007279100.01.T01	0
52- 4:	At-AT1G79860.1.TAIR10	Ft-FtPinG0007279600.01.T01	0
52- 5:	At-AT1G79870.1.TAIR10	Ft-FtPinG0007281700.01.T01	9e-172
52- 6:	At-AT1G79960.1.TAIR10	Ft-FtPinG0007250300.01.T01	2e-22
52- 7:	At-AT1G79990.1.TAIR10	Ft-FtPinG0005140700.01.T02	1e-75
52- 8:	At-AT1G80240.1.TAIR10	Ft-FtPinG0008563500.01.T02	2e-143
52- 9:	At-AT1G80490.2.TAIR10	Ft-FtPinG0008568600.01.T01	0
52- 10:	At-AT1G80560.1.TAIR10	Ft-FtPinG0008569400.01.T01	0
52- 11:	At-AT1G80700.1.TAIR10	Ft-FtPinG0008502300.01.T01	2e-35
52- 12:	At-AT1G80810.2.TAIR10	Ft-FtPinG0008503300.01.T01	6e-61
52- 13:	At-AT1G80820.1.TAIR10	Ft-FtPinG0008503900.01.T01	3e-153
52- 14:	At-AT1G80830.1.TAIR10	Ft-FtPinG0008452500.01.T01	0
52- 15:	At-AT1G80860.1.TAIR10	Ft-FtPinG0004529800.01.T01	2e-89
## Alignment 53: score=632.0 e_value=1.9e-39 N=15 At-Chr1&Ft-Ft3 plus
53- 0:	At-AT1G51760.1.TAIR10	Ft-FtPinG0005424500.01.T01	0
53- 1:	At-AT1G51800.1.TAIR10	Ft-FtPinG0005424800.01.T01	1e-179
53- 2:	At-AT1G51910.1.TAIR10	Ft-FtPinG0005426900.01.T01	8e-42
53- 3:	At-AT1G51940.1.TAIR10	Ft-FtPinG0007272800.01.T01	0
53- 4:	At-AT1G51950.1.TAIR10	Ft-FtPinG0007273100.01.T01	8e-60
53- 5:	At-AT1G51960.1.TAIR10	Ft-FtPinG0007273500.01.T01	5e-46
53- 6:	At-AT1G52140.1.TAIR10	Ft-FtPinG0007274400.01.T01	9e-18
53- 7:	At-AT1G52150.2.TAIR10	Ft-FtPinG0007274800.01.T01	0
53- 8:	At-AT1G52220.1.TAIR10	Ft-FtPinG0007278600.01.T01	2e-46
53- 9:	At-AT1G52240.1.TAIR10	Ft-FtPinG0007282000.01.T01	2e-29
53- 10:	At-AT1G52290.1.TAIR10	Ft-FtPinG0007283400.01.T01	2e-174
53- 11:	At-AT1G52300.1.TAIR10	Ft-FtPinG0007249000.01.T01	1e-54
53- 12:	At-AT1G52420.1.TAIR10	Ft-FtPinG0005141300.01.T01	0
53- 13:	At-AT1G52460.1.TAIR10	Ft-FtPinG0008565100.01.T01	1e-39
53- 14:	At-AT1G52565.1.TAIR10	Ft-FtPinG0008565900.01.T01	1e-19
## Alignment 54: score=578.0 e_value=3.2e-32 N=13 At-Chr1&Ft-Ft3 plus
54- 0:	At-AT1G70650.2.TAIR10	Ft-FtPinG0006091300.01.T01	4e-115
54- 1:	At-AT1G70700.1.TAIR10	Ft-FtPinG0006092000.01.T01	1e-15
54- 2:	At-AT1G70740.1.TAIR10	Ft-FtPinG0004839800.01.T01	3e-163
54- 3:	At-AT1G70750.1.TAIR10	Ft-FtPinG0004842000.01.T01	5e-69
54- 4:	At-AT1G70770.1.TAIR10	Ft-FtPinG0004843600.01.T01	0
54- 5:	At-AT1G70780.1.TAIR10	Ft-FtPinG0004844400.01.T01	2e-54
54- 6:	At-AT1G70900.1.TAIR10	Ft-FtPinG0004490000.01.T01	3e-122
54- 7:	At-AT1G70940.1.TAIR10	Ft-FtPinG0007662200.01.T01	0
54- 8:	At-AT1G71010.1.TAIR10	Ft-FtPinG0000961200.01.T01	0
54- 9:	At-AT1G71015.1.TAIR10	Ft-FtPinG0000960900.01.T01	2e-40
54- 10:	At-AT1G71020.1.TAIR10	Ft-FtPinG0000960700.01.T01	0
54- 11:	At-AT1G71050.1.TAIR10	Ft-FtPinG0000960000.01.T01	9e-55
54- 12:	At-AT1G71090.1.TAIR10	Ft-FtPinG0008231400.01.T01	2e-44
## Alignment 55: score=537.0 e_value=1.3e-28 N=13 At-Chr1&Ft-Ft3 plus
55- 0:	At-AT1G19850.1.TAIR10	Ft-FtPinG0000764000.01.T01	0
55- 1:	At-AT1G19950.1.TAIR10	Ft-FtPinG0000766300.01.T01	2e-83
55- 2:	At-AT1G20010.1.TAIR10	Ft-FtPinG0000767800.01.T01	0
55- 3:	At-AT1G20030.2.TAIR10	Ft-FtPinG0000768900.01.T02	1e-125
55- 4:	At-AT1G20090.1.TAIR10	Ft-FtPinG0000770900.01.T02	3e-126
55- 5:	At-AT1G20190.1.TAIR10	Ft-FtPinG0000772400.01.T01	1e-137
55- 6:	At-AT1G20230.1.TAIR10	Ft-FtPinG0000773100.01.T01	0
55- 7:	At-AT1G20380.1.TAIR10	Ft-FtPinG0000774700.01.T01	0
55- 8:	At-AT1G20460.1.TAIR10	Ft-FtPinG0000776500.01.T01	1e-49
55- 9:	At-AT1G20650.1.TAIR10	Ft-FtPinG0000778200.01.T01	2e-163
55- 10:	At-AT1G20823.1.TAIR10	Ft-FtPinG0000779300.01.T01	3e-62
55- 11:	At-AT1G20870.1.TAIR10	Ft-FtPinG0000779800.01.T01	5e-39
55- 12:	At-AT1G20990.1.TAIR10	Ft-FtPinG0000780200.01.T01	2e-66
## Alignment 56: score=468.0 e_value=5.3e-20 N=10 At-Chr1&Ft-Ft3 plus
56- 0:	At-AT1G03590.1.TAIR10	Ft-FtPinG0004061300.01.T01	0
56- 1:	At-AT1G03610.1.TAIR10	Ft-FtPinG0004061000.01.T01	2e-127
56- 2:	At-AT1G03620.1.TAIR10	Ft-FtPinG0004060700.01.T01	3e-113
56- 3:	At-AT1G03630.1.TAIR10	Ft-FtPinG0004059800.01.T01	0
56- 4:	At-AT1G03687.1.TAIR10	Ft-FtPinG0004058000.01.T01	1e-153
56- 5:	At-AT1G03740.1.TAIR10	Ft-FtPinG0004055400.01.T01	1e-152
56- 6:	At-AT1G03770.2.TAIR10	Ft-FtPinG0004053000.01.T01	2e-66
56- 7:	At-AT1G03780.3.TAIR10	Ft-FtPinG0004052700.01.T01	0
56- 8:	At-AT1G03790.1.TAIR10	Ft-FtPinG0004051800.01.T01	5e-59
56- 9:	At-AT1G03810.1.TAIR10	Ft-FtPinG0004051600.01.T01	3e-53
## Alignment 57: score=439.0 e_value=1.1e-23 N=10 At-Chr1&Ft-Ft3 plus
57- 0:	At-AT1G67310.1.TAIR10	Ft-FtPinG0001782400.01.T01	0
57- 1:	At-AT1G67325.2.TAIR10	Ft-FtPinG0001781900.01.T01	1e-123
57- 2:	At-AT1G67530.1.TAIR10	Ft-FtPinG0001781200.01.T01	0
57- 3:	At-AT1G67570.1.TAIR10	Ft-FtPinG0009118400.01.T01	2e-170
57- 4:	At-AT1G67580.1.TAIR10	Ft-FtPinG0009117900.01.T01	0
57- 5:	At-AT1G67600.1.TAIR10	Ft-FtPinG0009117700.01.T01	1e-65
57- 6:	At-AT1G67620.1.TAIR10	Ft-FtPinG0009117200.01.T01	3e-48
57- 7:	At-AT1G67630.1.TAIR10	Ft-FtPinG0009116700.01.T01	0
57- 8:	At-AT1G67730.1.TAIR10	Ft-FtPinG0009114000.01.T01	7e-156
57- 9:	At-AT1G67900.1.TAIR10	Ft-FtPinG0009110600.01.T01	0
## Alignment 58: score=438.0 e_value=1.5e-17 N=9 At-Chr1&Ft-Ft3 plus
58- 0:	At-AT1G12310.1.TAIR10	Ft-FtPinG0006254400.01.T01	4e-71
58- 1:	At-AT1G12330.1.TAIR10	Ft-FtPinG0006255300.01.T01	4e-151
58- 2:	At-AT1G12380.1.TAIR10	Ft-FtPinG0006255600.01.T01	2e-160
58- 3:	At-AT1G12400.1.TAIR10	Ft-FtPinG0006256100.01.T01	2e-34
58- 4:	At-AT1G12410.1.TAIR10	Ft-FtPinG0006256300.01.T01	4e-43
58- 5:	At-AT1G12420.1.TAIR10	Ft-FtPinG0006256800.01.T01	0
58- 6:	At-AT1G12440.1.TAIR10	Ft-FtPinG0006258000.01.T01	2e-21
58- 7:	At-AT1G12450.1.TAIR10	Ft-FtPinG0006258300.01.T01	5e-106
58- 8:	At-AT1G12460.1.TAIR10	Ft-FtPinG0006258500.01.T01	0
## Alignment 59: score=432.0 e_value=7.5e-23 N=10 At-Chr1&Ft-Ft3 plus
59- 0:	At-AT1G31650.1.TAIR10	Ft-FtPinG0006262700.01.T01	0
59- 1:	At-AT1G31810.1.TAIR10	Ft-FtPinG0000900200.01.T01	0
59- 2:	At-AT1G31940.1.TAIR10	Ft-FtPinG0000898800.01.T01	5e-50
59- 3:	At-AT1G32150.1.TAIR10	Ft-FtPinG0000898000.01.T01	3e-123
59- 4:	At-AT1G32180.1.TAIR10	Ft-FtPinG0000897300.01.T01	7e-96
59- 5:	At-AT1G32190.1.TAIR10	Ft-FtPinG0000896500.01.T01	2e-162
59- 6:	At-AT1G32210.1.TAIR10	Ft-FtPinG0000896300.01.T01	7e-71
59- 7:	At-AT1G32230.1.TAIR10	Ft-FtPinG0000896000.01.T01	2e-89
59- 8:	At-AT1G32240.1.TAIR10	Ft-FtPinG0000894900.01.T01	2e-89
59- 9:	At-AT1G32250.1.TAIR10	Ft-FtPinG0000892800.01.T01	1e-76
## Alignment 60: score=369.0 e_value=5.1e-14 N=8 At-Chr1&Ft-Ft3 plus
60- 0:	At-AT1G03950.1.TAIR10	Ft-FtPinG0004190600.01.T01	4e-124
60- 1:	At-AT1G03980.1.TAIR10	Ft-FtPinG0004190300.01.T01	0
60- 2:	At-AT1G04010.1.TAIR10	Ft-FtPinG0004189900.01.T01	0
60- 3:	At-AT1G04030.1.TAIR10	Ft-FtPinG0004189600.01.T01	4e-39
60- 4:	At-AT1G04050.1.TAIR10	Ft-FtPinG0004188500.01.T01	1e-124
60- 5:	At-AT1G04130.1.TAIR10	Ft-FtPinG0004187800.01.T01	4e-170
60- 6:	At-AT1G04150.1.TAIR10	Ft-FtPinG0004183900.01.T01	0
60- 7:	At-AT1G04180.1.TAIR10	Ft-FtPinG0004183400.01.T01	4e-122
## Alignment 61: score=363.0 e_value=2.2e-19 N=9 At-Chr1&Ft-Ft3 plus
61- 0:	At-AT1G15250.1.TAIR10	Ft-FtPinG0007249000.01.T01	2e-57
61- 1:	At-AT1G15270.1.TAIR10	Ft-FtPinG0007249600.01.T01	4e-26
61- 2:	At-AT1G15490.1.TAIR10	Ft-FtPinG0008562900.01.T01	0
61- 3:	At-AT1G15750.1.TAIR10	Ft-FtPinG0008568600.01.T01	0
61- 4:	At-AT1G15860.3.TAIR10	Ft-FtPinG0008501900.01.T01	3e-70
61- 5:	At-AT1G15940.1.TAIR10	Ft-FtPinG0008503300.01.T01	2e-61
61- 6:	At-AT1G15950.1.TAIR10	Ft-FtPinG0008503900.01.T01	9e-161
61- 7:	At-AT1G15960.1.TAIR10	Ft-FtPinG0008452500.01.T01	0
61- 8:	At-AT1G15990.1.TAIR10	Ft-FtPinG0004530000.01.T01	0
## Alignment 62: score=327.0 e_value=1.4e-11 N=7 At-Chr1&Ft-Ft3 plus
62- 0:	At-AT1G61667.1.TAIR10	Ft-FtPinG0003229900.01.T01	6e-51
62- 1:	At-AT1G61730.1.TAIR10	Ft-FtPinG0003232100.01.T01	3e-25
62- 2:	At-AT1G61750.1.TAIR10	Ft-FtPinG0003232700.01.T01	3e-31
62- 3:	At-AT1G61810.3.TAIR10	Ft-FtPinG0003234300.01.T01	0
62- 4:	At-AT1G61860.1.TAIR10	Ft-FtPinG0003235200.01.T01	7e-171
62- 5:	At-AT1G61870.1.TAIR10	Ft-FtPinG0003235400.01.T01	5e-109
62- 6:	At-AT1G61950.1.TAIR10	Ft-FtPinG0003236700.01.T01	0
## Alignment 63: score=319.0 e_value=8.6e-12 N=7 At-Chr1&Ft-Ft3 plus
63- 0:	At-AT1G32770.1.TAIR10	Ft-FtPinG0007471500.01.T01	3e-101
63- 1:	At-AT1G32790.2.TAIR10	Ft-FtPinG0007470900.01.T01	2e-122
63- 2:	At-AT1G32850.1.TAIR10	Ft-FtPinG0007470600.01.T01	0
63- 3:	At-AT1G32860.1.TAIR10	Ft-FtPinG0007470300.01.T01	1e-128
63- 4:	At-AT1G32900.1.TAIR10	Ft-FtPinG0007470100.01.T01	0
63- 5:	At-AT1G32990.1.TAIR10	Ft-FtPinG0007468300.01.T01	1e-106
63- 6:	At-AT1G33230.1.TAIR10	Ft-FtPinG0007467900.01.T01	0
## Alignment 64: score=318.0 e_value=2.3e-11 N=7 At-Chr1&Ft-Ft3 plus
64- 0:	At-AT1G24260.2.TAIR10	Ft-FtPinG0001785400.01.T01	9e-25
64- 1:	At-AT1G24330.1.TAIR10	Ft-FtPinG0001781200.01.T01	0
64- 2:	At-AT1G24350.3.TAIR10	Ft-FtPinG0009117700.01.T01	5e-65
64- 3:	At-AT1G24440.1.TAIR10	Ft-FtPinG0009115800.01.T01	4e-88
64- 4:	At-AT1G24460.1.TAIR10	Ft-FtPinG0009115200.01.T01	2e-118
64- 5:	At-AT1G24470.1.TAIR10	Ft-FtPinG0009114000.01.T01	6e-106
64- 6:	At-AT1G24540.1.TAIR10	Ft-FtPinG0009112200.01.T01	0
## Alignment 65: score=307.0 e_value=3.4e-15 N=7 At-Chr1&Ft-Ft3 plus
65- 0:	At-AT1G53760.1.TAIR10	Ft-FtPinG0001472700.01.T01	4e-119
65- 1:	At-AT1G53770.2.TAIR10	Ft-FtPinG0001472500.01.T01	0
65- 2:	At-AT1G53800.2.TAIR10	Ft-FtPinG0001472300.01.T01	9e-134
65- 3:	At-AT1G53820.1.TAIR10	Ft-FtPinG0001472200.01.T01	3e-42
65- 4:	At-AT1G53880.1.TAIR10	Ft-FtPinG0001472000.01.T01	0
65- 5:	At-AT1G54080.2.TAIR10	Ft-FtPinG0002419000.01.T01	0
65- 6:	At-AT1G54200.1.TAIR10	Ft-FtPinG0002415700.01.T01	3e-35
## Alignment 66: score=287.0 e_value=4.4e-10 N=6 At-Chr1&Ft-Ft3 plus
66- 0:	At-AT1G62820.1.TAIR10	Ft-FtPinG0006254400.01.T01	1e-68
66- 1:	At-AT1G62870.1.TAIR10	Ft-FtPinG0006255600.01.T01	1e-153
66- 2:	At-AT1G62880.1.TAIR10	Ft-FtPinG0006255900.01.T01	2e-57
66- 3:	At-AT1G62886.1.TAIR10	Ft-FtPinG0006256100.01.T01	4e-26
66- 4:	At-AT1G62950.1.TAIR10	Ft-FtPinG0006258500.01.T01	0
66- 5:	At-AT1G62960.1.TAIR10	Ft-FtPinG0006258800.01.T01	0
## Alignment 67: score=273.0 e_value=3.7e-10 N=6 At-Chr1&Ft-Ft3 plus
67- 0:	At-AT1G02370.1.TAIR10	Ft-FtPinG0000404800.01.T01	1e-127
67- 1:	At-AT1G02610.1.TAIR10	Ft-FtPinG0000408000.01.T01	5e-47
67- 2:	At-AT1G02620.1.TAIR10	Ft-FtPinG0000408300.01.T01	5e-69
67- 3:	At-AT1G02640.1.TAIR10	Ft-FtPinG0000408900.01.T01	0
67- 4:	At-AT1G02650.1.TAIR10	Ft-FtPinG0000409100.01.T01	3e-155
67- 5:	At-AT1G02660.1.TAIR10	Ft-FtPinG0000409600.01.T01	0
## Alignment 68: score=263.0 e_value=5.3e-08 N=6 At-Chr1&Ft-Ft3 plus
68- 0:	At-AT1G64550.1.TAIR10	Ft-FtPinG0005144000.01.T01	0
68- 1:	At-AT1G64610.1.TAIR10	Ft-FtPinG0007479100.01.T01	9e-106
68- 2:	At-AT1G64650.1.TAIR10	Ft-FtPinG0007476600.01.T01	2e-25
68- 3:	At-AT1G64670.1.TAIR10	Ft-FtPinG0007472900.01.T01	0
68- 4:	At-AT1G64700.1.TAIR10	Ft-FtPinG0007471100.01.T01	3e-35
68- 5:	At-AT1G64720.1.TAIR10	Ft-FtPinG0007469900.01.T01	2e-171
## Alignment 69: score=255.0 e_value=1.9e-10 N=6 At-Chr1&Ft-Ft3 plus
69- 0:	At-AT1G11480.1.TAIR10	Ft-FtPinG0003230200.01.T01	2e-114
69- 1:	At-AT1G11500.1.TAIR10	Ft-FtPinG0003230500.01.T01	3e-36
69- 2:	At-AT1G11510.1.TAIR10	Ft-FtPinG0003232100.01.T01	4e-21
69- 3:	At-AT1G11630.1.TAIR10	Ft-FtPinG0003235400.01.T01	7e-97
69- 4:	At-AT1G11660.1.TAIR10	Ft-FtPinG0003236300.01.T02	0
69- 5:	At-AT1G11790.1.TAIR10	Ft-FtPinG0003241700.01.T01	3e-142
## Alignment 70: score=1578.0 e_value=2.5e-117 N=35 At-Chr1&Ft-Ft3 minus
70- 0:	At-AT1G68940.3.TAIR10	Ft-FtPinG0000425100.01.T01	0
70- 1:	At-AT1G69060.1.TAIR10	Ft-FtPinG0001078300.01.T01	3e-68
70- 2:	At-AT1G69120.1.TAIR10	Ft-FtPinG0001079400.01.T01	1e-97
70- 3:	At-AT1G69170.1.TAIR10	Ft-FtPinG0006382900.01.T01	2e-45
70- 4:	At-AT1G69200.1.TAIR10	Ft-FtPinG0006079700.01.T01	0
70- 5:	At-AT1G69230.1.TAIR10	Ft-FtPinG0006080400.01.T01	1e-44
70- 6:	At-AT1G69260.1.TAIR10	Ft-FtPinG0006080500.01.T01	4e-44
70- 7:	At-AT1G69295.1.TAIR10	Ft-FtPinG0006082000.01.T01	7e-32
70- 8:	At-AT1G69310.1.TAIR10	Ft-FtPinG0006083600.01.T01	7e-54
70- 9:	At-AT1G69360.1.TAIR10	Ft-FtPinG0006084400.01.T01	7e-92
70- 10:	At-AT1G69420.1.TAIR10	Ft-FtPinG0006084500.01.T01	0
70- 11:	At-AT1G69440.1.TAIR10	Ft-FtPinG0006085000.01.T01	0
70- 12:	At-AT1G69480.1.TAIR10	Ft-FtPinG0006086600.01.T01	0
70- 13:	At-AT1G69490.1.TAIR10	Ft-FtPinG0006087500.01.T01	4e-104
70- 14:	At-AT1G69500.1.TAIR10	Ft-FtPinG0006087700.01.T01	0
70- 15:	At-AT1G69540.1.TAIR10	Ft-FtPinG0006088400.01.T01	5e-14
70- 16:	At-AT1G69560.1.TAIR10	Ft-FtPinG0006042600.01.T01	8e-72
70- 17:	At-AT1G69570.1.TAIR10	Ft-FtPinG0006042300.01.T01	3e-49
70- 18:	At-AT1G69580.2.TAIR10	Ft-FtPinG0006041600.01.T01	6e-73
70- 19:	At-AT1G69640.1.TAIR10	Ft-FtPinG0006038700.01.T01	1e-107
70- 20:	At-AT1G69780.1.TAIR10	Ft-FtPinG0001053400.01.T01	3e-84
70- 21:	At-AT1G69790.1.TAIR10	Ft-FtPinG0001052600.01.T02	0
70- 22:	At-AT1G69800.2.TAIR10	Ft-FtPinG0001051500.01.T01	0
70- 23:	At-AT1G69840.1.TAIR10	Ft-FtPinG0001050700.01.T01	5e-175
70- 24:	At-AT1G69860.1.TAIR10	Ft-FtPinG0001049200.01.T01	7e-174
70- 25:	At-AT1G69880.1.TAIR10	Ft-FtPinG0001049000.01.T01	3e-36
70- 26:	At-AT1G69890.1.TAIR10	Ft-FtPinG0004807800.01.T01	3e-105
70- 27:	At-AT1G70060.1.TAIR10	Ft-FtPinG0004812400.01.T01	0
70- 28:	At-AT1G70180.2.TAIR10	Ft-FtPinG0004814500.01.T01	1e-15
70- 29:	At-AT1G70210.1.TAIR10	Ft-FtPinG0009102300.01.T01	1e-112
70- 30:	At-AT1G70370.1.TAIR10	Ft-FtPinG0009104700.01.T01	0
70- 31:	At-AT1G70520.1.TAIR10	Ft-FtPinG0009108000.01.T01	1e-149
70- 32:	At-AT1G70550.1.TAIR10	Ft-FtPinG0009108900.01.T01	0
70- 33:	At-AT1G70600.1.TAIR10	Ft-FtPinG0009109800.01.T01	1e-90
70- 34:	At-AT1G70640.1.TAIR10	Ft-FtPinG0009109900.01.T01	4e-37
## Alignment 71: score=1454.0 e_value=8.1e-108 N=32 At-Chr1&Ft-Ft3 minus
71- 0:	At-AT1G63000.1.TAIR10	Ft-FtPinG0006254000.01.T01	0
71- 1:	At-AT1G63010.5.TAIR10	Ft-FtPinG0008032600.01.T01	0
71- 2:	At-AT1G63090.1.TAIR10	Ft-FtPinG0006602000.01.T01	2e-112
71- 3:	At-AT1G63100.1.TAIR10	Ft-FtPinG0006602200.01.T01	0
71- 4:	At-AT1G63120.1.TAIR10	Ft-FtPinG0008529800.01.T01	1e-151
71- 5:	At-AT1G63250.1.TAIR10	Ft-FtPinG0008531800.01.T01	0
71- 6:	At-AT1G63440.1.TAIR10	Ft-FtPinG0001685100.01.T01	0
71- 7:	At-AT1G63450.1.TAIR10	Ft-FtPinG0001685500.01.T01	0
71- 8:	At-AT1G63460.1.TAIR10	Ft-FtPinG0001685700.01.T01	4e-82
71- 9:	At-AT1G63470.1.TAIR10	Ft-FtPinG0001686000.01.T01	3e-77
71- 10:	At-AT1G63520.1.TAIR10	Ft-FtPinG0001687300.01.T01	6e-17
71- 11:	At-AT1G63650.1.TAIR10	Ft-FtPinG0001688900.01.T01	1e-153
71- 12:	At-AT1G63710.1.TAIR10	Ft-FtPinG0001690000.01.T01	0
71- 13:	At-AT1G63720.1.TAIR10	Ft-FtPinG0001690600.01.T01	1e-58
71- 14:	At-AT1G63800.1.TAIR10	Ft-FtPinG0001690900.01.T01	4e-92
71- 15:	At-AT1G63820.1.TAIR10	Ft-FtPinG0004084100.01.T01	4e-33
71- 16:	At-AT1G63830.1.TAIR10	Ft-FtPinG0004084000.01.T01	1e-124
71- 17:	At-AT1G63840.1.TAIR10	Ft-FtPinG0004083700.01.T01	2e-56
71- 18:	At-AT1G63850.1.TAIR10	Ft-FtPinG0004083600.01.T01	0
71- 19:	At-AT1G63930.1.TAIR10	Ft-FtPinG0004082400.01.T01	4e-132
71- 20:	At-AT1G63970.1.TAIR10	Ft-FtPinG0004082100.01.T01	5e-107
71- 21:	At-AT1G64060.1.TAIR10	Ft-FtPinG0004081600.01.T01	0
71- 22:	At-AT1G64090.2.TAIR10	Ft-FtPinG0004080400.01.T01	9e-93
71- 23:	At-AT1G64110.2.TAIR10	Ft-FtPinG0004080100.01.T01	0
71- 24:	At-AT1G64140.1.TAIR10	Ft-FtPinG0004078900.01.T01	0
71- 25:	At-AT1G64150.1.TAIR10	Ft-FtPinG0004078700.01.T01	8e-114
71- 26:	At-AT1G64210.1.TAIR10	Ft-FtPinG0004077800.01.T01	0
71- 27:	At-AT1G64380.1.TAIR10	Ft-FtPinG0008126800.01.T01	4e-61
71- 28:	At-AT1G64390.1.TAIR10	Ft-FtPinG0008126900.01.T01	0
71- 29:	At-AT1G64460.1.TAIR10	Ft-FtPinG0008594800.01.T01	1e-151
71- 30:	At-AT1G64480.1.TAIR10	Ft-FtPinG0008595200.01.T01	4e-73
71- 31:	At-AT1G64530.1.TAIR10	Ft-FtPinG0008950900.01.T02	0
## Alignment 72: score=1060.0 e_value=3.6e-70 N=23 At-Chr1&Ft-Ft3 minus
72- 0:	At-AT1G13600.1.TAIR10	Ft-FtPinG0000426800.01.T01	9e-31
72- 1:	At-AT1G13640.1.TAIR10	Ft-FtPinG0000424700.01.T01	0
72- 2:	At-AT1G13650.1.TAIR10	Ft-FtPinG0000424300.01.T01	4e-12
72- 3:	At-AT1G13740.1.TAIR10	Ft-FtPinG0006080500.01.T01	4e-46
72- 4:	At-AT1G13750.1.TAIR10	Ft-FtPinG0006081000.01.T01	0
72- 5:	At-AT1G13820.1.TAIR10	Ft-FtPinG0006081700.01.T01	7e-152
72- 6:	At-AT1G13830.1.TAIR10	Ft-FtPinG0006082000.01.T01	4e-31
72- 7:	At-AT1G13860.1.TAIR10	Ft-FtPinG0006082800.01.T01	0
72- 8:	At-AT1G13940.1.TAIR10	Ft-FtPinG0006084400.01.T01	2e-46
72- 9:	At-AT1G14040.1.TAIR10	Ft-FtPinG0006086600.01.T01	0
72- 10:	At-AT1G14070.1.TAIR10	Ft-FtPinG0006086900.01.T01	0
72- 11:	At-AT1G14160.1.TAIR10	Ft-FtPinG0006088000.01.T01	2e-65
72- 12:	At-AT1G14180.1.TAIR10	Ft-FtPinG0006088100.01.T01	2e-68
72- 13:	At-AT1G14210.1.TAIR10	Ft-FtPinG0006040700.01.T01	2e-67
72- 14:	At-AT1G14230.1.TAIR10	Ft-FtPinG0006040600.01.T01	3e-163
72- 15:	At-AT1G14260.1.TAIR10	Ft-FtPinG0006040400.01.T01	3e-64
72- 16:	At-AT1G14290.1.TAIR10	Ft-FtPinG0006038700.01.T01	6e-117
72- 17:	At-AT1G14330.1.TAIR10	Ft-FtPinG0006038100.01.T01	0
72- 18:	At-AT1G14350.1.TAIR10	Ft-FtPinG0001053000.01.T01	3e-105
72- 19:	At-AT1G14360.1.TAIR10	Ft-FtPinG0001052700.01.T01	0
72- 20:	At-AT1G14370.1.TAIR10	Ft-FtPinG0001052600.01.T02	0
72- 21:	At-AT1G14400.1.TAIR10	Ft-FtPinG0001051900.01.T01	8e-111
72- 22:	At-AT1G14420.1.TAIR10	Ft-FtPinG0001051100.01.T01	4e-177
## Alignment 73: score=852.0 e_value=2.8e-49 N=19 At-Chr1&Ft-Ft3 minus
73- 0:	At-AT1G26270.1.TAIR10	Ft-FtPinG0000424700.01.T01	0
73- 1:	At-AT1G26310.1.TAIR10	Ft-FtPinG0001079400.01.T01	6e-93
73- 2:	At-AT1G26340.1.TAIR10	Ft-FtPinG0005163900.01.T01	7e-55
73- 3:	At-AT1G26355.1.TAIR10	Ft-FtPinG0006080400.01.T01	7e-47
73- 4:	At-AT1G26440.2.TAIR10	Ft-FtPinG0006081200.01.T02	0
73- 5:	At-AT1G26470.1.TAIR10	Ft-FtPinG0006082500.01.T01	5e-44
73- 6:	At-AT1G26570.1.TAIR10	Ft-FtPinG0006082900.01.T01	0
73- 7:	At-AT1G26620.1.TAIR10	Ft-FtPinG0006084400.01.T01	3e-60
73- 8:	At-AT1G26730.1.TAIR10	Ft-FtPinG0006086600.01.T01	0
73- 9:	At-AT1G26780.2.TAIR10	Ft-FtPinG0006042600.01.T01	9e-68
73- 10:	At-AT1G26790.1.TAIR10	Ft-FtPinG0006042300.01.T01	5e-47
73- 11:	At-AT1G26820.1.TAIR10	Ft-FtPinG0006040700.01.T01	8e-96
73- 12:	At-AT1G26930.1.TAIR10	Ft-FtPinG0006038100.01.T01	2e-177
73- 13:	At-AT1G26945.1.TAIR10	Ft-FtPinG0001053600.01.T01	3e-35
73- 14:	At-AT1G26960.1.TAIR10	Ft-FtPinG0001053400.01.T01	3e-65
73- 15:	At-AT1G26970.1.TAIR10	Ft-FtPinG0001052600.01.T02	0
73- 16:	At-AT1G27020.1.TAIR10	Ft-FtPinG0001050200.01.T01	4e-109
73- 17:	At-AT1G27080.1.TAIR10	Ft-FtPinG0001049200.01.T01	0
73- 18:	At-AT1G27100.1.TAIR10	Ft-FtPinG0004807800.01.T01	8e-160
## Alignment 74: score=420.0 e_value=8.1e-18 N=9 At-Chr1&Ft-Ft3 minus
74- 0:	At-AT1G12320.1.TAIR10	Ft-FtPinG0001189900.01.T01	3e-58
74- 1:	At-AT1G12330.1.TAIR10	Ft-FtPinG0001190100.01.T01	8e-161
74- 2:	At-AT1G12360.1.TAIR10	Ft-FtPinG0001190500.01.T01	0
74- 3:	At-AT1G12420.1.TAIR10	Ft-FtPinG0004448500.01.T01	2e-159
74- 4:	At-AT1G12440.1.TAIR10	Ft-FtPinG0004448100.01.T01	3e-48
74- 5:	At-AT1G12500.1.TAIR10	Ft-FtPinG0004447800.01.T01	0
74- 6:	At-AT1G12520.1.TAIR10	Ft-FtPinG0004445900.01.T01	6e-138
74- 7:	At-AT1G12530.1.TAIR10	Ft-FtPinG0004445500.01.T01	2e-45
74- 8:	At-AT1G12560.1.TAIR10	Ft-FtPinG0004443000.01.T01	4e-123
## Alignment 75: score=420.0 e_value=6.1e-20 N=10 At-Chr1&Ft-Ft3 minus
75- 0:	At-AT1G01040.2.TAIR10	Ft-FtPinG0004105800.01.T01	0
75- 1:	At-AT1G01050.1.TAIR10	Ft-FtPinG0004105600.01.T01	6e-127
75- 2:	At-AT1G01200.1.TAIR10	Ft-FtPinG0004104300.01.T01	2e-101
75- 3:	At-AT1G01240.1.TAIR10	Ft-FtPinG0004100900.01.T01	2e-30
75- 4:	At-AT1G01440.1.TAIR10	Ft-FtPinG0004100200.01.T01	6e-70
75- 5:	At-AT1G01470.1.TAIR10	Ft-FtPinG0004098000.01.T01	5e-66
75- 6:	At-AT1G01510.1.TAIR10	Ft-FtPinG0004097800.01.T01	0
75- 7:	At-AT1G01560.2.TAIR10	Ft-FtPinG0004095200.01.T01	0
75- 8:	At-AT1G01660.1.TAIR10	Ft-FtPinG0004091600.01.T01	7e-49
75- 9:	At-AT1G01700.1.TAIR10	Ft-FtPinG0004090400.01.T01	6e-170
## Alignment 76: score=371.0 e_value=2.6e-14 N=8 At-Chr1&Ft-Ft3 minus
76- 0:	At-AT1G15340.1.TAIR10	Ft-FtPinG0008567300.01.T01	6e-46
76- 1:	At-AT1G15350.1.TAIR10	Ft-FtPinG0008566500.01.T01	2e-38
76- 2:	At-AT1G15370.1.TAIR10	Ft-FtPinG0008565600.01.T01	2e-66
76- 3:	At-AT1G15380.1.TAIR10	Ft-FtPinG0008565400.01.T01	2e-85
76- 4:	At-AT1G15460.1.TAIR10	Ft-FtPinG0008563300.01.T01	0
76- 5:	At-AT1G15520.1.TAIR10	Ft-FtPinG0008136100.01.T01	0
76- 6:	At-AT1G15580.1.TAIR10	Ft-FtPinG0005142100.01.T01	3e-48
76- 7:	At-AT1G15670.1.TAIR10	Ft-FtPinG0005141600.01.T01	2e-93
## Alignment 77: score=361.0 e_value=4.5e-15 N=8 At-Chr1&Ft-Ft3 minus
77- 0:	At-AT1G32400.1.TAIR10	Ft-FtPinG0006784100.01.T01	3e-98
77- 1:	At-AT1G32440.1.TAIR10	Ft-FtPinG0006783500.01.T01	0
77- 2:	At-AT1G32450.1.TAIR10	Ft-FtPinG0006783100.01.T01	0
77- 3:	At-AT1G32510.1.TAIR10	Ft-FtPinG0008676000.01.T01	3e-83
77- 4:	At-AT1G32540.1.TAIR10	Ft-FtPinG0008675400.01.T01	2e-75
77- 5:	At-AT1G32640.1.TAIR10	Ft-FtPinG0008670900.01.T01	0
77- 6:	At-AT1G32690.1.TAIR10	Ft-FtPinG0008635100.01.T01	5e-32
77- 7:	At-AT1G32700.1.TAIR10	Ft-FtPinG0008634800.01.T01	2e-91
## Alignment 78: score=352.0 e_value=3.6e-14 N=8 At-Chr1&Ft-Ft3 minus
78- 0:	At-AT1G22990.1.TAIR10	Ft-FtPinG0000960000.01.T01	5e-57
78- 1:	At-AT1G23030.1.TAIR10	Ft-FtPinG0000960700.01.T01	0
78- 2:	At-AT1G23080.1.TAIR10	Ft-FtPinG0007662200.01.T01	0
78- 3:	At-AT1G23090.1.TAIR10	Ft-FtPinG0001002800.01.T01	0
78- 4:	At-AT1G23110.1.TAIR10	Ft-FtPinG0004490000.01.T01	7e-127
78- 5:	At-AT1G23150.1.TAIR10	Ft-FtPinG0004844400.01.T01	9e-46
78- 6:	At-AT1G23170.2.TAIR10	Ft-FtPinG0004843600.01.T01	0
78- 7:	At-AT1G23220.1.TAIR10	Ft-FtPinG0006093400.01.T01	7e-66
## Alignment 79: score=352.0 e_value=2.3e-13 N=8 At-Chr1&Ft-Ft3 minus
79- 0:	At-AT1G28550.1.TAIR10	Ft-FtPinG0001216800.01.T01	8e-137
79- 1:	At-AT1G28960.1.TAIR10	Ft-FtPinG0001219500.01.T01	5e-118
79- 2:	At-AT1G29070.1.TAIR10	Ft-FtPinG0001220100.01.T01	7e-32
79- 3:	At-AT1G29160.1.TAIR10	Ft-FtPinG0001221400.01.T01	3e-48
79- 4:	At-AT1G29195.1.TAIR10	Ft-FtPinG0001222400.01.T01	3e-61
79- 5:	At-AT1G29230.1.TAIR10	Ft-FtPinG0001222700.01.T01	0
79- 6:	At-AT1G29310.1.TAIR10	Ft-FtPinG0001224200.01.T01	0
79- 7:	At-AT1G29340.1.TAIR10	Ft-FtPinG0001224300.01.T01	0
## Alignment 80: score=350.0 e_value=3.1e-16 N=8 At-Chr1&Ft-Ft3 minus
80- 0:	At-AT1G12860.1.TAIR10	Ft-FtPinG0009104300.01.T01	5e-12
80- 1:	At-AT1G12960.1.TAIR10	Ft-FtPinG0009109800.01.T01	1e-38
80- 2:	At-AT1G12970.1.TAIR10	Ft-FtPinG0009110300.01.T01	2e-111
80- 3:	At-AT1G13020.1.TAIR10	Ft-FtPinG0009111200.01.T01	1e-113
80- 4:	At-AT1G13030.1.TAIR10	Ft-FtPinG0009111300.01.T01	9e-106
80- 5:	At-AT1G13140.1.TAIR10	Ft-FtPinG0009112200.01.T01	0
80- 6:	At-AT1G13180.1.TAIR10	Ft-FtPinG0009112700.01.T01	0
80- 7:	At-AT1G13195.1.TAIR10	Ft-FtPinG0009115800.01.T01	1e-93
## Alignment 81: score=349.0 e_value=3.8e-14 N=8 At-Chr1&Ft-Ft3 minus
81- 0:	At-AT1G10350.1.TAIR10	Ft-FtPinG0004807600.01.T01	1e-71
81- 1:	At-AT1G10385.1.TAIR10	Ft-FtPinG0004808500.01.T01	0
81- 2:	At-AT1G10430.1.TAIR10	Ft-FtPinG0004812800.01.T01	0
81- 3:	At-AT1G10520.1.TAIR10	Ft-FtPinG0009101700.01.T01	0
81- 4:	At-AT1G10522.1.TAIR10	Ft-FtPinG0009101900.01.T01	4e-68
81- 5:	At-AT1G10590.3.TAIR10	Ft-FtPinG0009104500.01.T01	7e-73
81- 6:	At-AT1G10670.3.TAIR10	Ft-FtPinG0009107100.01.T01	0
81- 7:	At-AT1G10740.1.TAIR10	Ft-FtPinG0009109100.01.T01	0
## Alignment 82: score=307.0 e_value=1.1e-11 N=7 At-Chr1&Ft-Ft3 minus
82- 0:	At-AT1G32350.1.TAIR10	Ft-FtPinG0004434100.01.T01	7e-150
82- 1:	At-AT1G32400.1.TAIR10	Ft-FtPinG0004429300.01.T01	4e-21
82- 2:	At-AT1G32520.1.TAIR10	Ft-FtPinG0004426100.01.T01	2e-117
82- 3:	At-AT1G32540.1.TAIR10	Ft-FtPinG0004425600.01.T01	8e-77
82- 4:	At-AT1G32560.1.TAIR10	Ft-FtPinG0004425400.01.T01	5e-25
82- 5:	At-AT1G32610.1.TAIR10	Ft-FtPinG0004423300.01.T01	6e-11
82- 6:	At-AT1G32700.1.TAIR10	Ft-FtPinG0004423200.01.T01	1e-92
## Alignment 83: score=298.0 e_value=1.4e-11 N=7 At-Chr1&Ft-Ft3 minus
83- 0:	At-AT1G21200.1.TAIR10	Ft-FtPinG0002123600.01.T01	2e-108
83- 1:	At-AT1G21320.1.TAIR10	Ft-FtPinG0002126400.01.T01	6e-18
83- 2:	At-AT1G21340.1.TAIR10	Ft-FtPinG0002126900.01.T01	2e-34
83- 3:	At-AT1G21360.1.TAIR10	Ft-FtPinG0002127100.01.T01	4e-79
83- 4:	At-AT1G21600.1.TAIR10	Ft-FtPinG0002127400.01.T01	2e-157
83- 5:	At-AT1G21670.1.TAIR10	Ft-FtPinG0002127700.01.T01	0
83- 6:	At-AT1G21740.1.TAIR10	Ft-FtPinG0002129300.01.T01	3e-152
## Alignment 84: score=268.0 e_value=3.2e-08 N=6 At-Chr1&Ft-Ft3 minus
84- 0:	At-AT1G49270.1.TAIR10	Ft-FtPinG0004394400.01.T01	4e-177
84- 1:	At-AT1G49320.1.TAIR10	Ft-FtPinG0004393200.01.T01	3e-55
84- 2:	At-AT1G49350.1.TAIR10	Ft-FtPinG0004392800.01.T01	1e-109
84- 3:	At-AT1G49430.1.TAIR10	Ft-FtPinG0004388100.01.T01	0
84- 4:	At-AT1G49450.1.TAIR10	Ft-FtPinG0004387600.01.T01	3e-154
84- 5:	At-AT1G49490.1.TAIR10	Ft-FtPinG0004385500.01.T01	9e-123
## Alignment 85: score=265.0 e_value=1.5e-08 N=6 At-Chr1&Ft-Ft3 minus
85- 0:	At-AT1G80070.1.TAIR10	Ft-FtPinG0008567800.01.T01	0
85- 1:	At-AT1G80120.1.TAIR10	Ft-FtPinG0008567600.01.T01	2e-60
85- 2:	At-AT1G80160.1.TAIR10	Ft-FtPinG0008565400.01.T01	4e-91
85- 3:	At-AT1G80280.1.TAIR10	Ft-FtPinG0008562900.01.T01	0
85- 4:	At-AT1G80360.1.TAIR10	Ft-FtPinG0008136600.01.T01	2e-88
85- 5:	At-AT1G80440.1.TAIR10	Ft-FtPinG0005141600.01.T01	2e-101
## Alignment 86: score=262.0 e_value=1.3e-09 N=6 At-Chr1&Ft-Ft3 minus
86- 0:	At-AT1G02370.1.TAIR10	Ft-FtPinG0000404800.01.T01	1e-127
86- 1:	At-AT1G02400.1.TAIR10	Ft-FtPinG0000400800.01.T01	3e-119
86- 2:	At-AT1G02420.1.TAIR10	Ft-FtPinG0000400600.01.T01	0
86- 3:	At-AT1G02470.2.TAIR10	Ft-FtPinG0000398700.01.T01	2e-54
86- 4:	At-AT1G02510.1.TAIR10	Ft-FtPinG0005570900.01.T01	3e-64
86- 5:	At-AT1G02520.1.TAIR10	Ft-FtPinG0005570600.01.T01	0
## Alignment 87: score=260.0 e_value=3.1e-09 N=6 At-Chr1&Ft-Ft3 minus
87- 0:	At-AT1G23520.1.TAIR10	Ft-FtPinG0009103800.01.T01	3e-54
87- 1:	At-AT1G23750.1.TAIR10	Ft-FtPinG0009104500.01.T01	1e-77
87- 2:	At-AT1G23760.1.TAIR10	Ft-FtPinG0009104700.01.T01	0
87- 3:	At-AT1G23820.1.TAIR10	Ft-FtPinG0009105700.01.T01	0
87- 4:	At-AT1G23860.1.TAIR10	Ft-FtPinG0009106400.01.T03	1e-52
87- 5:	At-AT1G23980.1.TAIR10	Ft-FtPinG0009106700.01.T01	3e-81
## Alignment 88: score=626.0 e_value=7e-38 N=14 At-Chr1&Ft-Ft5 plus
88- 0:	At-AT1G11530.1.TAIR10	Ft-FtPinG0006363800.01.T01	4e-55
88- 1:	At-AT1G11630.1.TAIR10	Ft-FtPinG0002408600.01.T01	3e-141
88- 2:	At-AT1G11650.2.TAIR10	Ft-FtPinG0002409300.01.T01	1e-137
88- 3:	At-AT1G11700.1.TAIR10	Ft-FtPinG0006206800.01.T01	8e-49
88- 4:	At-AT1G11740.1.TAIR10	Ft-FtPinG0006205100.01.T01	0
88- 5:	At-AT1G11820.2.TAIR10	Ft-FtPinG0006204400.01.T01	0
88- 6:	At-AT1G11860.1.TAIR10	Ft-FtPinG0006203600.01.T01	0
88- 7:	At-AT1G11905.1.TAIR10	Ft-FtPinG0006203200.01.T02	3e-54
88- 8:	At-AT1G11915.1.TAIR10	Ft-FtPinG0006201200.01.T01	2e-125
88- 9:	At-AT1G11925.1.TAIR10	Ft-FtPinG0006200900.01.T01	8e-38
88- 10:	At-AT1G11930.1.TAIR10	Ft-FtPinG0006200600.01.T01	1e-135
88- 11:	At-AT1G11940.1.TAIR10	Ft-FtPinG0006200100.01.T01	2e-150
88- 12:	At-AT1G11950.1.TAIR10	Ft-FtPinG0006199500.01.T02	0
88- 13:	At-AT1G11960.1.TAIR10	Ft-FtPinG0006199100.01.T01	0
## Alignment 89: score=606.0 e_value=1.4e-36 N=14 At-Chr1&Ft-Ft5 plus
89- 0:	At-AT1G61680.1.TAIR10	Ft-FtPinG0006470900.01.T01	9e-14
89- 1:	At-AT1G61780.1.TAIR10	Ft-FtPinG0002406600.01.T01	1e-58
89- 2:	At-AT1G61800.1.TAIR10	Ft-FtPinG0002407900.01.T01	0
89- 3:	At-AT1G61850.1.TAIR10	Ft-FtPinG0002408100.01.T01	0
89- 4:	At-AT1G61870.1.TAIR10	Ft-FtPinG0002408600.01.T01	2e-163
89- 5:	At-AT1G61930.1.TAIR10	Ft-FtPinG0006206800.01.T01	1e-43
89- 6:	At-AT1G62040.2.TAIR10	Ft-FtPinG0006205600.01.T01	2e-72
89- 7:	At-AT1G62050.1.TAIR10	Ft-FtPinG0006205100.01.T01	0
89- 8:	At-AT1G62180.1.TAIR10	Ft-FtPinG0006204600.01.T01	0
89- 9:	At-AT1G62262.1.TAIR10	Ft-FtPinG0006202900.01.T01	1e-126
89- 10:	At-AT1G62300.1.TAIR10	Ft-FtPinG0006202300.01.T01	6e-78
89- 11:	At-AT1G62305.1.TAIR10	Ft-FtPinG0006200100.01.T01	8e-141
89- 12:	At-AT1G62310.1.TAIR10	Ft-FtPinG0006199500.01.T02	0
89- 13:	At-AT1G62320.1.TAIR10	Ft-FtPinG0006199100.01.T01	0
## Alignment 90: score=534.0 e_value=1.6e-27 N=12 At-Chr1&Ft-Ft5 plus
90- 0:	At-AT1G59980.1.TAIR10	Ft-FtPinG0000443700.01.T01	7e-180
90- 1:	At-AT1G60010.1.TAIR10	Ft-FtPinG0000448000.01.T01	2e-64
90- 2:	At-AT1G60050.1.TAIR10	Ft-FtPinG0000451200.01.T01	4e-89
90- 3:	At-AT1G60060.1.TAIR10	Ft-FtPinG0000453100.01.T01	7e-142
90- 4:	At-AT1G60070.2.TAIR10	Ft-FtPinG0000454400.01.T01	0
90- 5:	At-AT1G60160.1.TAIR10	Ft-FtPinG0000458000.01.T01	0
90- 6:	At-AT1G60420.1.TAIR10	Ft-FtPinG0000459300.01.T01	0
90- 7:	At-AT1G60440.1.TAIR10	Ft-FtPinG0000460600.01.T01	4e-159
90- 8:	At-AT1G60590.1.TAIR10	Ft-FtPinG0000462300.01.T01	0
90- 9:	At-AT1G60610.1.TAIR10	Ft-FtPinG0000463600.01.T01	2e-116
90- 10:	At-AT1G60770.1.TAIR10	Ft-FtPinG0000467200.01.T01	0
90- 11:	At-AT1G60780.1.TAIR10	Ft-FtPinG0000467400.01.T01	0
## Alignment 91: score=502.0 e_value=1.9e-22 N=11 At-Chr1&Ft-Ft5 plus
91- 0:	At-AT1G70210.1.TAIR10	Ft-FtPinG0000446700.01.T01	3e-108
91- 1:	At-AT1G70260.1.TAIR10	Ft-FtPinG0000451200.01.T01	3e-98
91- 2:	At-AT1G70300.1.TAIR10	Ft-FtPinG0000457000.01.T01	0
91- 3:	At-AT1G70330.1.TAIR10	Ft-FtPinG0000458100.01.T01	0
91- 4:	At-AT1G70410.2.TAIR10	Ft-FtPinG0000459200.01.T01	4e-116
91- 5:	At-AT1G70480.2.TAIR10	Ft-FtPinG0000459500.01.T01	7e-121
91- 6:	At-AT1G70500.1.TAIR10	Ft-FtPinG0000462100.01.T01	0
91- 7:	At-AT1G70510.1.TAIR10	Ft-FtPinG0000464900.01.T01	7e-120
91- 8:	At-AT1G70550.1.TAIR10	Ft-FtPinG0000466900.01.T01	0
91- 9:	At-AT1G70610.1.TAIR10	Ft-FtPinG0000468900.01.T01	0
91- 10:	At-AT1G70630.1.TAIR10	Ft-FtPinG0000469900.01.T01	0
## Alignment 92: score=409.0 e_value=2.3e-16 N=9 At-Chr1&Ft-Ft5 plus
92- 0:	At-AT1G22970.1.TAIR10	Ft-FtPinG0003114100.01.T01	3e-100
92- 1:	At-AT1G23030.1.TAIR10	Ft-FtPinG0009308300.01.T01	0
92- 2:	At-AT1G23060.1.TAIR10	Ft-FtPinG0009310200.01.T01	3e-31
92- 3:	At-AT1G23080.1.TAIR10	Ft-FtPinG0009310400.01.T01	1e-145
92- 4:	At-AT1G23120.1.TAIR10	Ft-FtPinG0009313300.01.T01	2e-13
92- 5:	At-AT1G23150.1.TAIR10	Ft-FtPinG0009313500.01.T01	7e-44
92- 6:	At-AT1G23170.2.TAIR10	Ft-FtPinG0008955100.01.T01	2e-105
92- 7:	At-AT1G23205.1.TAIR10	Ft-FtPinG0008956800.01.T01	2e-48
92- 8:	At-AT1G23240.1.TAIR10	Ft-FtPinG0008958400.01.T01	2e-35
## Alignment 93: score=302.0 e_value=3.6e-13 N=7 At-Chr1&Ft-Ft5 plus
93- 0:	At-AT1G54450.1.TAIR10	Ft-FtPinG0005741000.01.T01	0
93- 1:	At-AT1G54460.1.TAIR10	Ft-FtPinG0005743500.01.T01	3e-53
93- 2:	At-AT1G54510.1.TAIR10	Ft-FtPinG0005746200.01.T01	0
93- 3:	At-AT1G54520.1.TAIR10	Ft-FtPinG0005747000.01.T01	7e-136
93- 4:	At-AT1G54680.1.TAIR10	Ft-FtPinG0004643700.01.T01	3e-17
93- 5:	At-AT1G54690.1.TAIR10	Ft-FtPinG0004644000.01.T01	1e-87
93- 6:	At-AT1G54730.2.TAIR10	Ft-FtPinG0004644100.01.T02	7e-89
## Alignment 94: score=292.0 e_value=3.7e-09 N=6 At-Chr1&Ft-Ft5 plus
94- 0:	At-AT1G68290.1.TAIR10	Ft-FtPinG0003121000.01.T01	1e-142
94- 1:	At-AT1G68300.1.TAIR10	Ft-FtPinG0003120700.01.T01	1e-28
94- 2:	At-AT1G68320.1.TAIR10	Ft-FtPinG0003119800.01.T01	9e-85
94- 3:	At-AT1G68340.1.TAIR10	Ft-FtPinG0003119400.01.T01	5e-13
94- 4:	At-AT1G68370.1.TAIR10	Ft-FtPinG0003118700.01.T01	8e-158
94- 5:	At-AT1G68400.1.TAIR10	Ft-FtPinG0003118500.01.T01	8e-136
## Alignment 95: score=291.0 e_value=2.5e-08 N=6 At-Chr1&Ft-Ft5 plus
95- 0:	At-AT1G59830.1.TAIR10	Ft-FtPinG0004659700.01.T01	0
95- 1:	At-AT1G59840.1.TAIR10	Ft-FtPinG0004660100.01.T01	6e-120
95- 2:	At-AT1G59850.1.TAIR10	Ft-FtPinG0004660400.01.T01	3e-16
95- 3:	At-AT1G59890.2.TAIR10	Ft-FtPinG0004660500.01.T01	0
95- 4:	At-AT1G59910.1.TAIR10	Ft-FtPinG0004661000.01.T01	2e-144
95- 5:	At-AT1G59940.1.TAIR10	Ft-FtPinG0004661400.01.T01	2e-68
## Alignment 96: score=287.0 e_value=5e-09 N=6 At-Chr1&Ft-Ft5 plus
96- 0:	At-AT1G78040.1.TAIR10	Ft-FtPinG0007151500.01.T01	4e-32
96- 1:	At-AT1G78050.1.TAIR10	Ft-FtPinG0009558500.01.T01	3e-162
96- 2:	At-AT1G78080.1.TAIR10	Ft-FtPinG0009559900.01.T01	5e-83
96- 3:	At-AT1G78090.1.TAIR10	Ft-FtPinG0009561500.01.T01	3e-154
96- 4:	At-AT1G78140.1.TAIR10	Ft-FtPinG0009562200.01.T01	4e-137
96- 5:	At-AT1G78150.3.TAIR10	Ft-FtPinG0009562300.01.T01	6e-102
## Alignment 97: score=281.0 e_value=1.9e-10 N=6 At-Chr1&Ft-Ft5 plus
97- 0:	At-AT1G55265.1.TAIR10	Ft-FtPinG0004648700.01.T01	5e-34
97- 1:	At-AT1G55270.1.TAIR10	Ft-FtPinG0004649000.01.T01	0
97- 2:	At-AT1G55310.3.TAIR10	Ft-FtPinG0004649800.01.T01	1e-71
97- 3:	At-AT1G55350.5.TAIR10	Ft-FtPinG0004651200.01.T01	0
97- 4:	At-AT1G55360.1.TAIR10	Ft-FtPinG0004651400.01.T01	0
97- 5:	At-AT1G55500.2.TAIR10	Ft-FtPinG0004652100.01.T01	0
## Alignment 98: score=273.0 e_value=2.6e-08 N=6 At-Chr1&Ft-Ft5 plus
98- 0:	At-AT1G01560.2.TAIR10	Ft-FtPinG0002526000.01.T01	0
98- 1:	At-AT1G01580.1.TAIR10	Ft-FtPinG0002526200.01.T01	2e-121
98- 2:	At-AT1G01650.1.TAIR10	Ft-FtPinG0002529400.01.T01	2e-98
98- 3:	At-AT1G01660.1.TAIR10	Ft-FtPinG0002529600.01.T01	5e-12
98- 4:	At-AT1G01750.1.TAIR10	Ft-FtPinG0002530700.01.T02	6e-80
98- 5:	At-AT1G01820.1.TAIR10	Ft-FtPinG0002531500.01.T01	6e-149
## Alignment 99: score=268.0 e_value=1.7e-09 N=6 At-Chr1&Ft-Ft5 plus
99- 0:	At-AT1G12950.1.TAIR10	Ft-FtPinG0000467800.01.T01	0
99- 1:	At-AT1G13000.1.TAIR10	Ft-FtPinG0000470600.01.T01	5e-176
99- 2:	At-AT1G13040.1.TAIR10	Ft-FtPinG0000473100.01.T01	0
99- 3:	At-AT1G13050.1.TAIR10	Ft-FtPinG0000473300.01.T01	2e-32
99- 4:	At-AT1G13060.2.TAIR10	Ft-FtPinG0000480600.01.T01	1e-12
99- 5:	At-AT1G13170.2.TAIR10	Ft-FtPinG0000483000.01.T01	0
## Alignment 100: score=266.0 e_value=2.6e-10 N=6 At-Chr1&Ft-Ft5 plus
100- 0:	At-AT1G10522.1.TAIR10	Ft-FtPinG0000447700.01.T01	1e-35
100- 1:	At-AT1G10530.1.TAIR10	Ft-FtPinG0000448000.01.T01	4e-52
100- 2:	At-AT1G10640.1.TAIR10	Ft-FtPinG0000462300.01.T01	0
100- 3:	At-AT1G10650.1.TAIR10	Ft-FtPinG0000463600.01.T01	8e-132
100- 4:	At-AT1G10657.1.TAIR10	Ft-FtPinG0000463900.01.T01	5e-25
100- 5:	At-AT1G10730.1.TAIR10	Ft-FtPinG0000467400.01.T01	0
## Alignment 101: score=1200.0 e_value=6.6e-84 N=26 At-Chr1&Ft-Ft5 minus
101- 0:	At-AT1G13640.1.TAIR10	Ft-FtPinG0003138800.01.T01	0
101- 1:	At-AT1G13690.1.TAIR10	Ft-FtPinG0003141500.01.T01	2e-95
101- 2:	At-AT1G13700.1.TAIR10	Ft-FtPinG0003141800.01.T01	9e-124
101- 3:	At-AT1G13740.1.TAIR10	Ft-FtPinG0003141900.01.T01	8e-66
101- 4:	At-AT1G13750.1.TAIR10	Ft-FtPinG0003142600.01.T01	0
101- 5:	At-AT1G13830.1.TAIR10	Ft-FtPinG0003143000.01.T01	8e-34
101- 6:	At-AT1G13860.1.TAIR10	Ft-FtPinG0003143600.01.T01	0
101- 7:	At-AT1G13890.1.TAIR10	Ft-FtPinG0004684800.01.T01	3e-87
101- 8:	At-AT1G13920.1.TAIR10	Ft-FtPinG0004684600.01.T01	8e-22
101- 9:	At-AT1G13930.1.TAIR10	Ft-FtPinG0004684100.01.T01	1e-18
101- 10:	At-AT1G13940.1.TAIR10	Ft-FtPinG0004683700.01.T01	2e-39
101- 11:	At-AT1G13950.1.TAIR10	Ft-FtPinG0004683000.01.T01	4e-99
101- 12:	At-AT1G13960.1.TAIR10	Ft-FtPinG0004682800.01.T01	1e-141
101- 13:	At-AT1G13970.1.TAIR10	Ft-FtPinG0004682500.01.T01	4e-123
101- 14:	At-AT1G14000.1.TAIR10	Ft-FtPinG0004680800.01.T02	0
101- 15:	At-AT1G14010.1.TAIR10	Ft-FtPinG0004680500.01.T01	5e-88
101- 16:	At-AT1G14200.1.TAIR10	Ft-FtPinG0004677900.01.T01	6e-21
101- 17:	At-AT1G14260.1.TAIR10	Ft-FtPinG0004677000.01.T02	8e-78
101- 18:	At-AT1G14280.1.TAIR10	Ft-FtPinG0004676200.01.T01	3e-38
101- 19:	At-AT1G14310.1.TAIR10	Ft-FtPinG0004674800.01.T01	2e-127
101- 20:	At-AT1G14330.1.TAIR10	Ft-FtPinG0004668900.01.T01	0
101- 21:	At-AT1G14350.1.TAIR10	Ft-FtPinG0004667800.01.T01	7e-13
101- 22:	At-AT1G14370.1.TAIR10	Ft-FtPinG0004667200.01.T01	1e-56
101- 23:	At-AT1G14390.1.TAIR10	Ft-FtPinG0004667000.01.T01	3e-54
101- 24:	At-AT1G14400.1.TAIR10	Ft-FtPinG0004666700.01.T01	9e-51
101- 25:	At-AT1G14420.1.TAIR10	Ft-FtPinG0004666500.01.T01	2e-12
## Alignment 102: score=1122.0 e_value=3.3e-76 N=25 At-Chr1&Ft-Ft5 minus
102- 0:	At-AT1G26190.1.TAIR10	Ft-FtPinG0003136900.01.T02	0
102- 1:	At-AT1G26270.1.TAIR10	Ft-FtPinG0003138800.01.T01	0
102- 2:	At-AT1G26450.1.TAIR10	Ft-FtPinG0003143000.01.T01	8e-32
102- 3:	At-AT1G26460.1.TAIR10	Ft-FtPinG0003143100.01.T01	0
102- 4:	At-AT1G26480.1.TAIR10	Ft-FtPinG0003143400.01.T01	2e-158
102- 5:	At-AT1G26610.1.TAIR10	Ft-FtPinG0004685000.01.T01	8e-12
102- 6:	At-AT1G26620.1.TAIR10	Ft-FtPinG0004683700.01.T01	2e-35
102- 7:	At-AT1G26630.1.TAIR10	Ft-FtPinG0004683000.01.T01	5e-96
102- 8:	At-AT1G26660.2.TAIR10	Ft-FtPinG0004682000.01.T01	7e-35
102- 9:	At-AT1G26670.1.TAIR10	Ft-FtPinG0004681000.01.T01	6e-106
102- 10:	At-AT1G26690.1.TAIR10	Ft-FtPinG0004680500.01.T01	2e-86
102- 11:	At-AT1G26761.1.TAIR10	Ft-FtPinG0004680200.01.T02	2e-108
102- 12:	At-AT1G26770.2.TAIR10	Ft-FtPinG0004679600.01.T01	3e-132
102- 13:	At-AT1G26780.2.TAIR10	Ft-FtPinG0004679200.01.T01	7e-26
102- 14:	At-AT1G26800.1.TAIR10	Ft-FtPinG0004677900.01.T01	9e-31
102- 15:	At-AT1G26840.1.TAIR10	Ft-FtPinG0004675900.01.T01	9e-129
102- 16:	At-AT1G26920.1.TAIR10	Ft-FtPinG0004669500.01.T01	1e-29
102- 17:	At-AT1G26930.1.TAIR10	Ft-FtPinG0004668900.01.T01	8e-167
102- 18:	At-AT1G26945.1.TAIR10	Ft-FtPinG0004668800.01.T01	4e-33
102- 19:	At-AT1G26960.1.TAIR10	Ft-FtPinG0004668400.01.T02	1e-75
102- 20:	At-AT1G26970.1.TAIR10	Ft-FtPinG0004667200.01.T01	3e-54
102- 21:	At-AT1G27050.1.TAIR10	Ft-FtPinG0004665800.01.T01	2e-42
102- 22:	At-AT1G27070.1.TAIR10	Ft-FtPinG0004665500.01.T01	4e-92
102- 23:	At-AT1G27100.1.TAIR10	Ft-FtPinG0004662300.01.T01	7e-43
102- 24:	At-AT1G27210.1.TAIR10	Ft-FtPinG0004660400.01.T01	1e-66
## Alignment 103: score=1064.0 e_value=3.2e-72 N=24 At-Chr1&Ft-Ft5 minus
103- 0:	At-AT1G69040.2.TAIR10	Ft-FtPinG0003139300.01.T01	0
103- 1:	At-AT1G69160.1.TAIR10	Ft-FtPinG0003141300.01.T01	7e-14
103- 2:	At-AT1G69260.1.TAIR10	Ft-FtPinG0003141900.01.T01	5e-66
103- 3:	At-AT1G69295.1.TAIR10	Ft-FtPinG0003143000.01.T01	7e-36
103- 4:	At-AT1G69325.1.TAIR10	Ft-FtPinG0004684600.01.T01	6e-15
103- 5:	At-AT1G69330.1.TAIR10	Ft-FtPinG0004684300.01.T01	1e-95
103- 6:	At-AT1G69360.1.TAIR10	Ft-FtPinG0004683700.01.T01	6e-51
103- 7:	At-AT1G69380.1.TAIR10	Ft-FtPinG0004683300.01.T01	1e-123
103- 8:	At-AT1G69400.1.TAIR10	Ft-FtPinG0004683200.01.T01	2e-103
103- 9:	At-AT1G69410.1.TAIR10	Ft-FtPinG0004683000.01.T01	2e-98
103- 10:	At-AT1G69450.1.TAIR10	Ft-FtPinG0004681700.01.T01	0
103- 11:	At-AT1G69460.1.TAIR10	Ft-FtPinG0004680500.01.T01	2e-87
103- 12:	At-AT1G69530.3.TAIR10	Ft-FtPinG0004679600.01.T01	5e-133
103- 13:	At-AT1G69560.1.TAIR10	Ft-FtPinG0004679200.01.T01	9e-31
103- 14:	At-AT1G69580.2.TAIR10	Ft-FtPinG0004678400.01.T01	2e-59
103- 15:	At-AT1G69670.1.TAIR10	Ft-FtPinG0004674300.01.T01	0
103- 16:	At-AT1G69760.1.TAIR10	Ft-FtPinG0004669500.01.T01	5e-28
103- 17:	At-AT1G69780.1.TAIR10	Ft-FtPinG0004668400.01.T02	5e-87
103- 18:	At-AT1G69790.1.TAIR10	Ft-FtPinG0004667200.01.T01	5e-53
103- 19:	At-AT1G69830.1.TAIR10	Ft-FtPinG0004666300.01.T01	2e-45
103- 20:	At-AT1G69880.1.TAIR10	Ft-FtPinG0004663000.01.T01	3e-34
103- 21:	At-AT1G69890.1.TAIR10	Ft-FtPinG0004662300.01.T01	2e-35
103- 22:	At-AT1G70060.1.TAIR10	Ft-FtPinG0004660500.01.T01	0
103- 23:	At-AT1G70170.1.TAIR10	Ft-FtPinG0004657000.01.T01	5e-125
## Alignment 104: score=830.0 e_value=1.4e-49 N=18 At-Chr1&Ft-Ft5 minus
104- 0:	At-AT1G67320.3.TAIR10	Ft-FtPinG0000496200.01.T01	0
104- 1:	At-AT1G67325.2.TAIR10	Ft-FtPinG0000492900.01.T01	2e-114
104- 2:	At-AT1G67340.1.TAIR10	Ft-FtPinG0000492800.01.T01	7e-157
104- 3:	At-AT1G67410.1.TAIR10	Ft-FtPinG0000492500.01.T01	5e-154
104- 4:	At-AT1G67430.1.TAIR10	Ft-FtPinG0000492200.01.T01	4e-109
104- 5:	At-AT1G67510.1.TAIR10	Ft-FtPinG0000491900.01.T01	0
104- 6:	At-AT1G67550.1.TAIR10	Ft-FtPinG0000488200.01.T02	0
104- 7:	At-AT1G67560.1.TAIR10	Ft-FtPinG0000487200.01.T01	0
104- 8:	At-AT1G67600.1.TAIR10	Ft-FtPinG0000486900.01.T01	5e-80
104- 9:	At-AT1G67710.1.TAIR10	Ft-FtPinG0000484500.01.T01	4e-131
104- 10:	At-AT1G67750.1.TAIR10	Ft-FtPinG0000484200.01.T01	0
104- 11:	At-AT1G67785.1.TAIR10	Ft-FtPinG0000482700.01.T01	5e-28
104- 12:	At-AT1G67790.1.TAIR10	Ft-FtPinG0000481500.01.T01	9e-46
104- 13:	At-AT1G67800.2.TAIR10	Ft-FtPinG0000480300.01.T01	0
104- 14:	At-AT1G67810.1.TAIR10	Ft-FtPinG0000472200.01.T01	4e-59
104- 15:	At-AT1G67830.1.TAIR10	Ft-FtPinG0000470800.01.T01	3e-170
104- 16:	At-AT1G67850.1.TAIR10	Ft-FtPinG0000470600.01.T01	0
104- 17:	At-AT1G67856.1.TAIR10	Ft-FtPinG0000470400.01.T01	2e-38
## Alignment 105: score=704.0 e_value=2.7e-35 N=15 At-Chr1&Ft-Ft5 minus
105- 0:	At-AT1G70670.1.TAIR10	Ft-FtPinG0008958400.01.T01	1e-41
105- 1:	At-AT1G70700.1.TAIR10	Ft-FtPinG0008957700.01.T01	9e-15
105- 2:	At-AT1G70720.1.TAIR10	Ft-FtPinG0008956800.01.T01	2e-48
105- 3:	At-AT1G70740.1.TAIR10	Ft-FtPinG0008956300.01.T01	4e-170
105- 4:	At-AT1G70750.1.TAIR10	Ft-FtPinG0008955900.01.T01	1e-27
105- 5:	At-AT1G70770.1.TAIR10	Ft-FtPinG0008955100.01.T01	9e-102
105- 6:	At-AT1G70780.1.TAIR10	Ft-FtPinG0009313500.01.T01	3e-51
105- 7:	At-AT1G70830.1.TAIR10	Ft-FtPinG0009312900.01.T01	4e-31
105- 8:	At-AT1G70920.1.TAIR10	Ft-FtPinG0009310800.01.T01	8e-41
105- 9:	At-AT1G70940.1.TAIR10	Ft-FtPinG0009310400.01.T01	1e-141
105- 10:	At-AT1G70950.1.TAIR10	Ft-FtPinG0009310200.01.T01	1e-64
105- 11:	At-AT1G71015.1.TAIR10	Ft-FtPinG0009308500.01.T01	9e-43
105- 12:	At-AT1G71020.1.TAIR10	Ft-FtPinG0009308300.01.T01	0
105- 13:	At-AT1G71100.1.TAIR10	Ft-FtPinG0009307900.01.T01	1e-132
105- 14:	At-AT1G71150.1.TAIR10	Ft-FtPinG0003114100.01.T01	1e-91
## Alignment 106: score=474.0 e_value=9.8e-23 N=11 At-Chr1&Ft-Ft5 minus
106- 0:	At-AT1G23300.1.TAIR10	Ft-FtPinG0000467800.01.T01	0
106- 1:	At-AT1G23340.1.TAIR10	Ft-FtPinG0000466900.01.T01	0
106- 2:	At-AT1G23380.2.TAIR10	Ft-FtPinG0000464900.01.T01	2e-137
106- 3:	At-AT1G23390.1.TAIR10	Ft-FtPinG0000464300.01.T01	6e-68
106- 4:	At-AT1G23460.1.TAIR10	Ft-FtPinG0000462100.01.T01	0
106- 5:	At-AT1G23690.1.TAIR10	Ft-FtPinG0000459500.01.T01	1e-49
106- 6:	At-AT1G23730.1.TAIR10	Ft-FtPinG0000459200.01.T01	5e-116
106- 7:	At-AT1G23900.1.TAIR10	Ft-FtPinG0000454400.01.T01	0
106- 8:	At-AT1G23980.1.TAIR10	Ft-FtPinG0000454100.01.T02	3e-87
106- 9:	At-AT1G24020.1.TAIR10	Ft-FtPinG0000450900.01.T01	2e-60
106- 10:	At-AT1G24120.1.TAIR10	Ft-FtPinG0000443700.01.T01	0
## Alignment 107: score=372.0 e_value=4.6e-17 N=9 At-Chr1&Ft-Ft5 minus
107- 0:	At-AT1G14610.1.TAIR10	Ft-FtPinG0001334700.01.T01	0
107- 1:	At-AT1G14710.1.TAIR10	Ft-FtPinG0001333100.01.T01	9e-136
107- 2:	At-AT1G14790.1.TAIR10	Ft-FtPinG0008963400.01.T01	0
107- 3:	At-AT1G14830.1.TAIR10	Ft-FtPinG0008963200.01.T01	0
107- 4:	At-AT1G14860.1.TAIR10	Ft-FtPinG0008959000.01.T01	4e-15
107- 5:	At-AT1G14890.1.TAIR10	Ft-FtPinG0008956800.01.T01	1e-58
107- 6:	At-AT1G14910.1.TAIR10	Ft-FtPinG0008955700.01.T01	0
107- 7:	At-AT1G15000.1.TAIR10	Ft-FtPinG0009311400.01.T01	1e-179
107- 8:	At-AT1G15140.1.TAIR10	Ft-FtPinG0009307300.01.T01	5e-143
## Alignment 108: score=308.0 e_value=1.6e-13 N=8 At-Chr1&Ft-Ft5 minus
108- 0:	At-AT1G68670.1.TAIR10	Ft-FtPinG0007116300.01.T01	1e-95
108- 1:	At-AT1G68780.1.TAIR10	Ft-FtPinG0007115100.01.T01	1e-127
108- 2:	At-AT1G68920.1.TAIR10	Ft-FtPinG0005095500.01.T01	6e-65
108- 3:	At-AT1G68990.2.TAIR10	Ft-FtPinG0005095800.01.T01	0
108- 4:	At-AT1G69270.1.TAIR10	Ft-FtPinG0005096200.01.T01	2e-167
108- 5:	At-AT1G69430.1.TAIR10	Ft-FtPinG0005097300.01.T01	1e-128
108- 6:	At-AT1G69490.1.TAIR10	Ft-FtPinG0004997500.01.T01	1e-111
108- 7:	At-AT1G69600.1.TAIR10	Ft-FtPinG0004998300.01.T01	3e-24
## Alignment 109: score=293.0 e_value=1.6e-08 N=6 At-Chr1&Ft-Ft5 minus
109- 0:	At-AT1G27290.1.TAIR10	Ft-FtPinG0000494600.01.T01	2e-40
109- 1:	At-AT1G27310.1.TAIR10	Ft-FtPinG0000494100.01.T01	1e-65
109- 2:	At-AT1G27320.1.TAIR10	Ft-FtPinG0000493900.01.T01	0
109- 3:	At-AT1G27340.1.TAIR10	Ft-FtPinG0000493700.01.T01	0
109- 4:	At-AT1G27360.1.TAIR10	Ft-FtPinG0000493400.01.T01	3e-58
109- 5:	At-AT1G27400.1.TAIR10	Ft-FtPinG0000492200.01.T01	9e-111
## Alignment 110: score=275.0 e_value=3.2e-08 N=6 At-Chr1&Ft-Ft5 minus
110- 0:	At-AT1G30135.1.TAIR10	Ft-FtPinG0006744800.01.T01	2e-17
110- 1:	At-AT1G30270.1.TAIR10	Ft-FtPinG0006744200.01.T01	0
110- 2:	At-AT1G30300.1.TAIR10	Ft-FtPinG0006743400.01.T01	0
110- 3:	At-AT1G30360.1.TAIR10	Ft-FtPinG0006740600.01.T01	3e-26
110- 4:	At-AT1G30400.1.TAIR10	Ft-FtPinG0006739400.01.T01	0
110- 5:	At-AT1G30440.1.TAIR10	Ft-FtPinG0006739200.01.T01	0
## Alignment 111: score=630.0 e_value=2.5e-35 N=14 At-Chr1&Ft-Ft6 plus
111- 0:	At-AT1G80520.1.TAIR10	Ft-FtPinG0007818400.01.T01	3e-56
111- 1:	At-AT1G80530.1.TAIR10	Ft-FtPinG0007818100.01.T01	0
111- 2:	At-AT1G80560.1.TAIR10	Ft-FtPinG0006013000.01.T01	0
111- 3:	At-AT1G80570.2.TAIR10	Ft-FtPinG0006012000.01.T01	0
111- 4:	At-AT1G80660.1.TAIR10	Ft-FtPinG0006010700.01.T01	0
111- 5:	At-AT1G80690.1.TAIR10	Ft-FtPinG0006009100.01.T01	8e-85
111- 6:	At-AT1G80720.1.TAIR10	Ft-FtPinG0006009000.01.T01	3e-68
111- 7:	At-AT1G80760.1.TAIR10	Ft-FtPinG0006007500.01.T01	5e-148
111- 8:	At-AT1G80790.1.TAIR10	Ft-FtPinG0006006400.01.T01	2e-172
111- 9:	At-AT1G80820.1.TAIR10	Ft-FtPinG0008708600.01.T01	9e-169
111- 10:	At-AT1G80840.1.TAIR10	Ft-FtPinG0008708000.01.T01	1e-82
111- 11:	At-AT1G80850.1.TAIR10	Ft-FtPinG0008707300.01.T01	2e-101
111- 12:	At-AT1G80880.1.TAIR10	Ft-FtPinG0008705700.01.T01	2e-127
111- 13:	At-AT1G80940.1.TAIR10	Ft-FtPinG0008702800.01.T01	2e-76
## Alignment 112: score=540.0 e_value=1.7e-33 N=13 At-Chr1&Ft-Ft6 plus
112- 0:	At-AT1G51730.1.TAIR10	Ft-FtPinG0006102100.01.T01	6e-109
112- 1:	At-AT1G51770.1.TAIR10	Ft-FtPinG0006101700.01.T01	2e-164
112- 2:	At-AT1G51800.1.TAIR10	Ft-FtPinG0006100700.01.T01	1e-112
112- 3:	At-AT1G51950.1.TAIR10	Ft-FtPinG0002984800.01.T01	5e-71
112- 4:	At-AT1G52140.1.TAIR10	Ft-FtPinG0008396800.01.T01	3e-23
112- 5:	At-AT1G52155.1.TAIR10	Ft-FtPinG0008399700.01.T01	3e-167
112- 6:	At-AT1G52160.1.TAIR10	Ft-FtPinG0008400000.01.T01	0
112- 7:	At-AT1G52190.1.TAIR10	Ft-FtPinG0001054500.01.T01	0
112- 8:	At-AT1G52315.1.TAIR10	Ft-FtPinG0001061100.01.T01	5e-41
112- 9:	At-AT1G52330.2.TAIR10	Ft-FtPinG0005359000.01.T01	2e-40
112- 10:	At-AT1G52360.2.TAIR10	Ft-FtPinG0004305400.01.T04	0
112- 11:	At-AT1G52420.1.TAIR10	Ft-FtPinG0004305000.01.T01	0
112- 12:	At-AT1G52670.1.TAIR10	Ft-FtPinG0006751300.01.T01	2e-67
## Alignment 113: score=397.0 e_value=8.4e-19 N=9 At-Chr1&Ft-Ft6 plus
113- 0:	At-AT1G15760.1.TAIR10	Ft-FtPinG0007818400.01.T01	2e-60
113- 1:	At-AT1G15860.3.TAIR10	Ft-FtPinG0006009400.01.T01	8e-121
113- 2:	At-AT1G15870.1.TAIR10	Ft-FtPinG0006009000.01.T01	8e-70
113- 3:	At-AT1G15900.1.TAIR10	Ft-FtPinG0006007800.01.T01	6e-28
113- 4:	At-AT1G15910.1.TAIR10	Ft-FtPinG0006006400.01.T01	0
113- 5:	At-AT1G15930.1.TAIR10	Ft-FtPinG0008708800.01.T01	3e-65
113- 6:	At-AT1G15950.1.TAIR10	Ft-FtPinG0008708600.01.T01	0
113- 7:	At-AT1G15970.1.TAIR10	Ft-FtPinG0008707300.01.T01	9e-97
113- 8:	At-AT1G15980.1.TAIR10	Ft-FtPinG0008706600.01.T01	0
## Alignment 114: score=344.0 e_value=4.3e-16 N=8 At-Chr1&Ft-Ft6 plus
114- 0:	At-AT1G79770.1.TAIR10	Ft-FtPinG0008399100.01.T01	7e-44
114- 1:	At-AT1G79830.4.TAIR10	Ft-FtPinG0001055400.01.T01	0
114- 2:	At-AT1G79900.1.TAIR10	Ft-FtPinG0001060600.01.T01	7e-143
114- 3:	At-AT1G79910.1.TAIR10	Ft-FtPinG0001061100.01.T01	3e-58
114- 4:	At-AT1G79960.1.TAIR10	Ft-FtPinG0004306400.01.T01	5e-23
114- 5:	At-AT1G79990.1.TAIR10	Ft-FtPinG0004305400.01.T04	0
114- 6:	At-AT1G80000.1.TAIR10	Ft-FtPinG0004305200.01.T01	2e-99
114- 7:	At-AT1G80240.1.TAIR10	Ft-FtPinG0007550200.01.T01	9e-131
## Alignment 115: score=325.0 e_value=1.3e-12 N=7 At-Chr1&Ft-Ft6 plus
115- 0:	At-AT1G04260.1.TAIR10	Ft-FtPinG0009318100.01.T01	4e-40
115- 1:	At-AT1G04270.1.TAIR10	Ft-FtPinG0009317100.01.T02	6e-91
115- 2:	At-AT1G04300.3.TAIR10	Ft-FtPinG0009316500.01.T01	0
115- 3:	At-AT1G04350.1.TAIR10	Ft-FtPinG0003420700.01.T01	2e-91
115- 4:	At-AT1G04400.1.TAIR10	Ft-FtPinG0003425000.01.T01	0
115- 5:	At-AT1G04410.1.TAIR10	Ft-FtPinG0003425400.01.T01	0
115- 6:	At-AT1G04420.1.TAIR10	Ft-FtPinG0003426700.01.T01	0
## Alignment 116: score=293.0 e_value=6.7e-08 N=6 At-Chr1&Ft-Ft6 plus
116- 0:	At-AT1G16490.1.TAIR10	Ft-FtPinG0007044900.01.T01	1e-69
116- 1:	At-AT1G16500.1.TAIR10	Ft-FtPinG0007044500.01.T01	4e-33
116- 2:	At-AT1G16510.1.TAIR10	Ft-FtPinG0007044300.01.T01	3e-40
116- 3:	At-AT1G16520.1.TAIR10	Ft-FtPinG0007043000.01.T01	2e-117
116- 4:	At-AT1G16530.1.TAIR10	Ft-FtPinG0007042500.01.T01	2e-59
116- 5:	At-AT1G16560.1.TAIR10	Ft-FtPinG0007041800.01.T01	5e-168
## Alignment 117: score=560.0 e_value=1e-29 N=13 At-Chr1&Ft-Ft6 minus
117- 0:	At-AT1G01060.1.TAIR10	Ft-FtPinG0000335900.01.T01	2e-93
117- 1:	At-AT1G01160.2.TAIR10	Ft-FtPinG0000334600.01.T01	3e-28
117- 2:	At-AT1G01190.1.TAIR10	Ft-FtPinG0000332200.01.T01	0
117- 3:	At-AT1G01225.1.TAIR10	Ft-FtPinG0000330800.01.T01	6e-52
117- 4:	At-AT1G01260.1.TAIR10	Ft-FtPinG0000329800.01.T01	1e-177
117- 5:	At-AT1G01390.1.TAIR10	Ft-FtPinG0000354100.01.T01	1e-134
117- 6:	At-AT1G01540.2.TAIR10	Ft-FtPinG0000348200.01.T01	0
117- 7:	At-AT1G01570.1.TAIR10	Ft-FtPinG0000348000.01.T01	7e-146
117- 8:	At-AT1G01610.1.TAIR10	Ft-FtPinG0000346100.01.T01	0
117- 9:	At-AT1G01650.1.TAIR10	Ft-FtPinG0000345500.01.T01	0
117- 10:	At-AT1G01780.1.TAIR10	Ft-FtPinG0005304800.01.T01	1e-94
117- 11:	At-AT1G01820.1.TAIR10	Ft-FtPinG0003472800.01.T01	7e-130
117- 12:	At-AT1G01910.1.TAIR10	Ft-FtPinG0003472200.01.T01	0
## Alignment 118: score=422.0 e_value=1.1e-18 N=9 At-Chr1&Ft-Ft6 minus
118- 0:	At-AT1G71865.1.TAIR10	Ft-FtPinG0000342700.01.T01	2e-25
118- 1:	At-AT1G71880.1.TAIR10	Ft-FtPinG0000342600.01.T01	0
118- 2:	At-AT1G71990.1.TAIR10	Ft-FtPinG0000341200.01.T01	0
118- 3:	At-AT1G72020.1.TAIR10	Ft-FtPinG0000340700.01.T01	3e-34
118- 4:	At-AT1G72040.1.TAIR10	Ft-FtPinG0000340000.01.T01	0
118- 5:	At-AT1G72100.1.TAIR10	Ft-FtPinG0000339800.01.T01	1e-81
118- 6:	At-AT1G72150.1.TAIR10	Ft-FtPinG0000339500.01.T01	2e-115
118- 7:	At-AT1G72170.1.TAIR10	Ft-FtPinG0000339400.01.T01	7e-32
118- 8:	At-AT1G72175.1.TAIR10	Ft-FtPinG0000339200.01.T01	1e-74
## Alignment 119: score=310.0 e_value=4.1e-11 N=7 At-Chr1&Ft-Ft6 minus
119- 0:	At-AT1G80080.1.TAIR10	Ft-FtPinG0006756500.01.T01	0
119- 1:	At-AT1G80100.1.TAIR10	Ft-FtPinG0006754600.01.T01	1e-58
119- 2:	At-AT1G80120.1.TAIR10	Ft-FtPinG0006754200.01.T01	3e-81
119- 3:	At-AT1G80160.1.TAIR10	Ft-FtPinG0006751800.01.T01	2e-89
119- 4:	At-AT1G80280.1.TAIR10	Ft-FtPinG0007551600.01.T02	0
119- 5:	At-AT1G80350.1.TAIR10	Ft-FtPinG0001848700.01.T01	0
119- 6:	At-AT1G80440.1.TAIR10	Ft-FtPinG0006368600.01.T01	9e-39
## Alignment 120: score=284.0 e_value=3.3e-10 N=6 At-Chr1&Ft-Ft6 minus
120- 0:	At-AT1G52570.1.TAIR10	Ft-FtPinG0006752300.01.T01	0
120- 1:	At-AT1G52600.1.TAIR10	Ft-FtPinG0006752200.01.T02	2e-110
120- 2:	At-AT1G52620.1.TAIR10	Ft-FtPinG0006752000.01.T01	0
120- 3:	At-AT1G52740.1.TAIR10	Ft-FtPinG0007551300.01.T01	5e-76
120- 4:	At-AT1G52750.1.TAIR10	Ft-FtPinG0007551600.01.T02	0
120- 5:	At-AT1G52770.1.TAIR10	Ft-FtPinG0001849600.01.T01	6e-162
## Alignment 121: score=283.0 e_value=1e-09 N=6 At-Chr1&Ft-Ft6 minus
121- 0:	At-AT1G04530.1.TAIR10	Ft-FtPinG0007592700.01.T01	4e-46
121- 1:	At-AT1G04550.2.TAIR10	Ft-FtPinG0007592600.01.T01	2e-53
121- 2:	At-AT1G04560.1.TAIR10	Ft-FtPinG0007592200.01.T01	2e-34
121- 3:	At-AT1G04570.1.TAIR10	Ft-FtPinG0007591300.01.T01	1e-55
121- 4:	At-AT1G04610.1.TAIR10	Ft-FtPinG0007588200.01.T01	0
121- 5:	At-AT1G04620.1.TAIR10	Ft-FtPinG0007587900.01.T01	0
## Alignment 122: score=277.0 e_value=4e-08 N=6 At-Chr1&Ft-Ft6 minus
122- 0:	At-AT1G22210.1.TAIR10	Ft-FtPinG0002061000.01.T01	1e-71
122- 1:	At-AT1G22270.1.TAIR10	Ft-FtPinG0002059100.01.T01	1e-53
122- 2:	At-AT1G22280.3.TAIR10	Ft-FtPinG0002058400.01.T01	1e-144
122- 3:	At-AT1G22340.1.TAIR10	Ft-FtPinG0002057100.01.T01	4e-172
122- 4:	At-AT1G22450.1.TAIR10	Ft-FtPinG0002055600.01.T01	6e-58
122- 5:	At-AT1G22490.1.TAIR10	Ft-FtPinG0002054100.01.T01	6e-72
## Alignment 123: score=272.0 e_value=2.5e-10 N=6 At-Chr1&Ft-Ft6 minus
123- 0:	At-AT1G78070.1.TAIR10	Ft-FtPinG0002062500.01.T01	4e-52
123- 1:	At-AT1G78090.1.TAIR10	Ft-FtPinG0002060800.01.T01	4e-127
123- 2:	At-AT1G78170.1.TAIR10	Ft-FtPinG0002059400.01.T01	6e-18
123- 3:	At-AT1G78190.1.TAIR10	Ft-FtPinG0002059100.01.T01	1e-63
123- 4:	At-AT1G78200.1.TAIR10	Ft-FtPinG0002058400.01.T01	3e-128
123- 5:	At-AT1G78300.1.TAIR10	Ft-FtPinG0002056000.01.T01	3e-60
## Alignment 124: score=267.0 e_value=3.2e-08 N=6 At-Chr1&Ft-Ft6 minus
124- 0:	At-AT1G15340.1.TAIR10	Ft-FtPinG0006753900.01.T01	1e-42
124- 1:	At-AT1G15380.1.TAIR10	Ft-FtPinG0006751800.01.T01	4e-88
124- 2:	At-AT1G15460.1.TAIR10	Ft-FtPinG0007551000.01.T01	0
124- 3:	At-AT1G15490.1.TAIR10	Ft-FtPinG0007551600.01.T02	0
124- 4:	At-AT1G15520.1.TAIR10	Ft-FtPinG0001849000.01.T01	0
124- 5:	At-AT1G15670.1.TAIR10	Ft-FtPinG0006368600.01.T01	2e-29
## Alignment 125: score=262.0 e_value=4.9e-08 N=6 At-Chr1&Ft-Ft6 minus
125- 0:	At-AT1G04680.1.TAIR10	Ft-FtPinG0005767700.01.T01	0
125- 1:	At-AT1G04690.1.TAIR10	Ft-FtPinG0005762900.01.T01	0
125- 2:	At-AT1G04750.1.TAIR10	Ft-FtPinG0006251900.01.T01	5e-125
125- 3:	At-AT1G04810.1.TAIR10	Ft-FtPinG0001132300.01.T01	0
125- 4:	At-AT1G04860.1.TAIR10	Ft-FtPinG0001134100.01.T01	3e-78
125- 5:	At-AT1G04910.1.TAIR10	Ft-FtPinG0001135200.01.T01	0
## Alignment 126: score=750.0 e_value=2.6e-41 N=16 At-Chr1&Ft-Ft8 plus
126- 0:	At-AT1G08970.1.TAIR10	Ft-FtPinG0002208200.01.T01	7e-81
126- 1:	At-AT1G09020.1.TAIR10	Ft-FtPinG0002205900.01.T01	0
126- 2:	At-AT1G09030.1.TAIR10	Ft-FtPinG0002205700.01.T01	2e-49
126- 3:	At-AT1G09040.1.TAIR10	Ft-FtPinG0002204800.01.T01	2e-26
126- 4:	At-AT1G09100.1.TAIR10	Ft-FtPinG0002200800.01.T01	2e-95
126- 5:	At-AT1G09140.1.TAIR10	Ft-FtPinG0002200500.01.T01	5e-13
126- 6:	At-AT1G09150.1.TAIR10	Ft-FtPinG0002199200.01.T01	6e-116
126- 7:	At-AT1G09170.1.TAIR10	Ft-FtPinG0002198400.01.T01	0
126- 8:	At-AT1G09190.1.TAIR10	Ft-FtPinG0002194000.01.T01	0
126- 9:	At-AT1G09210.1.TAIR10	Ft-FtPinG0002193700.01.T01	0
126- 10:	At-AT1G09240.1.TAIR10	Ft-FtPinG0002192800.01.T01	5e-136
126- 11:	At-AT1G09310.1.TAIR10	Ft-FtPinG0002190400.01.T01	6e-48
126- 12:	At-AT1G09320.1.TAIR10	Ft-FtPinG0002190100.01.T01	3e-77
126- 13:	At-AT1G09330.1.TAIR10	Ft-FtPinG0002189300.01.T01	4e-114
126- 14:	At-AT1G09350.1.TAIR10	Ft-FtPinG0002189200.01.T01	6e-168
126- 15:	At-AT1G09380.1.TAIR10	Ft-FtPinG0002188100.01.T01	1e-119
## Alignment 127: score=710.0 e_value=2.8e-43 N=17 At-Chr1&Ft-Ft8 plus
127- 0:	At-AT1G07150.1.TAIR10	Ft-FtPinG0007164700.01.T01	2e-108
127- 1:	At-AT1G07160.1.TAIR10	Ft-FtPinG0007163900.01.T01	5e-110
127- 2:	At-AT1G07180.1.TAIR10	Ft-FtPinG0007162600.01.T01	0
127- 3:	At-AT1G07280.1.TAIR10	Ft-FtPinG0007158800.01.T01	6e-149
127- 4:	At-AT1G07290.1.TAIR10	Ft-FtPinG0007157700.01.T01	9e-78
127- 5:	At-AT1G07310.1.TAIR10	Ft-FtPinG0007157100.01.T01	5e-51
127- 6:	At-AT1G07340.1.TAIR10	Ft-FtPinG0007156800.01.T01	0
127- 7:	At-AT1G07410.1.TAIR10	Ft-FtPinG0009194900.01.T01	7e-139
127- 8:	At-AT1G07420.1.TAIR10	Ft-FtPinG0009197100.01.T01	4e-171
127- 9:	At-AT1G07530.1.TAIR10	Ft-FtPinG0009202800.01.T01	1e-153
127- 10:	At-AT1G07540.1.TAIR10	Ft-FtPinG0009203000.01.T01	1e-116
127- 11:	At-AT1G07570.3.TAIR10	Ft-FtPinG0009207600.01.T01	0
127- 12:	At-AT1G07630.1.TAIR10	Ft-FtPinG0009210100.01.T01	0
127- 13:	At-AT1G07710.1.TAIR10	Ft-FtPinG0009216400.01.T01	7e-11
127- 14:	At-AT1G07770.1.TAIR10	Ft-FtPinG0009221300.01.T01	1e-92
127- 15:	At-AT1G07810.1.TAIR10	Ft-FtPinG0009225900.01.T01	6e-79
127- 16:	At-AT1G07900.1.TAIR10	Ft-FtPinG0009232600.01.T01	9e-51
## Alignment 128: score=679.0 e_value=1.4e-43 N=16 At-Chr1&Ft-Ft8 plus
128- 0:	At-AT1G75390.1.TAIR10	Ft-FtPinG0009370700.01.T01	4e-12
128- 1:	At-AT1G75590.1.TAIR10	Ft-FtPinG0009367800.01.T01	6e-45
128- 2:	At-AT1G75750.1.TAIR10	Ft-FtPinG0009366900.01.T02	1e-26
128- 3:	At-AT1G75760.1.TAIR10	Ft-FtPinG0009366500.01.T01	9e-171
128- 4:	At-AT1G75780.1.TAIR10	Ft-FtPinG0009364700.01.T01	0
128- 5:	At-AT1G75800.1.TAIR10	Ft-FtPinG0009364200.01.T01	2e-118
128- 6:	At-AT1G75850.1.TAIR10	Ft-FtPinG0009363900.01.T01	0
128- 7:	At-AT1G75880.1.TAIR10	Ft-FtPinG0009362800.01.T01	3e-139
128- 8:	At-AT1G76040.2.TAIR10	Ft-FtPinG0009362400.01.T01	0
128- 9:	At-AT1G76185.1.TAIR10	Ft-FtPinG0009361400.01.T01	7e-32
128- 10:	At-AT1G76290.1.TAIR10	Ft-FtPinG0009361100.01.T01	0
128- 11:	At-AT1G76390.1.TAIR10	Ft-FtPinG0009361000.01.T01	0
128- 12:	At-AT1G76405.2.TAIR10	Ft-FtPinG0009360600.01.T01	8e-69
128- 13:	At-AT1G76430.1.TAIR10	Ft-FtPinG0009360100.01.T01	0
128- 14:	At-AT1G76460.1.TAIR10	Ft-FtPinG0009359500.01.T01	1e-112
128- 15:	At-AT1G76700.1.TAIR10	Ft-FtPinG0009359400.01.T02	0
## Alignment 129: score=528.0 e_value=1.3e-28 N=12 At-Chr1&Ft-Ft8 plus
129- 0:	At-AT1G28530.1.TAIR10	Ft-FtPinG0002322200.01.T01	1e-163
129- 1:	At-AT1G28540.1.TAIR10	Ft-FtPinG0002322000.01.T02	7e-34
129- 2:	At-AT1G28550.1.TAIR10	Ft-FtPinG0002321700.01.T01	2e-128
129- 3:	At-AT1G28600.1.TAIR10	Ft-FtPinG0002318400.01.T01	1e-25
129- 4:	At-AT1G29050.1.TAIR10	Ft-FtPinG0002316500.01.T01	5e-165
129- 5:	At-AT1G29090.1.TAIR10	Ft-FtPinG0002315400.01.T01	2e-108
129- 6:	At-AT1G29110.1.TAIR10	Ft-FtPinG0002315100.01.T01	9e-15
129- 7:	At-AT1G29170.1.TAIR10	Ft-FtPinG0002313300.01.T01	2e-25
129- 8:	At-AT1G29195.1.TAIR10	Ft-FtPinG0002311700.01.T01	2e-62
129- 9:	At-AT1G29220.2.TAIR10	Ft-FtPinG0002308000.01.T01	5e-84
129- 10:	At-AT1G29300.1.TAIR10	Ft-FtPinG0002301900.01.T01	2e-62
129- 11:	At-AT1G29310.1.TAIR10	Ft-FtPinG0002301700.01.T01	0
## Alignment 130: score=508.0 e_value=7.5e-28 N=12 At-Chr1&Ft-Ft8 plus
130- 0:	At-AT1G56110.1.TAIR10	Ft-FtPinG0002214200.01.T01	3e-114
130- 1:	At-AT1G56170.1.TAIR10	Ft-FtPinG0002208200.01.T01	6e-66
130- 2:	At-AT1G56230.1.TAIR10	Ft-FtPinG0002198700.01.T02	0
130- 3:	At-AT1G56300.1.TAIR10	Ft-FtPinG0002196700.01.T01	4e-64
130- 4:	At-AT1G56340.1.TAIR10	Ft-FtPinG0002193700.01.T01	0
130- 5:	At-AT1G56423.1.TAIR10	Ft-FtPinG0002193000.01.T01	6e-108
130- 6:	At-AT1G56430.1.TAIR10	Ft-FtPinG0002192800.01.T01	3e-126
130- 7:	At-AT1G56500.1.TAIR10	Ft-FtPinG0002190800.01.T01	0
130- 8:	At-AT1G56570.1.TAIR10	Ft-FtPinG0002189900.01.T01	0
130- 9:	At-AT1G56590.1.TAIR10	Ft-FtPinG0002189700.01.T01	0
130- 10:	At-AT1G56600.1.TAIR10	Ft-FtPinG0002189200.01.T01	8e-173
130- 11:	At-AT1G57550.1.TAIR10	Ft-FtPinG0002187500.01.T01	6e-17
## Alignment 131: score=377.0 e_value=2.6e-15 N=8 At-Chr1&Ft-Ft8 plus
131- 0:	At-AT1G78560.1.TAIR10	Ft-FtPinG0009259800.01.T01	6e-152
131- 1:	At-AT1G78570.1.TAIR10	Ft-FtPinG0009261100.01.T01	0
131- 2:	At-AT1G78580.1.TAIR10	Ft-FtPinG0009261400.01.T01	0
131- 3:	At-AT1G78600.2.TAIR10	Ft-FtPinG0009261700.01.T01	1e-75
131- 4:	At-AT1G78620.2.TAIR10	Ft-FtPinG0009262000.01.T01	3e-139
131- 5:	At-AT1G78650.1.TAIR10	Ft-FtPinG0009262700.01.T01	1e-105
131- 6:	At-AT1G78810.1.TAIR10	Ft-FtPinG0009266800.01.T01	9e-26
131- 7:	At-AT1G78815.1.TAIR10	Ft-FtPinG0009267200.01.T01	2e-73
## Alignment 132: score=339.0 e_value=2e-14 N=8 At-Chr1&Ft-Ft8 plus
132- 0:	At-AT1G20460.1.TAIR10	Ft-FtPinG0009361400.01.T01	8e-41
132- 1:	At-AT1G20560.1.TAIR10	Ft-FtPinG0009361100.01.T01	0
132- 2:	At-AT1G20780.1.TAIR10	Ft-FtPinG0009361000.01.T01	0
132- 3:	At-AT1G20816.1.TAIR10	Ft-FtPinG0009360600.01.T01	2e-69
132- 4:	At-AT1G20840.1.TAIR10	Ft-FtPinG0009360300.01.T01	0
132- 5:	At-AT1G20860.1.TAIR10	Ft-FtPinG0009360100.01.T01	0
132- 6:	At-AT1G20880.1.TAIR10	Ft-FtPinG0009359500.01.T01	2e-93
132- 7:	At-AT1G21080.3.TAIR10	Ft-FtPinG0009359400.01.T02	0
## Alignment 133: score=303.0 e_value=4.8e-14 N=7 At-Chr1&Ft-Ft8 plus
133- 0:	At-AT1G61040.1.TAIR10	Ft-FtPinG0002285200.01.T01	0
133- 1:	At-AT1G61065.1.TAIR10	Ft-FtPinG0002284000.01.T01	4e-55
133- 2:	At-AT1G61080.1.TAIR10	Ft-FtPinG0002283700.01.T01	8e-80
133- 3:	At-AT1G61250.1.TAIR10	Ft-FtPinG0002281400.01.T01	1e-155
133- 4:	At-AT1G61255.1.TAIR10	Ft-FtPinG0002281100.01.T01	1e-15
133- 5:	At-AT1G61350.1.TAIR10	Ft-FtPinG0002273600.01.T01	2e-169
133- 6:	At-AT1G61390.1.TAIR10	Ft-FtPinG0002269300.01.T01	0
## Alignment 134: score=286.0 e_value=1.2e-08 N=6 At-Chr1&Ft-Ft8 plus
134- 0:	At-AT1G29630.2.TAIR10	Ft-FtPinG0003348700.01.T01	0
134- 1:	At-AT1G29640.1.TAIR10	Ft-FtPinG0003349800.01.T01	1e-14
134- 2:	At-AT1G29730.1.TAIR10	Ft-FtPinG0003350400.01.T01	0
134- 3:	At-AT1G29760.1.TAIR10	Ft-FtPinG0003350500.01.T01	2e-83
134- 4:	At-AT1G29770.1.TAIR10	Ft-FtPinG0003351300.01.T01	1e-50
134- 5:	At-AT1G29800.1.TAIR10	Ft-FtPinG0003351700.01.T01	0
## Alignment 135: score=282.0 e_value=3.1e-11 N=7 At-Chr1&Ft-Ft8 plus
135- 0:	At-AT1G54450.1.TAIR10	Ft-FtPinG0002217500.01.T01	0
135- 1:	At-AT1G54490.1.TAIR10	Ft-FtPinG0002214300.01.T01	0
135- 2:	At-AT1G54610.2.TAIR10	Ft-FtPinG0002214000.01.T01	0
135- 3:	At-AT1G54830.1.TAIR10	Ft-FtPinG0002208200.01.T01	8e-75
135- 4:	At-AT1G55040.1.TAIR10	Ft-FtPinG0002206200.01.T01	1e-165
135- 5:	At-AT1G55050.1.TAIR10	Ft-FtPinG0002204800.01.T01	9e-24
135- 6:	At-AT1G55150.1.TAIR10	Ft-FtPinG0002204000.01.T01	8e-103
## Alignment 136: score=280.0 e_value=3.7e-08 N=6 At-Chr1&Ft-Ft8 plus
136- 0:	At-AT1G16710.1.TAIR10	Ft-FtPinG0006519600.01.T01	0
136- 1:	At-AT1G16760.1.TAIR10	Ft-FtPinG0006518800.01.T01	1e-53
136- 2:	At-AT1G16780.1.TAIR10	Ft-FtPinG0008668200.01.T01	0
136- 3:	At-AT1G16800.1.TAIR10	Ft-FtPinG0008666900.01.T01	0
136- 4:	At-AT1G16825.1.TAIR10	Ft-FtPinG0008666300.01.T01	1e-68
136- 5:	At-AT1G16840.1.TAIR10	Ft-FtPinG0008663400.01.T01	1e-30
## Alignment 137: score=270.0 e_value=6.7e-09 N=6 At-Chr1&Ft-Ft8 plus
137- 0:	At-AT1G74380.1.TAIR10	Ft-FtPinG0002338200.01.T01	0
137- 1:	At-AT1G74440.1.TAIR10	Ft-FtPinG0002337400.01.T01	1e-80
137- 2:	At-AT1G74520.1.TAIR10	Ft-FtPinG0002336900.01.T02	6e-88
137- 3:	At-AT1G74650.1.TAIR10	Ft-FtPinG0002335200.01.T01	1e-102
137- 4:	At-AT1G74680.1.TAIR10	Ft-FtPinG0002335000.01.T01	0
137- 5:	At-AT1G74730.1.TAIR10	Ft-FtPinG0002334200.01.T01	1e-66
## Alignment 138: score=265.0 e_value=5e-09 N=6 At-Chr1&Ft-Ft8 plus
138- 0:	At-AT1G11070.1.TAIR10	Ft-FtPinG0002283700.01.T01	4e-90
138- 1:	At-AT1G11180.2.TAIR10	Ft-FtPinG0002281400.01.T01	2e-151
138- 2:	At-AT1G11190.1.TAIR10	Ft-FtPinG0002277100.01.T01	3e-110
138- 3:	At-AT1G11260.1.TAIR10	Ft-FtPinG0002273400.01.T01	0
138- 4:	At-AT1G11300.1.TAIR10	Ft-FtPinG0002269300.01.T01	0
138- 5:	At-AT1G11340.1.TAIR10	Ft-FtPinG0002269100.01.T01	0
## Alignment 139: score=258.0 e_value=3.3e-09 N=6 At-Chr1&Ft-Ft8 plus
139- 0:	At-AT1G77122.1.TAIR10	Ft-FtPinG0002167600.01.T01	1e-85
139- 1:	At-AT1G77270.1.TAIR10	Ft-FtPinG0002163800.01.T01	3e-13
139- 2:	At-AT1G77300.1.TAIR10	Ft-FtPinG0002163300.01.T01	0
139- 3:	At-AT1G77440.1.TAIR10	Ft-FtPinG0002162900.01.T01	6e-32
139- 4:	At-AT1G77510.1.TAIR10	Ft-FtPinG0002162800.01.T01	0
139- 5:	At-AT1G77590.1.TAIR10	Ft-FtPinG0002161100.01.T01	0
## Alignment 140: score=519.0 e_value=7.7e-24 N=11 At-Chr1&Ft-Ft8 minus
140- 0:	At-AT1G30090.1.TAIR10	Ft-FtPinG0009412000.01.T01	0
140- 1:	At-AT1G30100.1.TAIR10	Ft-FtPinG0009412200.01.T01	0
140- 2:	At-AT1G30120.1.TAIR10	Ft-FtPinG0001003800.01.T01	0
140- 3:	At-AT1G30135.1.TAIR10	Ft-FtPinG0001004100.01.T01	4e-18
140- 4:	At-AT1G30200.1.TAIR10	Ft-FtPinG0001006100.01.T01	5e-162
140- 5:	At-AT1G30210.1.TAIR10	Ft-FtPinG0006025100.01.T01	5e-45
140- 6:	At-AT1G30290.1.TAIR10	Ft-FtPinG0002498800.01.T01	0
140- 7:	At-AT1G30320.1.TAIR10	Ft-FtPinG0002499300.01.T01	2e-88
140- 8:	At-AT1G30360.1.TAIR10	Ft-FtPinG0002500100.01.T01	0
140- 9:	At-AT1G30380.1.TAIR10	Ft-FtPinG0002501300.01.T01	3e-65
140- 10:	At-AT1G30450.1.TAIR10	Ft-FtPinG0002501600.01.T01	0
## Alignment 141: score=518.0 e_value=3.3e-23 N=11 At-Chr1&Ft-Ft8 minus
141- 0:	At-AT1G51140.1.TAIR10	Ft-FtPinG0003274700.01.T01	2e-56
141- 1:	At-AT1G51170.1.TAIR10	Ft-FtPinG0000990500.01.T01	6e-141
141- 2:	At-AT1G51200.1.TAIR10	Ft-FtPinG0000989700.01.T01	4e-55
141- 3:	At-AT1G51310.1.TAIR10	Ft-FtPinG0000987300.01.T01	0
141- 4:	At-AT1G51340.2.TAIR10	Ft-FtPinG0000986400.01.T01	0
141- 5:	At-AT1G51350.1.TAIR10	Ft-FtPinG0000986000.01.T01	0
141- 6:	At-AT1G51410.1.TAIR10	Ft-FtPinG0000983500.01.T01	0
141- 7:	At-AT1G51450.1.TAIR10	Ft-FtPinG0000982400.01.T01	5e-151
141- 8:	At-AT1G51460.1.TAIR10	Ft-FtPinG0000981900.01.T01	0
141- 9:	At-AT1G51510.1.TAIR10	Ft-FtPinG0000981500.01.T01	9e-88
141- 10:	At-AT1G51520.2.TAIR10	Ft-FtPinG0000981200.01.T01	3e-77
## Alignment 142: score=509.0 e_value=2e-22 N=11 At-Chr1&Ft-Ft8 minus
142- 0:	At-AT1G11650.2.TAIR10	Ft-FtPinG0005372200.01.T01	1e-150
142- 1:	At-AT1G11670.1.TAIR10	Ft-FtPinG0005369800.01.T01	0
142- 2:	At-AT1G11700.1.TAIR10	Ft-FtPinG0005369400.01.T01	1e-48
142- 3:	At-AT1G11720.2.TAIR10	Ft-FtPinG0005368600.01.T01	0
142- 4:	At-AT1G11730.1.TAIR10	Ft-FtPinG0005368200.01.T01	2e-178
142- 5:	At-AT1G11840.6.TAIR10	Ft-FtPinG0005365700.01.T01	2e-165
142- 6:	At-AT1G11905.1.TAIR10	Ft-FtPinG0005364600.01.T01	7e-30
142- 7:	At-AT1G11940.1.TAIR10	Ft-FtPinG0005363700.01.T01	2e-159
142- 8:	At-AT1G11960.1.TAIR10	Ft-FtPinG0005363500.01.T01	0
142- 9:	At-AT1G11990.1.TAIR10	Ft-FtPinG0005363200.01.T01	0
142- 10:	At-AT1G12000.1.TAIR10	Ft-FtPinG0005361900.01.T01	0
## Alignment 143: score=357.0 e_value=1.1e-13 N=8 At-Chr1&Ft-Ft8 minus
143- 0:	At-AT1G53210.1.TAIR10	Ft-FtPinG0000966400.01.T01	0
143- 1:	At-AT1G53240.1.TAIR10	Ft-FtPinG0000963500.01.T01	0
143- 2:	At-AT1G53310.1.TAIR10	Ft-FtPinG0009267300.01.T01	0
143- 3:	At-AT1G53320.1.TAIR10	Ft-FtPinG0009266500.01.T01	4e-176
143- 4:	At-AT1G53380.1.TAIR10	Ft-FtPinG0009263100.01.T01	5e-174
143- 5:	At-AT1G53460.1.TAIR10	Ft-FtPinG0009262600.01.T02	9e-64
143- 6:	At-AT1G53500.1.TAIR10	Ft-FtPinG0009261100.01.T01	0
143- 7:	At-AT1G53510.1.TAIR10	Ft-FtPinG0009258900.01.T01	0
## Alignment 144: score=317.0 e_value=1.7e-10 N=7 At-Chr1&Ft-Ft8 minus
144- 0:	At-AT1G29820.1.TAIR10	Ft-FtPinG0002324900.01.T01	0
144- 1:	At-AT1G29860.1.TAIR10	Ft-FtPinG0002325700.01.T01	5e-57
144- 2:	At-AT1G29890.2.TAIR10	Ft-FtPinG0002326100.01.T01	0
144- 3:	At-AT1G29910.1.TAIR10	Ft-FtPinG0002327400.01.T02	2e-174
144- 4:	At-AT1G30020.1.TAIR10	Ft-FtPinG0002330400.01.T01	2e-41
144- 5:	At-AT1G30040.1.TAIR10	Ft-FtPinG0002330600.01.T01	1e-131
144- 6:	At-AT1G30130.1.TAIR10	Ft-FtPinG0002332500.01.T01	2e-142
## Alignment 145: score=301.0 e_value=1.7e-11 N=7 At-Chr1&Ft-Ft8 minus
145- 0:	At-AT1G73670.1.TAIR10	Ft-FtPinG0003385700.01.T01	9e-166
145- 1:	At-AT1G73830.1.TAIR10	Ft-FtPinG0003380800.01.T01	6e-56
145- 2:	At-AT1G73850.1.TAIR10	Ft-FtPinG0003376200.01.T01	1e-136
145- 3:	At-AT1G73870.1.TAIR10	Ft-FtPinG0003375700.01.T01	5e-31
145- 4:	At-AT1G73875.1.TAIR10	Ft-FtPinG0003375400.01.T01	3e-153
145- 5:	At-AT1G73920.1.TAIR10	Ft-FtPinG0003369600.01.T01	0
145- 6:	At-AT1G73950.1.TAIR10	Ft-FtPinG0003367600.01.T01	0
## Alignment 146: score=292.0 e_value=4.6e-11 N=7 At-Chr1&Ft-Ft8 minus
146- 0:	At-AT1G08160.1.TAIR10	Ft-FtPinG0007437300.01.T01	1e-13
146- 1:	At-AT1G08190.1.TAIR10	Ft-FtPinG0009099100.01.T01	0
146- 2:	At-AT1G08220.1.TAIR10	Ft-FtPinG0009093200.01.T01	1e-103
146- 3:	At-AT1G08230.2.TAIR10	Ft-FtPinG0009091700.01.T01	3e-172
146- 4:	At-AT1G08250.1.TAIR10	Ft-FtPinG0006570700.01.T01	0
146- 5:	At-AT1G08280.1.TAIR10	Ft-FtPinG0004911400.01.T01	8e-131
146- 6:	At-AT1G08310.2.TAIR10	Ft-FtPinG0004910400.01.T01	2e-124
## Alignment 147: score=283.0 e_value=1e-08 N=6 At-Chr1&Ft-Ft8 minus
147- 0:	At-AT1G04560.1.TAIR10	Ft-FtPinG0004343900.01.T01	6e-95
147- 1:	At-AT1G04600.1.TAIR10	Ft-FtPinG0004346700.01.T02	0
147- 2:	At-AT1G04610.1.TAIR10	Ft-FtPinG0004346900.01.T01	0
147- 3:	At-AT1G04630.1.TAIR10	Ft-FtPinG0004347200.01.T01	6e-89
147- 4:	At-AT1G04645.1.TAIR10	Ft-FtPinG0004348300.01.T01	2e-16
147- 5:	At-AT1G04680.1.TAIR10	Ft-FtPinG0004349200.01.T01	0
## Alignment 148: score=277.0 e_value=2.3e-08 N=6 At-Chr1&Ft-Ft8 minus
148- 0:	At-AT1G78890.1.TAIR10	Ft-FtPinG0008663400.01.T01	3e-28
148- 1:	At-AT1G78900.1.TAIR10	Ft-FtPinG0008665900.01.T01	0
148- 2:	At-AT1G78915.3.TAIR10	Ft-FtPinG0008667500.01.T01	6e-148
148- 3:	At-AT1G78920.1.TAIR10	Ft-FtPinG0008668200.01.T01	0
148- 4:	At-AT1G78940.2.TAIR10	Ft-FtPinG0006518800.01.T01	3e-52
148- 5:	At-AT1G79000.2.TAIR10	Ft-FtPinG0006519600.01.T01	9e-50
## Alignment 149: score=277.0 e_value=9.9e-12 N=7 At-Chr1&Ft-Ft8 minus
149- 0:	At-AT1G68160.1.TAIR10	Ft-FtPinG0003389100.01.T01	4e-32
149- 1:	At-AT1G68340.1.TAIR10	Ft-FtPinG0003382800.01.T01	5e-14
149- 2:	At-AT1G68450.1.TAIR10	Ft-FtPinG0003376500.01.T01	1e-14
149- 3:	At-AT1G68510.1.TAIR10	Ft-FtPinG0003375900.01.T01	1e-67
149- 4:	At-AT1G68520.1.TAIR10	Ft-FtPinG0003375700.01.T01	2e-29
149- 5:	At-AT1G68550.1.TAIR10	Ft-FtPinG0003374900.01.T01	1e-19
149- 6:	At-AT1G68710.1.TAIR10	Ft-FtPinG0003363800.01.T01	0
## Alignment 150: score=276.0 e_value=2.4e-09 N=6 At-Chr1&Ft-Ft8 minus
150- 0:	At-AT1G06850.1.TAIR10	Ft-FtPinG0009241000.01.T01	9e-72
150- 1:	At-AT1G06890.1.TAIR10	Ft-FtPinG0009240600.01.T01	0
150- 2:	At-AT1G06920.1.TAIR10	Ft-FtPinG0009239900.01.T01	5e-24
150- 3:	At-AT1G06923.1.TAIR10	Ft-FtPinG0009239600.01.T01	3e-24
150- 4:	At-AT1G06950.1.TAIR10	Ft-FtPinG0009238100.01.T01	0
150- 5:	At-AT1G07090.1.TAIR10	Ft-FtPinG0009236200.01.T01	2e-88
## Alignment 151: score=274.0 e_value=3.2e-09 N=6 At-Chr1&Ft-Ft8 minus
151- 0:	At-AT1G02090.1.TAIR10	Ft-FtPinG0009258500.01.T01	5e-140
151- 1:	At-AT1G02100.1.TAIR10	Ft-FtPinG0009258400.01.T01	3e-175
151- 2:	At-AT1G02110.1.TAIR10	Ft-FtPinG0009258200.01.T01	0
151- 3:	At-AT1G02120.1.TAIR10	Ft-FtPinG0009257200.01.T01	8e-173
151- 4:	At-AT1G02150.1.TAIR10	Ft-FtPinG0009255400.01.T02	2e-146
151- 5:	At-AT1G02180.1.TAIR10	Ft-FtPinG0009246500.01.T01	2e-75
## Alignment 152: score=273.0 e_value=1.9e-08 N=6 At-Chr1&Ft-Ft8 minus
152- 0:	At-AT1G03650.1.TAIR10	Ft-FtPinG0003318600.01.T01	1e-76
152- 1:	At-AT1G03670.1.TAIR10	Ft-FtPinG0003318000.01.T01	4e-23
152- 2:	At-AT1G03730.1.TAIR10	Ft-FtPinG0003313700.01.T01	2e-48
152- 3:	At-AT1G03750.1.TAIR10	Ft-FtPinG0003311600.01.T01	0
152- 4:	At-AT1G03790.1.TAIR10	Ft-FtPinG0003310400.01.T01	1e-74
152- 5:	At-AT1G03800.1.TAIR10	Ft-FtPinG0003308600.01.T01	6e-30
## Alignment 153: score=626.0 e_value=1.7e-34 N=14 At-Chr2&Ft-Ft1 plus
153- 0:	At-AT2G28590.1.TAIR10	Ft-FtPinG0001857700.01.T01	7e-172
153- 1:	At-AT2G28610.1.TAIR10	Ft-FtPinG0001852200.01.T01	3e-40
153- 2:	At-AT2G28620.1.TAIR10	Ft-FtPinG0001851900.01.T01	0
153- 3:	At-AT2G28630.1.TAIR10	Ft-FtPinG0009270300.01.T01	0
153- 4:	At-AT2G28640.1.TAIR10	Ft-FtPinG0009270100.01.T01	6e-139
153- 5:	At-AT2G28660.1.TAIR10	Ft-FtPinG0009270000.01.T01	4e-29
153- 6:	At-AT2G28690.1.TAIR10	Ft-FtPinG0005233700.01.T01	4e-25
153- 7:	At-AT2G28720.1.TAIR10	Ft-FtPinG0008430300.01.T01	1e-82
153- 8:	At-AT2G28760.1.TAIR10	Ft-FtPinG0008431400.01.T01	0
153- 9:	At-AT2G28830.1.TAIR10	Ft-FtPinG0008433400.01.T01	3e-59
153- 10:	At-AT2G28840.1.TAIR10	Ft-FtPinG0008434300.01.T01	0
153- 11:	At-AT2G28930.1.TAIR10	Ft-FtPinG0008435500.01.T01	0
153- 12:	At-AT2G28950.1.TAIR10	Ft-FtPinG0008436400.01.T01	2e-156
153- 13:	At-AT2G29040.1.TAIR10	Ft-FtPinG0008437100.01.T01	3e-144
## Alignment 154: score=484.0 e_value=1.7e-23 N=11 At-Chr2&Ft-Ft1 plus
154- 0:	At-AT2G37440.1.TAIR10	Ft-FtPinG0008222100.01.T01	0
154- 1:	At-AT2G37450.2.TAIR10	Ft-FtPinG0008222400.01.T01	7e-108
154- 2:	At-AT2G37520.1.TAIR10	Ft-FtPinG0006013100.01.T02	2e-41
154- 3:	At-AT2G37590.1.TAIR10	Ft-FtPinG0006014000.01.T01	3e-53
154- 4:	At-AT2G37650.1.TAIR10	Ft-FtPinG0006016300.01.T01	0
154- 5:	At-AT2G37680.1.TAIR10	Ft-FtPinG0006018200.01.T01	6e-133
154- 6:	At-AT2G37710.1.TAIR10	Ft-FtPinG0006018600.01.T01	6e-103
154- 7:	At-AT2G37840.1.TAIR10	Ft-FtPinG0006018700.01.T01	0
154- 8:	At-AT2G37940.1.TAIR10	Ft-FtPinG0006021200.01.T01	2e-165
154- 9:	At-AT2G38100.1.TAIR10	Ft-FtPinG0008488300.01.T01	3e-118
154- 10:	At-AT2G38110.1.TAIR10	Ft-FtPinG0008486500.01.T01	0
## Alignment 155: score=370.0 e_value=4.8e-15 N=8 At-Chr2&Ft-Ft1 plus
155- 0:	At-AT2G02760.1.TAIR10	Ft-FtPinG0000180700.01.T02	7e-79
155- 1:	At-AT2G02800.1.TAIR10	Ft-FtPinG0000181000.01.T01	3e-178
155- 2:	At-AT2G02820.2.TAIR10	Ft-FtPinG0000181800.01.T01	1e-62
155- 3:	At-AT2G02860.1.TAIR10	Ft-FtPinG0000184200.01.T01	0
155- 4:	At-AT2G02870.1.TAIR10	Ft-FtPinG0000184900.01.T01	0
155- 5:	At-AT2G02970.1.TAIR10	Ft-FtPinG0000195400.01.T01	1e-170
155- 6:	At-AT2G02980.1.TAIR10	Ft-FtPinG0000196700.01.T01	0
155- 7:	At-AT2G02990.1.TAIR10	Ft-FtPinG0000196900.01.T01	2e-113
## Alignment 156: score=340.0 e_value=7.3e-15 N=8 At-Chr2&Ft-Ft1 plus
156- 0:	At-AT2G47510.1.TAIR10	Ft-FtPinG0007985700.01.T01	0
156- 1:	At-AT2G47570.1.TAIR10	Ft-FtPinG0007986600.01.T01	3e-72
156- 2:	At-AT2G47630.1.TAIR10	Ft-FtPinG0007987500.01.T01	2e-39
156- 3:	At-AT2G47690.1.TAIR10	Ft-FtPinG0007987700.01.T01	1e-47
156- 4:	At-AT2G47700.1.TAIR10	Ft-FtPinG0007989000.01.T01	1e-36
156- 5:	At-AT2G47870.1.TAIR10	Ft-FtPinG0007992000.01.T01	3e-47
156- 6:	At-AT2G48080.1.TAIR10	Ft-FtPinG0007997800.01.T01	1e-132
156- 7:	At-AT2G48160.1.TAIR10	Ft-FtPinG0007999300.01.T01	6e-50
## Alignment 157: score=330.0 e_value=2.6e-11 N=7 At-Chr2&Ft-Ft1 plus
157- 0:	At-AT2G21200.1.TAIR10	Ft-FtPinG0001622200.01.T01	1e-24
157- 1:	At-AT2G21250.1.TAIR10	Ft-FtPinG0001623700.01.T01	7e-42
157- 2:	At-AT2G21270.3.TAIR10	Ft-FtPinG0001624300.01.T01	4e-81
157- 3:	At-AT2G21390.1.TAIR10	Ft-FtPinG0001624900.01.T01	0
157- 4:	At-AT2G21400.1.TAIR10	Ft-FtPinG0001625300.01.T01	3e-37
157- 5:	At-AT2G21410.1.TAIR10	Ft-FtPinG0001625700.01.T02	0
157- 6:	At-AT2G21430.1.TAIR10	Ft-FtPinG0001626000.01.T02	0
## Alignment 158: score=325.0 e_value=1.5e-15 N=8 At-Chr2&Ft-Ft1 plus
158- 0:	At-AT2G03430.1.TAIR10	Ft-FtPinG0000195000.01.T01	9e-11
158- 1:	At-AT2G03505.1.TAIR10	Ft-FtPinG0000199500.01.T01	1e-41
158- 2:	At-AT2G03510.1.TAIR10	Ft-FtPinG0000210200.01.T01	0
158- 3:	At-AT2G03730.1.TAIR10	Ft-FtPinG0000213800.01.T01	0
158- 4:	At-AT2G03760.1.TAIR10	Ft-FtPinG0000213900.01.T01	6e-112
158- 5:	At-AT2G03800.1.TAIR10	Ft-FtPinG0000214700.01.T01	2e-163
158- 6:	At-AT2G03810.1.TAIR10	Ft-FtPinG0000215500.01.T01	5e-39
158- 7:	At-AT2G03890.1.TAIR10	Ft-FtPinG0000217100.01.T01	0
## Alignment 159: score=319.0 e_value=2.7e-13 N=7 At-Chr2&Ft-Ft1 plus
159- 0:	At-AT2G29060.1.TAIR10	Ft-FtPinG0003179600.01.T01	1e-120
159- 1:	At-AT2G29065.1.TAIR10	Ft-FtPinG0003178000.01.T01	4e-22
159- 2:	At-AT2G29070.2.TAIR10	Ft-FtPinG0003177400.01.T01	5e-29
159- 3:	At-AT2G29080.1.TAIR10	Ft-FtPinG0003176700.01.T01	0
159- 4:	At-AT2G29090.1.TAIR10	Ft-FtPinG0003175900.01.T01	0
159- 5:	At-AT2G29200.1.TAIR10	Ft-FtPinG0003175600.01.T01	1e-11
159- 6:	At-AT2G29390.1.TAIR10	Ft-FtPinG0003172700.01.T01	5e-171
## Alignment 160: score=317.0 e_value=5.1e-11 N=7 At-Chr2&Ft-Ft1 plus
160- 0:	At-AT2G28620.1.TAIR10	Ft-FtPinG0001389200.01.T02	0
160- 1:	At-AT2G28630.1.TAIR10	Ft-FtPinG0001389600.01.T01	0
160- 2:	At-AT2G28660.1.TAIR10	Ft-FtPinG0001389700.01.T01	2e-19
160- 3:	At-AT2G28690.1.TAIR10	Ft-FtPinG0001390200.01.T01	1e-47
160- 4:	At-AT2G28840.1.TAIR10	Ft-FtPinG0001391700.01.T01	0
160- 5:	At-AT2G28910.1.TAIR10	Ft-FtPinG0001393000.01.T01	1e-57
160- 6:	At-AT2G29040.1.TAIR10	Ft-FtPinG0001393500.01.T01	2e-159
## Alignment 161: score=308.0 e_value=3.2e-11 N=7 At-Chr2&Ft-Ft1 plus
161- 0:	At-AT2G38480.1.TAIR10	Ft-FtPinG0005754200.01.T01	4e-18
161- 1:	At-AT2G38490.1.TAIR10	Ft-FtPinG0005751900.01.T01	9e-118
161- 2:	At-AT2G38500.1.TAIR10	Ft-FtPinG0005750300.01.T01	4e-37
161- 3:	At-AT2G38540.1.TAIR10	Ft-FtPinG0004833600.01.T01	1e-20
161- 4:	At-AT2G38550.1.TAIR10	Ft-FtPinG0004830000.01.T01	2e-73
161- 5:	At-AT2G38580.1.TAIR10	Ft-FtPinG0004827700.01.T01	3e-12
161- 6:	At-AT2G38670.1.TAIR10	Ft-FtPinG0004825400.01.T01	0
## Alignment 162: score=294.0 e_value=2.8e-12 N=7 At-Chr2&Ft-Ft1 plus
162- 0:	At-AT2G07771.2.TAIR10	Ft-FtPinG0006127300.01.T01	7e-157
162- 1:	At-AT2G07671.1.TAIR10	Ft-FtPinG0008820200.01.T01	7e-31
162- 2:	At-AT2G07751.1.TAIR10	Ft-FtPinG0006249300.01.T01	1e-18
162- 3:	At-AT2G07768.1.TAIR10	Ft-FtPinG0009730300.01.T01	1e-70
162- 4:	At-AT2G07689.1.TAIR10	Ft-FtPinG0007906400.01.T01	6e-131
162- 5:	At-AT2G07691.1.TAIR10	Ft-FtPinG0007908000.01.T01	4e-12
162- 6:	At-AT2G07698.1.TAIR10	Ft-FtPinG0007910200.01.T01	0
## Alignment 163: score=275.0 e_value=1.6e-08 N=6 At-Chr2&Ft-Ft1 plus
163- 0:	At-AT2G20140.1.TAIR10	Ft-FtPinG0006444800.01.T01	0
163- 1:	At-AT2G20230.1.TAIR10	Ft-FtPinG0006445700.01.T01	2e-72
163- 2:	At-AT2G20270.2.TAIR10	Ft-FtPinG0006446400.01.T01	2e-45
163- 3:	At-AT2G20360.1.TAIR10	Ft-FtPinG0006446700.01.T01	0
163- 4:	At-AT2G20370.1.TAIR10	Ft-FtPinG0006446900.01.T01	0
163- 5:	At-AT2G20430.1.TAIR10	Ft-FtPinG0006448100.01.T01	2e-31
## Alignment 164: score=274.0 e_value=1.3e-09 N=6 At-Chr2&Ft-Ft1 plus
164- 0:	At-AT2G47170.1.TAIR10	Ft-FtPinG0005099300.01.T01	4e-133
164- 1:	At-AT2G47220.1.TAIR10	Ft-FtPinG0005100900.01.T01	7e-29
164- 2:	At-AT2G47250.1.TAIR10	Ft-FtPinG0005101400.01.T02	0
164- 3:	At-AT2G47320.1.TAIR10	Ft-FtPinG0005102700.01.T01	2e-69
164- 4:	At-AT2G47330.1.TAIR10	Ft-FtPinG0004690000.01.T01	0
164- 5:	At-AT2G47480.1.TAIR10	Ft-FtPinG0009376700.01.T01	5e-16
## Alignment 165: score=934.0 e_value=2.7e-56 N=20 At-Chr2&Ft-Ft1 minus
165- 0:	At-AT2G44980.2.TAIR10	Ft-FtPinG0000286700.01.T01	0
165- 1:	At-AT2G45070.1.TAIR10	Ft-FtPinG0000285500.01.T01	1e-30
165- 2:	At-AT2G45120.1.TAIR10	Ft-FtPinG0000280000.01.T01	7e-19
165- 3:	At-AT2G45130.1.TAIR10	Ft-FtPinG0000278200.01.T01	4e-98
165- 4:	At-AT2G45140.1.TAIR10	Ft-FtPinG0000276800.01.T01	3e-112
165- 5:	At-AT2G45160.1.TAIR10	Ft-FtPinG0000276100.01.T01	1e-106
165- 6:	At-AT2G45190.1.TAIR10	Ft-FtPinG0000273100.01.T01	2e-65
165- 7:	At-AT2G45200.2.TAIR10	Ft-FtPinG0000271900.01.T01	1e-148
165- 8:	At-AT2G45210.1.TAIR10	Ft-FtPinG0000271800.01.T01	3e-33
165- 9:	At-AT2G45220.1.TAIR10	Ft-FtPinG0000270200.01.T01	2e-157
165- 10:	At-AT2G45260.1.TAIR10	Ft-FtPinG0000270000.01.T01	0
165- 11:	At-AT2G45290.1.TAIR10	Ft-FtPinG0000269000.01.T01	0
165- 12:	At-AT2G45300.1.TAIR10	Ft-FtPinG0000268200.01.T01	0
165- 13:	At-AT2G45310.1.TAIR10	Ft-FtPinG0000267800.01.T01	0
165- 14:	At-AT2G45320.1.TAIR10	Ft-FtPinG0000267500.01.T01	1e-164
165- 15:	At-AT2G45360.1.TAIR10	Ft-FtPinG0000267300.01.T01	3e-26
165- 16:	At-AT2G45410.1.TAIR10	Ft-FtPinG0000265000.01.T01	1e-52
165- 17:	At-AT2G45430.1.TAIR10	Ft-FtPinG0000264600.01.T01	2e-83
165- 18:	At-AT2G45470.1.TAIR10	Ft-FtPinG0000263500.01.T01	6e-167
165- 19:	At-AT2G45550.1.TAIR10	Ft-FtPinG0000260200.01.T02	2e-176
## Alignment 166: score=689.0 e_value=6.2e-42 N=16 At-Chr2&Ft-Ft1 minus
166- 0:	At-AT2G28930.1.TAIR10	Ft-FtPinG0008610200.01.T01	1e-127
166- 1:	At-AT2G29060.1.TAIR10	Ft-FtPinG0008615700.01.T01	6e-143
166- 2:	At-AT2G29140.1.TAIR10	Ft-FtPinG0008615900.01.T01	0
166- 3:	At-AT2G29290.2.TAIR10	Ft-FtPinG0008381900.01.T01	5e-105
166- 4:	At-AT2G29330.1.TAIR10	Ft-FtPinG0008382900.01.T01	6e-109
166- 5:	At-AT2G29510.1.TAIR10	Ft-FtPinG0008385300.01.T01	7e-50
166- 6:	At-AT2G29530.3.TAIR10	Ft-FtPinG0008385800.01.T01	1e-34
166- 7:	At-AT2G29570.1.TAIR10	Ft-FtPinG0008693000.01.T01	0
166- 8:	At-AT2G29650.1.TAIR10	Ft-FtPinG0008695000.01.T01	0
166- 9:	At-AT2G29660.1.TAIR10	Ft-FtPinG0008695100.01.T01	3e-60
166- 10:	At-AT2G29670.1.TAIR10	Ft-FtPinG0008695600.01.T01	1e-156
166- 11:	At-AT2G29760.1.TAIR10	Ft-FtPinG0008695900.01.T01	0
166- 12:	At-AT2G29890.3.TAIR10	Ft-FtPinG0008696300.01.T01	0
166- 13:	At-AT2G29990.1.TAIR10	Ft-FtPinG0008699000.01.T01	0
166- 14:	At-AT2G30010.1.TAIR10	Ft-FtPinG0008699900.01.T01	6e-151
166- 15:	At-AT2G30040.1.TAIR10	Ft-FtPinG0008700300.01.T01	1e-103
## Alignment 167: score=629.0 e_value=2.3e-33 N=14 At-Chr2&Ft-Ft1 minus
167- 0:	At-AT2G40060.1.TAIR10	Ft-FtPinG0002442900.01.T01	2e-71
167- 1:	At-AT2G40070.1.TAIR10	Ft-FtPinG0002443200.01.T01	2e-179
167- 2:	At-AT2G40110.1.TAIR10	Ft-FtPinG0002443300.01.T01	1e-75
167- 3:	At-AT2G40170.1.TAIR10	Ft-FtPinG0002444400.01.T01	1e-46
167- 4:	At-AT2G40320.1.TAIR10	Ft-FtPinG0002445000.01.T01	0
167- 5:	At-AT2G40330.1.TAIR10	Ft-FtPinG0002445200.01.T01	4e-27
167- 6:	At-AT2G40390.1.TAIR10	Ft-FtPinG0002446100.01.T01	2e-66
167- 7:	At-AT2G40420.1.TAIR10	Ft-FtPinG0002447300.01.T01	2e-146
167- 8:	At-AT2G40435.1.TAIR10	Ft-FtPinG0002447500.01.T01	4e-53
167- 9:	At-AT2G40450.1.TAIR10	Ft-FtPinG0002447800.01.T01	4e-29
167- 10:	At-AT2G40490.1.TAIR10	Ft-FtPinG0002448700.01.T01	0
167- 11:	At-AT2G40660.1.TAIR10	Ft-FtPinG0002451900.01.T01	3e-137
167- 12:	At-AT2G40670.2.TAIR10	Ft-FtPinG0002452300.01.T01	2e-53
167- 13:	At-AT2G40770.1.TAIR10	Ft-FtPinG0002452600.01.T01	0
## Alignment 168: score=598.0 e_value=3.1e-28 N=13 At-Chr2&Ft-Ft1 minus
168- 0:	At-AT2G35960.1.TAIR10	Ft-FtPinG0005755500.01.T01	4e-71
168- 1:	At-AT2G35980.1.TAIR10	Ft-FtPinG0005755700.01.T01	1e-60
168- 2:	At-AT2G36020.1.TAIR10	Ft-FtPinG0005758400.01.T01	9e-65
168- 3:	At-AT2G36080.1.TAIR10	Ft-FtPinG0005758500.01.T01	6e-62
168- 4:	At-AT2G36170.1.TAIR10	Ft-FtPinG0005759300.01.T01	2e-91
168- 5:	At-AT2G36200.2.TAIR10	Ft-FtPinG0005759800.01.T01	0
168- 6:	At-AT2G36220.1.TAIR10	Ft-FtPinG0005762000.01.T01	1e-39
168- 7:	At-AT2G36250.1.TAIR10	Ft-FtPinG0006313300.01.T01	0
168- 8:	At-AT2G36290.1.TAIR10	Ft-FtPinG0008012000.01.T01	3e-162
168- 9:	At-AT2G36320.1.TAIR10	Ft-FtPinG0008013800.01.T01	5e-53
168- 10:	At-AT2G36380.1.TAIR10	Ft-FtPinG0008014500.01.T02	0
168- 11:	At-AT2G36390.1.TAIR10	Ft-FtPinG0008014900.01.T01	0
168- 12:	At-AT2G36410.1.TAIR10	Ft-FtPinG0008015300.01.T01	5e-71
## Alignment 169: score=580.0 e_value=1.8e-25 N=12 At-Chr2&Ft-Ft1 minus
169- 0:	At-AT2G44590.3.TAIR10	Ft-FtPinG0001863800.01.T01	6e-149
169- 1:	At-AT2G44600.1.TAIR10	Ft-FtPinG0001864700.01.T01	3e-15
169- 2:	At-AT2G44620.1.TAIR10	Ft-FtPinG0001864900.01.T01	8e-53
169- 3:	At-AT2G44640.1.TAIR10	Ft-FtPinG0001865100.01.T01	1e-160
169- 4:	At-AT2G44670.1.TAIR10	Ft-FtPinG0001866100.01.T01	2e-16
169- 5:	At-AT2G44680.1.TAIR10	Ft-FtPinG0001866800.01.T01	2e-147
169- 6:	At-AT2G44710.1.TAIR10	Ft-FtPinG0001867500.01.T01	0
169- 7:	At-AT2G44740.1.TAIR10	Ft-FtPinG0001869600.01.T01	2e-78
169- 8:	At-AT2G44770.1.TAIR10	Ft-FtPinG0001870200.01.T01	6e-161
169- 9:	At-AT2G44790.1.TAIR10	Ft-FtPinG0001871000.01.T01	3e-24
169- 10:	At-AT2G44810.1.TAIR10	Ft-FtPinG0001871300.01.T01	2e-104
169- 11:	At-AT2G44830.1.TAIR10	Ft-FtPinG0001871700.01.T01	0
## Alignment 170: score=439.0 e_value=2.3e-23 N=11 At-Chr2&Ft-Ft1 minus
170- 0:	At-AT2G46150.1.TAIR10	Ft-FtPinG0009283000.01.T01	2e-31
170- 1:	At-AT2G46250.1.TAIR10	Ft-FtPinG0006435200.01.T01	6e-39
170- 2:	At-AT2G46380.1.TAIR10	Ft-FtPinG0003026600.01.T01	2e-52
170- 3:	At-AT2G46400.1.TAIR10	Ft-FtPinG0003025100.01.T01	4e-26
170- 4:	At-AT2G46530.3.TAIR10	Ft-FtPinG0000387700.01.T01	0
170- 5:	At-AT2G46590.2.TAIR10	Ft-FtPinG0000383700.01.T01	5e-43
170- 6:	At-AT2G46770.1.TAIR10	Ft-FtPinG0000381200.01.T01	7e-113
170- 7:	At-AT2G46870.1.TAIR10	Ft-FtPinG0000379300.01.T01	6e-62
170- 8:	At-AT2G47000.1.TAIR10	Ft-FtPinG0000378900.01.T01	0
170- 9:	At-AT2G47060.4.TAIR10	Ft-FtPinG0000378500.01.T01	0
170- 10:	At-AT2G47070.1.TAIR10	Ft-FtPinG0000377600.01.T01	0
## Alignment 171: score=406.0 e_value=4.1e-17 N=9 At-Chr2&Ft-Ft1 minus
171- 0:	At-AT2G36530.1.TAIR10	Ft-FtPinG0003207000.01.T01	0
171- 1:	At-AT2G36570.1.TAIR10	Ft-FtPinG0003208300.01.T01	0
171- 2:	At-AT2G36580.1.TAIR10	Ft-FtPinG0003208700.01.T01	0
171- 3:	At-AT2G36630.1.TAIR10	Ft-FtPinG0003209600.01.T01	0
171- 4:	At-AT2G36670.1.TAIR10	Ft-FtPinG0003210200.01.T01	0
171- 5:	At-AT2G36680.1.TAIR10	Ft-FtPinG0002429400.01.T01	1e-89
171- 6:	At-AT2G36750.1.TAIR10	Ft-FtPinG0002430300.01.T01	1e-55
171- 7:	At-AT2G36810.1.TAIR10	Ft-FtPinG0002430600.01.T01	0
171- 8:	At-AT2G36950.1.TAIR10	Ft-FtPinG0002433700.01.T01	4e-46
## Alignment 172: score=369.0 e_value=4.4e-14 N=8 At-Chr2&Ft-Ft1 minus
172- 0:	At-AT2G35960.1.TAIR10	Ft-FtPinG0008602500.01.T01	2e-76
172- 1:	At-AT2G35980.1.TAIR10	Ft-FtPinG0008602800.01.T01	2e-51
172- 2:	At-AT2G35990.1.TAIR10	Ft-FtPinG0008603100.01.T01	2e-109
172- 3:	At-AT2G36020.1.TAIR10	Ft-FtPinG0008604000.01.T01	1e-64
172- 4:	At-AT2G36080.1.TAIR10	Ft-FtPinG0008604500.01.T01	4e-57
172- 5:	At-AT2G36100.1.TAIR10	Ft-FtPinG0008605100.01.T01	3e-58
172- 6:	At-AT2G36160.1.TAIR10	Ft-FtPinG0008607500.01.T01	1e-91
172- 7:	At-AT2G36220.1.TAIR10	Ft-FtPinG0008610900.01.T01	4e-33
## Alignment 173: score=369.0 e_value=4.8e-15 N=8 At-Chr2&Ft-Ft1 minus
173- 0:	At-AT2G30160.1.TAIR10	Ft-FtPinG0001855000.01.T01	8e-39
173- 1:	At-AT2G30270.1.TAIR10	Ft-FtPinG0001858600.01.T01	1e-28
173- 2:	At-AT2G30300.1.TAIR10	Ft-FtPinG0001859100.01.T01	2e-140
173- 3:	At-AT2G30340.1.TAIR10	Ft-FtPinG0001859600.01.T01	4e-73
173- 4:	At-AT2G30360.1.TAIR10	Ft-FtPinG0001860600.01.T01	0
173- 5:	At-AT2G30470.1.TAIR10	Ft-FtPinG0001861200.01.T01	3e-113
173- 6:	At-AT2G30490.1.TAIR10	Ft-FtPinG0001861600.01.T01	6e-148
173- 7:	At-AT2G30500.1.TAIR10	Ft-FtPinG0001861800.01.T01	2e-16
## Alignment 174: score=350.0 e_value=1.3e-15 N=8 At-Chr2&Ft-Ft1 minus
174- 0:	At-AT2G17845.1.TAIR10	Ft-FtPinG0006185600.01.T01	6e-21
174- 1:	At-AT2G18060.1.TAIR10	Ft-FtPinG0006190400.01.T01	4e-137
174- 2:	At-AT2G18090.1.TAIR10	Ft-FtPinG0006190500.01.T01	9e-101
174- 3:	At-AT2G18100.1.TAIR10	Ft-FtPinG0006191100.01.T01	0
174- 4:	At-AT2G18140.1.TAIR10	Ft-FtPinG0005419100.01.T01	9e-142
174- 5:	At-AT2G18160.1.TAIR10	Ft-FtPinG0005418500.01.T01	4e-33
174- 6:	At-AT2G18180.1.TAIR10	Ft-FtPinG0005418300.01.T01	0
174- 7:	At-AT2G18328.1.TAIR10	Ft-FtPinG0005412400.01.T01	2e-23
## Alignment 175: score=336.0 e_value=3.4e-11 N=7 At-Chr2&Ft-Ft1 minus
175- 0:	At-AT2G21470.2.TAIR10	Ft-FtPinG0001603600.01.T01	0
175- 1:	At-AT2G21480.1.TAIR10	Ft-FtPinG0001603300.01.T01	0
175- 2:	At-AT2G21500.1.TAIR10	Ft-FtPinG0001602900.01.T01	2e-68
175- 3:	At-AT2G21510.1.TAIR10	Ft-FtPinG0001602500.01.T01	2e-168
175- 4:	At-AT2G21520.2.TAIR10	Ft-FtPinG0001602400.01.T01	3e-83
175- 5:	At-AT2G21580.1.TAIR10	Ft-FtPinG0001601400.01.T01	3e-46
175- 6:	At-AT2G21660.1.TAIR10	Ft-FtPinG0001600900.01.T01	4e-43
## Alignment 176: score=302.0 e_value=1.2e-11 N=7 At-Chr2&Ft-Ft1 minus
176- 0:	At-AT2G14910.1.TAIR10	Ft-FtPinG0001619300.01.T01	1e-139
176- 1:	At-AT2G14960.1.TAIR10	Ft-FtPinG0001619100.01.T01	0
176- 2:	At-AT2G15230.1.TAIR10	Ft-FtPinG0001617600.01.T01	0
176- 3:	At-AT2G15300.1.TAIR10	Ft-FtPinG0001614800.01.T01	0
176- 4:	At-AT2G15320.1.TAIR10	Ft-FtPinG0001611700.01.T01	2e-20
176- 5:	At-AT2G15440.1.TAIR10	Ft-FtPinG0001609900.01.T01	4e-75
[truncated: 4,451 more rows]

## Sheet: Ft-Fe
############### Parameters ###############
# MATCH_SCORE: 50
# MATCH_SIZE: 5
# GAP_PENALTY: -1
# OVERLAP_WINDOW: 5
# E_VALUE: 1e-05
# MAX GAPS: 25
############### Statistics ###############
# Number of collinear genes: 28089, Percentage: 40.31
# Number of all genes: 69683
##########################################
## Alignment 0: score=22843.0 e_value=0 N=465 Fe-GWHBJBK00000001&Ft-Ft1 plus
0- 0:	Fe-evm.model.Fe1.13818	Ft-FtPinG0000125900.01.T01	3e-84
0- 1:	Fe-evm.model.Fe1.13820	Ft-FtPinG0000126300.01.T01	0
0- 2:	Fe-evm.model.Fe1.13823	Ft-FtPinG0000127000.01.T01	0
0- 3:	Fe-evm.model.Fe1.13824	Ft-FtPinG0000127100.01.T01	4e-175
0- 4:	Fe-evm.model.Fe1.13825	Ft-FtPinG0000127400.01.T01	0
0- 5:	Fe-evm.model.Fe1.13826	Ft-FtPinG0000127800.01.T01	0
0- 6:	Fe-evm.model.Fe1.13827	Ft-FtPinG0000128000.01.T01	0
0- 7:	Fe-evm.model.Fe1.13828	Ft-FtPinG0000128400.01.T01	1e-125
0- 8:	Fe-evm.model.Fe1.13829	Ft-FtPinG0000128600.01.T01	3e-103
0- 9:	Fe-evm.model.Fe1.13830	Ft-FtPinG0000128900.01.T01	4e-89
0- 10:	Fe-evm.model.Fe1.13831	Ft-FtPinG0000129200.01.T01	5e-48
0- 11:	Fe-evm.model.Fe1.13836	Ft-FtPinG0000129300.01.T01	9e-44
0- 12:	Fe-evm.model.Fe1.13837	Ft-FtPinG0000129600.01.T01	6e-82
0- 13:	Fe-evm.model.Fe1.13838	Ft-FtPinG0000130500.01.T01	0
0- 14:	Fe-evm.model.Fe1.13839	Ft-FtPinG0000130800.01.T01	6e-129
0- 15:	Fe-evm.model.Fe1.13840	Ft-FtPinG0000131000.01.T01	0
0- 16:	Fe-evm.model.Fe1.13842	Ft-FtPinG0000131700.01.T01	3e-95
0- 17:	Fe-evm.model.Fe1.13844	Ft-FtPinG0000132200.01.T01	0
0- 18:	Fe-evm.model.Fe1.13845	Ft-FtPinG0000132300.01.T01	0
0- 19:	Fe-evm.model.Fe1.13846	Ft-FtPinG0000132600.01.T01	0
0- 20:	Fe-evm.model.Fe1.13847	Ft-FtPinG0000133000.01.T01	2e-99
0- 21:	Fe-evm.model.Fe1.13848	Ft-FtPinG0000133100.01.T01	0
0- 22:	Fe-evm.model.Fe1.13849	Ft-FtPinG0000133900.01.T01	0
0- 23:	Fe-evm.model.Fe1.13850	Ft-FtPinG0000134200.01.T01	2e-168
0- 24:	Fe-evm.model.Fe1.13851	Ft-FtPinG0000134400.01.T01	1e-153
0- 25:	Fe-evm.model.Fe1.13852	Ft-FtPinG0000134600.01.T01	3e-123
0- 26:	Fe-evm.model.Fe1.13853	Ft-FtPinG0000134700.01.T01	0
0- 27:	Fe-evm.model.Fe1.13854	Ft-FtPinG0000135000.01.T01	0
0- 28:	Fe-evm.model.Fe1.13855	Ft-FtPinG0000135200.01.T01	0
0- 29:	Fe-evm.model.Fe1.13858	Ft-FtPinG0000135300.01.T01	0
0- 30:	Fe-evm.model.Fe1.13859	Ft-FtPinG0000135500.01.T01	1e-179
0- 31:	Fe-evm.model.Fe1.13860	Ft-FtPinG0000135800.01.T01	0
0- 32:	Fe-evm.model.Fe1.13861	Ft-FtPinG0000136000.01.T02	0
0- 33:	Fe-evm.model.Fe1.13862	Ft-FtPinG0000136200.01.T01	0
0- 34:	Fe-evm.model.Fe1.13868	Ft-FtPinG0000137900.01.T01	0
0- 35:	Fe-evm.model.Fe1.13870	Ft-FtPinG0000139200.01.T01	0
0- 36:	Fe-evm.model.Fe1.13871	Ft-FtPinG0000139400.01.T01	3e-116
0- 37:	Fe-evm.model.Fe1.13876	Ft-FtPinG0000140800.01.T01	0
0- 38:	Fe-evm.model.Fe1.13879	Ft-FtPinG0000140900.01.T01	2e-147
0- 39:	Fe-evm.model.Fe1.13882	Ft-FtPinG0000141100.01.T01	6e-77
0- 40:	Fe-evm.model.Fe1.13888	Ft-FtPinG0000141400.01.T01	1e-49
0- 41:	Fe-evm.model.Fe1.13894	Ft-FtPinG0000142200.01.T01	2e-18
0- 42:	Fe-evm.model.Fe1.13897	Ft-FtPinG0000142900.01.T01	1e-114
0- 43:	Fe-evm.model.Fe1.13898	Ft-FtPinG0000143200.01.T01	1e-128
0- 44:	Fe-evm.model.Fe1.13899	Ft-FtPinG0000143500.01.T01	3e-117
0- 45:	Fe-evm.model.Fe1.13904	Ft-FtPinG0000145000.01.T01	3e-62
0- 46:	Fe-evm.model.Fe1.13906	Ft-FtPinG0000145100.01.T01	0
0- 47:	Fe-evm.model.Fe1.13908	Ft-FtPinG0000145400.01.T02	0
0- 48:	Fe-evm.model.Fe1.13912	Ft-FtPinG0000147400.01.T01	0
0- 49:	Fe-evm.model.Fe1.13914	Ft-FtPinG0000147500.01.T01	0
0- 50:	Fe-evm.model.Fe1.13915	Ft-FtPinG0000147800.01.T01	0
0- 51:	Fe-evm.model.Fe1.13917	Ft-FtPinG0000148000.01.T01	0
0- 52:	Fe-evm.model.Fe1.13918	Ft-FtPinG0000149300.01.T01	8e-84
0- 53:	Fe-evm.model.Fe1.13919	Ft-FtPinG0000149500.01.T01	0
0- 54:	Fe-evm.model.Fe1.13920	Ft-FtPinG0000149700.01.T02	0
0- 55:	Fe-evm.model.Fe1.13921	Ft-FtPinG0000150000.01.T01	0
0- 56:	Fe-evm.model.Fe1.13922	Ft-FtPinG0000150200.01.T01	0
0- 57:	Fe-evm.model.Fe1.13923	Ft-FtPinG0000150400.01.T01	0
0- 58:	Fe-evm.model.Fe1.13924	Ft-FtPinG0000150500.01.T01	0
0- 59:	Fe-evm.model.Fe1.13925	Ft-FtPinG0000150800.01.T01	0
0- 60:	Fe-evm.model.Fe1.13926	Ft-FtPinG0000151000.01.T01	0
0- 61:	Fe-evm.model.Fe1.13927	Ft-FtPinG0000151200.01.T01	4e-115
0- 62:	Fe-evm.model.Fe1.13928	Ft-FtPinG0000151300.01.T01	0
0- 63:	Fe-evm.model.Fe1.13929	Ft-FtPinG0000151500.01.T01	2e-103
0- 64:	Fe-evm.model.Fe1.13930	Ft-FtPinG0000152100.01.T01	0
0- 65:	Fe-evm.model.Fe1.13932	Ft-FtPinG0000152900.01.T01	0
0- 66:	Fe-evm.model.Fe1.13933	Ft-FtPinG0000153200.01.T01	0
0- 67:	Fe-evm.model.Fe1.13938	Ft-FtPinG0000153400.01.T01	6e-53
0- 68:	Fe-evm.model.Fe1.13939	Ft-FtPinG0000154300.01.T01	3e-47
0- 69:	Fe-evm.model.Fe1.13940	Ft-FtPinG0000154600.01.T01	0
0- 70:	Fe-evm.model.Fe1.13941	Ft-FtPinG0000154800.01.T01	0
0- 71:	Fe-evm.model.Fe1.13942	Ft-FtPinG0000154900.01.T01	1e-143
0- 72:	Fe-evm.model.Fe1.13943	Ft-FtPinG0000155400.01.T01	0
0- 73:	Fe-evm.model.Fe1.13944	Ft-FtPinG0000155600.01.T01	0
0- 74:	Fe-evm.model.Fe1.13945	Ft-FtPinG0000155700.01.T01	1e-120
0- 75:	Fe-evm.model.Fe1.13946	Ft-FtPinG0000156000.01.T01	9e-33
0- 76:	Fe-evm.model.Fe1.13947	Ft-FtPinG0000156100.01.T01	0
0- 77:	Fe-evm.model.Fe1.13948	Ft-FtPinG0000156400.01.T01	1e-150
0- 78:	Fe-evm.model.Fe1.13949	Ft-FtPinG0000156500.01.T01	1e-153
0- 79:	Fe-evm.model.Fe1.13950	Ft-FtPinG0000156700.01.T01	0
0- 80:	Fe-evm.model.Fe1.13953	Ft-FtPinG0000156900.01.T01	0
0- 81:	Fe-evm.model.Fe1.13954	Ft-FtPinG0000157100.01.T01	0
0- 82:	Fe-evm.model.Fe1.13955	Ft-FtPinG0000157300.01.T01	0
0- 83:	Fe-evm.model.Fe1.13960	Ft-FtPinG0000158300.01.T02	9e-136
0- 84:	Fe-evm.model.Fe1.13961	Ft-FtPinG0000158600.01.T01	5e-179
0- 85:	Fe-evm.model.Fe1.13964	Ft-FtPinG0000159100.01.T01	1e-115
0- 86:	Fe-evm.model.Fe1.13965	Ft-FtPinG0000159700.01.T01	3e-126
0- 87:	Fe-evm.model.Fe1.13966	Ft-FtPinG0000160000.01.T01	3e-163
0- 88:	Fe-evm.model.Fe1.13967	Ft-FtPinG0000161000.01.T01	0
0- 89:	Fe-evm.model.Fe1.13968	Ft-FtPinG0000161100.01.T01	4e-96
0- 90:	Fe-evm.model.Fe1.13969	Ft-FtPinG0000161300.01.T01	0
0- 91:	Fe-evm.model.Fe1.13972	Ft-FtPinG0000162300.01.T01	0
0- 92:	Fe-evm.model.Fe1.13973	Ft-FtPinG0000162600.01.T01	0
0- 93:	Fe-evm.model.Fe1.13976	Ft-FtPinG0000163200.01.T01	0
0- 94:	Fe-evm.model.Fe1.13979	Ft-FtPinG0000163500.01.T01	0
0- 95:	Fe-evm.model.Fe1.13980	Ft-FtPinG0000164400.01.T01	0
0- 96:	Fe-evm.model.Fe1.13981	Ft-FtPinG0000165100.01.T01	0
0- 97:	Fe-evm.model.Fe1.13982	Ft-FtPinG0000165400.01.T01	0
0- 98:	Fe-evm.model.Fe1.13984	Ft-FtPinG0000165500.01.T01	0
0- 99:	Fe-evm.model.Fe1.13985	Ft-FtPinG0000166300.01.T01	0
0-100:	Fe-evm.model.Fe1.13986	Ft-FtPinG0000166500.01.T02	0
0-101:	Fe-evm.model.Fe1.13989	Ft-FtPinG0000168500.01.T01	0
0-102:	Fe-evm.model.Fe1.13992	Ft-FtPinG0000168900.01.T01	0
0-103:	Fe-evm.model.Fe1.13993	Ft-FtPinG0000169100.01.T01	0
0-104:	Fe-evm.model.Fe1.13994	Ft-FtPinG0000169400.01.T01	5e-71
0-105:	Fe-evm.model.Fe1.13996	Ft-FtPinG0000169500.01.T01	0
0-106:	Fe-evm.model.Fe1.14007	Ft-FtPinG0000170500.01.T01	1e-110
0-107:	Fe-evm.model.Fe1.14008	Ft-FtPinG0000170800.01.T01	0
0-108:	Fe-evm.model.Fe1.14009	Ft-FtPinG0000171000.01.T01	0
0-109:	Fe-evm.model.Fe1.14012	Ft-FtPinG0000171400.01.T01	8e-77
0-110:	Fe-evm.model.Fe1.14015	Ft-FtPinG0000171800.01.T01	0
0-111:	Fe-evm.model.Fe1.14017	Ft-FtPinG0000173100.01.T01	0
0-112:	Fe-evm.model.Fe1.14018	Ft-FtPinG0000173400.01.T01	1e-135
0-113:	Fe-evm.model.Fe1.14019	Ft-FtPinG0000173600.01.T01	0
0-114:	Fe-evm.model.Fe1.14020	Ft-FtPinG0000173700.01.T01	9e-156
0-115:	Fe-evm.model.Fe1.14023	Ft-FtPinG0000174400.01.T01	9e-156
0-116:	Fe-evm.model.Fe1.14024	Ft-FtPinG0000174500.01.T01	0
0-117:	Fe-evm.model.Fe1.14025	Ft-FtPinG0000174800.01.T01	0
0-118:	Fe-evm.model.Fe1.14026	Ft-FtPinG0000175000.01.T01	3e-172
0-119:	Fe-evm.model.Fe1.14027	Ft-FtPinG0000175200.01.T01	0
0-120:	Fe-evm.model.Fe1.14035	Ft-FtPinG0000175700.01.T01	0
0-121:	Fe-evm.model.Fe1.14037	Ft-FtPinG0000176500.01.T01	0
0-122:	Fe-evm.model.Fe1.14038	Ft-FtPinG0000176800.01.T01	0
0-123:	Fe-evm.model.Fe1.14041	Ft-FtPinG0000177700.01.T01	1e-27
0-124:	Fe-evm.model.Fe1.14049	Ft-FtPinG0000179600.01.T01	0
0-125:	Fe-evm.model.Fe1.14050	Ft-FtPinG0000179900.01.T01	0
0-126:	Fe-evm.model.Fe1.14051	Ft-FtPinG0000180200.01.T01	0
0-127:	Fe-evm.model.Fe1.14053	Ft-FtPinG0000180400.01.T01	0
0-128:	Fe-evm.model.Fe1.14054	Ft-FtPinG0000180500.01.T01	0
0-129:	Fe-evm.model.Fe1.14055	Ft-FtPinG0000180700.01.T02	3e-80
0-130:	Fe-evm.model.Fe1.14056	Ft-FtPinG0000181000.01.T01	0
0-131:	Fe-evm.model.Fe1.14057	Ft-FtPinG0000181800.01.T01	1e-79
0-132:	Fe-evm.model.Fe1.14060	Ft-FtPinG0000183800.01.T01	0
0-133:	Fe-evm.model.Fe1.14061	Ft-FtPinG0000184200.01.T01	0
0-134:	Fe-evm.model.Fe1.14062	Ft-FtPinG0000184900.01.T01	0
0-135:	Fe-evm.model.Fe1.14064	Ft-FtPinG0000185100.01.T01	4e-116
0-136:	Fe-evm.model.Fe1.14065	Ft-FtPinG0000185600.01.T01	0
0-137:	Fe-evm.model.Fe1.14066	Ft-FtPinG0000185700.01.T01	5e-82
0-138:	Fe-evm.model.Fe1.14067	Ft-FtPinG0000186400.01.T01	3e-156
0-139:	Fe-evm.model.Fe1.14068	Ft-FtPinG0000186600.01.T01	2e-126
0-140:	Fe-evm.model.Fe1.14069	Ft-FtPinG0000186700.01.T01	0
0-141:	Fe-evm.model.Fe1.14072	Ft-FtPinG0000187200.01.T01	0
0-142:	Fe-evm.model.Fe1.14076	Ft-FtPinG0000188600.01.T01	0
0-143:	Fe-evm.model.Fe1.14078	Ft-FtPinG0000194700.01.T01	0
0-144:	Fe-evm.model.Fe1.14079	Ft-FtPinG0000195000.01.T01	0
0-145:	Fe-evm.model.Fe1.14082	Ft-FtPinG0000195400.01.T01	0
0-146:	Fe-evm.model.Fe1.14085	Ft-FtPinG0000196100.01.T01	0
0-147:	Fe-evm.model.Fe1.14086	Ft-FtPinG0000196400.01.T01	0
0-148:	Fe-evm.model.Fe1.14088	Ft-FtPinG0000196700.01.T01	0
0-149:	Fe-evm.model.Fe1.14091	Ft-FtPinG0000196900.01.T01	2e-161
0-150:	Fe-evm.model.Fe1.14094	Ft-FtPinG0000197300.01.T01	0
0-151:	Fe-evm.model.Fe1.14099	Ft-FtPinG0000198300.01.T01	0
0-152:	Fe-evm.model.Fe1.14107	Ft-FtPinG0000198700.01.T01	0
0-153:	Fe-evm.model.Fe1.14108	Ft-FtPinG0000198900.01.T01	0
0-154:	Fe-evm.model.Fe1.14109	Ft-FtPinG0000199200.01.T01	3e-60
0-155:	Fe-evm.model.Fe1.14111	Ft-FtPinG0000199500.01.T01	1e-88
0-156:	Fe-evm.model.Fe1.14112	Ft-FtPinG0000199800.01.T01	0
0-157:	Fe-evm.model.Fe1.14113	Ft-FtPinG0000200000.01.T01	0
0-158:	Fe-evm.model.Fe1.14114	Ft-FtPinG0000200200.01.T01	0
0-159:	Fe-evm.model.Fe1.14116	Ft-FtPinG0000200500.01.T01	0
0-160:	Fe-evm.model.Fe1.14117	Ft-FtPinG0000200900.01.T01	4e-158
0-161:	Fe-evm.model.Fe1.14118	Ft-FtPinG0000202100.01.T01	1e-54
0-162:	Fe-evm.model.Fe1.14119	Ft-FtPinG0000202400.01.T01	1e-86
0-163:	Fe-evm.model.Fe1.14120	Ft-FtPinG0000203200.01.T01	6e-72
0-164:	Fe-evm.model.Fe1.14121	Ft-FtPinG0000204200.01.T01	0
0-165:	Fe-evm.model.Fe1.14122	Ft-FtPinG0000204700.01.T01	3e-164
0-166:	Fe-evm.model.Fe1.14124	Ft-FtPinG0000206800.01.T01	0
0-167:	Fe-evm.model.Fe1.14125	Ft-FtPinG0000206900.01.T01	0
0-168:	Fe-evm.model.Fe1.14126	Ft-FtPinG0000207100.01.T01	0
0-169:	Fe-evm.model.Fe1.14127	Ft-FtPinG0000207400.01.T01	0
0-170:	Fe-evm.model.Fe1.14128	Ft-FtPinG0000207600.01.T01	2e-158
0-171:	Fe-evm.model.Fe1.14129	Ft-FtPinG0000208900.01.T01	0
0-172:	Fe-evm.model.Fe1.14134	Ft-FtPinG0000209300.01.T01	0
0-173:	Fe-evm.model.Fe1.14138	Ft-FtPinG0000209500.01.T01	0
0-174:	Fe-evm.model.Fe1.14149	Ft-FtPinG0000210200.01.T01	3e-19
0-175:	Fe-evm.model.Fe1.14157	Ft-FtPinG0000211700.01.T01	0
0-176:	Fe-evm.model.Fe1.14158	Ft-FtPinG0000211900.01.T01	4e-129
0-177:	Fe-evm.model.Fe1.14159	Ft-FtPinG0000212200.01.T01	0
0-178:	Fe-evm.model.Fe1.14160	Ft-FtPinG0000212400.01.T01	0
0-179:	Fe-evm.model.Fe1.14162	Ft-FtPinG0000213100.01.T01	0
0-180:	Fe-evm.model.Fe1.14163	Ft-FtPinG0000213400.01.T01	2e-129
0-181:	Fe-evm.model.Fe1.14165	Ft-FtPinG0000213800.01.T01	0
0-182:	Fe-evm.model.Fe1.14166	Ft-FtPinG0000213900.01.T01	0
0-183:	Fe-evm.model.Fe1.14168	Ft-FtPinG0000214700.01.T01	0
0-184:	Fe-evm.model.Fe1.14169	Ft-FtPinG0000215500.01.T01	0
0-185:	Fe-evm.model.Fe1.14171	Ft-FtPinG0000215900.01.T01	0
0-186:	Fe-evm.model.Fe1.14172	Ft-FtPinG0000216200.01.T01	0
0-187:	Fe-evm.model.Fe1.14174	Ft-FtPinG0000217100.01.T01	0
0-188:	Fe-evm.model.Fe1.14175	Ft-FtPinG0000217400.01.T01	8e-149
0-189:	Fe-evm.model.Fe1.14178	Ft-FtPinG0000219600.01.T01	3e-69
0-190:	Fe-evm.model.Fe1.14181	Ft-FtPinG0000220600.01.T01	0
0-191:	Fe-evm.model.Fe1.14187	Ft-FtPinG0000222500.01.T02	1e-85
0-192:	Fe-evm.model.Fe1.14203	Ft-FtPinG0000227200.01.T01	5e-138
0-193:	Fe-evm.model.Fe1.14205	Ft-FtPinG0000228000.01.T01	8e-98
0-194:	Fe-evm.model.Fe1.14208	Ft-FtPinG0000228200.01.T01	1e-173
0-195:	Fe-evm.model.Fe1.14215	Ft-FtPinG0000230100.01.T01	0
0-196:	Fe-evm.model.Fe1.14216	Ft-FtPinG0000230400.01.T01	0
0-197:	Fe-evm.model.Fe1.14217	Ft-FtPinG0000230600.01.T01	0
0-198:	Fe-evm.model.Fe1.14219	Ft-FtPinG0000231100.01.T01	4e-100
0-199:	Fe-evm.model.Fe1.14226	Ft-FtPinG0000238700.01.T01	0
0-200:	Fe-evm.model.Fe1.14227	Ft-FtPinG0000238900.01.T01	0
0-201:	Fe-evm.model.Fe1.14228	Ft-FtPinG0000239200.01.T01	0
0-202:	Fe-evm.model.Fe1.14229	Ft-FtPinG0000239300.01.T01	2e-138
0-203:	Fe-evm.model.Fe1.14230	Ft-FtPinG0000240100.01.T01	0
0-204:	Fe-evm.model.Fe1.14231	Ft-FtPinG0000240300.01.T01	0
0-205:	Fe-evm.model.Fe1.14232	Ft-FtPinG0000240600.01.T01	5e-99
0-206:	Fe-evm.model.Fe1.14234	Ft-FtPinG0000241000.01.T01	0
0-207:	Fe-evm.model.Fe1.14235	Ft-FtPinG0000241100.01.T01	0
0-208:	Fe-evm.model.Fe1.14238	Ft-FtPinG0000241400.01.T01	0
0-209:	Fe-evm.model.Fe1.14242	Ft-FtPinG0000244100.01.T01	0
0-210:	Fe-evm.model.Fe1.14243	Ft-FtPinG0000244400.01.T01	6e-173
0-211:	Fe-evm.model.Fe1.14245	Ft-FtPinG0000244500.01.T01	0
0-212:	Fe-evm.model.Fe1.14246	Ft-FtPinG0000244700.01.T01	0
0-213:	Fe-evm.model.Fe1.14248	Ft-FtPinG0000246400.01.T01	0
0-214:	Fe-evm.model.Fe1.14250	Ft-FtPinG0000248900.01.T01	0
0-215:	Fe-evm.model.Fe1.14252	Ft-FtPinG0000249100.01.T01	0
0-216:	Fe-evm.model.Fe1.14253	Ft-FtPinG0000249300.01.T01	8e-170
0-217:	Fe-evm.model.Fe1.14254	Ft-FtPinG0000249600.01.T01	0
0-218:	Fe-evm.model.Fe1.14255	Ft-FtPinG0000249800.01.T01	2e-156
0-219:	Fe-evm.model.Fe1.14256	Ft-FtPinG0000250600.01.T01	0
0-220:	Fe-evm.model.Fe1.14257	Ft-FtPinG0000250700.01.T01	1e-177
0-221:	Fe-evm.model.Fe1.14258	Ft-FtPinG0000251000.01.T01	0
0-222:	Fe-evm.model.Fe1.14259	Ft-FtPinG0000251100.01.T01	4e-112
0-223:	Fe-evm.model.Fe1.14260	Ft-FtPinG0000251300.01.T01	4e-73
0-224:	Fe-evm.model.Fe1.14261	Ft-FtPinG0000251600.01.T01	3e-98
0-225:	Fe-evm.model.Fe1.14263	Ft-FtPinG0000252000.01.T01	0
0-226:	Fe-evm.model.Fe1.14266	Ft-FtPinG0000252100.01.T01	0
0-227:	Fe-evm.model.Fe1.14269	Ft-FtPinG0000255100.01.T01	0
0-228:	Fe-evm.model.Fe1.14271	Ft-FtPinG0000255600.01.T01	0
0-229:	Fe-evm.model.Fe1.14272	Ft-FtPinG0000255800.01.T01	0
0-230:	Fe-evm.model.Fe1.14273	Ft-FtPinG0000259500.01.T01	0
0-231:	Fe-evm.model.Fe1.14274	Ft-FtPinG0000259800.01.T01	0
0-232:	Fe-evm.model.Fe1.14276	Ft-FtPinG0000259900.01.T01	5e-96
0-233:	Fe-evm.model.Fe1.14278	Ft-FtPinG0000260200.01.T02	0
0-234:	Fe-evm.model.Fe1.14283	Ft-FtPinG0000260400.01.T02	0
0-235:	Fe-evm.model.Fe1.14288	Ft-FtPinG0000260600.01.T01	0
0-236:	Fe-evm.model.Fe1.14291	Ft-FtPinG0000263500.01.T01	0
0-237:	Fe-evm.model.Fe1.14292	Ft-FtPinG0000263800.01.T02	1e-174
0-238:	Fe-evm.model.Fe1.14293	Ft-FtPinG0000264300.01.T01	0
0-239:	Fe-evm.model.Fe1.14295	Ft-FtPinG0000264600.01.T01	0
0-240:	Fe-evm.model.Fe1.14297	Ft-FtPinG0000264800.01.T01	0
0-241:	Fe-evm.model.Fe1.14298	Ft-FtPinG0000265000.01.T01	2e-70
0-242:	Fe-evm.model.Fe1.14301	Ft-FtPinG0000265300.01.T01	0
0-243:	Fe-evm.model.Fe1.14302	Ft-FtPinG0000265500.01.T01	0
0-244:	Fe-evm.model.Fe1.14303	Ft-FtPinG0000265700.01.T01	0
0-245:	Fe-evm.model.Fe1.14304	Ft-FtPinG0000266600.01.T01	2e-163
0-246:	Fe-evm.model.Fe1.14305	Ft-FtPinG0000266800.01.T01	0
0-247:	Fe-evm.model.Fe1.14306	Ft-FtPinG0000267100.01.T01	0
0-248:	Fe-evm.model.Fe1.14308	Ft-FtPinG0000267300.01.T01	3e-156
0-249:	Fe-evm.model.Fe1.14309	Ft-FtPinG0000267800.01.T01	0
0-250:	Fe-evm.model.Fe1.14310	Ft-FtPinG0000268200.01.T01	0
0-251:	Fe-evm.model.Fe1.14311	Ft-FtPinG0000269000.01.T01	0
0-252:	Fe-evm.model.Fe1.14313	Ft-FtPinG0000269800.01.T01	0
0-253:	Fe-evm.model.Fe1.14314	Ft-FtPinG0000270000.01.T01	0
0-254:	Fe-evm.model.Fe1.14315	Ft-FtPinG0000270200.01.T01	0
0-255:	Fe-evm.model.Fe1.14317	Ft-FtPinG0000271100.01.T01	0
0-256:	Fe-evm.model.Fe1.14319	Ft-FtPinG0000271800.01.T01	1e-85
0-257:	Fe-evm.model.Fe1.14320	Ft-FtPinG0000271900.01.T01	1e-177
0-258:	Fe-evm.model.Fe1.14321	Ft-FtPinG0000273100.01.T01	8e-88
0-259:	Fe-evm.model.Fe1.14324	Ft-FtPinG0000273400.01.T01	8e-167
0-260:	Fe-evm.model.Fe1.14325	Ft-FtPinG0000273600.01.T01	0
0-261:	Fe-evm.model.Fe1.14327	Ft-FtPinG0000274100.01.T01	2e-142
0-262:	Fe-evm.model.Fe1.14329	Ft-FtPinG0000274300.01.T01	5e-166
0-263:	Fe-evm.model.Fe1.14332	Ft-FtPinG0000276100.01.T01	0
0-264:	Fe-evm.model.Fe1.14336	Ft-FtPinG0000278200.01.T01	0
0-265:	Fe-evm.model.Fe1.14337	Ft-FtPinG0000278400.01.T01	0
0-266:	Fe-evm.model.Fe1.14338	Ft-FtPinG0000280000.01.T01	3e-138
0-267:	Fe-evm.model.Fe1.14339	Ft-FtPinG0000281200.01.T01	0
0-268:	Fe-evm.model.Fe1.14341	Ft-FtPinG0000281400.01.T01	0
0-269:	Fe-evm.model.Fe1.14342	Ft-FtPinG0000284100.01.T01	2e-179
0-270:	Fe-evm.model.Fe1.14343	Ft-FtPinG0000284300.01.T01	0
0-271:	Fe-evm.model.Fe1.14344	Ft-FtPinG0000285500.01.T01	2e-54
0-272:	Fe-evm.model.Fe1.14345	Ft-FtPinG0000285800.01.T01	4e-62
0-273:	Fe-evm.model.Fe1.14346	Ft-FtPinG0000286400.01.T01	1e-161
0-274:	Fe-evm.model.Fe1.14347	Ft-FtPinG0000286500.01.T01	0
0-275:	Fe-evm.model.Fe1.14348	Ft-FtPinG0000286700.01.T01	0
0-276:	Fe-evm.model.Fe1.14350	Ft-FtPinG0000287200.01.T01	0
0-277:	Fe-evm.model.Fe1.14353	Ft-FtPinG0000291600.01.T01	3e-14
0-278:	Fe-evm.model.Fe1.14354	Ft-FtPinG0000291700.01.T01	0
0-279:	Fe-evm.model.Fe1.14358	Ft-FtPinG0000292800.01.T01	0
0-280:	Fe-evm.model.Fe1.14359	Ft-FtPinG0000293600.01.T01	1e-43
0-281:	Fe-evm.model.Fe1.14360	Ft-FtPinG0000293800.01.T01	2e-54
0-282:	Fe-evm.model.Fe1.14361	Ft-FtPinG0000293900.01.T01	2e-126
0-283:	Fe-evm.model.Fe1.14362	Ft-FtPinG0000294100.01.T01	0
0-284:	Fe-evm.model.Fe1.14363	Ft-FtPinG0000294900.01.T01	2e-89
0-285:	Fe-evm.model.Fe1.14364	Ft-FtPinG0000295100.01.T01	2e-49
0-286:	Fe-evm.model.Fe1.14366	Ft-FtPinG0000296000.01.T01	1e-108
0-287:	Fe-evm.model.Fe1.14368	Ft-FtPinG0000296100.01.T01	0
0-288:	Fe-evm.model.Fe1.14369	Ft-FtPinG0000296300.01.T01	0
0-289:	Fe-evm.model.Fe1.14370	Ft-FtPinG0000297300.01.T01	0
0-290:	Fe-evm.model.Fe1.14371	Ft-FtPinG0000297600.01.T01	0
0-291:	Fe-evm.model.Fe1.14372	Ft-FtPinG0000297800.01.T01	0
0-292:	Fe-evm.model.Fe1.14373	Ft-FtPinG0000298000.01.T01	2e-147
0-293:	Fe-evm.model.Fe1.14374	Ft-FtPinG0000298100.01.T01	0
0-294:	Fe-evm.model.Fe1.14375	Ft-FtPinG0000298400.01.T01	3e-66
0-295:	Fe-evm.model.Fe1.14376	Ft-FtPinG0000299100.01.T01	0
0-296:	Fe-evm.model.Fe1.14377	Ft-FtPinG0000299300.01.T01	0
0-297:	Fe-evm.model.Fe1.14378	Ft-FtPinG0000299600.01.T01	1e-72
0-298:	Fe-evm.model.Fe1.14379	Ft-FtPinG0000299700.01.T01	0
0-299:	Fe-evm.model.Fe1.14380	Ft-FtPinG0000300300.01.T01	1e-70
0-300:	Fe-evm.model.Fe1.14381	Ft-FtPinG0000303400.01.T01	2e-59
0-301:	Fe-evm.model.Fe1.14385	Ft-FtPinG0000314000.01.T01	5e-105
0-302:	Fe-evm.model.Fe1.14392	Ft-FtPinG0000315200.01.T01	8e-101
0-303:	Fe-evm.model.Fe1.14396	Ft-FtPinG0000315900.01.T01	0
0-304:	Fe-evm.model.Fe1.14397	Ft-FtPinG0000316100.01.T01	0
0-305:	Fe-evm.model.Fe1.14398	Ft-FtPinG0000317500.01.T01	6e-143
0-306:	Fe-evm.model.Fe1.14401	Ft-FtPinG0000317900.01.T01	4e-178
0-307:	Fe-evm.model.Fe1.14403	Ft-FtPinG0000318200.01.T01	0
0-308:	Fe-evm.model.Fe1.14406	Ft-FtPinG0000318300.01.T01	0
0-309:	Fe-evm.model.Fe1.14407	Ft-FtPinG0000318500.01.T01	0
0-310:	Fe-evm.model.Fe1.14409	Ft-FtPinG0000319200.01.T01	0
0-311:	Fe-evm.model.Fe1.14410	Ft-FtPinG0000319300.01.T01	4e-100
0-312:	Fe-evm.model.Fe1.14416	Ft-FtPinG0000320700.01.T01	0
0-313:	Fe-evm.model.Fe1.14419	Ft-FtPinG0000321100.01.T01	4e-39
0-314:	Fe-evm.model.Fe1.14420	Ft-FtPinG0000321300.01.T01	0
0-315:	Fe-evm.model.Fe1.14423	Ft-FtPinG0000323100.01.T01	1e-44
0-316:	Fe-evm.model.Fe1.14425	Ft-FtPinG0000323600.01.T01	4e-63
0-317:	Fe-evm.model.Fe1.14426	Ft-FtPinG0000323800.01.T01	0
0-318:	Fe-evm.model.Fe1.14427	Ft-FtPinG0000324000.01.T01	0
0-319:	Fe-evm.model.Fe1.14428	Ft-FtPinG0000324200.01.T01	1e-138
0-320:	Fe-evm.model.Fe1.14429	Ft-FtPinG0000325000.01.T01	0
0-321:	Fe-evm.model.Fe1.14430	Ft-FtPinG0000325500.01.T01	0
0-322:	Fe-evm.model.Fe1.14431	Ft-FtPinG0000325700.01.T01	0
0-323:	Fe-evm.model.Fe1.14434	Ft-FtPinG0001378700.01.T01	0
0-324:	Fe-evm.model.Fe1.14436	Ft-FtPinG0001378900.01.T01	0
0-325:	Fe-evm.model.Fe1.14437	Ft-FtPinG0001379200.01.T01	1e-86
0-326:	Fe-evm.model.Fe1.14439	Ft-FtPinG0001379500.01.T01	0
0-327:	Fe-evm.model.Fe1.14440	Ft-FtPinG0001379800.01.T01	0
0-328:	Fe-evm.model.Fe1.14441	Ft-FtPinG0001379900.01.T01	0
0-329:	Fe-evm.model.Fe1.14442	Ft-FtPinG0001380200.01.T01	0
0-330:	Fe-evm.model.Fe1.14445	Ft-FtPinG0001380300.01.T01	8e-123
0-331:	Fe-evm.model.Fe1.14452	Ft-FtPinG0001380500.01.T01	2e-133
0-332:	Fe-evm.model.Fe1.14453	Ft-FtPinG0001380800.01.T01	0
0-333:	Fe-evm.model.Fe1.14456	Ft-FtPinG0001381100.01.T01	3e-167
0-334:	Fe-evm.model.Fe1.14458	Ft-FtPinG0001381600.01.T01	2e-110
0-335:	Fe-evm.model.Fe1.14459	Ft-FtPinG0001381700.01.T01	0
0-336:	Fe-evm.model.Fe1.14460	Ft-FtPinG0001382200.01.T01	1e-77
0-337:	Fe-evm.model.Fe1.14461	Ft-FtPinG0001382400.01.T01	0
0-338:	Fe-evm.model.Fe1.14462	Ft-FtPinG0001382800.01.T01	0
0-339:	Fe-evm.model.Fe1.14463	Ft-FtPinG0001383100.01.T01	0
0-340:	Fe-evm.model.Fe1.14464	Ft-FtPinG0001383600.01.T01	0
0-341:	Fe-evm.model.Fe1.14465	Ft-FtPinG0001383800.01.T01	7e-139
0-342:	Fe-evm.model.Fe1.14466	Ft-FtPinG0001383900.01.T01	0
0-343:	Fe-evm.model.Fe1.14468	Ft-FtPinG0001384600.01.T01	0
0-344:	Fe-evm.model.Fe1.14476	Ft-FtPinG0001384900.01.T01	8e-102
0-345:	Fe-evm.model.Fe1.14478	Ft-FtPinG0001385300.01.T01	1e-160
0-346:	Fe-evm.model.Fe1.14483	Ft-FtPinG0001387700.01.T01	0
0-347:	Fe-evm.model.Fe1.14484	Ft-FtPinG0001388400.01.T01	0
0-348:	Fe-evm.model.Fe1.14486	Ft-FtPinG0001388600.01.T01	0
0-349:	Fe-evm.model.Fe1.14489	Ft-FtPinG0001389000.01.T01	0
0-350:	Fe-evm.model.Fe1.14491	Ft-FtPinG0001389400.01.T01	0
0-351:	Fe-evm.model.Fe1.14493	Ft-FtPinG0001389600.01.T01	0
0-352:	Fe-evm.model.Fe1.14494	Ft-FtPinG0001389700.01.T01	2e-180
0-353:	Fe-evm.model.Fe1.14495	Ft-FtPinG0001389900.01.T01	0
0-354:	Fe-evm.model.Fe1.14496	Ft-FtPinG0001390200.01.T01	2e-170
0-355:	Fe-evm.model.Fe1.14497	Ft-FtPinG0001391700.01.T01	0
0-356:	Fe-evm.model.Fe1.14498	Ft-FtPinG0001392000.01.T02	0
0-357:	Fe-evm.model.Fe1.14499	Ft-FtPinG0001392100.01.T01	0
0-358:	Fe-evm.model.Fe1.14500	Ft-FtPinG0001392300.01.T01	0
0-359:	Fe-evm.model.Fe1.14501	Ft-FtPinG0001392500.01.T01	5e-130
0-360:	Fe-evm.model.Fe1.14503	Ft-FtPinG0001393100.01.T01	0
0-361:	Fe-evm.model.Fe1.14505	Ft-FtPinG0001393500.01.T01	0
0-362:	Fe-evm.model.Fe1.14506	Ft-FtPinG0001393800.01.T01	0
0-363:	Fe-evm.model.Fe1.14507	Ft-FtPinG0001394000.01.T01	0
0-364:	Fe-evm.model.Fe1.14508	Ft-FtPinG0001394200.01.T01	0
0-365:	Fe-evm.model.Fe1.14509	Ft-FtPinG0001394400.01.T01	0
0-366:	Fe-evm.model.Fe1.14510	Ft-FtPinG0001395000.01.T01	0
0-367:	Fe-evm.model.Fe1.14511	Ft-FtPinG0001395200.01.T01	0
0-368:	Fe-evm.model.Fe1.14513	Ft-FtPinG0001395300.01.T01	0
0-369:	Fe-evm.model.Fe1.14514	Ft-FtPinG0001395700.01.T01	0
0-370:	Fe-evm.model.Fe1.14515	Ft-FtPinG0001396800.01.T01	1e-59
0-371:	Fe-evm.model.Fe1.14516	Ft-FtPinG0001396900.01.T01	0
0-372:	Fe-evm.model.Fe1.14517	Ft-FtPinG0001397700.01.T01	8e-155
0-373:	Fe-evm.model.Fe1.14518	Ft-FtPinG0001397900.01.T01	2e-80
0-374:	Fe-evm.model.Fe1.14519	Ft-FtPinG0001398200.01.T01	2e-69
0-375:	Fe-evm.model.Fe1.14520	Ft-FtPinG0001398900.01.T01	0
0-376:	Fe-evm.model.Fe1.14521	Ft-FtPinG0001399900.01.T01	0
0-377:	Fe-evm.model.Fe1.14522	Ft-FtPinG0001400200.01.T01	0
0-378:	Fe-evm.model.Fe1.14524	Ft-FtPinG0001400400.01.T01	4e-40
0-379:	Fe-evm.model.Fe1.14525	Ft-FtPinG0001400600.01.T01	0
0-380:	Fe-evm.model.Fe1.14526	Ft-FtPinG0001400800.01.T01	0
0-381:	Fe-evm.model.Fe1.14527	Ft-FtPinG0001401000.01.T01	0
0-382:	Fe-evm.model.Fe1.14528	Ft-FtPinG0001401100.01.T01	9e-91
0-383:	Fe-evm.model.Fe1.14530	Ft-FtPinG0001401400.01.T01	0
0-384:	Fe-evm.model.Fe1.14531	Ft-FtPinG0001401600.01.T01	0
0-385:	Fe-evm.model.Fe1.14534	Ft-FtPinG0001401800.01.T01	4e-92
0-386:	Fe-evm.model.Fe1.14535	Ft-FtPinG0001402000.01.T01	0
0-387:	Fe-evm.model.Fe1.14536	Ft-FtPinG0001402400.01.T01	9e-130
0-388:	Fe-evm.model.Fe1.14537	Ft-FtPinG0001402500.01.T01	0
0-389:	Fe-evm.model.Fe1.14539	Ft-FtPinG0001402800.01.T01	4e-87
0-390:	Fe-evm.model.Fe1.14540	Ft-FtPinG0001403000.01.T01	0
0-391:	Fe-evm.model.Fe1.14541	Ft-FtPinG0001403600.01.T01	0
0-392:	Fe-evm.model.Fe1.14542	Ft-FtPinG0001403900.01.T01	6e-89
0-393:	Fe-evm.model.Fe1.14543	Ft-FtPinG0001404100.01.T01	0
0-394:	Fe-evm.model.Fe1.14544	Ft-FtPinG0001404500.01.T01	2e-163
0-395:	Fe-evm.model.Fe1.14545	Ft-FtPinG0001404800.01.T01	0
0-396:	Fe-evm.model.Fe1.14546	Ft-FtPinG0001405400.01.T01	2e-69
0-397:	Fe-evm.model.Fe1.14547	Ft-FtPinG0001405500.01.T01	0
0-398:	Fe-evm.model.Fe1.14548	Ft-FtPinG0001405800.01.T01	1e-74
0-399:	Fe-evm.model.Fe1.14549	Ft-FtPinG0001406000.01.T01	0
0-400:	Fe-evm.model.Fe1.14550	Ft-FtPinG0001406100.01.T01	0
0-401:	Fe-evm.model.Fe1.14552	Ft-FtPinG0001406400.01.T01	0
0-402:	Fe-evm.model.Fe1.14553	Ft-FtPinG0001406600.01.T01	0
0-403:	Fe-evm.model.Fe1.14555	Ft-FtPinG0001406800.01.T01	0
0-404:	Fe-evm.model.Fe1.14556	Ft-FtPinG0001406900.01.T01	0
0-405:	Fe-evm.model.Fe1.14558	Ft-FtPinG0001407600.01.T01	1e-138
0-406:	Fe-evm.model.Fe1.14559	Ft-FtPinG0001407700.01.T01	8e-155
0-407:	Fe-evm.model.Fe1.14560	Ft-FtPinG0001408000.01.T01	1e-32
0-408:	Fe-evm.model.Fe1.14561	Ft-FtPinG0001408600.01.T01	3e-133
0-409:	Fe-evm.model.Fe1.14562	Ft-FtPinG0001409100.01.T01	0
0-410:	Fe-evm.model.Fe1.14563	Ft-FtPinG0001409500.01.T01	3e-142
0-411:	Fe-evm.model.Fe1.14565	Ft-FtPinG0001409800.01.T01	0
0-412:	Fe-evm.model.Fe1.14566	Ft-FtPinG0001410100.01.T01	0
0-413:	Fe-evm.model.Fe1.14567	Ft-FtPinG0001410700.01.T01	0
0-414:	Fe-evm.model.Fe1.14568	Ft-FtPinG0001411000.01.T01	6e-174
0-415:	Fe-evm.model.Fe1.14569	Ft-FtPinG0001411200.01.T01	6e-109
0-416:	Fe-evm.model.Fe1.14572	Ft-FtPinG0001411500.01.T01	1e-128
0-417:	Fe-evm.model.Fe1.14574	Ft-FtPinG0001411900.01.T01	0
0-418:	Fe-evm.model.Fe1.14576	Ft-FtPinG0001412100.01.T01	0
0-419:	Fe-evm.model.Fe1.14577	Ft-FtPinG0001412400.01.T01	1e-78
0-420:	Fe-evm.model.Fe1.14580	Ft-FtPinG0001412600.01.T01	1e-123
0-421:	Fe-evm.model.Fe1.14582	Ft-FtPinG0001413000.01.T01	0
0-422:	Fe-evm.model.Fe1.14584	Ft-FtPinG0001413200.01.T01	1e-56
0-423:	Fe-evm.model.Fe1.14589	Ft-FtPinG0001413900.01.T01	3e-156
0-424:	Fe-evm.model.Fe1.14590	Ft-FtPinG0001414100.01.T01	0
0-425:	Fe-evm.model.Fe1.14591	Ft-FtPinG0001414500.01.T01	6e-155
0-426:	Fe-evm.model.Fe1.14592	Ft-FtPinG0001414800.01.T01	4e-176
0-427:	Fe-evm.model.Fe1.14593	Ft-FtPinG0001415000.01.T02	0
0-428:	Fe-evm.model.Fe1.14594	Ft-FtPinG0001415100.01.T01	3e-42
0-429:	Fe-evm.model.Fe1.14595	Ft-FtPinG0001415300.01.T01	0
0-430:	Fe-evm.model.Fe1.14596	Ft-FtPinG0001415600.01.T01	0
0-431:	Fe-evm.model.Fe1.14598	Ft-FtPinG0001415900.01.T01	0
0-432:	Fe-evm.model.Fe1.14599	Ft-FtPinG0001416200.01.T01	0
0-433:	Fe-evm.model.Fe1.14600	Ft-FtPinG0001416400.01.T01	4e-24
0-434:	Fe-evm.model.Fe1.14601	Ft-FtPinG0001416500.01.T01	9e-73
0-435:	Fe-evm.model.Fe1.14602	Ft-FtPinG0001420600.01.T01	1e-137
0-436:	Fe-evm.model.Fe1.14603	Ft-FtPinG0001420900.01.T01	3e-147
0-437:	Fe-evm.model.Fe1.14604	Ft-FtPinG0001421100.01.T01	4e-41
0-438:	Fe-evm.model.Fe1.14610	Ft-FtPinG0001421400.01.T01	2e-19
0-439:	Fe-evm.model.Fe1.14613	Ft-FtPinG0001421800.01.T01	0
0-440:	Fe-evm.model.Fe1.14614	Ft-FtPinG0001421900.01.T01	0
0-441:	Fe-evm.model.Fe1.14616	Ft-FtPinG0001422100.01.T01	0
0-442:	Fe-evm.model.Fe1.14617	Ft-FtPinG0001422300.01.T01	0
0-443:	Fe-evm.model.Fe1.14618	Ft-FtPinG0001422500.01.T01	1e-41
0-444:	Fe-evm.model.Fe1.14619	Ft-FtPinG0001423200.01.T01	0
0-445:	Fe-evm.model.Fe1.14621	Ft-FtPinG0001423300.01.T01	0
0-446:	Fe-evm.model.Fe1.14622	Ft-FtPinG0001423500.01.T01	0
0-447:	Fe-evm.model.Fe1.14623	Ft-FtPinG0001423800.01.T01	0
0-448:	Fe-evm.model.Fe1.14624	Ft-FtPinG0001423900.01.T01	1e-177
0-449:	Fe-evm.model.Fe1.14625	Ft-FtPinG0001424400.01.T01	5e-149
0-450:	Fe-evm.model.Fe1.14626	Ft-FtPinG0001424800.01.T02	1e-142
0-451:	Fe-evm.model.Fe1.14627	Ft-FtPinG0001425000.01.T01	0
0-452:	Fe-evm.model.Fe1.14628	Ft-FtPinG0001425400.01.T01	0
0-453:	Fe-evm.model.Fe1.14629	Ft-FtPinG0001425500.01.T01	7e-92
0-454:	Fe-evm.model.Fe1.14630	Ft-FtPinG0001425800.01.T01	2e-154
0-455:	Fe-evm.model.Fe1.14631	Ft-FtPinG0001426000.01.T01	0
0-456:	Fe-evm.model.Fe1.14634	Ft-FtPinG0001426300.01.T01	0
0-457:	Fe-evm.model.Fe1.14635	Ft-FtPinG0001426700.01.T01	6e-159
0-458:	Fe-evm.model.Fe1.14637	Ft-FtPinG0001427400.01.T01	1e-152
0-459:	Fe-evm.model.Fe1.14638	Ft-FtPinG0001427600.01.T01	0
0-460:	Fe-evm.model.Fe1.14640	Ft-FtPinG0001427700.01.T01	0
0-461:	Fe-evm.model.Fe1.14642	Ft-FtPinG0001428200.01.T01	2e-53
0-462:	Fe-evm.model.Fe1.14644	Ft-FtPinG0001428300.01.T01	3e-167
0-463:	Fe-evm.model.Fe1.14645	Ft-FtPinG0001428600.01.T01	0
0-464:	Fe-evm.model.Fe1.14646	Ft-FtPinG0001428800.01.T01	6e-166
## Alignment 1: score=971.0 e_value=1.4e-60 N=21 Fe-GWHBJBK00000001&Ft-Ft1 plus
1- 0:	Fe-evm.model.Fe1.14497	Ft-FtPinG0008434300.01.T01	0
1- 1:	Fe-evm.model.Fe1.14500	Ft-FtPinG0008434900.01.T01	0
1- 2:	Fe-evm.model.Fe1.14504	Ft-FtPinG0008436400.01.T01	4e-177
1- 3:	Fe-evm.model.Fe1.14505	Ft-FtPinG0008437100.01.T01	0
1- 4:	Fe-evm.model.Fe1.14508	Ft-FtPinG0008438700.01.T01	1e-113
1- 5:	Fe-evm.model.Fe1.14510	Ft-FtPinG0008439400.01.T01	0
1- 6:	Fe-evm.model.Fe1.14511	Ft-FtPinG0008440600.01.T01	5e-105
1- 7:	Fe-evm.model.Fe1.14514	Ft-FtPinG0008441800.01.T01	2e-124
1- 8:	Fe-evm.model.Fe1.14516	Ft-FtPinG0008442500.01.T01	0
1- 9:	Fe-evm.model.Fe1.14517	Ft-FtPinG0008443100.01.T01	9e-123
1- 10:	Fe-evm.model.Fe1.14518	Ft-FtPinG0008443500.01.T01	3e-53
1- 11:	Fe-evm.model.Fe1.14519	Ft-FtPinG0008444800.01.T01	4e-51
1- 12:	Fe-evm.model.Fe1.14520	Ft-FtPinG0008444900.01.T01	0
1- 13:	Fe-evm.model.Fe1.14525	Ft-FtPinG0002988200.01.T01	2e-171
1- 14:	Fe-evm.model.Fe1.14526	Ft-FtPinG0002988800.01.T01	0
1- 15:	Fe-evm.model.Fe1.14528	Ft-FtPinG0002991700.01.T01	5e-64
1- 16:	Fe-evm.model.Fe1.14531	Ft-FtPinG0002993600.01.T01	1e-71
1- 17:	Fe-evm.model.Fe1.14540	Ft-FtPinG0002998000.01.T01	4e-164
1- 18:	Fe-evm.model.Fe1.14541	Ft-FtPinG0002998200.01.T01	0
1- 19:	Fe-evm.model.Fe1.14545	Ft-FtPinG0006708600.01.T01	0
1- 20:	Fe-evm.model.Fe1.14550	Ft-FtPinG0006709100.01.T01	0
## Alignment 2: score=478.0 e_value=5e-25 N=11 Fe-GWHBJBK00000001&Ft-Ft1 plus
2- 0:	Fe-evm.model.Fe1.5189	Ft-FtPinG0007989700.01.T01	4e-130
2- 1:	Fe-evm.model.Fe1.5218	Ft-FtPinG0007990100.01.T01	0
2- 2:	Fe-evm.model.Fe1.5232	Ft-FtPinG0007990400.01.T01	0
2- 3:	Fe-evm.model.Fe1.5282	Ft-FtPinG0007991000.01.T01	1e-95
2- 4:	Fe-evm.model.Fe1.5307	Ft-FtPinG0007991300.01.T01	0
2- 5:	Fe-evm.model.Fe1.5328	Ft-FtPinG0007991800.01.T01	1e-46
2- 6:	Fe-evm.model.Fe1.5329	Ft-FtPinG0007992000.01.T01	3e-60
2- 7:	Fe-evm.model.Fe1.5360	Ft-FtPinG0007992100.01.T01	2e-64
2- 8:	Fe-evm.model.Fe1.5438	Ft-FtPinG0007994300.01.T01	0
2- 9:	Fe-evm.model.Fe1.5539	Ft-FtPinG0007996200.01.T02	1e-49
2- 10:	Fe-evm.model.Fe1.5552	Ft-FtPinG0007996700.01.T01	0
## Alignment 3: score=407.0 e_value=9.6e-19 N=9 Fe-GWHBJBK00000001&Ft-Ft1 plus
3- 0:	Fe-evm.model.Fe1.287	Ft-FtPinG0008023100.01.T01	3e-63
3- 1:	Fe-evm.model.Fe1.296	Ft-FtPinG0008020700.01.T02	0
3- 2:	Fe-evm.model.Fe1.301	Ft-FtPinG0008020300.01.T01	0
3- 3:	Fe-evm.model.Fe1.310	Ft-FtPinG0008020200.01.T01	0
3- 4:	Fe-evm.model.Fe1.313	Ft-FtPinG0008020000.01.T01	0
3- 5:	Fe-evm.model.Fe1.316	Ft-FtPinG0008019100.01.T01	7e-64
3- 6:	Fe-evm.model.Fe1.317	Ft-FtPinG0008018900.01.T01	6e-44
3- 7:	Fe-evm.model.Fe1.318	Ft-FtPinG0008018300.01.T01	0
3- 8:	Fe-evm.model.Fe1.346	Ft-FtPinG0008015700.01.T01	2e-157
## Alignment 4: score=407.0 e_value=9.6e-18 N=9 Fe-GWHBJBK00000001&Ft-Ft1 plus
4- 0:	Fe-evm.model.Fe1.177	Ft-FtPinG0006183700.01.T01	1e-134
4- 1:	Fe-evm.model.Fe1.180	Ft-FtPinG0006183300.01.T01	2e-45
4- 2:	Fe-evm.model.Fe1.181	Ft-FtPinG0006182700.01.T01	0
4- 3:	Fe-evm.model.Fe1.183	Ft-FtPinG0006182600.01.T01	0
4- 4:	Fe-evm.model.Fe1.194	Ft-FtPinG0006181400.01.T01	0
4- 5:	Fe-evm.model.Fe1.205	Ft-FtPinG0006179600.01.T01	7e-138
4- 6:	Fe-evm.model.Fe1.207	Ft-FtPinG0006179100.01.T01	4e-71
4- 7:	Fe-evm.model.Fe1.228	Ft-FtPinG0008549400.01.T01	8e-72
4- 8:	Fe-evm.model.Fe1.244	Ft-FtPinG0008023800.01.T01	7e-85
## Alignment 5: score=382.0 e_value=2.5e-19 N=9 Fe-GWHBJBK00000001&Ft-Ft1 plus
5- 0:	Fe-evm.model.Fe1.11361	Ft-FtPinG0000071200.01.T01	4e-18
5- 1:	Fe-evm.model.Fe1.11417	Ft-FtPinG0000066700.01.T01	4e-161
5- 2:	Fe-evm.model.Fe1.11454	Ft-FtPinG0000066200.01.T01	0
5- 3:	Fe-evm.model.Fe1.11496	Ft-FtPinG0000064500.01.T01	0
5- 4:	Fe-evm.model.Fe1.11499	Ft-FtPinG0000064100.01.T01	2e-152
5- 5:	Fe-evm.model.Fe1.11512	Ft-FtPinG0000062600.01.T01	2e-161
5- 6:	Fe-evm.model.Fe1.11600	Ft-FtPinG0000062000.01.T01	0
5- 7:	Fe-evm.model.Fe1.11601	Ft-FtPinG0000061700.01.T01	0
5- 8:	Fe-evm.model.Fe1.11640	Ft-FtPinG0004377600.01.T01	0
## Alignment 6: score=345.0 e_value=1.1e-14 N=8 Fe-GWHBJBK00000001&Ft-Ft1 plus
6- 0:	Fe-evm.model.Fe1.10100	Ft-FtPinG0000378900.01.T01	0
6- 1:	Fe-evm.model.Fe1.10110	Ft-FtPinG0000379300.01.T01	6e-60
6- 2:	Fe-evm.model.Fe1.10137	Ft-FtPinG0000379800.01.T01	4e-98
6- 3:	Fe-evm.model.Fe1.10152	Ft-FtPinG0000380100.01.T01	0
6- 4:	Fe-evm.model.Fe1.10155	Ft-FtPinG0000380700.01.T01	5e-138
6- 5:	Fe-evm.model.Fe1.10168	Ft-FtPinG0000381800.01.T01	3e-45
6- 6:	Fe-evm.model.Fe1.10295	Ft-FtPinG0000383700.01.T01	6e-69
6- 7:	Fe-evm.model.Fe1.10367	Ft-FtPinG0000386300.01.T01	3e-52
## Alignment 7: score=338.0 e_value=3.5e-16 N=8 Fe-GWHBJBK00000001&Ft-Ft1 plus
7- 0:	Fe-evm.model.Fe1.1933	Ft-FtPinG0000199500.01.T01	1e-52
7- 1:	Fe-evm.model.Fe1.1965	Ft-FtPinG0000200000.01.T01	0
7- 2:	Fe-evm.model.Fe1.1966	Ft-FtPinG0000200500.01.T01	2e-70
7- 3:	Fe-evm.model.Fe1.2025	Ft-FtPinG0000202400.01.T01	3e-21
7- 4:	Fe-evm.model.Fe1.2057	Ft-FtPinG0000207100.01.T01	6e-153
7- 5:	Fe-evm.model.Fe1.2059	Ft-FtPinG0000207400.01.T01	0
7- 6:	Fe-evm.model.Fe1.2073	Ft-FtPinG0000208900.01.T01	0
7- 7:	Fe-evm.model.Fe1.2088	Ft-FtPinG0000209500.01.T01	3e-145
## Alignment 8: score=260.0 e_value=3.9e-08 N=6 Fe-GWHBJBK00000001&Ft-Ft1 plus
8- 0:	Fe-evm.model.Fe1.11070	Ft-FtPinG0000080400.01.T01	5e-32
8- 1:	Fe-evm.model.Fe1.11133	Ft-FtPinG0000079400.01.T01	0
8- 2:	Fe-evm.model.Fe1.11181	Ft-FtPinG0000077200.01.T01	1e-93
8- 3:	Fe-evm.model.Fe1.11197	Ft-FtPinG0000074600.01.T01	2e-71
8- 4:	Fe-evm.model.Fe1.11219	Ft-FtPinG0000073900.01.T01	0
8- 5:	Fe-evm.model.Fe1.11231	Ft-FtPinG0000072700.01.T01	3e-64
## Alignment 9: score=250.0 e_value=1.7e-10 N=7 Fe-GWHBJBK00000001&Ft-Ft1 plus
9- 0:	Fe-evm.model.Fe1.13831	Ft-FtPinG0005485300.01.T01	6e-28
9- 1:	Fe-evm.model.Fe1.13861	Ft-FtPinG0005479900.01.T01	1e-141
9- 2:	Fe-evm.model.Fe1.13899	Ft-FtPinG0005473800.01.T01	2e-96
9- 3:	Fe-evm.model.Fe1.13914	Ft-FtPinG0003414300.01.T02	0
9- 4:	Fe-evm.model.Fe1.13929	Ft-FtPinG0003416900.01.T01	1e-93
9- 5:	Fe-evm.model.Fe1.13935	Ft-FtPinG0006046800.01.T01	6e-142
9- 6:	Fe-evm.model.Fe1.13943	Ft-FtPinG0006049400.01.T01	2e-116
## Alignment 10: score=909.0 e_value=4.8e-66 N=22 Fe-GWHBJBK00000001&Ft-Ft1 minus
10- 0:	Fe-evm.model.Fe1.2341	Ft-FtPinG0000175700.01.T01	0
10- 1:	Fe-evm.model.Fe1.2354	Ft-FtPinG0000175000.01.T01	7e-83
10- 2:	Fe-evm.model.Fe1.2359	Ft-FtPinG0000174800.01.T01	0
10- 3:	Fe-evm.model.Fe1.2365	Ft-FtPinG0000174500.01.T01	8e-66
10- 4:	Fe-evm.model.Fe1.2401	Ft-FtPinG0000171600.01.T01	6e-178
10- 5:	Fe-evm.model.Fe1.2474	Ft-FtPinG0000169500.01.T01	0
10- 6:	Fe-evm.model.Fe1.2508	Ft-FtPinG0000164400.01.T01	0
10- 7:	Fe-evm.model.Fe1.2515	Ft-FtPinG0000162600.01.T01	5e-153
10- 8:	Fe-evm.model.Fe1.2551	Ft-FtPinG0000159700.01.T01	9e-50
10- 9:	Fe-evm.model.Fe1.2555	Ft-FtPinG0000159100.01.T01	3e-29
10- 10:	Fe-evm.model.Fe1.2639	Ft-FtPinG0000156900.01.T01	2e-137
10- 11:	Fe-evm.model.Fe1.2640	Ft-FtPinG0000154600.01.T01	0
10- 12:	Fe-evm.model.Fe1.2695	Ft-FtPinG0000150500.01.T01	0
10- 13:	Fe-evm.model.Fe1.2706	Ft-FtPinG0000150400.01.T01	0
10- 14:	Fe-evm.model.Fe1.2734	Ft-FtPinG0000149300.01.T01	3e-78
10- 15:	Fe-evm.model.Fe1.2752	Ft-FtPinG0000147400.01.T01	0
10- 16:	Fe-evm.model.Fe1.2762	Ft-FtPinG0000145000.01.T01	4e-12
10- 17:	Fe-evm.model.Fe1.2784	Ft-FtPinG0000142900.01.T01	1e-68
10- 18:	Fe-evm.model.Fe1.2860	Ft-FtPinG0000133900.01.T01	0
10- 19:	Fe-evm.model.Fe1.2906	Ft-FtPinG0000131000.01.T01	1e-109
10- 20:	Fe-evm.model.Fe1.2926	Ft-FtPinG0000130800.01.T01	4e-65
10- 21:	Fe-evm.model.Fe1.2963	Ft-FtPinG0000129300.01.T01	9e-42
## Alignment 11: score=811.0 e_value=2.8e-55 N=20 Fe-GWHBJBK00000001&Ft-Ft1 minus
11- 0:	Fe-evm.model.Fe1.1540	Ft-FtPinG0000249800.01.T01	1e-96
11- 1:	Fe-evm.model.Fe1.1544	Ft-FtPinG0000249300.01.T01	4e-76
11- 2:	Fe-evm.model.Fe1.1573	Ft-FtPinG0000248900.01.T01	7e-155
11- 3:	Fe-evm.model.Fe1.1599	Ft-FtPinG0000246400.01.T01	0
11- 4:	Fe-evm.model.Fe1.1625	Ft-FtPinG0000244100.01.T01	4e-152
11- 5:	Fe-evm.model.Fe1.1644	Ft-FtPinG0000241100.01.T01	0
11- 6:	Fe-evm.model.Fe1.1645	Ft-FtPinG0000239200.01.T01	3e-113
11- 7:	Fe-evm.model.Fe1.1679	Ft-FtPinG0000232900.01.T01	2e-25
11- 8:	Fe-evm.model.Fe1.1709	Ft-FtPinG0000230600.01.T01	0
11- 9:	Fe-evm.model.Fe1.1722	Ft-FtPinG0000230400.01.T01	0
11- 10:	Fe-evm.model.Fe1.1753	Ft-FtPinG0000228200.01.T01	6e-166
11- 11:	Fe-evm.model.Fe1.1793	Ft-FtPinG0000220600.01.T01	7e-125
11- 12:	Fe-evm.model.Fe1.1862	Ft-FtPinG0000217100.01.T01	0
11- 13:	Fe-evm.model.Fe1.1880	Ft-FtPinG0000215500.01.T01	8e-94
11- 14:	Fe-evm.model.Fe1.1881	Ft-FtPinG0000214700.01.T01	1e-26
11- 15:	Fe-evm.model.Fe1.1884	Ft-FtPinG0000213800.01.T01	0
11- 16:	Fe-evm.model.Fe1.1898	Ft-FtPinG0000213100.01.T01	1e-137
11- 17:	Fe-evm.model.Fe1.1903	Ft-FtPinG0000212400.01.T01	1e-58
11- 18:	Fe-evm.model.Fe1.1907	Ft-FtPinG0000211700.01.T01	1e-158
11- 19:	Fe-evm.model.Fe1.1927	Ft-FtPinG0000210200.01.T01	0
## Alignment 12: score=465.0 e_value=1.2e-25 N=11 Fe-GWHBJBK00000001&Ft-Ft1 minus
12- 0:	Fe-evm.model.Fe1.408	Ft-FtPinG0002437500.01.T01	1e-32
12- 1:	Fe-evm.model.Fe1.412	Ft-FtPinG0002437700.01.T01	8e-59
12- 2:	Fe-evm.model.Fe1.413	Ft-FtPinG0002438000.01.T01	6e-58
12- 3:	Fe-evm.model.Fe1.416	Ft-FtPinG0002438800.01.T01	2e-56
12- 4:	Fe-evm.model.Fe1.423	Ft-FtPinG0002438900.01.T01	6e-50
12- 5:	Fe-evm.model.Fe1.459	Ft-FtPinG0002440600.01.T01	4e-43
12- 6:	Fe-evm.model.Fe1.487	Ft-FtPinG0002443300.01.T01	3e-85
12- 7:	Fe-evm.model.Fe1.491	Ft-FtPinG0002443500.01.T01	3e-119
12- 8:	Fe-evm.model.Fe1.505	Ft-FtPinG0002444200.01.T01	0
12- 9:	Fe-evm.model.Fe1.555	Ft-FtPinG0002447300.01.T01	2e-173
12- 10:	Fe-evm.model.Fe1.560	Ft-FtPinG0002447500.01.T01	1e-61
## Alignment 13: score=275.0 e_value=1.5e-08 N=6 Fe-GWHBJBK00000001&Ft-Ft1 minus
13- 0:	Fe-evm.model.Fe1.2124	Ft-FtPinG0000186700.01.T01	8e-159
13- 1:	Fe-evm.model.Fe1.2138	Ft-FtPinG0000186600.01.T01	6e-26
13- 2:	Fe-evm.model.Fe1.2155	Ft-FtPinG0000184900.01.T01	0
13- 3:	Fe-evm.model.Fe1.2176	Ft-FtPinG0000183800.01.T01	6e-125
13- 4:	Fe-evm.model.Fe1.2182	Ft-FtPinG0000181000.01.T01	0
13- 5:	Fe-evm.model.Fe1.2227	Ft-FtPinG0000180700.01.T02	4e-76
## Alignment 14: score=1263.0 e_value=2.2e-97 N=29 Fe-GWHBJBK00000001&Ft-Ft3 plus
14- 0:	Fe-evm.model.Fe1.13981	Ft-FtPinG0009105700.01.T01	0
14- 1:	Fe-evm.model.Fe1.14009	Ft-FtPinG0009102300.01.T01	1e-168
14- 2:	Fe-evm.model.Fe1.14015	Ft-FtPinG0004814300.01.T01	5e-75
14- 3:	Fe-evm.model.Fe1.14017	Ft-FtPinG0004812800.01.T01	0
14- 4:	Fe-evm.model.Fe1.14024	Ft-FtPinG0004809400.01.T01	4e-66
14- 5:	Fe-evm.model.Fe1.14025	Ft-FtPinG0004809100.01.T01	0
14- 6:	Fe-evm.model.Fe1.14027	Ft-FtPinG0004808700.01.T01	5e-152
14- 7:	Fe-evm.model.Fe1.14053	Ft-FtPinG0001051000.01.T01	4e-157
14- 8:	Fe-evm.model.Fe1.14054	Ft-FtPinG0001051500.01.T01	0
14- 9:	Fe-evm.model.Fe1.14055	Ft-FtPinG0001051900.01.T01	2e-109
14- 10:	Fe-evm.model.Fe1.14056	Ft-FtPinG0001052600.01.T02	0
14- 11:	Fe-evm.model.Fe1.14057	Ft-FtPinG0001053000.01.T01	5e-95
14- 12:	Fe-evm.model.Fe1.14060	Ft-FtPinG0001053400.01.T01	2e-114
14- 13:	Fe-evm.model.Fe1.14062	Ft-FtPinG0006038100.01.T01	0
14- 14:	Fe-evm.model.Fe1.14069	Ft-FtPinG0006038700.01.T01	8e-120
14- 15:	Fe-evm.model.Fe1.14082	Ft-FtPinG0006040600.01.T01	0
14- 16:	Fe-evm.model.Fe1.14091	Ft-FtPinG0006040700.01.T01	9e-99
14- 17:	Fe-evm.model.Fe1.14120	Ft-FtPinG0006084400.01.T01	0
14- 18:	Fe-evm.model.Fe1.14148	Ft-FtPinG0006081200.01.T02	0
14- 19:	Fe-evm.model.Fe1.14159	Ft-FtPinG0006382900.01.T01	4e-112
14- 20:	Fe-evm.model.Fe1.14162	Ft-FtPinG0001079400.01.T01	3e-127
14- 21:	Fe-evm.model.Fe1.14163	Ft-FtPinG0001078300.01.T01	2e-76
14- 22:	Fe-evm.model.Fe1.14169	Ft-FtPinG0000424300.01.T01	5e-55
14- 23:	Fe-evm.model.Fe1.14174	Ft-FtPinG0000424700.01.T01	0
14- 24:	Fe-evm.model.Fe1.14178	Ft-FtPinG0000425100.01.T01	0
14- 25:	Fe-evm.model.Fe1.14202	Ft-FtPinG0000426800.01.T01	2e-45
14- 26:	Fe-evm.model.Fe1.14228	Ft-FtPinG0000429600.01.T01	3e-117
14- 27:	Fe-evm.model.Fe1.14235	Ft-FtPinG0000429900.01.T01	0
14- 28:	Fe-evm.model.Fe1.14236	Ft-FtPinG0000430100.01.T01	2e-42
## Alignment 15: score=802.0 e_value=5.2e-55 N=19 Fe-GWHBJBK00000001&Ft-Ft3 plus
15- 0:	Fe-evm.model.Fe1.11361	Ft-FtPinG0006259400.01.T01	2e-94
15- 1:	Fe-evm.model.Fe1.11393	Ft-FtPinG0006259900.01.T01	6e-150
15- 2:	Fe-evm.model.Fe1.11394	Ft-FtPinG0006260600.01.T01	5e-71
15- 3:	Fe-evm.model.Fe1.11405	Ft-FtPinG0006261000.01.T01	8e-125
15- 4:	Fe-evm.model.Fe1.11469	Ft-FtPinG0006317600.01.T01	2e-175
15- 5:	Fe-evm.model.Fe1.11470	Ft-FtPinG0006317300.01.T01	2e-74
15- 6:	Fe-evm.model.Fe1.11512	Ft-FtPinG0006766300.01.T01	2e-161
15- 7:	Fe-evm.model.Fe1.11600	Ft-FtPinG0000901000.01.T01	0
15- 8:	Fe-evm.model.Fe1.11651	Ft-FtPinG0000899300.01.T01	0
15- 9:	Fe-evm.model.Fe1.11682	Ft-FtPinG0000898800.01.T01	7e-59
15- 10:	Fe-evm.model.Fe1.11758	Ft-FtPinG0000898000.01.T01	0
15- 11:	Fe-evm.model.Fe1.11767	Ft-FtPinG0000897500.01.T01	3e-39
15- 12:	Fe-evm.model.Fe1.11791	Ft-FtPinG0000896500.01.T01	0
15- 13:	Fe-evm.model.Fe1.11794	Ft-FtPinG0000896300.01.T01	3e-73
15- 14:	Fe-evm.model.Fe1.11848	Ft-FtPinG0000894900.01.T01	6e-86
15- 15:	Fe-evm.model.Fe1.11872	Ft-FtPinG0000894700.01.T01	0
15- 16:	Fe-evm.model.Fe1.11930	Ft-FtPinG0000894300.01.T01	0
15- 17:	Fe-evm.model.Fe1.11969	Ft-FtPinG0008628900.01.T01	0
15- 18:	Fe-evm.model.Fe1.11979	Ft-FtPinG0008629700.01.T01	3e-175
## Alignment 16: score=740.0 e_value=1.9e-50 N=17 Fe-GWHBJBK00000001&Ft-Ft3 plus
16- 0:	Fe-evm.model.Fe1.10344	Ft-FtPinG0004858000.01.T01	1e-121
16- 1:	Fe-evm.model.Fe1.10358	Ft-FtPinG0008950900.01.T02	0
16- 2:	Fe-evm.model.Fe1.10411	Ft-FtPinG0008594800.01.T01	0
16- 3:	Fe-evm.model.Fe1.10412	Ft-FtPinG0008594600.01.T01	3e-136
16- 4:	Fe-evm.model.Fe1.10470	Ft-FtPinG0008594200.01.T01	2e-103
16- 5:	Fe-evm.model.Fe1.10482	Ft-FtPinG0008126100.01.T01	2e-38
16- 6:	Fe-evm.model.Fe1.10492	Ft-FtPinG0004075800.01.T01	9e-78
16- 7:	Fe-evm.model.Fe1.10503	Ft-FtPinG0004076000.01.T01	2e-165
16- 8:	Fe-evm.model.Fe1.10513	Ft-FtPinG0004077400.01.T01	6e-46
16- 9:	Fe-evm.model.Fe1.10594	Ft-FtPinG0004082400.01.T01	0
16- 10:	Fe-evm.model.Fe1.10632	Ft-FtPinG0004083100.01.T01	0
16- 11:	Fe-evm.model.Fe1.10635	Ft-FtPinG0004084000.01.T01	1e-143
16- 12:	Fe-evm.model.Fe1.10645	Ft-FtPinG0004084100.01.T01	6e-48
16- 13:	Fe-evm.model.Fe1.10692	Ft-FtPinG0001689700.01.T01	0
16- 14:	Fe-evm.model.Fe1.10721	Ft-FtPinG0001687300.01.T01	6e-82
16- 15:	Fe-evm.model.Fe1.10722	Ft-FtPinG0001687100.01.T01	0
16- 16:	Fe-evm.model.Fe1.10725	Ft-FtPinG0008532000.01.T01	1e-36
## Alignment 17: score=682.0 e_value=1.6e-37 N=15 Fe-GWHBJBK00000001&Ft-Ft3 plus
17- 0:	Fe-evm.model.Fe1.14499	Ft-FtPinG0005326800.01.T01	0
17- 1:	Fe-evm.model.Fe1.14506	Ft-FtPinG0005326500.01.T01	3e-149
17- 2:	Fe-evm.model.Fe1.14510	Ft-FtPinG0000761800.01.T01	5e-104
17- 3:	Fe-evm.model.Fe1.14518	Ft-FtPinG0000764300.01.T01	5e-47
17- 4:	Fe-evm.model.Fe1.14519	Ft-FtPinG0000765000.01.T01	5e-50
17- 5:	Fe-evm.model.Fe1.14521	Ft-FtPinG0000766300.01.T01	1e-113
17- 6:	Fe-evm.model.Fe1.14524	Ft-FtPinG0000767400.01.T01	4e-27
17- 7:	Fe-evm.model.Fe1.14528	Ft-FtPinG0000768500.01.T01	3e-56
17- 8:	Fe-evm.model.Fe1.14529	Ft-FtPinG0000770100.01.T01	7e-97
17- 9:	Fe-evm.model.Fe1.14539	Ft-FtPinG0000772000.01.T01	2e-23
17- 10:	Fe-evm.model.Fe1.14540	Ft-FtPinG0000772400.01.T01	2e-161
17- 11:	Fe-evm.model.Fe1.14542	Ft-FtPinG0000772500.01.T01	7e-67
17- 12:	Fe-evm.model.Fe1.14547	Ft-FtPinG0000775500.01.T01	0
17- 13:	Fe-evm.model.Fe1.14551	Ft-FtPinG0000777000.01.T01	1e-13
17- 14:	Fe-evm.model.Fe1.14555	Ft-FtPinG0000779100.01.T01	0
## Alignment 18: score=640.0 e_value=7.6e-38 N=15 Fe-GWHBJBK00000001&Ft-Ft3 plus
18- 0:	Fe-evm.model.Fe1.9294	Ft-FtPinG0001076300.01.T01	7e-15
18- 1:	Fe-evm.model.Fe1.9334	Ft-FtPinG0001069700.01.T01	1e-59
18- 2:	Fe-evm.model.Fe1.9338	Ft-FtPinG0001068700.01.T01	0
18- 3:	Fe-evm.model.Fe1.9368	Ft-FtPinG0001068100.01.T01	0
18- 4:	Fe-evm.model.Fe1.9400	Ft-FtPinG0001066100.01.T01	0
18- 5:	Fe-evm.model.Fe1.9426	Ft-FtPinG0001064800.01.T01	0
18- 6:	Fe-evm.model.Fe1.9532	Ft-FtPinG0001064100.01.T01	0
18- 7:	Fe-evm.model.Fe1.9609	Ft-FtPinG0001063000.01.T01	0
18- 8:	Fe-evm.model.Fe1.9639	Ft-FtPinG0001062500.01.T01	5e-144
18- 9:	Fe-evm.model.Fe1.9723	Ft-FtPinG0001062200.01.T01	3e-132
18- 10:	Fe-evm.model.Fe1.9769	Ft-FtPinG0005148000.01.T01	0
18- 11:	Fe-evm.model.Fe1.9808	Ft-FtPinG0005147100.01.T01	0
18- 12:	Fe-evm.model.Fe1.9820	Ft-FtPinG0005145200.01.T01	0
18- 13:	Fe-evm.model.Fe1.9829	Ft-FtPinG0005145000.01.T01	2e-70
18- 14:	Fe-evm.model.Fe1.9845	Ft-FtPinG0005144700.01.T01	1e-80
## Alignment 19: score=630.0 e_value=5e-35 N=14 Fe-GWHBJBK00000001&Ft-Ft3 plus
19- 0:	Fe-evm.model.Fe1.10901	Ft-FtPinG0008529800.01.T01	0
19- 1:	Fe-evm.model.Fe1.10961	Ft-FtPinG0006602600.01.T01	1e-106
19- 2:	Fe-evm.model.Fe1.10966	Ft-FtPinG0006602000.01.T01	5e-177
19- 3:	Fe-evm.model.Fe1.11017	Ft-FtPinG0006601700.01.T01	2e-99
19- 4:	Fe-evm.model.Fe1.11125	Ft-FtPinG0008033800.01.T01	9e-92
19- 5:	Fe-evm.model.Fe1.11163	Ft-FtPinG0006255300.01.T01	4e-169
19- 6:	Fe-evm.model.Fe1.11197	Ft-FtPinG0006255700.01.T01	7e-62
19- 7:	Fe-evm.model.Fe1.11202	Ft-FtPinG0006255900.01.T01	2e-67
19- 8:	Fe-evm.model.Fe1.11215	Ft-FtPinG0006256300.01.T01	1e-48
19- 9:	Fe-evm.model.Fe1.11219	Ft-FtPinG0006256800.01.T01	0
19- 10:	Fe-evm.model.Fe1.11226	Ft-FtPinG0006257200.01.T01	0
19- 11:	Fe-evm.model.Fe1.11231	Ft-FtPinG0006258000.01.T01	1e-42
19- 12:	Fe-evm.model.Fe1.11237	Ft-FtPinG0006258800.01.T01	0
19- 13:	Fe-evm.model.Fe1.11252	Ft-FtPinG0006259400.01.T01	2e-92
## Alignment 20: score=583.0 e_value=5.8e-36 N=14 Fe-GWHBJBK00000001&Ft-Ft3 plus
20- 0:	Fe-evm.model.Fe1.13820	Ft-FtPinG0001788700.01.T01	6e-66
20- 1:	Fe-evm.model.Fe1.13849	Ft-FtPinG0001781200.01.T01	0
20- 2:	Fe-evm.model.Fe1.13854	Ft-FtPinG0009117900.01.T01	0
20- 3:	Fe-evm.model.Fe1.13882	Ft-FtPinG0009114000.01.T01	4e-100
20- 4:	Fe-evm.model.Fe1.13888	Ft-FtPinG0009113800.01.T01	6e-62
20- 5:	Fe-evm.model.Fe1.13906	Ft-FtPinG0009112200.01.T01	0
20- 6:	Fe-evm.model.Fe1.13915	Ft-FtPinG0009111300.01.T01	4e-169
20- 7:	Fe-evm.model.Fe1.13919	Ft-FtPinG0009111200.01.T01	0
20- 8:	Fe-evm.model.Fe1.13924	Ft-FtPinG0009110600.01.T01	0
20- 9:	Fe-evm.model.Fe1.13926	Ft-FtPinG0009110300.01.T01	6e-132
20- 10:	Fe-evm.model.Fe1.13929	Ft-FtPinG0009109800.01.T01	1e-99
20- 11:	Fe-evm.model.Fe1.13940	Ft-FtPinG0009109100.01.T01	0
20- 12:	Fe-evm.model.Fe1.13941	Ft-FtPinG0009107100.01.T01	0
20- 13:	Fe-evm.model.Fe1.13968	Ft-FtPinG0009104500.01.T01	6e-86
## Alignment 21: score=491.0 e_value=1.6e-20 N=10 Fe-GWHBJBK00000001&Ft-Ft3 plus
21- 0:	Fe-evm.model.Fe1.7388	Ft-FtPinG0006603100.01.T01	0
21- 1:	Fe-evm.model.Fe1.7394	Ft-FtPinG0006603600.01.T01	0
21- 2:	Fe-evm.model.Fe1.7398	Ft-FtPinG0006603700.01.T01	0
21- 3:	Fe-evm.model.Fe1.7400	Ft-FtPinG0006604400.01.T01	0
21- 4:	Fe-evm.model.Fe1.7405	Ft-FtPinG0006604500.01.T01	0
21- 5:	Fe-evm.model.Fe1.7410	Ft-FtPinG0006604900.01.T01	0
21- 6:	Fe-evm.model.Fe1.7411	Ft-FtPinG0009775900.01.T01	0
21- 7:	Fe-evm.model.Fe1.7412	Ft-FtPinG0009776500.01.T01	6e-121
21- 8:	Fe-evm.model.Fe1.7414	Ft-FtPinG0009776700.01.T01	5e-174
21- 9:	Fe-evm.model.Fe1.7430	Ft-FtPinG0002654600.01.T01	0
## Alignment 22: score=474.0 e_value=6.8e-27 N=11 Fe-GWHBJBK00000001&Ft-Ft3 plus
22- 0:	Fe-evm.model.Fe1.14397	Ft-FtPinG0007336300.01.T01	5e-150
22- 1:	Fe-evm.model.Fe1.14402	Ft-FtPinG0007337300.01.T01	2e-43
22- 2:	Fe-evm.model.Fe1.14424	Ft-FtPinG0007338900.01.T01	0
22- 3:	Fe-evm.model.Fe1.14425	Ft-FtPinG0007339200.01.T01	0
22- 4:	Fe-evm.model.Fe1.14428	Ft-FtPinG0007339400.01.T01	1e-118
22- 5:	Fe-evm.model.Fe1.14431	Ft-FtPinG0007340100.01.T01	0
22- 6:	Fe-evm.model.Fe1.14458	Ft-FtPinG0007606900.01.T01	1e-48
22- 7:	Fe-evm.model.Fe1.14466	Ft-FtPinG0007634700.01.T01	0
22- 8:	Fe-evm.model.Fe1.14468	Ft-FtPinG0007636000.01.T01	5e-86
22- 9:	Fe-evm.model.Fe1.14476	Ft-FtPinG0007637100.01.T01	4e-57
22- 10:	Fe-evm.model.Fe1.14478	Ft-FtPinG0001961600.01.T01	6e-78
## Alignment 23: score=295.0 e_value=3.2e-11 N=7 Fe-GWHBJBK00000001&Ft-Ft3 plus
23- 0:	Fe-evm.model.Fe1.12761	Ft-FtPinG0009585400.01.T01	0
23- 1:	Fe-evm.model.Fe1.12777	Ft-FtPinG0009586900.01.T01	5e-168
23- 2:	Fe-evm.model.Fe1.12812	Ft-FtPinG0009587100.01.T01	0
23- 3:	Fe-evm.model.Fe1.12824	Ft-FtPinG0009590700.01.T02	0
23- 4:	Fe-evm.model.Fe1.12827	Ft-FtPinG0005888400.01.T01	0
23- 5:	Fe-evm.model.Fe1.12850	Ft-FtPinG0005156600.01.T01	1e-42
23- 6:	Fe-evm.model.Fe1.12856	Ft-FtPinG0005156900.01.T01	4e-92
## Alignment 24: score=284.0 e_value=2.3e-08 N=6 Fe-GWHBJBK00000001&Ft-Ft3 plus
24- 0:	Fe-evm.model.Fe1.10215	Ft-FtPinG0001744900.01.T01	2e-112
24- 1:	Fe-evm.model.Fe1.10226	Ft-FtPinG0001745100.01.T01	0
24- 2:	Fe-evm.model.Fe1.10247	Ft-FtPinG0001745700.01.T01	1e-63
24- 3:	Fe-evm.model.Fe1.10270	Ft-FtPinG0001746200.01.T01	7e-110
24- 4:	Fe-evm.model.Fe1.10295	Ft-FtPinG0001746600.01.T01	5e-74
24- 5:	Fe-evm.model.Fe1.10315	Ft-FtPinG0001747200.01.T01	0
## Alignment 25: score=283.0 e_value=7.2e-11 N=7 Fe-GWHBJBK00000001&Ft-Ft3 plus
25- 0:	Fe-evm.model.Fe1.12283	Ft-FtPinG0000356000.01.T01	0
25- 1:	Fe-evm.model.Fe1.12288	Ft-FtPinG0000357300.01.T01	0
25- 2:	Fe-evm.model.Fe1.12321	Ft-FtPinG0000358300.01.T01	2e-112
25- 3:	Fe-evm.model.Fe1.12367	Ft-FtPinG0000358800.01.T01	1e-124
25- 4:	Fe-evm.model.Fe1.12426	Ft-FtPinG0000359400.01.T01	0
25- 5:	Fe-evm.model.Fe1.12438	Ft-FtPinG0000361100.01.T01	0
25- 6:	Fe-evm.model.Fe1.12467	Ft-FtPinG0000362000.01.T01	1e-35
## Alignment 26: score=263.0 e_value=2e-11 N=7 Fe-GWHBJBK00000001&Ft-Ft3 plus
26- 0:	Fe-evm.model.Fe1.1174	Ft-FtPinG0004839800.01.T01	1e-172
26- 1:	Fe-evm.model.Fe1.1211	Ft-FtPinG0004490000.01.T01	9e-139
26- 2:	Fe-evm.model.Fe1.1223	Ft-FtPinG0007661100.01.T01	3e-11
26- 3:	Fe-evm.model.Fe1.1244	Ft-FtPinG0000961200.01.T01	0
26- 4:	Fe-evm.model.Fe1.1247	Ft-FtPinG0000960900.01.T01	7e-65
26- 5:	Fe-evm.model.Fe1.1285	Ft-FtPinG0008231400.01.T01	8e-42
26- 6:	Fe-evm.model.Fe1.1324	Ft-FtPinG0002915900.01.T02	7e-130
## Alignment 27: score=955.0 e_value=1.4e-61 N=21 Fe-GWHBJBK00000001&Ft-Ft3 minus
27- 0:	Fe-evm.model.Fe1.11992	Ft-FtPinG0000355400.01.T01	0
27- 1:	Fe-evm.model.Fe1.12041	Ft-FtPinG0006786300.01.T01	4e-31
27- 2:	Fe-evm.model.Fe1.12103	Ft-FtPinG0006783500.01.T01	0
27- 3:	Fe-evm.model.Fe1.12117	Ft-FtPinG0006783100.01.T01	0
27- 4:	Fe-evm.model.Fe1.12148	Ft-FtPinG0007134800.01.T01	0
27- 5:	Fe-evm.model.Fe1.12150	Ft-FtPinG0008676000.01.T01	7e-106
27- 6:	Fe-evm.model.Fe1.12158	Ft-FtPinG0008674600.01.T01	6e-55
27- 7:	Fe-evm.model.Fe1.12165	Ft-FtPinG0008672500.01.T01	4e-110
27- 8:	Fe-evm.model.Fe1.12189	Ft-FtPinG0008672400.01.T01	0
27- 9:	Fe-evm.model.Fe1.12190	Ft-FtPinG0008671800.01.T01	5e-111
27- 10:	Fe-evm.model.Fe1.12194	Ft-FtPinG0008670900.01.T01	0
27- 11:	Fe-evm.model.Fe1.12206	Ft-FtPinG0005226000.01.T01	0
27- 12:	Fe-evm.model.Fe1.12210	Ft-FtPinG0005224700.01.T01	0
27- 13:	Fe-evm.model.Fe1.12221	Ft-FtPinG0008635100.01.T01	1e-68
27- 14:	Fe-evm.model.Fe1.12234	Ft-FtPinG0008634800.01.T01	3e-113
27- 15:	Fe-evm.model.Fe1.12238	Ft-FtPinG0008633100.01.T01	3e-60
27- 16:	Fe-evm.model.Fe1.12242	Ft-FtPinG0008632100.01.T01	1e-99
27- 17:	Fe-evm.model.Fe1.12245	Ft-FtPinG0008631700.01.T01	2e-178
27- 18:	Fe-evm.model.Fe1.12250	Ft-FtPinG0008630900.01.T01	7e-166
27- 19:	Fe-evm.model.Fe1.12261	Ft-FtPinG0008630800.01.T01	2e-148
27- 20:	Fe-evm.model.Fe1.12270	Ft-FtPinG0008630300.01.T01	3e-28
## Alignment 28: score=773.0 e_value=1.5e-46 N=17 Fe-GWHBJBK00000001&Ft-Ft3 minus
28- 0:	Fe-evm.model.Fe1.11160	Ft-FtPinG0001189900.01.T01	5e-104
28- 1:	Fe-evm.model.Fe1.11163	Ft-FtPinG0001190100.01.T01	0
28- 2:	Fe-evm.model.Fe1.11169	Ft-FtPinG0004449900.01.T01	0
28- 3:	Fe-evm.model.Fe1.11197	Ft-FtPinG0004449200.01.T01	3e-69
28- 4:	Fe-evm.model.Fe1.11200	Ft-FtPinG0004449000.01.T01	4e-12
28- 5:	Fe-evm.model.Fe1.11216	Ft-FtPinG0004448700.01.T02	8e-138
28- 6:	Fe-evm.model.Fe1.11219	Ft-FtPinG0004448500.01.T01	0
28- 7:	Fe-evm.model.Fe1.11231	Ft-FtPinG0004448100.01.T01	4e-70
28- 8:	Fe-evm.model.Fe1.11249	Ft-FtPinG0004446700.01.T01	1e-50
28- 9:	Fe-evm.model.Fe1.11252	Ft-FtPinG0004446500.01.T01	8e-164
28- 10:	Fe-evm.model.Fe1.11361	Ft-FtPinG0004446100.01.T01	5e-156
28- 11:	Fe-evm.model.Fe1.11400	Ft-FtPinG0004443400.01.T01	1e-12
28- 12:	Fe-evm.model.Fe1.11415	Ft-FtPinG0004441500.01.T01	5e-67
28- 13:	Fe-evm.model.Fe1.11417	Ft-FtPinG0004440900.01.T02	2e-163
28- 14:	Fe-evm.model.Fe1.11435	Ft-FtPinG0004440800.01.T01	0
28- 15:	Fe-evm.model.Fe1.11439	Ft-FtPinG0004439500.01.T01	0
28- 16:	Fe-evm.model.Fe1.11454	Ft-FtPinG0004438200.01.T02	0
## Alignment 29: score=752.0 e_value=7.3e-43 N=16 Fe-GWHBJBK00000001&Ft-Ft3 minus
29- 0:	Fe-evm.model.Fe1.2078	Ft-FtPinG0006086600.01.T01	0
29- 1:	Fe-evm.model.Fe1.2082	Ft-FtPinG0006087500.01.T01	6e-106
29- 2:	Fe-evm.model.Fe1.2083	Ft-FtPinG0006088000.01.T01	1e-115
29- 3:	Fe-evm.model.Fe1.2089	Ft-FtPinG0006042600.01.T01	9e-87
29- 4:	Fe-evm.model.Fe1.2094	Ft-FtPinG0006042300.01.T01	1e-82
29- 5:	Fe-evm.model.Fe1.2099	Ft-FtPinG0006041600.01.T01	1e-100
29- 6:	Fe-evm.model.Fe1.2106	Ft-FtPinG0006040400.01.T01	2e-108
29- 7:	Fe-evm.model.Fe1.2124	Ft-FtPinG0006038700.01.T01	9e-123
29- 8:	Fe-evm.model.Fe1.2155	Ft-FtPinG0006038100.01.T01	0
29- 9:	Fe-evm.model.Fe1.2166	Ft-FtPinG0001053600.01.T01	6e-44
29- 10:	Fe-evm.model.Fe1.2176	Ft-FtPinG0001053400.01.T01	7e-91
29- 11:	Fe-evm.model.Fe1.2180	Ft-FtPinG0001052700.01.T01	0
29- 12:	Fe-evm.model.Fe1.2182	Ft-FtPinG0001052600.01.T02	0
29- 13:	Fe-evm.model.Fe1.2227	Ft-FtPinG0001051900.01.T01	2e-109
29- 14:	Fe-evm.model.Fe1.2240	Ft-FtPinG0001050700.01.T01	0
29- 15:	Fe-evm.model.Fe1.2242	Ft-FtPinG0001049900.01.T01	0
## Alignment 30: score=717.0 e_value=3.7e-47 N=17 Fe-GWHBJBK00000001&Ft-Ft3 minus
30- 0:	Fe-evm.model.Fe1.10441	Ft-FtPinG0006391300.01.T01	2e-127
30- 1:	Fe-evm.model.Fe1.10475	Ft-FtPinG0006389600.01.T02	0
30- 2:	Fe-evm.model.Fe1.10485	Ft-FtPinG0006388000.01.T01	2e-65
30- 3:	Fe-evm.model.Fe1.10492	Ft-FtPinG0005077000.01.T01	1e-31
30- 4:	Fe-evm.model.Fe1.10493	Ft-FtPinG0005079400.01.T01	4e-11
30- 5:	Fe-evm.model.Fe1.10538	Ft-FtPinG0005084900.01.T01	0
30- 6:	Fe-evm.model.Fe1.10582	Ft-FtPinG0005089400.01.T01	2e-65
30- 7:	Fe-evm.model.Fe1.10600	Ft-FtPinG0005092500.01.T01	5e-100
30- 8:	Fe-evm.model.Fe1.10611	Ft-FtPinG0005093600.01.T01	0
30- 9:	Fe-evm.model.Fe1.10645	Ft-FtPinG0007624400.01.T01	1e-58
30- 10:	Fe-evm.model.Fe1.10668	Ft-FtPinG0007624200.01.T01	2e-59
30- 11:	Fe-evm.model.Fe1.10697	Ft-FtPinG0005355500.01.T01	0
30- 12:	Fe-evm.model.Fe1.10711	Ft-FtPinG0005356100.01.T01	0
30- 13:	Fe-evm.model.Fe1.10721	Ft-FtPinG0005356600.01.T01	0
30- 14:	Fe-evm.model.Fe1.10722	Ft-FtPinG0005356800.01.T01	1e-137
30- 15:	Fe-evm.model.Fe1.10785	Ft-FtPinG0001182600.01.T01	0
30- 16:	Fe-evm.model.Fe1.10857	Ft-FtPinG0001183000.01.T01	0
## Alignment 31: score=598.0 e_value=2.5e-36 N=13 Fe-GWHBJBK00000001&Ft-Ft3 minus
31- 0:	Fe-evm.model.Fe1.10031	Ft-FtPinG0007462700.01.T01	0
31- 1:	Fe-evm.model.Fe1.10043	Ft-FtPinG0007463000.01.T01	1e-31
31- 2:	Fe-evm.model.Fe1.10068	Ft-FtPinG0007463100.01.T01	3e-84
31- 3:	Fe-evm.model.Fe1.10069	Ft-FtPinG0007463400.01.T01	7e-70
31- 4:	Fe-evm.model.Fe1.10073	Ft-FtPinG0007464600.01.T01	0
31- 5:	Fe-evm.model.Fe1.10100	Ft-FtPinG0007467300.01.T01	0
31- 6:	Fe-evm.model.Fe1.10107	Ft-FtPinG0007467700.01.T01	5e-108
31- 7:	Fe-evm.model.Fe1.10144	Ft-FtPinG0007468900.01.T01	0
31- 8:	Fe-evm.model.Fe1.10152	Ft-FtPinG0007469900.01.T01	0
31- 9:	Fe-evm.model.Fe1.10155	Ft-FtPinG0007470900.01.T01	3e-147
31- 10:	Fe-evm.model.Fe1.10156	Ft-FtPinG0007471100.01.T01	2e-89
31- 11:	Fe-evm.model.Fe1.10160	Ft-FtPinG0007472400.01.T01	6e-76
31- 12:	Fe-evm.model.Fe1.10226	Ft-FtPinG0007476600.01.T01	5e-30
## Alignment 32: score=510.0 e_value=1.5e-23 N=11 Fe-GWHBJBK00000001&Ft-Ft3 minus
32- 0:	Fe-evm.model.Fe1.1862	Ft-FtPinG0000424700.01.T01	0
32- 1:	Fe-evm.model.Fe1.1880	Ft-FtPinG0000424300.01.T01	2e-50
32- 2:	Fe-evm.model.Fe1.1888	Ft-FtPinG0001078600.01.T01	6e-122
32- 3:	Fe-evm.model.Fe1.1898	Ft-FtPinG0001079400.01.T01	2e-120
32- 4:	Fe-evm.model.Fe1.1906	Ft-FtPinG0005163900.01.T01	4e-56
32- 5:	Fe-evm.model.Fe1.1917	Ft-FtPinG0006080500.01.T01	2e-59
32- 6:	Fe-evm.model.Fe1.1927	Ft-FtPinG0006081400.01.T01	0
32- 7:	Fe-evm.model.Fe1.1932	Ft-FtPinG0006081700.01.T01	2e-157
32- 8:	Fe-evm.model.Fe1.1933	Ft-FtPinG0006082000.01.T01	4e-56
32- 9:	Fe-evm.model.Fe1.1965	Ft-FtPinG0006082900.01.T01	0
32- 10:	Fe-evm.model.Fe1.1969	Ft-FtPinG0006083600.01.T01	2e-83
## Alignment 33: score=483.0 e_value=2.4e-25 N=11 Fe-GWHBJBK00000001&Ft-Ft3 minus
33- 0:	Fe-evm.model.Fe1.9609	Ft-FtPinG0001726300.01.T01	0
33- 1:	Fe-evm.model.Fe1.9639	Ft-FtPinG0001727400.01.T01	3e-128
33- 2:	Fe-evm.model.Fe1.9662	Ft-FtPinG0001729300.01.T01	4e-142
33- 3:	Fe-evm.model.Fe1.9678	Ft-FtPinG0001730500.01.T01	0
33- 4:	Fe-evm.model.Fe1.9808	Ft-FtPinG0001732400.01.T01	0
33- 5:	Fe-evm.model.Fe1.9820	Ft-FtPinG0001734700.01.T01	2e-13
33- 6:	Fe-evm.model.Fe1.9825	Ft-FtPinG0001735200.01.T01	6e-65
33- 7:	Fe-evm.model.Fe1.9829	Ft-FtPinG0001735300.01.T01	1e-75
33- 8:	Fe-evm.model.Fe1.9845	Ft-FtPinG0001735600.01.T01	6e-86
33- 9:	Fe-evm.model.Fe1.9887	Ft-FtPinG0001736300.01.T01	4e-109
33- 10:	Fe-evm.model.Fe1.9909	Ft-FtPinG0000414800.01.T01	3e-52
## Alignment 34: score=455.0 e_value=8e-22 N=10 Fe-GWHBJBK00000001&Ft-Ft3 minus
34- 0:	Fe-evm.model.Fe1.13418	Ft-FtPinG0000960000.01.T01	2e-93
34- 1:	Fe-evm.model.Fe1.13422	Ft-FtPinG0000960700.01.T01	0
34- 2:	Fe-evm.model.Fe1.13426	Ft-FtPinG0000960900.01.T01	2e-70
34- 3:	Fe-evm.model.Fe1.13445	Ft-FtPinG0007662200.01.T01	0
34- 4:	Fe-evm.model.Fe1.13450	Ft-FtPinG0001001800.01.T01	0
34- 5:	Fe-evm.model.Fe1.13456	Ft-FtPinG0001002000.01.T01	4e-105
34- 6:	Fe-evm.model.Fe1.13463	Ft-FtPinG0004490000.01.T01	4e-124
34- 7:	Fe-evm.model.Fe1.13467	Ft-FtPinG0004844400.01.T01	2e-70
34- 8:	Fe-evm.model.Fe1.13471	Ft-FtPinG0004843600.01.T01	0
34- 9:	Fe-evm.model.Fe1.13504	Ft-FtPinG0004842600.01.T01	0
## Alignment 35: score=385.0 e_value=2e-21 N=9 Fe-GWHBJBK00000001&Ft-Ft3 minus
35- 0:	Fe-evm.model.Fe1.13637	Ft-FtPinG0008941800.01.T01	8e-67
35- 1:	Fe-evm.model.Fe1.13646	Ft-FtPinG0008941400.01.T01	5e-64
35- 2:	Fe-evm.model.Fe1.13689	Ft-FtPinG0008940900.01.T01	0
35- 3:	Fe-evm.model.Fe1.13691	Ft-FtPinG0008940500.01.T01	0
35- 4:	Fe-evm.model.Fe1.13737	Ft-FtPinG0009432800.01.T01	1e-63
35- 5:	Fe-evm.model.Fe1.13739	Ft-FtPinG0009432500.01.T01	4e-64
35- 6:	Fe-evm.model.Fe1.13755	Ft-FtPinG0009429900.01.T01	0
35- 7:	Fe-evm.model.Fe1.13767	Ft-FtPinG0009427400.01.T01	0
35- 8:	Fe-evm.model.Fe1.13768	Ft-FtPinG0003532000.01.T01	0
## Alignment 36: score=367.0 e_value=1.8e-15 N=8 Fe-GWHBJBK00000001&Ft-Ft3 minus
36- 0:	Fe-evm.model.Fe1.2359	Ft-FtPinG0004809100.01.T01	6e-178
36- 1:	Fe-evm.model.Fe1.2365	Ft-FtPinG0004809400.01.T01	1e-45
36- 2:	Fe-evm.model.Fe1.2368	Ft-FtPinG0004810800.01.T01	0
36- 3:	Fe-evm.model.Fe1.2371	Ft-FtPinG0004812200.01.T01	0
36- 4:	Fe-evm.model.Fe1.2379	Ft-FtPinG0004812400.01.T01	0
36- 5:	Fe-evm.model.Fe1.2415	Ft-FtPinG0004814500.01.T01	3e-34
36- 6:	Fe-evm.model.Fe1.2469	Ft-FtPinG0009101700.01.T01	0
36- 7:	Fe-evm.model.Fe1.2483	Ft-FtPinG0009103100.01.T01	2e-175
## Alignment 37: score=366.0 e_value=1.3e-16 N=8 Fe-GWHBJBK00000001&Ft-Ft3 minus
37- 0:	Fe-evm.model.Fe1.10031	Ft-FtPinG0000399800.01.T02	0
37- 1:	Fe-evm.model.Fe1.10053	Ft-FtPinG0000399100.01.T02	0
37- 2:	Fe-evm.model.Fe1.10062	Ft-FtPinG0000399000.01.T01	3e-178
37- 3:	Fe-evm.model.Fe1.10064	Ft-FtPinG0000398700.01.T01	5e-83
37- 4:	Fe-evm.model.Fe1.10069	Ft-FtPinG0000397900.01.T01	7e-70
37- 5:	Fe-evm.model.Fe1.10100	Ft-FtPinG0005570600.01.T01	0
37- 6:	Fe-evm.model.Fe1.10110	Ft-FtPinG0005569600.01.T01	1e-60
37- 7:	Fe-evm.model.Fe1.10152	Ft-FtPinG0005567200.01.T01	0
## Alignment 38: score=320.0 e_value=1.7e-13 N=8 Fe-GWHBJBK00000001&Ft-Ft4 plus
38- 0:	Fe-evm.model.Fe1.1244	Ft-FtPinG0008100800.01.T01	9e-25
38- 1:	Fe-evm.model.Fe1.1252	Ft-FtPinG0008098500.01.T01	6e-22
38- 2:	Fe-evm.model.Fe1.1256	Ft-FtPinG0008097000.01.T01	1e-17
38- 3:	Fe-evm.model.Fe1.1290	Ft-FtPinG0008091100.01.T01	4e-13
38- 4:	Fe-evm.model.Fe1.1307	Ft-FtPinG0008085400.01.T02	1e-18
38- 5:	Fe-evm.model.Fe1.1335	Ft-FtPinG0008083800.01.T01	1e-21
38- 6:	Fe-evm.model.Fe1.1337	Ft-FtPinG0008081700.01.T01	1e-84
38- 7:	Fe-evm.model.Fe1.1359	Ft-FtPinG0008078900.01.T01	9e-20
## Alignment 39: score=281.0 e_value=7.7e-14 N=7 Fe-GWHBJBK00000001&Ft-Ft4 plus
39- 0:	Fe-evm.model.Fe1.629	Ft-FtPinG0008656500.01.T01	2e-27
39- 1:	Fe-evm.model.Fe1.666	Ft-FtPinG0008648900.01.T01	5e-20
39- 2:	Fe-evm.model.Fe1.692	Ft-FtPinG0008646200.01.T01	4e-80
39- 3:	Fe-evm.model.Fe1.706	Ft-FtPinG0005274200.01.T01	2e-21
39- 4:	Fe-evm.model.Fe1.707	Ft-FtPinG0005273900.01.T01	6e-19
39- 5:	Fe-evm.model.Fe1.713	Ft-FtPinG0005273500.01.T01	7e-50
39- 6:	Fe-evm.model.Fe1.729	Ft-FtPinG0005268900.01.T01	2e-48
## Alignment 40: score=276.0 e_value=6.9e-09 N=6 Fe-GWHBJBK00000001&Ft-Ft4 plus
40- 0:	Fe-evm.model.Fe1.11992	Ft-FtPinG0008515200.01.T01	6e-17
40- 1:	Fe-evm.model.Fe1.12027	Ft-FtPinG0008511600.01.T01	6e-48
40- 2:	Fe-evm.model.Fe1.12048	Ft-FtPinG0008510700.01.T01	1e-11
40- 3:	Fe-evm.model.Fe1.12059	Ft-FtPinG0008510400.01.T01	4e-20
40- 4:	Fe-evm.model.Fe1.12072	Ft-FtPinG0008509800.01.T01	6e-30
40- 5:	Fe-evm.model.Fe1.12076	Ft-FtPinG0008509200.01.T01	2e-18
## Alignment 41: score=254.0 e_value=4.1e-11 N=7 Fe-GWHBJBK00000001&Ft-Ft4 plus
41- 0:	Fe-evm.model.Fe1.9167	Ft-FtPinG0008467000.01.T02	5e-28
41- 1:	Fe-evm.model.Fe1.9287	Ft-FtPinG0009189500.01.T01	2e-54
41- 2:	Fe-evm.model.Fe1.9338	Ft-FtPinG0003482500.01.T01	4e-59
41- 3:	Fe-evm.model.Fe1.9402	Ft-FtPinG0003481100.01.T01	7e-33
41- 4:	Fe-evm.model.Fe1.9466	Ft-FtPinG0003477300.01.T01	7e-12
41- 5:	Fe-evm.model.Fe1.9652	Ft-FtPinG0005213400.01.T01	0
41- 6:	Fe-evm.model.Fe1.9678	Ft-FtPinG0003491100.01.T01	2e-28
## Alignment 42: score=557.0 e_value=1.4e-29 N=13 Fe-GWHBJBK00000001&Ft-Ft4 minus
42- 0:	Fe-evm.model.Fe1.89	Ft-FtPinG0005441000.01.T01	3e-80
42- 1:	Fe-evm.model.Fe1.93	Ft-FtPinG0005440400.01.T01	1e-21
42- 2:	Fe-evm.model.Fe1.98	Ft-FtPinG0005438900.01.T01	1e-79
42- 3:	Fe-evm.model.Fe1.115	Ft-FtPinG0008355900.01.T01	5e-27
42- 4:	Fe-evm.model.Fe1.119	Ft-FtPinG0008354600.01.T01	7e-16
42- 5:	Fe-evm.model.Fe1.130	Ft-FtPinG0008352700.01.T01	4e-27
42- 6:	Fe-evm.model.Fe1.151	Ft-FtPinG0008347900.01.T01	4e-22
42- 7:	Fe-evm.model.Fe1.153	Ft-FtPinG0008347500.01.T01	5e-15
42- 8:	Fe-evm.model.Fe1.173	Ft-FtPinG0008919600.01.T01	6e-93
42- 9:	Fe-evm.model.Fe1.178	Ft-FtPinG0008918000.01.T02	8e-29
42- 10:	Fe-evm.model.Fe1.180	Ft-FtPinG0008917300.01.T01	9e-17
42- 11:	Fe-evm.model.Fe1.188	Ft-FtPinG0008915200.01.T01	5e-52
42- 12:	Fe-evm.model.Fe1.200	Ft-FtPinG0008913600.01.T01	7e-52
## Alignment 43: score=375.0 e_value=8e-17 N=9 Fe-GWHBJBK00000001&Ft-Ft4 minus
43- 0:	Fe-evm.model.Fe1.13690	Ft-FtPinG0001159000.01.T02	4e-17
43- 1:	Fe-evm.model.Fe1.13694	Ft-FtPinG0001160000.01.T01	7e-29
43- 2:	Fe-evm.model.Fe1.13699	Ft-FtPinG0001161100.01.T01	2e-13
43- 3:	Fe-evm.model.Fe1.13714	Ft-FtPinG0001165700.01.T01	4e-14
43- 4:	Fe-evm.model.Fe1.13720	Ft-FtPinG0001169000.01.T01	4e-61
43- 5:	Fe-evm.model.Fe1.13731	Ft-FtPinG0001170700.01.T01	5e-73
43- 6:	Fe-evm.model.Fe1.13739	Ft-FtPinG0001172200.01.T01	1e-80
43- 7:	Fe-evm.model.Fe1.13769	Ft-FtPinG0001178200.01.T01	3e-27
43- 8:	Fe-evm.model.Fe1.13796	Ft-FtPinG0006746600.01.T01	3e-30
## Alignment 44: score=364.0 e_value=1.6e-16 N=9 Fe-GWHBJBK00000001&Ft-Ft4 minus
44- 0:	Fe-evm.model.Fe1.6381	Ft-FtPinG0007291800.01.T01	3e-16
44- 1:	Fe-evm.model.Fe1.6508	Ft-FtPinG0007295400.01.T01	5e-33
44- 2:	Fe-evm.model.Fe1.6534	Ft-FtPinG0004924000.01.T01	8e-14
44- 3:	Fe-evm.model.Fe1.6568	Ft-FtPinG0008059200.01.T02	4e-15
44- 4:	Fe-evm.model.Fe1.6587	Ft-FtPinG0008060600.01.T01	4e-35
44- 5:	Fe-evm.model.Fe1.6616	Ft-FtPinG0008062100.01.T01	8e-33
44- 6:	Fe-evm.model.Fe1.6805	Ft-FtPinG0004749400.01.T01	5e-29
44- 7:	Fe-evm.model.Fe1.6874	Ft-FtPinG0006605400.01.T01	1e-18
44- 8:	Fe-evm.model.Fe1.6925	Ft-FtPinG0004307100.01.T01	6e-18
## Alignment 45: score=362.0 e_value=2.6e-18 N=9 Fe-GWHBJBK00000001&Ft-Ft4 minus
45- 0:	Fe-evm.model.Fe1.13150	Ft-FtPinG0006674100.01.T01	2e-12
45- 1:	Fe-evm.model.Fe1.13186	Ft-FtPinG0006677900.01.T01	5e-42
45- 2:	Fe-evm.model.Fe1.13195	Ft-FtPinG0006679300.01.T01	3e-47
45- 3:	Fe-evm.model.Fe1.13205	Ft-FtPinG0006681600.01.T02	3e-124
45- 4:	Fe-evm.model.Fe1.13210	Ft-FtPinG0006683400.01.T01	1e-14
45- 5:	Fe-evm.model.Fe1.13273	Ft-FtPinG0006690500.01.T01	0
45- 6:	Fe-evm.model.Fe1.13297	Ft-FtPinG0006696100.01.T01	2e-43
45- 7:	Fe-evm.model.Fe1.13299	Ft-FtPinG0006696900.01.T01	6e-22
45- 8:	Fe-evm.model.Fe1.13309	Ft-FtPinG0006697400.01.T01	1e-31
## Alignment 46: score=357.0 e_value=1.4e-16 N=8 Fe-GWHBJBK00000001&Ft-Ft4 minus
46- 0:	Fe-evm.model.Fe1.12503	Ft-FtPinG0004592500.01.T01	6e-35
46- 1:	Fe-evm.model.Fe1.12514	Ft-FtPinG0004590400.01.T01	8e-19
46- 2:	Fe-evm.model.Fe1.12516	Ft-FtPinG0004590200.01.T01	4e-13
46- 3:	Fe-evm.model.Fe1.12519	Ft-FtPinG0004588900.01.T01	2e-20
46- 4:	Fe-evm.model.Fe1.12532	Ft-FtPinG0004587200.01.T01	2e-29
46- 5:	Fe-evm.model.Fe1.12533	Ft-FtPinG0004586800.01.T01	4e-31
46- 6:	Fe-evm.model.Fe1.12560	Ft-FtPinG0004586100.01.T01	1e-22
46- 7:	Fe-evm.model.Fe1.12592	Ft-FtPinG0000044300.01.T01	1e-38
## Alignment 47: score=356.0 e_value=2.6e-18 N=9 Fe-GWHBJBK00000001&Ft-Ft4 minus
47- 0:	Fe-evm.model.Fe1.10425	Ft-FtPinG0006703800.01.T01	6e-90
47- 1:	Fe-evm.model.Fe1.10459	Ft-FtPinG0007628700.01.T01	9e-18
47- 2:	Fe-evm.model.Fe1.10484	Ft-FtPinG0007629700.01.T01	2e-33
47- 3:	Fe-evm.model.Fe1.10492	Ft-FtPinG0007631400.01.T01	0
47- 4:	Fe-evm.model.Fe1.10580	Ft-FtPinG0008418900.01.T01	1e-21
47- 5:	Fe-evm.model.Fe1.10697	Ft-FtPinG0004904400.01.T01	1e-18
47- 6:	Fe-evm.model.Fe1.10711	Ft-FtPinG0004744300.01.T01	1e-14
47- 7:	Fe-evm.model.Fe1.10721	Ft-FtPinG0004747000.01.T01	3e-126
47- 8:	Fe-evm.model.Fe1.10785	Ft-FtPinG0009660800.01.T02	4e-15
## Alignment 48: score=282.0 e_value=3.1e-14 N=7 Fe-GWHBJBK00000001&Ft-Ft4 minus
48- 0:	Fe-evm.model.Fe1.12608	Ft-FtPinG0004587200.01.T01	2e-29
48- 1:	Fe-evm.model.Fe1.12609	Ft-FtPinG0004586800.01.T01	1e-30
48- 2:	Fe-evm.model.Fe1.12619	Ft-FtPinG0004586100.01.T01	2e-18
48- 3:	Fe-evm.model.Fe1.12656	Ft-FtPinG0000044300.01.T01	2e-51
48- 4:	Fe-evm.model.Fe1.12700	Ft-FtPinG0004498000.01.T01	4e-12
48- 5:	Fe-evm.model.Fe1.12714	Ft-FtPinG0004502500.01.T01	3e-15
48- 6:	Fe-evm.model.Fe1.12762	Ft-FtPinG0004508000.01.T01	1e-16
## Alignment 49: score=1092.0 e_value=4.1e-72 N=24 Fe-GWHBJBK00000001&Ft-Ft5 plus
49- 0:	Fe-evm.model.Fe1.24	Ft-FtPinG0004237400.01.T01	2e-64
49- 1:	Fe-evm.model.Fe1.27	Ft-FtPinG0004236400.01.T01	9e-133
49- 2:	Fe-evm.model.Fe1.30	Ft-FtPinG0004233900.01.T01	1e-62
49- 3:	Fe-evm.model.Fe1.33	Ft-FtPinG0004232500.01.T01	0
49- 4:	Fe-evm.model.Fe1.35	Ft-FtPinG0004231900.01.T01	7e-91
49- 5:	Fe-evm.model.Fe1.37	Ft-FtPinG0004231400.01.T01	1e-72
49- 6:	Fe-evm.model.Fe1.47	Ft-FtPinG0004229600.01.T01	3e-158
49- 7:	Fe-evm.model.Fe1.50	Ft-FtPinG0004229400.01.T01	1e-38
49- 8:	Fe-evm.model.Fe1.54	Ft-FtPinG0004229000.01.T01	0
49- 9:	Fe-evm.model.Fe1.63	Ft-FtPinG0004228700.01.T01	0
49- 10:	Fe-evm.model.Fe1.66	Ft-FtPinG0004228500.01.T01	0
49- 11:	Fe-evm.model.Fe1.69	Ft-FtPinG0004224800.01.T01	2e-33
49- 12:	Fe-evm.model.Fe1.72	Ft-FtPinG0004224200.01.T01	2e-98
49- 13:	Fe-evm.model.Fe1.80	Ft-FtPinG0004219700.01.T01	8e-35
49- 14:	Fe-evm.model.Fe1.86	Ft-FtPinG0008870600.01.T01	7e-56
49- 15:	Fe-evm.model.Fe1.93	Ft-FtPinG0008870700.01.T01	0
49- 16:	Fe-evm.model.Fe1.95	Ft-FtPinG0008871300.01.T01	7e-145
49- 17:	Fe-evm.model.Fe1.96	Ft-FtPinG0008871800.01.T01	0
49- 18:	Fe-evm.model.Fe1.97	Ft-FtPinG0008872200.01.T01	0
49- 19:	Fe-evm.model.Fe1.100	Ft-FtPinG0008876600.01.T01	0
49- 20:	Fe-evm.model.Fe1.104	Ft-FtPinG0008877100.01.T01	9e-89
49- 21:	Fe-evm.model.Fe1.111	Ft-FtPinG0003053100.01.T01	1e-102
49- 22:	Fe-evm.model.Fe1.112	Ft-FtPinG0003052600.01.T01	0
49- 23:	Fe-evm.model.Fe1.113	Ft-FtPinG0003052100.01.T01	4e-66
## Alignment 50: score=589.0 e_value=7.3e-30 N=13 Fe-GWHBJBK00000001&Ft-Ft5 plus
50- 0:	Fe-evm.model.Fe1.14157	Ft-FtPinG0003141800.01.T01	5e-146
50- 1:	Fe-evm.model.Fe1.14160	Ft-FtPinG0003141300.01.T01	6e-54
50- 2:	Fe-evm.model.Fe1.14165	Ft-FtPinG0003139300.01.T01	0
50- 3:	Fe-evm.model.Fe1.14174	Ft-FtPinG0003138800.01.T01	0
50- 4:	Fe-evm.model.Fe1.14214	Ft-FtPinG0003136700.01.T01	3e-155
50- 5:	Fe-evm.model.Fe1.14228	Ft-FtPinG0003134900.01.T01	1e-130
50- 6:	Fe-evm.model.Fe1.14230	Ft-FtPinG0003134600.01.T01	7e-123
50- 7:	Fe-evm.model.Fe1.14235	Ft-FtPinG0003134000.01.T01	0
50- 8:	Fe-evm.model.Fe1.14238	Ft-FtPinG0003133100.01.T01	0
50- 9:	Fe-evm.model.Fe1.14242	Ft-FtPinG0003133000.01.T01	0
50- 10:	Fe-evm.model.Fe1.14248	Ft-FtPinG0003131500.01.T01	2e-78
50- 11:	Fe-evm.model.Fe1.14250	Ft-FtPinG0003130600.01.T01	1e-142
50- 12:	Fe-evm.model.Fe1.14252	Ft-FtPinG0003130400.01.T01	8e-139
## Alignment 51: score=524.0 e_value=6e-28 N=12 Fe-GWHBJBK00000001&Ft-Ft5 plus
51- 0:	Fe-evm.model.Fe1.13341	Ft-FtPinG0003117700.01.T01	3e-12
51- 1:	Fe-evm.model.Fe1.13353	Ft-FtPinG0003115800.01.T01	2e-140
51- 2:	Fe-evm.model.Fe1.13401	Ft-FtPinG0009307300.01.T01	8e-138
51- 3:	Fe-evm.model.Fe1.13422	Ft-FtPinG0009308300.01.T01	0
51- 4:	Fe-evm.model.Fe1.13426	Ft-FtPinG0009308500.01.T01	9e-74
51- 5:	Fe-evm.model.Fe1.13445	Ft-FtPinG0009310400.01.T01	2e-149
51- 6:	Fe-evm.model.Fe1.13446	Ft-FtPinG0009310800.01.T01	7e-43
51- 7:	Fe-evm.model.Fe1.13450	Ft-FtPinG0009311400.01.T01	0
51- 8:	Fe-evm.model.Fe1.13452	Ft-FtPinG0009311600.01.T01	0
51- 9:	Fe-evm.model.Fe1.13467	Ft-FtPinG0009313500.01.T01	2e-65
51- 10:	Fe-evm.model.Fe1.13471	Ft-FtPinG0008955100.01.T01	1e-141
51- 11:	Fe-evm.model.Fe1.13504	Ft-FtPinG0008955700.01.T01	0
## Alignment 52: score=479.0 e_value=4.1e-24 N=11 Fe-GWHBJBK00000001&Ft-Ft5 plus
52- 0:	Fe-evm.model.Fe1.2731	Ft-FtPinG0000470600.01.T01	0
52- 1:	Fe-evm.model.Fe1.2734	Ft-FtPinG0000472200.01.T01	3e-74
52- 2:	Fe-evm.model.Fe1.2750	Ft-FtPinG0000477600.01.T01	0
52- 3:	Fe-evm.model.Fe1.2752	Ft-FtPinG0000480300.01.T01	0
52- 4:	Fe-evm.model.Fe1.2762	Ft-FtPinG0000481500.01.T01	0
52- 5:	Fe-evm.model.Fe1.2782	Ft-FtPinG0000483100.01.T01	0
52- 6:	Fe-evm.model.Fe1.2783	Ft-FtPinG0000484200.01.T01	0
52- 7:	Fe-evm.model.Fe1.2804	Ft-FtPinG0000484500.01.T01	0
52- 8:	Fe-evm.model.Fe1.2820	Ft-FtPinG0000486700.01.T02	0
52- 9:	Fe-evm.model.Fe1.2867	Ft-FtPinG0000492200.01.T01	2e-126
52- 10:	Fe-evm.model.Fe1.2927	Ft-FtPinG0000492800.01.T01	6e-171
## Alignment 53: score=415.0 e_value=7.4e-18 N=9 Fe-GWHBJBK00000001&Ft-Ft5 plus
53- 0:	Fe-evm.model.Fe1.14017	Ft-FtPinG0004659700.01.T01	0
53- 1:	Fe-evm.model.Fe1.14025	Ft-FtPinG0004661000.01.T01	0
53- 2:	Fe-evm.model.Fe1.14026	Ft-FtPinG0004661400.01.T01	1e-72
53- 3:	Fe-evm.model.Fe1.14055	Ft-FtPinG0004666700.01.T01	3e-51
53- 4:	Fe-evm.model.Fe1.14056	Ft-FtPinG0004667200.01.T01	5e-57
53- 5:	Fe-evm.model.Fe1.14057	Ft-FtPinG0004667800.01.T01	2e-11
53- 6:	Fe-evm.model.Fe1.14060	Ft-FtPinG0004668400.01.T02	7e-126
53- 7:	Fe-evm.model.Fe1.14062	Ft-FtPinG0004668900.01.T01	0
53- 8:	Fe-evm.model.Fe1.14064	Ft-FtPinG0004669500.01.T01	2e-59
## Alignment 54: score=359.0 e_value=1.1e-15 N=8 Fe-GWHBJBK00000001&Ft-Ft5 plus
54- 0:	Fe-evm.model.Fe1.152	Ft-FtPinG0003050700.01.T01	3e-93
54- 1:	Fe-evm.model.Fe1.154	Ft-FtPinG0003048900.01.T01	0
54- 2:	Fe-evm.model.Fe1.155	Ft-FtPinG0003047300.01.T01	0
54- 3:	Fe-evm.model.Fe1.156	Ft-FtPinG0003046900.01.T01	2e-28
54- 4:	Fe-evm.model.Fe1.176	Ft-FtPinG0003045600.01.T01	2e-102
54- 5:	Fe-evm.model.Fe1.178	Ft-FtPinG0003043400.01.T01	0
54- 6:	Fe-evm.model.Fe1.180	Ft-FtPinG0003043100.01.T01	3e-33
54- 7:	Fe-evm.model.Fe1.189	Ft-FtPinG0003042400.01.T01	2e-153
## Alignment 55: score=325.0 e_value=9.6e-12 N=7 Fe-GWHBJBK00000001&Ft-Ft5 plus
55- 0:	Fe-evm.model.Fe1.388	Ft-FtPinG0005650000.01.T01	0
55- 1:	Fe-evm.model.Fe1.392	Ft-FtPinG0005650500.01.T01	2e-110
55- 2:	Fe-evm.model.Fe1.409	Ft-FtPinG0005651100.01.T03	0
55- 3:	Fe-evm.model.Fe1.410	Ft-FtPinG0005651300.01.T01	3e-31
55- 4:	Fe-evm.model.Fe1.412	Ft-FtPinG0005651900.01.T01	7e-141
55- 5:	Fe-evm.model.Fe1.423	Ft-FtPinG0005652800.01.T01	2e-68
55- 6:	Fe-evm.model.Fe1.425	Ft-FtPinG0005653400.01.T01	2e-34
## Alignment 56: score=294.0 e_value=5.5e-12 N=7 Fe-GWHBJBK00000001&Ft-Ft5 plus
56- 0:	Fe-evm.model.Fe1.13691	Ft-FtPinG0008962800.01.T01	0
56- 1:	Fe-evm.model.Fe1.13735	Ft-FtPinG0001333400.01.T01	0
56- 2:	Fe-evm.model.Fe1.13752	Ft-FtPinG0001334300.01.T01	4e-99
56- 3:	Fe-evm.model.Fe1.13759	Ft-FtPinG0001335100.01.T01	1e-178
56- 4:	Fe-evm.model.Fe1.13777	Ft-FtPinG0001337300.01.T01	0
56- 5:	Fe-evm.model.Fe1.13781	Ft-FtPinG0001337500.01.T01	1e-107
56- 6:	Fe-evm.model.Fe1.13793	Ft-FtPinG0001338200.01.T01	0
## Alignment 57: score=283.0 e_value=5.3e-08 N=6 Fe-GWHBJBK00000001&Ft-Ft5 plus
57- 0:	Fe-evm.model.Fe1.290	Ft-FtPinG0004576800.01.T01	0
57- 1:	Fe-evm.model.Fe1.291	Ft-FtPinG0004576400.01.T01	0
57- 2:	Fe-evm.model.Fe1.294	Ft-FtPinG0004575200.01.T01	6e-101
57- 3:	Fe-evm.model.Fe1.300	Ft-FtPinG0004574300.01.T01	8e-41
57- 4:	Fe-evm.model.Fe1.306	Ft-FtPinG0004573400.01.T01	3e-67
57- 5:	Fe-evm.model.Fe1.313	Ft-FtPinG0004572000.01.T01	0
## Alignment 58: score=1356.0 e_value=1.7e-97 N=30 Fe-GWHBJBK00000001&Ft-Ft5 minus
58- 0:	Fe-evm.model.Fe1.1862	Ft-FtPinG0003138800.01.T01	0
58- 1:	Fe-evm.model.Fe1.1883	Ft-FtPinG0003139100.01.T01	8e-167
58- 2:	Fe-evm.model.Fe1.1884	Ft-FtPinG0003139300.01.T01	0
58- 3:	Fe-evm.model.Fe1.1903	Ft-FtPinG0003141300.01.T01	3e-76
58- 4:	Fe-evm.model.Fe1.1907	Ft-FtPinG0003141800.01.T01	2e-154
58- 5:	Fe-evm.model.Fe1.1917	Ft-FtPinG0003141900.01.T01	6e-125
58- 6:	Fe-evm.model.Fe1.1933	Ft-FtPinG0003143000.01.T01	4e-63
58- 7:	Fe-evm.model.Fe1.1966	Ft-FtPinG0004685000.01.T01	8e-20
58- 8:	Fe-evm.model.Fe1.2009	Ft-FtPinG0004684600.01.T01	2e-50
58- 9:	Fe-evm.model.Fe1.2025	Ft-FtPinG0004684100.01.T01	1e-22
58- 10:	Fe-evm.model.Fe1.2039	Ft-FtPinG0004683000.01.T01	4e-107
58- 11:	Fe-evm.model.Fe1.2043	Ft-FtPinG0004682800.01.T01	0
58- 12:	Fe-evm.model.Fe1.2044	Ft-FtPinG0004682500.01.T01	0
58- 13:	Fe-evm.model.Fe1.2059	Ft-FtPinG0004681700.01.T01	0
58- 14:	Fe-evm.model.Fe1.2065	Ft-FtPinG0004680800.01.T02	0
58- 15:	Fe-evm.model.Fe1.2088	Ft-FtPinG0004679600.01.T01	3e-132
58- 16:	Fe-evm.model.Fe1.2089	Ft-FtPinG0004679200.01.T01	5e-39
58- 17:	Fe-evm.model.Fe1.2099	Ft-FtPinG0004678400.01.T01	2e-94
58- 18:	Fe-evm.model.Fe1.2106	Ft-FtPinG0004677000.01.T02	5e-131
58- 19:	Fe-evm.model.Fe1.2109	Ft-FtPinG0004676400.01.T01	2e-34
58- 20:	Fe-evm.model.Fe1.2131	Ft-FtPinG0004674300.01.T01	0
58- 21:	Fe-evm.model.Fe1.2148	Ft-FtPinG0004669500.01.T01	4e-44
58- 22:	Fe-evm.model.Fe1.2155	Ft-FtPinG0004668900.01.T01	0
58- 23:	Fe-evm.model.Fe1.2166	Ft-FtPinG0004668800.01.T01	8e-41
58- 24:	Fe-evm.model.Fe1.2176	Ft-FtPinG0004668400.01.T02	9e-109
58- 25:	Fe-evm.model.Fe1.2182	Ft-FtPinG0004667200.01.T01	1e-66
58- 26:	Fe-evm.model.Fe1.2226	Ft-FtPinG0004667000.01.T01	7e-87
58- 27:	Fe-evm.model.Fe1.2227	Ft-FtPinG0004666700.01.T01	5e-52
58- 28:	Fe-evm.model.Fe1.2238	Ft-FtPinG0004666300.01.T01	1e-49
58- 29:	Fe-evm.model.Fe1.2249	Ft-FtPinG0004665500.01.T01	8e-163
## Alignment 59: score=1002.0 e_value=1.7e-66 N=23 Fe-GWHBJBK00000001&Ft-Ft5 minus
59- 0:	Fe-evm.model.Fe1.1331	Ft-FtPinG0003115600.01.T01	2e-122
59- 1:	Fe-evm.model.Fe1.1340	Ft-FtPinG0003115800.01.T01	7e-151
59- 2:	Fe-evm.model.Fe1.1346	Ft-FtPinG0003118000.01.T01	9e-111
59- 3:	Fe-evm.model.Fe1.1354	Ft-FtPinG0003118200.01.T01	0
59- 4:	Fe-evm.model.Fe1.1377	Ft-FtPinG0003119400.01.T01	6e-59
59- 5:	Fe-evm.model.Fe1.1381	Ft-FtPinG0003119500.01.T01	0
59- 6:	Fe-evm.model.Fe1.1382	Ft-FtPinG0003119800.01.T01	1e-114
59- 7:	Fe-evm.model.Fe1.1384	Ft-FtPinG0003120700.01.T01	3e-28
59- 8:	Fe-evm.model.Fe1.1401	Ft-FtPinG0003123600.01.T01	3e-51
59- 9:	Fe-evm.model.Fe1.1414	Ft-FtPinG0003124000.01.T01	2e-85
59- 10:	Fe-evm.model.Fe1.1440	Ft-FtPinG0003124200.01.T01	0
59- 11:	Fe-evm.model.Fe1.1468	Ft-FtPinG0003124300.01.T01	1e-11
59- 12:	Fe-evm.model.Fe1.1491	Ft-FtPinG0003125100.01.T01	8e-23
59- 13:	Fe-evm.model.Fe1.1522	Ft-FtPinG0003128500.01.T01	0
59- 14:	Fe-evm.model.Fe1.1543	Ft-FtPinG0003129800.01.T01	0
59- 15:	Fe-evm.model.Fe1.1573	Ft-FtPinG0003130600.01.T01	6e-156
59- 16:	Fe-evm.model.Fe1.1588	Ft-FtPinG0003131400.01.T01	0
59- 17:	Fe-evm.model.Fe1.1599	Ft-FtPinG0003131500.01.T01	2e-79
59- 18:	Fe-evm.model.Fe1.1611	Ft-FtPinG0003132700.01.T01	3e-69
59- 19:	Fe-evm.model.Fe1.1625	Ft-FtPinG0003133000.01.T01	0
59- 20:	Fe-evm.model.Fe1.1644	Ft-FtPinG0003134000.01.T01	0
59- 21:	Fe-evm.model.Fe1.1645	Ft-FtPinG0003134900.01.T01	6e-118
59- 22:	Fe-evm.model.Fe1.1655	Ft-FtPinG0003135100.01.T01	2e-95
## Alignment 60: score=909.0 e_value=2.5e-56 N=21 Fe-GWHBJBK00000001&Ft-Ft5 minus
60- 0:	Fe-evm.model.Fe1.13831	Ft-FtPinG0000494300.01.T01	2e-39
60- 1:	Fe-evm.model.Fe1.13844	Ft-FtPinG0000492500.01.T01	0
60- 2:	Fe-evm.model.Fe1.13852	Ft-FtPinG0000489700.01.T01	0
60- 3:	Fe-evm.model.Fe1.13853	Ft-FtPinG0000487200.01.T01	0
60- 4:	Fe-evm.model.Fe1.13861	Ft-FtPinG0000486100.01.T01	0
60- 5:	Fe-evm.model.Fe1.13868	Ft-FtPinG0000484800.01.T01	0
60- 6:	Fe-evm.model.Fe1.13894	Ft-FtPinG0000484300.01.T01	4e-133
60- 7:	Fe-evm.model.Fe1.13912	Ft-FtPinG0000480300.01.T01	0
60- 8:	Fe-evm.model.Fe1.13914	Ft-FtPinG0000473600.01.T01	0
60- 9:	Fe-evm.model.Fe1.13918	Ft-FtPinG0000472200.01.T01	8e-52
60- 10:	Fe-evm.model.Fe1.13920	Ft-FtPinG0000470800.01.T01	8e-169
60- 11:	Fe-evm.model.Fe1.13928	Ft-FtPinG0000470200.01.T01	0
60- 12:	Fe-evm.model.Fe1.13932	Ft-FtPinG0000467400.01.T01	0
60- 13:	Fe-evm.model.Fe1.13946	Ft-FtPinG0000463900.01.T01	9e-15
60- 14:	Fe-evm.model.Fe1.13947	Ft-FtPinG0000463600.01.T01	0
60- 15:	Fe-evm.model.Fe1.13953	Ft-FtPinG0000462300.01.T01	0
60- 16:	Fe-evm.model.Fe1.13976	Ft-FtPinG0000458100.01.T01	0
60- 17:	Fe-evm.model.Fe1.13986	Ft-FtPinG0000454400.01.T01	0
60- 18:	Fe-evm.model.Fe1.13992	Ft-FtPinG0000451200.01.T01	2e-146
60- 19:	Fe-evm.model.Fe1.14007	Ft-FtPinG0000448000.01.T01	1e-61
60- 20:	Fe-evm.model.Fe1.14009	Ft-FtPinG0000446700.01.T01	2e-141
## Alignment 61: score=761.0 e_value=4e-50 N=18 Fe-GWHBJBK00000001&Ft-Ft5 minus
61- 0:	Fe-evm.model.Fe1.672	Ft-FtPinG0001359200.01.T01	0
61- 1:	Fe-evm.model.Fe1.682	Ft-FtPinG0001358900.01.T01	3e-127
61- 2:	Fe-evm.model.Fe1.707	Ft-FtPinG0001356900.01.T01	0
61- 3:	Fe-evm.model.Fe1.719	Ft-FtPinG0001356400.01.T01	0
61- 4:	Fe-evm.model.Fe1.720	Ft-FtPinG0001355900.01.T01	3e-69
61- 5:	Fe-evm.model.Fe1.722	Ft-FtPinG0001355700.01.T01	5e-26
61- 6:	Fe-evm.model.Fe1.754	Ft-FtPinG0001353700.01.T01	1e-111
61- 7:	Fe-evm.model.Fe1.769	Ft-FtPinG0001353100.01.T01	0
61- 8:	Fe-evm.model.Fe1.773	Ft-FtPinG0001352900.01.T01	4e-65
61- 9:	Fe-evm.model.Fe1.797	Ft-FtPinG0001350900.01.T01	1e-29
61- 10:	Fe-evm.model.Fe1.810	Ft-FtPinG0001347300.01.T01	1e-45
61- 11:	Fe-evm.model.Fe1.821	Ft-FtPinG0001344100.01.T01	2e-86
61- 12:	Fe-evm.model.Fe1.834	Ft-FtPinG0001343800.01.T01	9e-52
61- 13:	Fe-evm.model.Fe1.837	Ft-FtPinG0001342700.01.T01	9e-136
61- 14:	Fe-evm.model.Fe1.854	Ft-FtPinG0001342400.01.T01	0
61- 15:	Fe-evm.model.Fe1.882	Ft-FtPinG0001340500.01.T01	5e-57
61- 16:	Fe-evm.model.Fe1.905	Ft-FtPinG0001337500.01.T01	5e-124
61- 17:	Fe-evm.model.Fe1.907	Ft-FtPinG0001337300.01.T01	0
## Alignment 62: score=448.0 e_value=2.3e-19 N=10 Fe-GWHBJBK00000001&Ft-Ft5 minus
62- 0:	Fe-evm.model.Fe1.315	Ft-FtPinG0004234300.01.T01	0
62- 1:	Fe-evm.model.Fe1.332	Ft-FtPinG0004236400.01.T01	3e-88
62- 2:	Fe-evm.model.Fe1.338	Ft-FtPinG0004239300.01.T01	7e-141
62- 3:	Fe-evm.model.Fe1.340	Ft-FtPinG0004239500.01.T01	4e-35
62- 4:	Fe-evm.model.Fe1.349	Ft-FtPinG0001531600.01.T01	1e-116
62- 5:	Fe-evm.model.Fe1.353	Ft-FtPinG0001532600.01.T01	4e-122
62- 6:	Fe-evm.model.Fe1.355	Ft-FtPinG0006384000.01.T01	2e-141
62- 7:	Fe-evm.model.Fe1.365	Ft-FtPinG0006386000.01.T01	0
62- 8:	Fe-evm.model.Fe1.370	Ft-FtPinG0005659400.01.T01	0
62- 9:	Fe-evm.model.Fe1.380	Ft-FtPinG0005658800.01.T01	0
## Alignment 63: score=422.0 e_value=4.3e-18 N=9 Fe-GWHBJBK00000001&Ft-Ft5 minus
63- 0:	Fe-evm.model.Fe1.14111	Ft-FtPinG0003143000.01.T01	8e-45
63- 1:	Fe-evm.model.Fe1.14116	Ft-FtPinG0004685000.01.T01	8e-19
63- 2:	Fe-evm.model.Fe1.14117	Ft-FtPinG0004684800.01.T01	8e-97
63- 3:	Fe-evm.model.Fe1.14119	Ft-FtPinG0004684100.01.T01	3e-25
63- 4:	Fe-evm.model.Fe1.14120	Ft-FtPinG0004683700.01.T01	5e-147
63- 5:	Fe-evm.model.Fe1.14127	Ft-FtPinG0004681700.01.T01	0
63- 6:	Fe-evm.model.Fe1.14128	Ft-FtPinG0004680500.01.T01	1e-110
63- 7:	Fe-evm.model.Fe1.14130	Ft-FtPinG0004680400.01.T04	3e-85
63- 8:	Fe-evm.model.Fe1.14138	Ft-FtPinG0004679600.01.T01	4e-145
## Alignment 64: score=346.0 e_value=3.5e-22 N=10 Fe-GWHBJBK00000001&Ft-Ft5 minus
64- 0:	Fe-evm.model.Fe1.1020	Ft-FtPinG0001331200.01.T01	0
64- 1:	Fe-evm.model.Fe1.1056	Ft-FtPinG0008958400.01.T01	2e-31
64- 2:	Fe-evm.model.Fe1.1086	Ft-FtPinG0008957900.01.T01	5e-80
64- 3:	Fe-evm.model.Fe1.1087	Ft-FtPinG0008957700.01.T01	1e-49
64- 4:	Fe-evm.model.Fe1.1121	Ft-FtPinG0008956800.01.T01	7e-63
64- 5:	Fe-evm.model.Fe1.1174	Ft-FtPinG0008956300.01.T01	0
64- 6:	Fe-evm.model.Fe1.1220	Ft-FtPinG0009311600.01.T01	0
64- 7:	Fe-evm.model.Fe1.1247	Ft-FtPinG0009308500.01.T01	3e-78
64- 8:	Fe-evm.model.Fe1.1278	Ft-FtPinG0009307900.01.T01	5e-157
64- 9:	Fe-evm.model.Fe1.1314	Ft-FtPinG0003118200.01.T01	4e-163
## Alignment 65: score=289.0 e_value=4.9e-08 N=6 Fe-GWHBJBK00000001&Ft-Ft5 minus
65- 0:	Fe-evm.model.Fe1.2344	Ft-FtPinG0004661600.01.T01	0
65- 1:	Fe-evm.model.Fe1.2354	Ft-FtPinG0004661400.01.T01	4e-91
65- 2:	Fe-evm.model.Fe1.2359	Ft-FtPinG0004661000.01.T01	0
65- 3:	Fe-evm.model.Fe1.2368	Ft-FtPinG0004660700.01.T01	0
65- 4:	Fe-evm.model.Fe1.2379	Ft-FtPinG0004660500.01.T01	2e-147
65- 5:	Fe-evm.model.Fe1.2385	Ft-FtPinG0004660400.01.T01	1e-160
## Alignment 66: score=425.0 e_value=1.1e-16 N=9 Fe-GWHBJBK00000001&Ft-Ft6 plus
66- 0:	Fe-evm.model.Fe1.4808	Ft-FtPinG0008797700.01.T01	0
66- 1:	Fe-evm.model.Fe1.4830	Ft-FtPinG0005671900.01.T01	0
66- 2:	Fe-evm.model.Fe1.4841	Ft-FtPinG0005672300.01.T01	0
66- 3:	Fe-evm.model.Fe1.4852	Ft-FtPinG0005672800.01.T01	0
66- 4:	Fe-evm.model.Fe1.4867	Ft-FtPinG0005673500.01.T01	0
66- 5:	Fe-evm.model.Fe1.4889	Ft-FtPinG0005674600.01.T01	1e-26
66- 6:	Fe-evm.model.Fe1.4899	Ft-FtPinG0005675500.01.T01	0
66- 7:	Fe-evm.model.Fe1.4910	Ft-FtPinG0005676800.01.T01	6e-79
66- 8:	Fe-evm.model.Fe1.4911	Ft-FtPinG0005677000.01.T02	0
## Alignment 67: score=311.0 e_value=2.7e-11 N=7 Fe-GWHBJBK00000001&Ft-Ft6 plus
67- 0:	Fe-evm.model.Fe1.9609	Ft-FtPinG0007571100.01.T01	0
67- 1:	Fe-evm.model.Fe1.9612	Ft-FtPinG0007572400.01.T01	0
67- 2:	Fe-evm.model.Fe1.9639	Ft-FtPinG0007573400.01.T01	1e-82
67- 3:	Fe-evm.model.Fe1.9650	Ft-FtPinG0007575500.01.T01	4e-71
67- 4:	Fe-evm.model.Fe1.9662	Ft-FtPinG0007575900.01.T01	7e-116
67- 5:	Fe-evm.model.Fe1.9691	Ft-FtPinG0007578700.01.T01	0
67- 6:	Fe-evm.model.Fe1.9723	Ft-FtPinG0007579700.01.T01	2e-107
## Alignment 68: score=282.0 e_value=2.5e-09 N=6 Fe-GWHBJBK00000001&Ft-Ft6 plus
68- 0:	Fe-evm.model.Fe1.4026	Ft-FtPinG0002663000.01.T01	0
68- 1:	Fe-evm.model.Fe1.4033	Ft-FtPinG0002664900.01.T01	0
68- 2:	Fe-evm.model.Fe1.4046	Ft-FtPinG0002665300.01.T01	0
68- 3:	Fe-evm.model.Fe1.4064	Ft-FtPinG0002666600.01.T01	3e-96
68- 4:	Fe-evm.model.Fe1.4112	Ft-FtPinG0002666800.01.T01	8e-140
68- 5:	Fe-evm.model.Fe1.4115	Ft-FtPinG0002667100.01.T01	0
## Alignment 69: score=480.0 e_value=1.5e-26 N=11 Fe-GWHBJBK00000001&Ft-Ft6 minus
69- 0:	Fe-evm.model.Fe1.5127	Ft-FtPinG0007261500.01.T01	0
69- 1:	Fe-evm.model.Fe1.5156	Ft-FtPinG0007264800.01.T01	2e-92
69- 2:	Fe-evm.model.Fe1.5202	Ft-FtPinG0006177800.01.T01	0
69- 3:	Fe-evm.model.Fe1.5212	Ft-FtPinG0008587900.01.T01	3e-14
69- 4:	Fe-evm.model.Fe1.5272	Ft-FtPinG0008589100.01.T01	0
69- 5:	Fe-evm.model.Fe1.5328	Ft-FtPinG0004485800.01.T01	2e-41
69- 6:	Fe-evm.model.Fe1.5329	Ft-FtPinG0004486000.01.T01	6e-60
69- 7:	Fe-evm.model.Fe1.5358	Ft-FtPinG0004486600.01.T01	2e-57
69- 8:	Fe-evm.model.Fe1.5363	Ft-FtPinG0004487400.01.T01	2e-97
69- 9:	Fe-evm.model.Fe1.5395	Ft-FtPinG0004489000.01.T01	0
69- 10:	Fe-evm.model.Fe1.5452	Ft-FtPinG0008928700.01.T01	4e-57
## Alignment 70: score=402.0 e_value=1.6e-20 N=9 Fe-GWHBJBK00000001&Ft-Ft6 minus
70- 0:	Fe-evm.model.Fe1.6396	Ft-FtPinG0005904100.01.T01	2e-19
70- 1:	Fe-evm.model.Fe1.6424	Ft-FtPinG0005903700.01.T01	2e-47
70- 2:	Fe-evm.model.Fe1.6521	Ft-FtPinG0005900400.01.T01	5e-66
70- 3:	Fe-evm.model.Fe1.6587	Ft-FtPinG0008778900.01.T01	0
70- 4:	Fe-evm.model.Fe1.6595	Ft-FtPinG0009384200.01.T01	0
70- 5:	Fe-evm.model.Fe1.6616	Ft-FtPinG0009385100.01.T01	8e-29
70- 6:	Fe-evm.model.Fe1.6620	Ft-FtPinG0009385300.01.T01	0
70- 7:	Fe-evm.model.Fe1.6630	Ft-FtPinG0009385500.01.T01	3e-20
70- 8:	Fe-evm.model.Fe1.6631	Ft-FtPinG0009386100.01.T01	3e-90
## Alignment 71: score=542.0 e_value=3.4e-24 N=11 Fe-GWHBJBK00000001&Ft-Ft8 plus
71- 0:	Fe-evm.model.Fe1.960	Ft-FtPinG0003341500.01.T01	0
71- 1:	Fe-evm.model.Fe1.969	Ft-FtPinG0003342100.01.T01	1e-121
71- 2:	Fe-evm.model.Fe1.970	Ft-FtPinG0003342300.01.T01	0
71- 3:	Fe-evm.model.Fe1.971	Ft-FtPinG0003342500.01.T01	3e-98
71- 4:	Fe-evm.model.Fe1.972	Ft-FtPinG0003343100.01.T01	0
71- 5:	Fe-evm.model.Fe1.973	Ft-FtPinG0003343400.01.T01	0
71- 6:	Fe-evm.model.Fe1.978	Ft-FtPinG0003343700.01.T01	0
71- 7:	Fe-evm.model.Fe1.979	Ft-FtPinG0003344000.01.T01	0
71- 8:	Fe-evm.model.Fe1.983	Ft-FtPinG0003344300.01.T01	3e-145
71- 9:	Fe-evm.model.Fe1.988	Ft-FtPinG0003345100.01.T01	6e-164
71- 10:	Fe-evm.model.Fe1.989	Ft-FtPinG0003345300.01.T01	0
## Alignment 72: score=405.0 e_value=5.3e-16 N=9 Fe-GWHBJBK00000001&Ft-Ft8 plus
72- 0:	Fe-evm.model.Fe1.14602	Ft-FtPinG0003332200.01.T01	0
72- 1:	Fe-evm.model.Fe1.14604	Ft-FtPinG0003333400.01.T01	2e-95
72- 2:	Fe-evm.model.Fe1.14610	Ft-FtPinG0003336400.01.T01	1e-59
72- 3:	Fe-evm.model.Fe1.14614	Ft-FtPinG0003337500.01.T01	0
72- 4:	Fe-evm.model.Fe1.14616	Ft-FtPinG0003339300.01.T01	0
72- 5:	Fe-evm.model.Fe1.14621	Ft-FtPinG0003341500.01.T01	0
72- 6:	Fe-evm.model.Fe1.14631	Ft-FtPinG0003343400.01.T01	0
72- 7:	Fe-evm.model.Fe1.14635	Ft-FtPinG0003345100.01.T01	3e-101
72- 8:	Fe-evm.model.Fe1.14637	Ft-FtPinG0003345600.01.T01	3e-60
## Alignment 73: score=325.0 e_value=5.3e-11 N=7 Fe-GWHBJBK00000001&Ft-Ft8 plus
73- 0:	Fe-evm.model.Fe1.14298	Ft-FtPinG0009395900.01.T01	1e-42
73- 1:	Fe-evm.model.Fe1.14303	Ft-FtPinG0004799800.01.T01	5e-153
73- 2:	Fe-evm.model.Fe1.14305	Ft-FtPinG0004799500.01.T01	0
73- 3:	Fe-evm.model.Fe1.14319	Ft-FtPinG0004797700.01.T01	1e-51
73- 4:	Fe-evm.model.Fe1.14324	Ft-FtPinG0004797500.01.T01	3e-158
73- 5:	Fe-evm.model.Fe1.14327	Ft-FtPinG0004797000.01.T02	8e-86
73- 6:	Fe-evm.model.Fe1.14329	Ft-FtPinG0004795100.01.T01	3e-72
## Alignment 74: score=318.0 e_value=5e-15 N=7 Fe-GWHBJBK00000001&Ft-Ft8 plus
74- 0:	Fe-evm.model.Fe1.14506	Ft-FtPinG0009368900.01.T01	1e-144
74- 1:	Fe-evm.model.Fe1.14518	Ft-FtPinG0009367800.01.T01	9e-49
74- 2:	Fe-evm.model.Fe1.14519	Ft-FtPinG0009367500.01.T01	6e-50
74- 3:	Fe-evm.model.Fe1.14524	Ft-FtPinG0009366900.01.T02	3e-31
74- 4:	Fe-evm.model.Fe1.14525	Ft-FtPinG0009366500.01.T01	3e-165
74- 5:	Fe-evm.model.Fe1.14537	Ft-FtPinG0009362800.01.T01	0
74- 6:	Fe-evm.model.Fe1.14539	Ft-FtPinG0009362500.01.T01	2e-15
## Alignment 75: score=294.0 e_value=1.6e-11 N=7 Fe-GWHBJBK00000001&Ft-Ft8 plus
75- 0:	Fe-evm.model.Fe1.14566	Ft-FtPinG0003294600.01.T01	1e-77
75- 1:	Fe-evm.model.Fe1.14579	Ft-FtPinG0003300400.01.T02	6e-48
75- 2:	Fe-evm.model.Fe1.14580	Ft-FtPinG0003304400.01.T01	1e-59
75- 3:	Fe-evm.model.Fe1.14590	Ft-FtPinG0003305100.01.T02	0
75- 4:	Fe-evm.model.Fe1.14594	Ft-FtPinG0003307100.01.T01	3e-32
75- 5:	Fe-evm.model.Fe1.14596	Ft-FtPinG0003310600.01.T01	8e-159
75- 6:	Fe-evm.model.Fe1.14599	Ft-FtPinG0003314200.01.T01	0
## Alignment 76: score=263.0 e_value=2.4e-08 N=6 Fe-GWHBJBK00000001&Ft-Ft8 plus
76- 0:	Fe-evm.model.Fe1.5326	Ft-FtPinG0006373800.01.T01	2e-107
76- 1:	Fe-evm.model.Fe1.5358	Ft-FtPinG0006374200.01.T01	2e-52
76- 2:	Fe-evm.model.Fe1.5363	Ft-FtPinG0006375800.01.T01	3e-109
76- 3:	Fe-evm.model.Fe1.5401	Ft-FtPinG0006376100.01.T01	0
76- 4:	Fe-evm.model.Fe1.5438	Ft-FtPinG0006379100.01.T01	0
76- 5:	Fe-evm.model.Fe1.5477	Ft-FtPinG0006379900.01.T01	9e-51
## Alignment 77: score=341.0 e_value=1.2e-11 N=7 Fe-GWHBJBK00000001&Ft-Ft8 minus
77- 0:	Fe-evm.model.Fe1.949	Ft-FtPinG0003343700.01.T01	0
77- 1:	Fe-evm.model.Fe1.952	Ft-FtPinG0003343400.01.T01	0
77- 2:	Fe-evm.model.Fe1.953	Ft-FtPinG0003343100.01.T01	0
77- 3:	Fe-evm.model.Fe1.957	Ft-FtPinG0003342500.01.T01	2e-96
77- 4:	Fe-evm.model.Fe1.958	Ft-FtPinG0003342100.01.T01	1e-149
77- 5:	Fe-evm.model.Fe1.959	Ft-FtPinG0003341800.01.T01	4e-134
77- 6:	Fe-evm.model.Fe1.964	Ft-FtPinG0003340400.01.T01	0
## Alignment 78: score=288.0 e_value=8.5e-12 N=7 Fe-GWHBJBK00000001&Ft-Ft8 minus
78- 0:	Fe-evm.model.Fe1.4046	Ft-FtPinG0007374600.01.T01	6e-170
78- 1:	Fe-evm.model.Fe1.4142	Ft-FtPinG0007904000.01.T01	0
78- 2:	Fe-evm.model.Fe1.4195	Ft-FtPinG0006639500.01.T01	1e-42
78- 3:	Fe-evm.model.Fe1.4315	Ft-FtPinG0006641700.01.T01	0
78- 4:	Fe-evm.model.Fe1.4351	Ft-FtPinG0007652500.01.T01	1e-98
78- 5:	Fe-evm.model.Fe1.4391	Ft-FtPinG0004722600.01.T01	2e-144
78- 6:	Fe-evm.model.Fe1.4395	Ft-FtPinG0004723000.01.T01	6e-57
## Alignment 79: score=7038.0 e_value=0 N=147 Fe-GWHBJBK00000002&Ft-Ft1 plus
79- 0:	Fe-evm.model.Fe2.2166	Ft-FtPinG0009188500.01.T01	1e-45
79- 1:	Fe-evm.model.Fe2.2277	Ft-FtPinG0005098500.01.T01	0
79- 2:	Fe-evm.model.Fe2.2278	Ft-FtPinG0005098800.01.T01	0
79- 3:	Fe-evm.model.Fe2.2281	Ft-FtPinG0005099300.01.T01	2e-132
79- 4:	Fe-evm.model.Fe2.2286	Ft-FtPinG0005099900.01.T01	3e-50
79- 5:	Fe-evm.model.Fe2.2287	Ft-FtPinG0005100800.01.T01	0
79- 6:	Fe-evm.model.Fe2.2305	Ft-FtPinG0005100900.01.T01	9e-176
79- 7:	Fe-evm.model.Fe2.2307	Ft-FtPinG0005101100.01.T01	0
79- 8:	Fe-evm.model.Fe2.2308	Ft-FtPinG0005101400.01.T02	0
79- 9:	Fe-evm.model.Fe2.2309	Ft-FtPinG0005101800.01.T01	0
79- 10:	Fe-evm.model.Fe2.2312	Ft-FtPinG0005101900.01.T01	0
79- 11:	Fe-evm.model.Fe2.2320	Ft-FtPinG0005102500.01.T01	0
79- 12:	Fe-evm.model.Fe2.2321	Ft-FtPinG0005102700.01.T01	1e-168
79- 13:	Fe-evm.model.Fe2.2334	Ft-FtPinG0004690000.01.T01	0
79- 14:	Fe-evm.model.Fe2.2342	Ft-FtPinG0004690300.01.T01	4e-138
79- 15:	Fe-evm.model.Fe2.2345	Ft-FtPinG0004690700.01.T01	2e-56
79- 16:	Fe-evm.model.Fe2.2359	Ft-FtPinG0009378800.01.T01	0
79- 17:	Fe-evm.model.Fe2.2361	Ft-FtPinG0009378400.01.T01	2e-106
79- 18:	Fe-evm.model.Fe2.2362	Ft-FtPinG0009378100.01.T01	0
79- 19:	Fe-evm.model.Fe2.2363	Ft-FtPinG0009377900.01.T01	0
79- 20:	Fe-evm.model.Fe2.2364	Ft-FtPinG0009377500.01.T01	0
79- 21:	Fe-evm.model.Fe2.2366	Ft-FtPinG0009377300.01.T01	3e-97
79- 22:	Fe-evm.model.Fe2.2374	Ft-FtPinG0009377000.01.T01	6e-106
79- 23:	Fe-evm.model.Fe2.2375	Ft-FtPinG0009376700.01.T01	3e-65
79- 24:	Fe-evm.model.Fe2.2422	Ft-FtPinG0009376500.01.T01	4e-72
79- 25:	Fe-evm.model.Fe2.2423	Ft-FtPinG0009376100.01.T02	0
79- 26:	Fe-evm.model.Fe2.2425	Ft-FtPinG0009375900.01.T01	0
79- 27:	Fe-evm.model.Fe2.2431	Ft-FtPinG0009375700.01.T01	0
79- 28:	Fe-evm.model.Fe2.2443	Ft-FtPinG0009375500.01.T01	0
79- 29:	Fe-evm.model.Fe2.2449	Ft-FtPinG0009375400.01.T01	0
79- 30:	Fe-evm.model.Fe2.2467	Ft-FtPinG0009375200.01.T01	6e-87
79- 31:	Fe-evm.model.Fe2.2468	Ft-FtPinG0009374500.01.T01	0
79- 32:	Fe-evm.model.Fe2.2470	Ft-FtPinG0009374300.01.T01	3e-88
79- 33:	Fe-evm.model.Fe2.2472	Ft-FtPinG0009374100.01.T01	0
79- 34:	Fe-evm.model.Fe2.2473	Ft-FtPinG0009374000.01.T01	0
79- 35:	Fe-evm.model.Fe2.2474	Ft-FtPinG0009373700.01.T01	0
79- 36:	Fe-evm.model.Fe2.2475	Ft-FtPinG0009373500.01.T01	0
79- 37:	Fe-evm.model.Fe2.2480	Ft-FtPinG0009373100.01.T01	0
79- 38:	Fe-evm.model.Fe2.2481	Ft-FtPinG0009372900.01.T01	0
79- 39:	Fe-evm.model.Fe2.2498	Ft-FtPinG0009372500.01.T01	1e-113
79- 40:	Fe-evm.model.Fe2.2506	Ft-FtPinG0009372200.01.T01	1e-98
79- 41:	Fe-evm.model.Fe2.2508	Ft-FtPinG0009371700.01.T01	0
79- 42:	Fe-evm.model.Fe2.2510	Ft-FtPinG0009371500.01.T01	0
79- 43:	Fe-evm.model.Fe2.2513	Ft-FtPinG0009371400.01.T01	4e-129
79- 44:	Fe-evm.model.Fe2.2520	Ft-FtPinG0009371100.01.T01	5e-56
79- 45:	Fe-evm.model.Fe2.2525	Ft-FtPinG0001915700.01.T01	0
79- 46:	Fe-evm.model.Fe2.2526	Ft-FtPinG0001916000.01.T01	0
79- 47:	Fe-evm.model.Fe2.2553	Ft-FtPinG0001916700.01.T01	7e-55
79- 48:	Fe-evm.model.Fe2.2589	Ft-FtPinG0001917100.01.T01	6e-29
79- 49:	Fe-evm.model.Fe2.2609	Ft-FtPinG0001917900.01.T01	8e-56
79- 50:	Fe-evm.model.Fe2.2622	Ft-FtPinG0001918200.01.T01	0
79- 51:	Fe-evm.model.Fe2.2630	Ft-FtPinG0001918300.01.T01	0
79- 52:	Fe-evm.model.Fe2.2631	Ft-FtPinG0001919300.01.T01	1e-178
79- 53:	Fe-evm.model.Fe2.2633	Ft-FtPinG0001919700.01.T01	0
79- 54:	Fe-evm.model.Fe2.2635	Ft-FtPinG0001920200.01.T01	6e-64
79- 55:	Fe-evm.model.Fe2.2646	Ft-FtPinG0001920800.01.T01	5e-26
79- 56:	Fe-evm.model.Fe2.2668	Ft-FtPinG0001921200.01.T01	3e-132
79- 57:	Fe-evm.model.Fe2.2690	Ft-FtPinG0001922700.01.T01	8e-93
79- 58:	Fe-evm.model.Fe2.2705	Ft-FtPinG0001923900.01.T01	0
79- 59:	Fe-evm.model.Fe2.2710	Ft-FtPinG0001924400.01.T01	0
79- 60:	Fe-evm.model.Fe2.2717	Ft-FtPinG0001924500.01.T01	0
79- 61:	Fe-evm.model.Fe2.2745	Ft-FtPinG0001928000.01.T01	0
79- 62:	Fe-evm.model.Fe2.2755	Ft-FtPinG0007833500.01.T01	5e-137
79- 63:	Fe-evm.model.Fe2.2756	Ft-FtPinG0007833100.01.T01	4e-99
79- 64:	Fe-evm.model.Fe2.2764	Ft-FtPinG0007832400.01.T01	9e-64
79- 65:	Fe-evm.model.Fe2.2770	Ft-FtPinG0007832000.01.T02	0
79- 66:	Fe-evm.model.Fe2.2778	Ft-FtPinG0007831800.01.T01	0
79- 67:	Fe-evm.model.Fe2.2779	Ft-FtPinG0007831100.01.T01	2e-113
79- 68:	Fe-evm.model.Fe2.2786	Ft-FtPinG0007830100.01.T01	0
79- 69:	Fe-evm.model.Fe2.2790	Ft-FtPinG0006405800.01.T01	6e-76
79- 70:	Fe-evm.model.Fe2.2801	Ft-FtPinG0006405200.01.T01	0
79- 71:	Fe-evm.model.Fe2.2820	Ft-FtPinG0003576400.01.T01	0
79- 72:	Fe-evm.model.Fe2.2843	Ft-FtPinG0003576200.01.T01	0
79- 73:	Fe-evm.model.Fe2.2847	Ft-FtPinG0003576000.01.T01	7e-173
79- 74:	Fe-evm.model.Fe2.2863	Ft-FtPinG0003575600.01.T01	0
79- 75:	Fe-evm.model.Fe2.2864	Ft-FtPinG0003575000.01.T01	4e-59
79- 76:	Fe-evm.model.Fe2.2869	Ft-FtPinG0003574800.01.T02	0
79- 77:	Fe-evm.model.Fe2.2870	Ft-FtPinG0003574500.01.T01	0
79- 78:	Fe-evm.model.Fe2.2872	Ft-FtPinG0003574300.01.T01	0
79- 79:	Fe-evm.model.Fe2.2888	Ft-FtPinG0003573500.01.T01	0
79- 80:	Fe-evm.model.Fe2.2892	Ft-FtPinG0003573400.01.T01	1e-161
79- 81:	Fe-evm.model.Fe2.2893	Ft-FtPinG0003573100.01.T01	0
79- 82:	Fe-evm.model.Fe2.2909	Ft-FtPinG0003572800.01.T01	0
79- 83:	Fe-evm.model.Fe2.2910	Ft-FtPinG0003572500.01.T01	0
79- 84:	Fe-evm.model.Fe2.2914	Ft-FtPinG0003572300.01.T01	0
79- 85:	Fe-evm.model.Fe2.2917	Ft-FtPinG0003572200.01.T01	4e-123
79- 86:	Fe-evm.model.Fe2.2920	Ft-FtPinG0003572000.01.T01	5e-108
79- 87:	Fe-evm.model.Fe2.2921	Ft-FtPinG0003571700.01.T01	2e-105
79- 88:	Fe-evm.model.Fe2.2926	Ft-FtPinG0003571600.01.T01	0
79- 89:	Fe-evm.model.Fe2.2952	Ft-FtPinG0003571000.01.T01	0
79- 90:	Fe-evm.model.Fe2.2995	Ft-FtPinG0003570500.01.T01	1e-18
79- 91:	Fe-evm.model.Fe2.3021	Ft-FtPinG0003568100.01.T01	7e-63
79- 92:	Fe-evm.model.Fe2.3038	Ft-FtPinG0003567900.01.T01	2e-164
79- 93:	Fe-evm.model.Fe2.3079	Ft-FtPinG0003567500.01.T01	2e-70
79- 94:	Fe-evm.model.Fe2.3100	Ft-FtPinG0003566500.01.T01	2e-67
79- 95:	Fe-evm.model.Fe2.3128	Ft-FtPinG0003562000.01.T01	7e-17
79- 96:	Fe-evm.model.Fe2.3159	Ft-FtPinG0003561800.01.T01	2e-142
79- 97:	Fe-evm.model.Fe2.3170	Ft-FtPinG0003560300.01.T01	0
79- 98:	Fe-evm.model.Fe2.3174	Ft-FtPinG0003560200.01.T01	1e-126
79- 99:	Fe-evm.model.Fe2.3176	Ft-FtPinG0003559900.01.T01	0
79-100:	Fe-evm.model.Fe2.3186	Ft-FtPinG0003559600.01.T01	0
79-101:	Fe-evm.model.Fe2.3187	Ft-FtPinG0003559300.01.T01	3e-178
79-102:	Fe-evm.model.Fe2.3199	Ft-FtPinG0003559000.01.T01	0
79-103:	Fe-evm.model.Fe2.3209	Ft-FtPinG0003558600.01.T01	3e-94
79-104:	Fe-evm.model.Fe2.3227	Ft-FtPinG0003557600.01.T01	0
79-105:	Fe-evm.model.Fe2.3228	Ft-FtPinG0003557200.01.T01	9e-70
79-106:	Fe-evm.model.Fe2.3231	Ft-FtPinG0003557000.01.T01	0
79-107:	Fe-evm.model.Fe2.3233	Ft-FtPinG0003556700.01.T01	4e-131
79-108:	Fe-evm.model.Fe2.3245	Ft-FtPinG0003556500.01.T01	0
79-109:	Fe-evm.model.Fe2.3252	Ft-FtPinG0003556000.01.T01	0
79-110:	Fe-evm.model.Fe2.3253	Ft-FtPinG0003555800.01.T01	2e-106
79-111:	Fe-evm.model.Fe2.3260	Ft-FtPinG0003555400.01.T01	0
79-112:	Fe-evm.model.Fe2.3261	Ft-FtPinG0003555100.01.T01	0
79-113:	Fe-evm.model.Fe2.3262	Ft-FtPinG0003555000.01.T01	1e-128
79-114:	Fe-evm.model.Fe2.3539	Ft-FtPinG0003554700.01.T01	0
79-115:	Fe-evm.model.Fe2.3542	Ft-FtPinG0003554500.01.T01	3e-127
79-116:	Fe-evm.model.Fe2.3592	Ft-FtPinG0003553900.01.T01	6e-94
79-117:	Fe-evm.model.Fe2.3597	Ft-FtPinG0003553500.01.T02	0
79-118:	Fe-evm.model.Fe2.3611	Ft-FtPinG0003553100.01.T01	0
79-119:	Fe-evm.model.Fe2.3657	Ft-FtPinG0003548600.01.T01	1e-130
79-120:	Fe-evm.model.Fe2.3660	Ft-FtPinG0003548000.01.T01	8e-179
79-121:	Fe-evm.model.Fe2.3661	Ft-FtPinG0003547700.01.T01	0
79-122:	Fe-evm.model.Fe2.3666	Ft-FtPinG0004972400.01.T02	0
79-123:	Fe-evm.model.Fe2.3667	Ft-FtPinG0004973000.01.T01	2e-51
79-124:	Fe-evm.model.Fe2.3680	Ft-FtPinG0004974600.01.T01	1e-28
79-125:	Fe-evm.model.Fe2.3710	Ft-FtPinG0004975200.01.T01	4e-149
79-126:	Fe-evm.model.Fe2.3719	Ft-FtPinG0004975600.01.T01	2e-154
79-127:	Fe-evm.model.Fe2.3726	Ft-FtPinG0004975800.01.T01	0
79-128:	Fe-evm.model.Fe2.3727	Ft-FtPinG0004976200.01.T01	3e-147
79-129:	Fe-evm.model.Fe2.3729	Ft-FtPinG0004976300.01.T01	7e-130
79-130:	Fe-evm.model.Fe2.3732	Ft-FtPinG0004976600.01.T01	3e-91
79-131:	Fe-evm.model.Fe2.3736	Ft-FtPinG0000367200.01.T01	9e-79
79-132:	Fe-evm.model.Fe2.3742	Ft-FtPinG0000367500.01.T01	0
79-133:	Fe-evm.model.Fe2.3754	Ft-FtPinG0000371500.01.T01	0
79-134:	Fe-evm.model.Fe2.3770	Ft-FtPinG0000372000.01.T01	6e-60
79-135:	Fe-evm.model.Fe2.3838	Ft-FtPinG0000372700.01.T01	2e-118
79-136:	Fe-evm.model.Fe2.3839	Ft-FtPinG0000373000.01.T01	0
79-137:	Fe-evm.model.Fe2.3840	Ft-FtPinG0000373600.01.T01	0
79-138:	Fe-evm.model.Fe2.3848	Ft-FtPinG0000374000.01.T01	0
79-139:	Fe-evm.model.Fe2.3853	Ft-FtPinG0000374400.01.T01	0
79-140:	Fe-evm.model.Fe2.3854	Ft-FtPinG0000374600.01.T01	0
79-141:	Fe-evm.model.Fe2.3862	Ft-FtPinG0000374900.01.T01	5e-143
79-142:	Fe-evm.model.Fe2.3863	Ft-FtPinG0000375200.01.T01	0
79-143:	Fe-evm.model.Fe2.3864	Ft-FtPinG0000375400.01.T01	0
79-144:	Fe-evm.model.Fe2.3870	Ft-FtPinG0000375700.01.T01	8e-112
79-145:	Fe-evm.model.Fe2.3873	Ft-FtPinG0000375900.01.T01	0
79-146:	Fe-evm.model.Fe2.3900	Ft-FtPinG0000376200.01.T01	0
## Alignment 80: score=4613.0 e_value=0 N=94 Fe-GWHBJBK00000002&Ft-Ft1 plus
80- 0:	Fe-evm.model.Fe2.19	Ft-FtPinG0003260900.01.T01	0
80- 1:	Fe-evm.model.Fe2.20	Ft-FtPinG0003261200.01.T01	0
80- 2:	Fe-evm.model.Fe2.21	Ft-FtPinG0003261400.01.T02	5e-107
80- 3:	Fe-evm.model.Fe2.22	Ft-FtPinG0003261600.01.T01	6e-81
80- 4:	Fe-evm.model.Fe2.27	Ft-FtPinG0003261900.01.T01	0
80- 5:	Fe-evm.model.Fe2.28	Ft-FtPinG0003262100.01.T01	0
80- 6:	Fe-evm.model.Fe2.30	Ft-FtPinG0003262600.01.T01	5e-134
80- 7:	Fe-evm.model.Fe2.34	Ft-FtPinG0003263200.01.T01	0
80- 8:	Fe-evm.model.Fe2.36	Ft-FtPinG0003263300.01.T01	0
80- 9:	Fe-evm.model.Fe2.38	Ft-FtPinG0008389600.01.T01	4e-167
80- 10:	Fe-evm.model.Fe2.39	Ft-FtPinG0008389300.01.T01	8e-175
80- 11:	Fe-evm.model.Fe2.45	Ft-FtPinG0004160600.01.T01	9e-124
80- 12:	Fe-evm.model.Fe2.46	Ft-FtPinG0004160800.01.T01	0
80- 13:	Fe-evm.model.Fe2.47	Ft-FtPinG0004161000.01.T02	0
80- 14:	Fe-evm.model.Fe2.53	Ft-FtPinG0004161500.01.T01	0
80- 15:	Fe-evm.model.Fe2.54	Ft-FtPinG0004162000.01.T01	3e-153
80- 16:	Fe-evm.model.Fe2.55	Ft-FtPinG0004162500.01.T01	0
80- 17:	Fe-evm.model.Fe2.57	Ft-FtPinG0004163100.01.T01	0
80- 18:	Fe-evm.model.Fe2.58	Ft-FtPinG0004163500.01.T01	0
80- 19:	Fe-evm.model.Fe2.62	Ft-FtPinG0004163700.01.T01	5e-154
80- 20:	Fe-evm.model.Fe2.63	Ft-FtPinG0004164000.01.T01	1e-99
80- 21:	Fe-evm.model.Fe2.65	Ft-FtPinG0004164300.01.T01	6e-77
80- 22:	Fe-evm.model.Fe2.66	Ft-FtPinG0004164700.01.T01	2e-90
80- 23:	Fe-evm.model.Fe2.67	Ft-FtPinG0004165600.01.T01	0
80- 24:	Fe-evm.model.Fe2.70	Ft-FtPinG0007419000.01.T01	0
80- 25:	Fe-evm.model.Fe2.71	Ft-FtPinG0007418400.01.T01	1e-169
80- 26:	Fe-evm.model.Fe2.76	Ft-FtPinG0007417800.01.T01	0
80- 27:	Fe-evm.model.Fe2.78	Ft-FtPinG0008479800.01.T01	1e-119
80- 28:	Fe-evm.model.Fe2.82	Ft-FtPinG0008479400.01.T01	0
80- 29:	Fe-evm.model.Fe2.83	Ft-FtPinG0008479100.01.T01	5e-118
80- 30:	Fe-evm.model.Fe2.84	Ft-FtPinG0008478700.01.T01	6e-165
80- 31:	Fe-evm.model.Fe2.86	Ft-FtPinG0008478600.01.T02	7e-60
80- 32:	Fe-evm.model.Fe2.88	Ft-FtPinG0008478400.01.T01	0
80- 33:	Fe-evm.model.Fe2.89	Ft-FtPinG0008478000.01.T01	0
80- 34:	Fe-evm.model.Fe2.90	Ft-FtPinG0008477200.01.T01	0
80- 35:	Fe-evm.model.Fe2.91	Ft-FtPinG0008476700.01.T01	0
80- 36:	Fe-evm.model.Fe2.93	Ft-FtPinG0008476500.01.T01	0
80- 37:	Fe-evm.model.Fe2.94	Ft-FtPinG0008476000.01.T01	2e-134
80- 38:	Fe-evm.model.Fe2.100	Ft-FtPinG0008475000.01.T01	0
80- 39:	Fe-evm.model.Fe2.101	Ft-FtPinG0008474600.01.T01	1e-119
80- 40:	Fe-evm.model.Fe2.102	Ft-FtPinG0006506800.01.T01	5e-129
80- 41:	Fe-evm.model.Fe2.103	Ft-FtPinG0006506400.01.T01	0
80- 42:	Fe-evm.model.Fe2.109	Ft-FtPinG0006505200.01.T01	0
80- 43:	Fe-evm.model.Fe2.110	Ft-FtPinG0006505000.01.T01	0
80- 44:	Fe-evm.model.Fe2.113	Ft-FtPinG0006504400.01.T01	0
80- 45:	Fe-evm.model.Fe2.114	Ft-FtPinG0006504100.01.T01	4e-176
80- 46:	Fe-evm.model.Fe2.116	Ft-FtPinG0006503800.01.T01	5e-139
80- 47:	Fe-evm.model.Fe2.117	Ft-FtPinG0003419000.01.T01	4e-55
80- 48:	Fe-evm.model.Fe2.119	Ft-FtPinG0007838600.01.T01	0
80- 49:	Fe-evm.model.Fe2.120	Ft-FtPinG0007838300.01.T01	0
80- 50:	Fe-evm.model.Fe2.121	Ft-FtPinG0007838100.01.T01	0
80- 51:	Fe-evm.model.Fe2.125	Ft-FtPinG0007837900.01.T01	0
80- 52:	Fe-evm.model.Fe2.129	Ft-FtPinG0007837800.01.T01	0
80- 53:	Fe-evm.model.Fe2.130	Ft-FtPinG0008415000.01.T01	9e-41
80- 54:	Fe-evm.model.Fe2.131	Ft-FtPinG0008414800.01.T01	0
80- 55:	Fe-evm.model.Fe2.132	Ft-FtPinG0008414100.01.T01	1e-42
80- 56:	Fe-evm.model.Fe2.136	Ft-FtPinG0008412100.01.T01	0
80- 57:	Fe-evm.model.Fe2.141	Ft-FtPinG0008411900.01.T01	9e-59
80- 58:	Fe-evm.model.Fe2.142	Ft-FtPinG0008411800.01.T01	1e-146
80- 59:	Fe-evm.model.Fe2.144	Ft-FtPinG0008410600.01.T01	0
80- 60:	Fe-evm.model.Fe2.145	Ft-FtPinG0008410300.01.T01	3e-127
80- 61:	Fe-evm.model.Fe2.147	Ft-FtPinG0008410200.01.T01	0
80- 62:	Fe-evm.model.Fe2.148	Ft-FtPinG0008409000.01.T01	0
80- 63:	Fe-evm.model.Fe2.150	Ft-FtPinG0008408800.01.T01	0
80- 64:	Fe-evm.model.Fe2.151	Ft-FtPinG0008408600.01.T01	0
80- 65:	Fe-evm.model.Fe2.152	Ft-FtPinG0008408300.01.T01	0
80- 66:	Fe-evm.model.Fe2.154	Ft-FtPinG0008408200.01.T01	0
80- 67:	Fe-evm.model.Fe2.156	Ft-FtPinG0008407900.01.T01	0
80- 68:	Fe-evm.model.Fe2.157	Ft-FtPinG0008407800.01.T01	4e-55
80- 69:	Fe-evm.model.Fe2.158	Ft-FtPinG0008406900.01.T01	0
80- 70:	Fe-evm.model.Fe2.160	Ft-FtPinG0008406500.01.T01	0
80- 71:	Fe-evm.model.Fe2.163	Ft-FtPinG0000434500.01.T01	1e-75
80- 72:	Fe-evm.model.Fe2.164	Ft-FtPinG0000434100.01.T01	0
80- 73:	Fe-evm.model.Fe2.167	Ft-FtPinG0000434000.01.T01	0
80- 74:	Fe-evm.model.Fe2.168	Ft-FtPinG0007149200.01.T01	2e-35
80- 75:	Fe-evm.model.Fe2.169	Ft-FtPinG0007148500.01.T01	0
80- 76:	Fe-evm.model.Fe2.172	Ft-FtPinG0007148300.01.T01	0
80- 77:	Fe-evm.model.Fe2.176	Ft-FtPinG0007148200.01.T01	1e-170
80- 78:	Fe-evm.model.Fe2.178	Ft-FtPinG0007147800.01.T01	0
80- 79:	Fe-evm.model.Fe2.179	Ft-FtPinG0007147500.01.T01	0
80- 80:	Fe-evm.model.Fe2.188	Ft-FtPinG0007147100.01.T01	0
80- 81:	Fe-evm.model.Fe2.219	Ft-FtPinG0007951400.01.T01	0
80- 82:	Fe-evm.model.Fe2.220	Ft-FtPinG0007951100.01.T01	0
80- 83:	Fe-evm.model.Fe2.223	Ft-FtPinG0000364200.01.T01	0
80- 84:	Fe-evm.model.Fe2.225	Ft-FtPinG0000364600.01.T01	0
80- 85:	Fe-evm.model.Fe2.226	Ft-FtPinG0000364900.01.T01	7e-115
80- 86:	Fe-evm.model.Fe2.231	Ft-FtPinG0000365800.01.T01	4e-90
80- 87:	Fe-evm.model.Fe2.236	Ft-FtPinG0005501700.01.T01	0
80- 88:	Fe-evm.model.Fe2.242	Ft-FtPinG0008390000.01.T01	0
80- 89:	Fe-evm.model.Fe2.247	Ft-FtPinG0008390400.01.T01	0
80- 90:	Fe-evm.model.Fe2.249	Ft-FtPinG0008390800.01.T01	9e-40
80- 91:	Fe-evm.model.Fe2.250	Ft-FtPinG0008390900.01.T01	0
80- 92:	Fe-evm.model.Fe2.257	Ft-FtPinG0008391800.01.T01	0
80- 93:	Fe-evm.model.Fe2.261	Ft-FtPinG0008392000.01.T01	0
## Alignment 81: score=1975.0 e_value=8e-138 N=40 Fe-GWHBJBK00000002&Ft-Ft1 plus
81- 0:	Fe-evm.model.Fe2.14137	Ft-FtPinG0001038800.01.T01	0
81- 1:	Fe-evm.model.Fe2.14139	Ft-FtPinG0001039100.01.T01	0
81- 2:	Fe-evm.model.Fe2.14142	Ft-FtPinG0001040500.01.T01	2e-126
81- 3:	Fe-evm.model.Fe2.14145	Ft-FtPinG0001040700.01.T01	1e-52
81- 4:	Fe-evm.model.Fe2.14146	Ft-FtPinG0001041400.01.T01	4e-67
81- 5:	Fe-evm.model.Fe2.14148	Ft-FtPinG0001880400.01.T01	0
81- 6:	Fe-evm.model.Fe2.14150	Ft-FtPinG0001879900.01.T01	0
81- 7:	Fe-evm.model.Fe2.14152	Ft-FtPinG0001879700.01.T01	0
81- 8:	Fe-evm.model.Fe2.14153	Ft-FtPinG0001879600.01.T01	2e-93
81- 9:	Fe-evm.model.Fe2.14155	Ft-FtPinG0001878800.01.T01	3e-46
81- 10:	Fe-evm.model.Fe2.14156	Ft-FtPinG0001878500.01.T01	2e-171
81- 11:	Fe-evm.model.Fe2.14157	Ft-FtPinG0001878400.01.T01	0
81- 12:	Fe-evm.model.Fe2.14158	Ft-FtPinG0001878200.01.T01	0
81- 13:	Fe-evm.model.Fe2.14159	Ft-FtPinG0001878000.01.T01	4e-148
81- 14:	Fe-evm.model.Fe2.14160	Ft-FtPinG0001877700.01.T01	0
81- 15:	Fe-evm.model.Fe2.14161	Ft-FtPinG0001877600.01.T01	0
81- 16:	Fe-evm.model.Fe2.14162	Ft-FtPinG0001877200.01.T01	2e-115
81- 17:	Fe-evm.model.Fe2.14163	Ft-FtPinG0001876900.01.T01	0
81- 18:	Fe-evm.model.Fe2.14164	Ft-FtPinG0001876700.01.T01	8e-132
81- 19:	Fe-evm.model.Fe2.14166	Ft-FtPinG0001876200.01.T01	1e-144
81- 20:	Fe-evm.model.Fe2.14168	Ft-FtPinG0001876000.01.T01	0
81- 21:	Fe-evm.model.Fe2.14169	Ft-FtPinG0001875800.01.T01	0
81- 22:	Fe-evm.model.Fe2.14170	Ft-FtPinG0009768000.01.T01	0
81- 23:	Fe-evm.model.Fe2.14175	Ft-FtPinG0009767000.01.T01	2e-157
81- 24:	Fe-evm.model.Fe2.14176	Ft-FtPinG0009766800.01.T01	9e-179
81- 25:	Fe-evm.model.Fe2.14177	Ft-FtPinG0009766600.01.T01	0
81- 26:	Fe-evm.model.Fe2.14178	Ft-FtPinG0009766400.01.T01	0
81- 27:	Fe-evm.model.Fe2.14179	Ft-FtPinG0009765900.01.T01	1e-22
81- 28:	Fe-evm.model.Fe2.14182	Ft-FtPinG0009765800.01.T01	5e-114
81- 29:	Fe-evm.model.Fe2.14184	Ft-FtPinG0009765500.01.T01	0
81- 30:	Fe-evm.model.Fe2.14185	Ft-FtPinG0009765400.01.T01	0
81- 31:	Fe-evm.model.Fe2.14187	Ft-FtPinG0005495600.01.T01	0
81- 32:	Fe-evm.model.Fe2.14188	Ft-FtPinG0005495300.01.T01	0
81- 33:	Fe-evm.model.Fe2.14189	Ft-FtPinG0005495200.01.T01	8e-75
81- 34:	Fe-evm.model.Fe2.14190	Ft-FtPinG0005495000.01.T01	0
81- 35:	Fe-evm.model.Fe2.14191	Ft-FtPinG0005494700.01.T01	9e-158
81- 36:	Fe-evm.model.Fe2.14192	Ft-FtPinG0005494500.01.T01	0
81- 37:	Fe-evm.model.Fe2.14193	Ft-FtPinG0005494300.01.T01	1e-163
81- 38:	Fe-evm.model.Fe2.14194	Ft-FtPinG0005494100.01.T01	0
81- 39:	Fe-evm.model.Fe2.14195	Ft-FtPinG0005493700.01.T01	0
## Alignment 82: score=1808.0 e_value=1.3e-134 N=37 Fe-GWHBJBK00000002&Ft-Ft1 plus
82- 0:	Fe-evm.model.Fe2.4465	Ft-FtPinG0004634700.01.T01	0
82- 1:	Fe-evm.model.Fe2.4470	Ft-FtPinG0004634900.01.T01	0
82- 2:	Fe-evm.model.Fe2.4471	Ft-FtPinG0004635200.01.T01	0
82- 3:	Fe-evm.model.Fe2.4480	Ft-FtPinG0004635500.01.T01	0
82- 4:	Fe-evm.model.Fe2.4481	Ft-FtPinG0004635800.01.T01	0
82- 5:	Fe-evm.model.Fe2.4486	Ft-FtPinG0004636300.01.T01	5e-95
82- 6:	Fe-evm.model.Fe2.4515	Ft-FtPinG0004637200.01.T02	0
82- 7:	Fe-evm.model.Fe2.4521	Ft-FtPinG0004637600.01.T01	0
82- 8:	Fe-evm.model.Fe2.4531	Ft-FtPinG0004637900.01.T02	0
82- 9:	Fe-evm.model.Fe2.4543	Ft-FtPinG0004638100.01.T01	0
82- 10:	Fe-evm.model.Fe2.4548	Ft-FtPinG0001847800.01.T01	0
82- 11:	Fe-evm.model.Fe2.4549	Ft-FtPinG0001847500.01.T01	2e-109
82- 12:	Fe-evm.model.Fe2.4586	Ft-FtPinG0001847300.01.T01	0
82- 13:	Fe-evm.model.Fe2.4594	Ft-FtPinG0001847100.01.T01	0
82- 14:	Fe-evm.model.Fe2.4602	Ft-FtPinG0001845700.01.T01	0
82- 15:	Fe-evm.model.Fe2.4617	Ft-FtPinG0001845600.01.T01	1e-116
82- 16:	Fe-evm.model.Fe2.4619	Ft-FtPinG0001845400.01.T01	3e-127
82- 17:	Fe-evm.model.Fe2.4620	Ft-FtPinG0001845100.01.T01	6e-114
82- 18:	Fe-evm.model.Fe2.4638	Ft-FtPinG0001844900.01.T03	0
82- 19:	Fe-evm.model.Fe2.4644	Ft-FtPinG0001844800.01.T01	0
82- 20:	Fe-evm.model.Fe2.4665	Ft-FtPinG0008794300.01.T01	2e-103
82- 21:	Fe-evm.model.Fe2.4666	Ft-FtPinG0007135200.01.T01	0
82- 22:	Fe-evm.model.Fe2.4687	Ft-FtPinG0007135700.01.T01	0
82- 23:	Fe-evm.model.Fe2.4688	Ft-FtPinG0007136000.01.T01	1e-139
82- 24:	Fe-evm.model.Fe2.4705	Ft-FtPinG0007136300.01.T01	0
82- 25:	Fe-evm.model.Fe2.4706	Ft-FtPinG0007136600.01.T01	0
82- 26:	Fe-evm.model.Fe2.4710	Ft-FtPinG0007137000.01.T01	0
82- 27:	Fe-evm.model.Fe2.4712	Ft-FtPinG0007137200.01.T01	0
82- 28:	Fe-evm.model.Fe2.4745	Ft-FtPinG0007138000.01.T01	0
82- 29:	Fe-evm.model.Fe2.4749	Ft-FtPinG0007138100.01.T01	8e-167
82- 30:	Fe-evm.model.Fe2.4755	Ft-FtPinG0007139100.01.T01	0
82- 31:	Fe-evm.model.Fe2.4767	Ft-FtPinG0007139600.01.T01	0
82- 32:	Fe-evm.model.Fe2.4789	Ft-FtPinG0002631400.01.T01	0
82- 33:	Fe-evm.model.Fe2.4820	Ft-FtPinG0004169400.01.T01	5e-80
82- 34:	Fe-evm.model.Fe2.4833	Ft-FtPinG0004169500.01.T01	0
82- 35:	Fe-evm.model.Fe2.4856	Ft-FtPinG0007086600.01.T01	0
82- 36:	Fe-evm.model.Fe2.4864	Ft-FtPinG0007087000.01.T01	0
## Alignment 83: score=1639.0 e_value=1.4e-104 N=33 Fe-GWHBJBK00000002&Ft-Ft1 plus
83- 0:	Fe-evm.model.Fe2.14093	Ft-FtPinG0005493500.01.T01	0
83- 1:	Fe-evm.model.Fe2.14094	Ft-FtPinG0005493300.01.T01	0
83- 2:	Fe-evm.model.Fe2.14095	Ft-FtPinG0005493100.01.T01	2e-88
83- 3:	Fe-evm.model.Fe2.14096	Ft-FtPinG0005493000.01.T01	0
83- 4:	Fe-evm.model.Fe2.14097	Ft-FtPinG0005492300.01.T01	4e-137
83- 5:	Fe-evm.model.Fe2.14099	Ft-FtPinG0005492200.01.T01	0
83- 6:	Fe-evm.model.Fe2.14100	Ft-FtPinG0005491900.01.T01	5e-114
83- 7:	Fe-evm.model.Fe2.14102	Ft-FtPinG0005491700.01.T01	6e-138
83- 8:	Fe-evm.model.Fe2.14103	Ft-FtPinG0005491400.01.T01	6e-144
83- 9:	Fe-evm.model.Fe2.14104	Ft-FtPinG0005491200.01.T01	1e-62
83- 10:	Fe-evm.model.Fe2.14105	Ft-FtPinG0005490900.01.T01	8e-27
83- 11:	Fe-evm.model.Fe2.14106	Ft-FtPinG0005490700.01.T01	0
83- 12:	Fe-evm.model.Fe2.14107	Ft-FtPinG0005490000.01.T01	0
83- 13:	Fe-evm.model.Fe2.14110	Ft-FtPinG0005489200.01.T02	2e-69
83- 14:	Fe-evm.model.Fe2.14111	Ft-FtPinG0005488900.01.T01	0
83- 15:	Fe-evm.model.Fe2.14112	Ft-FtPinG0005488700.01.T01	3e-125
83- 16:	Fe-evm.model.Fe2.14113	Ft-FtPinG0005488300.01.T01	0
83- 17:	Fe-evm.model.Fe2.14114	Ft-FtPinG0005487900.01.T01	0
83- 18:	Fe-evm.model.Fe2.14115	Ft-FtPinG0005487800.01.T01	0
83- 19:	Fe-evm.model.Fe2.14116	Ft-FtPinG0005486800.01.T01	0
83- 20:	Fe-evm.model.Fe2.14118	Ft-FtPinG0005486600.01.T01	3e-89
83- 21:	Fe-evm.model.Fe2.14119	Ft-FtPinG0005486200.01.T01	0
83- 22:	Fe-evm.model.Fe2.14120	Ft-FtPinG0005486000.01.T01	2e-111
83- 23:	Fe-evm.model.Fe2.14121	Ft-FtPinG0005485800.01.T01	0
83- 24:	Fe-evm.model.Fe2.14122	Ft-FtPinG0005485500.01.T01	2e-122
83- 25:	Fe-evm.model.Fe2.14124	Ft-FtPinG0005485300.01.T01	7e-44
83- 26:	Fe-evm.model.Fe2.14125	Ft-FtPinG0005485200.01.T01	4e-150
83- 27:	Fe-evm.model.Fe2.14127	Ft-FtPinG0005484800.01.T01	0
83- 28:	Fe-evm.model.Fe2.14128	Ft-FtPinG0005484600.01.T01	0
83- 29:	Fe-evm.model.Fe2.14130	Ft-FtPinG0005484200.01.T01	4e-45
83- 30:	Fe-evm.model.Fe2.14131	Ft-FtPinG0005483900.01.T01	6e-101
83- 31:	Fe-evm.model.Fe2.14133	Ft-FtPinG0005483600.01.T01	0
83- 32:	Fe-evm.model.Fe2.14134	Ft-FtPinG0005483300.01.T01	0
## Alignment 84: score=1344.0 e_value=7.9e-100 N=30 Fe-GWHBJBK00000002&Ft-Ft1 plus
84- 0:	Fe-evm.model.Fe2.10339	Ft-FtPinG0005626700.01.T01	0
84- 1:	Fe-evm.model.Fe2.10349	Ft-FtPinG0005626000.01.T01	0
84- 2:	Fe-evm.model.Fe2.10351	Ft-FtPinG0005625800.01.T02	8e-86
84- 3:	Fe-evm.model.Fe2.10352	Ft-FtPinG0005625500.01.T01	7e-173
84- 4:	Fe-evm.model.Fe2.10376	Ft-FtPinG0005624700.01.T01	0
84- 5:	Fe-evm.model.Fe2.10394	Ft-FtPinG0005624500.01.T01	0
84- 6:	Fe-evm.model.Fe2.10408	Ft-FtPinG0005624400.01.T01	5e-142
84- 7:	Fe-evm.model.Fe2.10409	Ft-FtPinG0005623800.01.T01	3e-72
84- 8:	Fe-evm.model.Fe2.10455	Ft-FtPinG0005622900.01.T01	0
84- 9:	Fe-evm.model.Fe2.10480	Ft-FtPinG0005622400.01.T01	3e-68
84- 10:	Fe-evm.model.Fe2.10481	Ft-FtPinG0005622200.01.T01	0
84- 11:	Fe-evm.model.Fe2.10518	Ft-FtPinG0005619300.01.T01	0
84- 12:	Fe-evm.model.Fe2.10534	Ft-FtPinG0005618800.01.T01	0
84- 13:	Fe-evm.model.Fe2.10541	Ft-FtPinG0005617300.01.T01	5e-169
84- 14:	Fe-evm.model.Fe2.10588	Ft-FtPinG0005615200.01.T01	2e-74
84- 15:	Fe-evm.model.Fe2.10603	Ft-FtPinG0005613200.01.T01	0
84- 16:	Fe-evm.model.Fe2.10627	Ft-FtPinG0005612100.01.T01	8e-69
84- 17:	Fe-evm.model.Fe2.10637	Ft-FtPinG0005611300.01.T01	0
84- 18:	Fe-evm.model.Fe2.10643	Ft-FtPinG0005610200.01.T01	1e-34
84- 19:	Fe-evm.model.Fe2.10699	Ft-FtPinG0005609900.01.T01	2e-27
84- 20:	Fe-evm.model.Fe2.10712	Ft-FtPinG0005608000.01.T01	0
84- 21:	Fe-evm.model.Fe2.10739	Ft-FtPinG0005607600.01.T01	0
84- 22:	Fe-evm.model.Fe2.10743	Ft-FtPinG0005607000.01.T01	1e-47
84- 23:	Fe-evm.model.Fe2.10766	Ft-FtPinG0005606600.01.T01	0
84- 24:	Fe-evm.model.Fe2.10793	Ft-FtPinG0005606100.01.T01	1e-141
84- 25:	Fe-evm.model.Fe2.10803	Ft-FtPinG0005604700.01.T01	1e-133
84- 26:	Fe-evm.model.Fe2.10804	Ft-FtPinG0005604300.01.T01	0
84- 27:	Fe-evm.model.Fe2.10805	Ft-FtPinG0005604000.01.T01	0
84- 28:	Fe-evm.model.Fe2.10807	Ft-FtPinG0005603300.01.T01	7e-103
84- 29:	Fe-evm.model.Fe2.10808	Ft-FtPinG0005603000.01.T01	1e-101
## Alignment 85: score=1108.0 e_value=1e-73 N=24 Fe-GWHBJBK00000002&Ft-Ft1 plus
85- 0:	Fe-evm.model.Fe2.13724	Ft-FtPinG0001027400.01.T01	2e-45
85- 1:	Fe-evm.model.Fe2.13738	Ft-FtPinG0001027800.01.T01	6e-92
85- 2:	Fe-evm.model.Fe2.13739	Ft-FtPinG0001028600.01.T01	0
85- 3:	Fe-evm.model.Fe2.13747	Ft-FtPinG0001029300.01.T02	0
85- 4:	Fe-evm.model.Fe2.13752	Ft-FtPinG0001030700.01.T01	4e-25
85- 5:	Fe-evm.model.Fe2.13766	Ft-FtPinG0001031700.01.T01	2e-162
85- 6:	Fe-evm.model.Fe2.13770	Ft-FtPinG0001032300.01.T01	4e-17
85- 7:	Fe-evm.model.Fe2.13777	Ft-FtPinG0001032700.01.T01	0
85- 8:	Fe-evm.model.Fe2.13778	Ft-FtPinG0001033300.01.T01	0
85- 9:	Fe-evm.model.Fe2.13779	Ft-FtPinG0001033800.01.T01	5e-71
85- 10:	Fe-evm.model.Fe2.13781	Ft-FtPinG0001035000.01.T01	1e-33
85- 11:	Fe-evm.model.Fe2.13782	Ft-FtPinG0001035400.01.T01	8e-28
85- 12:	Fe-evm.model.Fe2.13784	Ft-FtPinG0001037700.01.T01	2e-30
85- 13:	Fe-evm.model.Fe2.13785	Ft-FtPinG0001038200.01.T01	0
85- 14:	Fe-evm.model.Fe2.13789	Ft-FtPinG0001039100.01.T01	2e-138
85- 15:	Fe-evm.model.Fe2.13792	Ft-FtPinG0001879900.01.T01	5e-86
85- 16:	Fe-evm.model.Fe2.13793	Ft-FtPinG0001878200.01.T01	3e-79
85- 17:	Fe-evm.model.Fe2.13795	Ft-FtPinG0001877200.01.T01	9e-81
85- 18:	Fe-evm.model.Fe2.13796	Ft-FtPinG0001876900.01.T01	0
85- 19:	Fe-evm.model.Fe2.13801	Ft-FtPinG0009768000.01.T01	2e-121
85- 20:	Fe-evm.model.Fe2.13804	Ft-FtPinG0009765800.01.T01	7e-72
85- 21:	Fe-evm.model.Fe2.13806	Ft-FtPinG0009765500.01.T01	4e-151
85- 22:	Fe-evm.model.Fe2.13815	Ft-FtPinG0005495300.01.T01	3e-153
85- 23:	Fe-evm.model.Fe2.13817	Ft-FtPinG0005494700.01.T01	2e-90
## Alignment 86: score=1092.0 e_value=7e-66 N=23 Fe-GWHBJBK00000002&Ft-Ft1 plus
86- 0:	Fe-evm.model.Fe2.14060	Ft-FtPinG0003161400.01.T01	8e-159
86- 1:	Fe-evm.model.Fe2.14064	Ft-FtPinG0003160200.01.T01	2e-153
86- 2:	Fe-evm.model.Fe2.14069	Ft-FtPinG0003159200.01.T01	1e-21
86- 3:	Fe-evm.model.Fe2.14070	Ft-FtPinG0003159000.01.T01	5e-33
86- 4:	Fe-evm.model.Fe2.14073	Ft-FtPinG0003157700.01.T01	4e-48
86- 5:	Fe-evm.model.Fe2.14077	Ft-FtPinG0003156600.01.T01	0
86- 6:	Fe-evm.model.Fe2.14078	Ft-FtPinG0003156300.01.T01	4e-139
86- 7:	Fe-evm.model.Fe2.14092	Ft-FtPinG0003154300.01.T01	4e-115
86- 8:	Fe-evm.model.Fe2.14094	Ft-FtPinG0003153300.01.T02	0
86- 9:	Fe-evm.model.Fe2.14097	Ft-FtPinG0003151100.01.T01	2e-106
86- 10:	Fe-evm.model.Fe2.14099	Ft-FtPinG0003150800.01.T01	0
86- 11:	Fe-evm.model.Fe2.14102	Ft-FtPinG0003150500.01.T01	2e-164
86- 12:	Fe-evm.model.Fe2.14105	Ft-FtPinG0003150100.01.T01	0
86- 13:	Fe-evm.model.Fe2.14108	Ft-FtPinG0003149600.01.T01	3e-94
86- 14:	Fe-evm.model.Fe2.14110	Ft-FtPinG0003149200.01.T01	1e-70
86- 15:	Fe-evm.model.Fe2.14112	Ft-FtPinG0003148900.01.T01	6e-81
86- 16:	Fe-evm.model.Fe2.14114	Ft-FtPinG0003148300.01.T01	6e-129
86- 17:	Fe-evm.model.Fe2.14115	Ft-FtPinG0003148200.01.T01	1e-171
86- 18:	Fe-evm.model.Fe2.14116	Ft-FtPinG0003147600.01.T01	9e-118
86- 19:	Fe-evm.model.Fe2.14118	Ft-FtPinG0003147200.01.T01	3e-18
86- 20:	Fe-evm.model.Fe2.14119	Ft-FtPinG0003146400.01.T01	9e-106
86- 21:	Fe-evm.model.Fe2.14131	Ft-FtPinG0003145300.01.T01	6e-48
86- 22:	Fe-evm.model.Fe2.14133	Ft-FtPinG0003145200.01.T01	6e-161
## Alignment 87: score=773.0 e_value=4e-50 N=18 Fe-GWHBJBK00000002&Ft-Ft1 plus
87- 0:	Fe-evm.model.Fe2.13041	Ft-FtPinG0000019300.01.T01	7e-30
87- 1:	Fe-evm.model.Fe2.13048	Ft-FtPinG0006543100.01.T01	0
87- 2:	Fe-evm.model.Fe2.13051	Ft-FtPinG0006544100.01.T01	2e-66
87- 3:	Fe-evm.model.Fe2.13059	Ft-FtPinG0006546600.01.T01	0
87- 4:	Fe-evm.model.Fe2.13073	Ft-FtPinG0006548400.01.T01	9e-77
87- 5:	Fe-evm.model.Fe2.13080	Ft-FtPinG0006550900.01.T01	7e-170
87- 6:	Fe-evm.model.Fe2.13120	Ft-FtPinG0006552500.01.T01	0
87- 7:	Fe-evm.model.Fe2.13133	Ft-FtPinG0006554400.01.T01	4e-161
87- 8:	Fe-evm.model.Fe2.13134	Ft-FtPinG0006555200.01.T01	5e-73
87- 9:	Fe-evm.model.Fe2.13137	Ft-FtPinG0006558500.01.T01	0
87- 10:	Fe-evm.model.Fe2.13144	Ft-FtPinG0006563400.01.T01	6e-86
87- 11:	Fe-evm.model.Fe2.13155	Ft-FtPinG0006563600.01.T01	3e-138
87- 12:	Fe-evm.model.Fe2.13157	Ft-FtPinG0006565500.01.T01	0
87- 13:	Fe-evm.model.Fe2.13160	Ft-FtPinG0006565700.01.T01	0
87- 14:	Fe-evm.model.Fe2.13163	Ft-FtPinG0006567500.01.T01	0
87- 15:	Fe-evm.model.Fe2.13164	Ft-FtPinG0002535600.01.T01	7e-146
87- 16:	Fe-evm.model.Fe2.13165	Ft-FtPinG0002535800.01.T01	0
87- 17:	Fe-evm.model.Fe2.13166	Ft-FtPinG0002536300.01.T01	2e-175
## Alignment 88: score=733.0 e_value=8.4e-44 N=15 Fe-GWHBJBK00000002&Ft-Ft1 plus
88- 0:	Fe-evm.model.Fe2.6790	Ft-FtPinG0005698800.01.T01	9e-175
88- 1:	Fe-evm.model.Fe2.6792	Ft-FtPinG0008364600.01.T01	0
88- 2:	Fe-evm.model.Fe2.6797	Ft-FtPinG0008365200.01.T01	6e-122
88- 3:	Fe-evm.model.Fe2.6798	Ft-FtPinG0008365300.01.T01	0
88- 4:	Fe-evm.model.Fe2.6806	Ft-FtPinG0008365700.01.T01	7e-132
88- 5:	Fe-evm.model.Fe2.6808	Ft-FtPinG0008366000.01.T01	0
88- 6:	Fe-evm.model.Fe2.6816	Ft-FtPinG0006327800.01.T01	4e-109
88- 7:	Fe-evm.model.Fe2.6818	Ft-FtPinG0006328200.01.T01	0
88- 8:	Fe-evm.model.Fe2.6821	Ft-FtPinG0007852400.01.T01	0
88- 9:	Fe-evm.model.Fe2.6835	Ft-FtPinG0007851400.01.T01	0
88- 10:	Fe-evm.model.Fe2.6858	Ft-FtPinG0007851200.01.T02	2e-110
88- 11:	Fe-evm.model.Fe2.6859	Ft-FtPinG0007850700.01.T01	0
88- 12:	Fe-evm.model.Fe2.6889	Ft-FtPinG0007651200.01.T01	6e-117
88- 13:	Fe-evm.model.Fe2.6904	Ft-FtPinG0007651000.01.T01	1e-101
88- 14:	Fe-evm.model.Fe2.6930	Ft-FtPinG0008474100.01.T01	5e-148
## Alignment 89: score=664.0 e_value=1.8e-33 N=14 Fe-GWHBJBK00000002&Ft-Ft1 plus
89- 0:	Fe-evm.model.Fe2.11199	Ft-FtPinG0003191800.01.T01	2e-172
89- 1:	Fe-evm.model.Fe2.11202	Ft-FtPinG0003191100.01.T01	6e-34
89- 2:	Fe-evm.model.Fe2.11215	Ft-FtPinG0003190200.01.T01	6e-36
89- 3:	Fe-evm.model.Fe2.11217	Ft-FtPinG0003190000.01.T01	3e-101
89- 4:	Fe-evm.model.Fe2.11231	Ft-FtPinG0003189400.01.T01	5e-77
89- 5:	Fe-evm.model.Fe2.11235	Ft-FtPinG0003188900.01.T01	0
89- 6:	Fe-evm.model.Fe2.11243	Ft-FtPinG0003188700.01.T01	3e-137
89- 7:	Fe-evm.model.Fe2.11249	Ft-FtPinG0003187700.01.T01	5e-17
89- 8:	Fe-evm.model.Fe2.11276	Ft-FtPinG0003186000.01.T01	6e-47
89- 9:	Fe-evm.model.Fe2.11286	Ft-FtPinG0003185100.01.T02	2e-27
89- 10:	Fe-evm.model.Fe2.11290	Ft-FtPinG0003184500.01.T01	9e-66
89- 11:	Fe-evm.model.Fe2.11291	Ft-FtPinG0003184300.01.T01	4e-129
89- 12:	Fe-evm.model.Fe2.11303	Ft-FtPinG0003183000.01.T01	0
89- 13:	Fe-evm.model.Fe2.11306	Ft-FtPinG0003182800.01.T01	2e-74
## Alignment 90: score=611.0 e_value=1.3e-35 N=14 Fe-GWHBJBK00000002&Ft-Ft1 plus
90- 0:	Fe-evm.model.Fe2.13631	Ft-FtPinG0004825000.01.T01	2e-71
90- 1:	Fe-evm.model.Fe2.13632	Ft-FtPinG0004824500.01.T01	0
90- 2:	Fe-evm.model.Fe2.13636	Ft-FtPinG0004823000.01.T01	0
90- 3:	Fe-evm.model.Fe2.13658	Ft-FtPinG0008701200.01.T01	2e-79
90- 4:	Fe-evm.model.Fe2.13662	Ft-FtPinG0008700300.01.T01	2e-162
90- 5:	Fe-evm.model.Fe2.13663	Ft-FtPinG0008699700.01.T01	0
90- 6:	Fe-evm.model.Fe2.13667	Ft-FtPinG0008698300.01.T01	5e-34
90- 7:	Fe-evm.model.Fe2.13673	Ft-FtPinG0008697300.01.T01	8e-59
90- 8:	Fe-evm.model.Fe2.13677	Ft-FtPinG0008695100.01.T01	7e-82
90- 9:	Fe-evm.model.Fe2.13683	Ft-FtPinG0008692700.01.T01	0
90- 10:	Fe-evm.model.Fe2.13684	Ft-FtPinG0008692500.01.T01	0
90- 11:	Fe-evm.model.Fe2.13705	Ft-FtPinG0008616100.01.T01	2e-113
90- 12:	Fe-evm.model.Fe2.13706	Ft-FtPinG0008615900.01.T01	0
90- 13:	Fe-evm.model.Fe2.13722	Ft-FtPinG0008613000.01.T01	0
## Alignment 91: score=602.0 e_value=2e-34 N=14 Fe-GWHBJBK00000002&Ft-Ft1 plus
91- 0:	Fe-evm.model.Fe2.12946	Ft-FtPinG0001707500.01.T01	2e-78
91- 1:	Fe-evm.model.Fe2.12953	Ft-FtPinG0000037500.01.T01	1e-164
91- 2:	Fe-evm.model.Fe2.12955	Ft-FtPinG0000037200.01.T01	7e-59
91- 3:	Fe-evm.model.Fe2.12959	Ft-FtPinG0000035900.01.T01	0
91- 4:	Fe-evm.model.Fe2.12962	Ft-FtPinG0000035600.01.T01	0
91- 5:	Fe-evm.model.Fe2.12968	Ft-FtPinG0000035400.01.T01	3e-83
91- 6:	Fe-evm.model.Fe2.12975	Ft-FtPinG0000033000.01.T01	0
91- 7:	Fe-evm.model.Fe2.12981	Ft-FtPinG0000032100.01.T01	0
91- 8:	Fe-evm.model.Fe2.12982	Ft-FtPinG0000031900.01.T01	0
91- 9:	Fe-evm.model.Fe2.12983	Ft-FtPinG0000030700.01.T01	0
91- 10:	Fe-evm.model.Fe2.12987	Ft-FtPinG0000030100.01.T01	0
91- 11:	Fe-evm.model.Fe2.12991	Ft-FtPinG0000026500.01.T01	0
91- 12:	Fe-evm.model.Fe2.12999	Ft-FtPinG0000020100.01.T01	3e-30
91- 13:	Fe-evm.model.Fe2.13009	Ft-FtPinG0006543100.01.T01	0
## Alignment 92: score=602.0 e_value=8.6e-34 N=13 Fe-GWHBJBK00000002&Ft-Ft1 plus
92- 0:	Fe-evm.model.Fe2.6015	Ft-FtPinG0008408800.01.T01	0
92- 1:	Fe-evm.model.Fe2.6151	Ft-FtPinG0008407900.01.T01	0
92- 2:	Fe-evm.model.Fe2.6169	Ft-FtPinG0008407800.01.T01	9e-60
92- 3:	Fe-evm.model.Fe2.6170	Ft-FtPinG0008407500.01.T01	8e-99
92- 4:	Fe-evm.model.Fe2.6232	Ft-FtPinG0007148500.01.T01	4e-125
92- 5:	Fe-evm.model.Fe2.6264	Ft-FtPinG0007148200.01.T01	3e-107
92- 6:	Fe-evm.model.Fe2.6290	Ft-FtPinG0007147500.01.T01	6e-124
92- 7:	Fe-evm.model.Fe2.6298	Ft-FtPinG0007147100.01.T01	0
92- 8:	Fe-evm.model.Fe2.6331	Ft-FtPinG0007951400.01.T01	0
92- 9:	Fe-evm.model.Fe2.6334	Ft-FtPinG0000364200.01.T01	2e-128
92- 10:	Fe-evm.model.Fe2.6366	Ft-FtPinG0000364600.01.T01	0
92- 11:	Fe-evm.model.Fe2.6384	Ft-FtPinG0000364900.01.T01	2e-82
92- 12:	Fe-evm.model.Fe2.6396	Ft-FtPinG0000365800.01.T01	6e-54
## Alignment 93: score=595.0 e_value=1.2e-25 N=12 Fe-GWHBJBK00000002&Ft-Ft1 plus
93- 0:	Fe-evm.model.Fe2.13479	Ft-FtPinG0005827200.01.T01	0
93- 1:	Fe-evm.model.Fe2.13484	Ft-FtPinG0005826600.01.T01	5e-137
93- 2:	Fe-evm.model.Fe2.13485	Ft-FtPinG0005826300.01.T01	2e-38
93- 3:	Fe-evm.model.Fe2.13486	Ft-FtPinG0005826000.01.T01	0
93- 4:	Fe-evm.model.Fe2.13487	Ft-FtPinG0005825700.01.T01	0
93- 5:	Fe-evm.model.Fe2.13488	Ft-FtPinG0005825500.01.T01	0
93- 6:	Fe-evm.model.Fe2.13489	Ft-FtPinG0005825300.01.T01	2e-123
93- 7:	Fe-evm.model.Fe2.13492	Ft-FtPinG0005825200.01.T01	0
93- 8:	Fe-evm.model.Fe2.13496	Ft-FtPinG0005825000.01.T01	0
93- 9:	Fe-evm.model.Fe2.13497	Ft-FtPinG0005824600.01.T01	0
93- 10:	Fe-evm.model.Fe2.13498	Ft-FtPinG0005824300.01.T01	1e-126
93- 11:	Fe-evm.model.Fe2.13500	Ft-FtPinG0005824100.01.T01	0
## Alignment 94: score=585.0 e_value=4.5e-28 N=12 Fe-GWHBJBK00000002&Ft-Ft1 plus
94- 0:	Fe-evm.model.Fe2.12519	Ft-FtPinG0006444600.01.T02	0
94- 1:	Fe-evm.model.Fe2.12520	Ft-FtPinG0006444800.01.T01	0
94- 2:	Fe-evm.model.Fe2.12521	Ft-FtPinG0006445300.01.T02	0
94- 3:	Fe-evm.model.Fe2.12522	Ft-FtPinG0006445700.01.T01	5e-177
94- 4:	Fe-evm.model.Fe2.12523	Ft-FtPinG0006445900.01.T01	4e-161
94- 5:	Fe-evm.model.Fe2.12524	Ft-FtPinG0006446100.01.T01	4e-141
94- 6:	Fe-evm.model.Fe2.12525	Ft-FtPinG0006446400.01.T01	7e-120
94- 7:	Fe-evm.model.Fe2.12540	Ft-FtPinG0006446600.01.T01	0
94- 8:	Fe-evm.model.Fe2.12548	Ft-FtPinG0006446900.01.T01	0
94- 9:	Fe-evm.model.Fe2.12549	Ft-FtPinG0006447100.01.T01	0
94- 10:	Fe-evm.model.Fe2.12550	Ft-FtPinG0006447400.01.T01	0
94- 11:	Fe-evm.model.Fe2.12552	Ft-FtPinG0006447600.01.T01	1e-87
## Alignment 95: score=525.0 e_value=1.4e-29 N=12 Fe-GWHBJBK00000002&Ft-Ft1 plus
95- 0:	Fe-evm.model.Fe2.11578	Ft-FtPinG0003180500.01.T01	0
95- 1:	Fe-evm.model.Fe2.11591	Ft-FtPinG0003175600.01.T01	6e-30
95- 2:	Fe-evm.model.Fe2.11592	Ft-FtPinG0003175200.01.T01	6e-113
95- 3:	Fe-evm.model.Fe2.11597	Ft-FtPinG0003174700.01.T01	0
95- 4:	Fe-evm.model.Fe2.11644	Ft-FtPinG0003172000.01.T01	0
95- 5:	Fe-evm.model.Fe2.11648	Ft-FtPinG0003171800.01.T01	0
95- 6:	Fe-evm.model.Fe2.11666	Ft-FtPinG0003170600.01.T01	7e-157
95- 7:	Fe-evm.model.Fe2.11684	Ft-FtPinG0003169800.01.T02	0
95- 8:	Fe-evm.model.Fe2.11693	Ft-FtPinG0003168800.01.T01	0
95- 9:	Fe-evm.model.Fe2.11694	Ft-FtPinG0003168500.01.T01	2e-33
[truncated: 16,218 more rows]

## Sheet: Ft-Os
############### Parameters ###############
# MATCH_SCORE: 50
# MATCH_SIZE: 5
# GAP_PENALTY: -1
# OVERLAP_WINDOW: 5
# E_VALUE: 1e-05
# MAX GAPS: 25
############### Statistics ###############
# Number of collinear genes: 1520, Percentage: 2.05
# Number of all genes: 74028
##########################################
## Alignment 0: score=285.0 e_value=1.5e-08 N=6 Ft-Ft1&Os-Chr1 plus
0- 0:	Ft-FtPinG0006046600.01.T01	Os-LOC_Os01g07480.2.MSUv7.0	6e-71
0- 1:	Ft-FtPinG0006046800.01.T01	Os-LOC_Os01g07500.1.MSUv7.0	2e-150
0- 2:	Ft-FtPinG0006047200.01.T01	Os-LOC_Os01g07530.1.MSUv7.0	3e-46
0- 3:	Ft-FtPinG0006047300.01.T01	Os-LOC_Os01g07540.1.MSUv7.0	3e-75
0- 4:	Ft-FtPinG0006048000.01.T01	Os-LOC_Os01g07570.1.MSUv7.0	0
0- 5:	Ft-FtPinG0006049400.01.T01	Os-LOC_Os01g07700.1.MSUv7.0	2e-124
## Alignment 1: score=280.0 e_value=4.7e-08 N=6 Ft-Ft1&Os-Chr1 plus
1- 0:	Ft-FtPinG0005823900.01.T01	Os-LOC_Os01g07480.2.MSUv7.0	6e-68
1- 1:	Ft-FtPinG0005823700.01.T01	Os-LOC_Os01g07520.1.MSUv7.0	2e-19
1- 2:	Ft-FtPinG0005823000.01.T01	Os-LOC_Os01g07560.1.MSUv7.0	0
1- 3:	Ft-FtPinG0005821500.01.T01	Os-LOC_Os01g07570.1.MSUv7.0	0
1- 4:	Ft-FtPinG0005819500.01.T01	Os-LOC_Os01g07700.1.MSUv7.0	2e-125
1- 5:	Ft-FtPinG0005819400.01.T01	Os-LOC_Os01g07730.1.MSUv7.0	2e-129
## Alignment 2: score=345.0 e_value=1.8e-14 N=8 Ft-Ft1&Os-Chr1 minus
2- 0:	Ft-FtPinG0005492700.01.T01	Os-LOC_Os01g70360.1.MSUv7.0	0
2- 1:	Ft-FtPinG0005491400.01.T01	Os-LOC_Os01g70140.1.MSUv7.0	2e-101
2- 2:	Ft-FtPinG0005487900.01.T01	Os-LOC_Os01g70020.1.MSUv7.0	3e-67
2- 3:	Ft-FtPinG0005487800.01.T01	Os-LOC_Os01g70010.1.MSUv7.0	2e-140
2- 4:	Ft-FtPinG0005486600.01.T01	Os-LOC_Os01g69960.1.MSUv7.0	7e-11
2- 5:	Ft-FtPinG0005485200.01.T01	Os-LOC_Os01g69900.1.MSUv7.0	0
2- 6:	Ft-FtPinG0005483600.01.T01	Os-LOC_Os01g69270.1.MSUv7.0	1e-94
2- 7:	Ft-FtPinG0005483200.01.T01	Os-LOC_Os01g69230.1.MSUv7.0	2e-176
## Alignment 3: score=308.0 e_value=4.7e-11 N=7 Ft-Ft1&Os-Chr1 minus
3- 0:	Ft-FtPinG0001013000.01.T01	Os-LOC_Os01g61060.1.MSUv7.0	1e-109
3- 1:	Ft-FtPinG0001014900.01.T01	Os-LOC_Os01g61030.1.MSUv7.0	6e-107
3- 2:	Ft-FtPinG0001018400.01.T01	Os-LOC_Os01g60910.1.MSUv7.0	5e-139
3- 3:	Ft-FtPinG0001018900.01.T01	Os-LOC_Os01g60810.1.MSUv7.0	2e-26
3- 4:	Ft-FtPinG0001020400.01.T01	Os-LOC_Os01g60790.1.MSUv7.0	5e-53
3- 5:	Ft-FtPinG0001023100.01.T01	Os-LOC_Os01g60700.1.MSUv7.0	0
3- 6:	Ft-FtPinG0001023600.01.T01	Os-LOC_Os01g60670.1.MSUv7.0	0
## Alignment 4: score=356.0 e_value=1.8e-15 N=8 Ft-Ft1&Os-Chr10 plus
4- 0:	Ft-FtPinG0001922700.01.T01	Os-LOC_Os10g28230.1.MSUv7.0	7e-73
4- 1:	Ft-FtPinG0001923900.01.T01	Os-LOC_Os10g28240.1.MSUv7.0	0
4- 2:	Ft-FtPinG0001924400.01.T01	Os-LOC_Os10g28340.1.MSUv7.0	1e-105
4- 3:	Ft-FtPinG0001926600.01.T01	Os-LOC_Os10g28610.1.MSUv7.0	3e-29
4- 4:	Ft-FtPinG0001927300.01.T01	Os-LOC_Os10g28640.1.MSUv7.0	3e-123
4- 5:	Ft-FtPinG0001927700.01.T01	Os-LOC_Os10g28660.1.MSUv7.0	0
4- 6:	Ft-FtPinG0007833300.01.T02	Os-LOC_Os10g28665.1.MSUv7.0	0
4- 7:	Ft-FtPinG0007831800.01.T01	Os-LOC_Os10g28680.1.MSUv7.0	6e-26
## Alignment 5: score=312.0 e_value=1.2e-15 N=7 Ft-Ft1&Os-Chr10 plus
5- 0:	Ft-FtPinG0009047800.01.T01	Os-LOC_Os10g21266.1.MSUv7.0	0
5- 1:	Ft-FtPinG0008816500.01.T01	Os-LOC_Os10g21310.1.MSUv7.0	0
5- 2:	Ft-FtPinG0007917600.01.T01	Os-LOC_Os10g21324.1.MSUv7.0	2e-111
5- 3:	Ft-FtPinG0007917200.01.T01	Os-LOC_Os10g21326.1.MSUv7.0	5e-94
5- 4:	Ft-FtPinG0008817800.01.T01	Os-LOC_Os10g21342.1.MSUv7.0	5e-61
5- 5:	Ft-FtPinG0007752000.01.T01	Os-LOC_Os10g21358.1.MSUv7.0	3e-18
5- 6:	Ft-FtPinG0008821000.01.T01	Os-LOC_Os10g21372.1.MSUv7.0	5e-40
## Alignment 6: score=261.0 e_value=8e-10 N=6 Ft-Ft1&Os-Chr10 plus
6- 0:	Ft-FtPinG0001872200.01.T01	Os-LOC_Os10g41310.1.MSUv7.0	0
6- 1:	Ft-FtPinG0001869900.01.T01	Os-LOC_Os10g41410.1.MSUv7.0	2e-62
6- 2:	Ft-FtPinG0001869600.01.T01	Os-LOC_Os10g41430.1.MSUv7.0	2e-60
6- 3:	Ft-FtPinG0001866800.01.T01	Os-LOC_Os10g41520.1.MSUv7.0	4e-146
6- 4:	Ft-FtPinG0001866400.01.T01	Os-LOC_Os10g41534.3.MSUv7.0	1e-143
6- 5:	Ft-FtPinG0001863800.01.T01	Os-LOC_Os10g41820.2.MSUv7.0	5e-160
## Alignment 7: score=319.0 e_value=3.8e-13 N=7 Ft-Ft1&Os-Chr10 minus
7- 0:	Ft-FtPinG0007914400.01.T01	Os-LOC_Os10g21418.1.MSUv7.0	3e-156
7- 1:	Ft-FtPinG0005133500.01.T01	Os-LOC_Os10g21406.1.MSUv7.0	4e-53
7- 2:	Ft-FtPinG0007915000.01.T01	Os-LOC_Os10g21402.1.MSUv7.0	2e-33
7- 3:	Ft-FtPinG0007915300.01.T01	Os-LOC_Os10g21398.1.MSUv7.0	9e-104
7- 4:	Ft-FtPinG0007916900.01.T01	Os-LOC_Os10g21342.1.MSUv7.0	5e-61
7- 5:	Ft-FtPinG0008817400.01.T01	Os-LOC_Os10g21328.1.MSUv7.0	7e-83
7- 6:	Ft-FtPinG0007917800.01.T01	Os-LOC_Os10g21310.1.MSUv7.0	0
## Alignment 8: score=425.0 e_value=2.2e-21 N=10 Ft-Ft1&Os-Chr11 plus
8- 0:	Ft-FtPinG0005752800.01.T01	Os-LOC_Os11g02150.1.MSUv7.0	4e-43
8- 1:	Ft-FtPinG0005752100.01.T01	Os-LOC_Os11g02190.1.MSUv7.0	9e-148
8- 2:	Ft-FtPinG0005751900.01.T01	Os-LOC_Os11g02240.1.MSUv7.0	6e-97
8- 3:	Ft-FtPinG0004833600.01.T01	Os-LOC_Os11g02369.1.MSUv7.0	8e-32
8- 4:	Ft-FtPinG0004832800.01.T01	Os-LOC_Os11g02424.1.MSUv7.0	7e-50
8- 5:	Ft-FtPinG0004830800.01.T01	Os-LOC_Os11g02450.1.MSUv7.0	4e-116
8- 6:	Ft-FtPinG0004829800.01.T01	Os-LOC_Os11g02570.1.MSUv7.0	4e-31
8- 7:	Ft-FtPinG0004826500.01.T02	Os-LOC_Os11g02630.1.MSUv7.0	1e-104
8- 8:	Ft-FtPinG0004825800.01.T01	Os-LOC_Os11g02670.1.MSUv7.0	7e-69
8- 9:	Ft-FtPinG0004825400.01.T01	Os-LOC_Os11g03050.1.MSUv7.0	0
## Alignment 9: score=341.0 e_value=6.6e-14 N=8 Ft-Ft1&Os-Chr11 plus
9- 0:	Ft-FtPinG0001011600.01.T01	Os-LOC_Os11g01780.1.MSUv7.0	0
9- 1:	Ft-FtPinG0001013000.01.T01	Os-LOC_Os11g01842.1.MSUv7.0	5e-109
9- 2:	Ft-FtPinG0001015200.01.T01	Os-LOC_Os11g01872.1.MSUv7.0	0
9- 3:	Ft-FtPinG0001015500.01.T01	Os-LOC_Os11g02150.1.MSUv7.0	3e-39
9- 4:	Ft-FtPinG0001019400.01.T01	Os-LOC_Os11g02300.1.MSUv7.0	4e-153
9- 5:	Ft-FtPinG0001019600.01.T01	Os-LOC_Os11g02320.2.MSUv7.0	4e-156
9- 6:	Ft-FtPinG0001022300.01.T01	Os-LOC_Os11g02369.1.MSUv7.0	6e-37
9- 7:	Ft-FtPinG0001023800.01.T01	Os-LOC_Os11g02464.1.MSUv7.0	0
## Alignment 10: score=251.0 e_value=3e-09 N=6 Ft-Ft1&Os-Chr11 plus
10- 0:	Ft-FtPinG0008012700.01.T01	Os-LOC_Os11g05400.1.MSUv7.0	0
10- 1:	Ft-FtPinG0008012600.01.T01	Os-LOC_Os11g05470.1.MSUv7.0	6e-90
10- 2:	Ft-FtPinG0005759000.01.T01	Os-LOC_Os11g05614.1.MSUv7.0	8e-58
10- 3:	Ft-FtPinG0005758500.01.T01	Os-LOC_Os11g05740.1.MSUv7.0	2e-53
10- 4:	Ft-FtPinG0005755500.01.T01	Os-LOC_Os11g05860.1.MSUv7.0	2e-57
10- 5:	Ft-FtPinG0005754700.01.T01	Os-LOC_Os11g05880.1.MSUv7.0	0
## Alignment 11: score=310.0 e_value=6.8e-14 N=8 Ft-Ft1&Os-Chr11 minus
11- 0:	Ft-FtPinG0003154300.01.T01	Os-LOC_Os11g32100.1.MSUv7.0	9e-72
11- 1:	Ft-FtPinG0003153300.01.T02	Os-LOC_Os11g31980.1.MSUv7.0	0
11- 2:	Ft-FtPinG0003153100.01.T01	Os-LOC_Os11g31950.1.MSUv7.0	2e-128
11- 3:	Ft-FtPinG0003151300.01.T02	Os-LOC_Os11g31640.1.MSUv7.0	0
11- 4:	Ft-FtPinG0003150800.01.T01	Os-LOC_Os11g31590.1.MSUv7.0	1e-51
11- 5:	Ft-FtPinG0003149600.01.T01	Os-LOC_Os11g31190.1.MSUv7.0	6e-98
11- 6:	Ft-FtPinG0003148700.01.T01	Os-LOC_Os11g31090.1.MSUv7.0	1e-158
11- 7:	Ft-FtPinG0003146400.01.T01	Os-LOC_Os11g30560.1.MSUv7.0	1e-96
## Alignment 12: score=259.0 e_value=1e-08 N=6 Ft-Ft1&Os-Chr11 minus
12- 0:	Ft-FtPinG0002449100.01.T01	Os-LOC_Os11g02180.1.MSUv7.0	2e-132
12- 1:	Ft-FtPinG0002448300.01.T01	Os-LOC_Os11g02130.1.MSUv7.0	2e-156
12- 2:	Ft-FtPinG0002447800.01.T01	Os-LOC_Os11g02070.1.MSUv7.0	3e-75
12- 3:	Ft-FtPinG0002447500.01.T01	Os-LOC_Os11g02054.1.MSUv7.0	2e-35
12- 4:	Ft-FtPinG0002446400.01.T01	Os-LOC_Os11g01842.1.MSUv7.0	1e-114
12- 5:	Ft-FtPinG0002445000.01.T01	Os-LOC_Os11g01570.1.MSUv7.0	6e-120
## Alignment 13: score=385.0 e_value=7.8e-18 N=9 Ft-Ft1&Os-Chr12 plus
13- 0:	Ft-FtPinG0005752800.01.T01	Os-LOC_Os12g02094.1.MSUv7.0	1e-46
13- 1:	Ft-FtPinG0005752100.01.T01	Os-LOC_Os12g02130.1.MSUv7.0	6e-147
13- 2:	Ft-FtPinG0004833600.01.T01	Os-LOC_Os12g02310.1.MSUv7.0	2e-31
13- 3:	Ft-FtPinG0004832800.01.T01	Os-LOC_Os12g02350.1.MSUv7.0	3e-48
13- 4:	Ft-FtPinG0004830800.01.T01	Os-LOC_Os12g02380.1.MSUv7.0	9e-116
13- 5:	Ft-FtPinG0004829800.01.T01	Os-LOC_Os12g02500.1.MSUv7.0	2e-31
13- 6:	Ft-FtPinG0004826500.01.T02	Os-LOC_Os12g02550.1.MSUv7.0	1e-104
13- 7:	Ft-FtPinG0004825800.01.T01	Os-LOC_Os12g02620.1.MSUv7.0	2e-67
13- 8:	Ft-FtPinG0004825400.01.T01	Os-LOC_Os12g02820.1.MSUv7.0	0
## Alignment 14: score=334.0 e_value=9.2e-14 N=8 Ft-Ft1&Os-Chr12 plus
14- 0:	Ft-FtPinG0001011600.01.T01	Os-LOC_Os12g01760.1.MSUv7.0	0
14- 1:	Ft-FtPinG0001015200.01.T01	Os-LOC_Os12g01922.1.MSUv7.0	0
14- 2:	Ft-FtPinG0001015500.01.T01	Os-LOC_Os12g02094.1.MSUv7.0	3e-42
14- 3:	Ft-FtPinG0001016300.01.T01	Os-LOC_Os12g02200.2.MSUv7.0	0
14- 4:	Ft-FtPinG0001019400.01.T01	Os-LOC_Os12g02250.1.MSUv7.0	2e-153
14- 5:	Ft-FtPinG0001019600.01.T01	Os-LOC_Os12g02260.1.MSUv7.0	2e-159
14- 6:	Ft-FtPinG0001022300.01.T01	Os-LOC_Os12g02310.1.MSUv7.0	7e-37
14- 7:	Ft-FtPinG0001023800.01.T01	Os-LOC_Os12g02390.1.MSUv7.0	0
## Alignment 15: score=313.0 e_value=5.1e-12 N=7 Ft-Ft1&Os-Chr12 plus
15- 0:	Ft-FtPinG0002469100.01.T01	Os-LOC_Os12g05890.1.MSUv7.0	8e-14
15- 1:	Ft-FtPinG0002468700.01.T01	Os-LOC_Os12g05900.1.MSUv7.0	3e-140
15- 2:	Ft-FtPinG0002467600.01.T01	Os-LOC_Os12g05990.1.MSUv7.0	3e-62
15- 3:	Ft-FtPinG0002465900.01.T01	Os-LOC_Os12g06200.1.MSUv7.0	3e-134
15- 4:	Ft-FtPinG0002465300.01.T01	Os-LOC_Os12g06260.1.MSUv7.0	2e-67
15- 5:	Ft-FtPinG0002464300.01.T01	Os-LOC_Os12g06330.1.MSUv7.0	3e-98
15- 6:	Ft-FtPinG0002464000.01.T01	Os-LOC_Os12g06410.1.MSUv7.0	5e-69
## Alignment 16: score=322.0 e_value=3.8e-12 N=7 Ft-Ft1&Os-Chr2 plus
16- 0:	Ft-FtPinG0008015300.01.T01	Os-LOC_Os02g32650.1.MSUv7.0	9e-49
16- 1:	Ft-FtPinG0008014900.01.T01	Os-LOC_Os02g32660.1.MSUv7.0	0
16- 2:	Ft-FtPinG0008013800.01.T01	Os-LOC_Os02g32840.1.MSUv7.0	7e-37
16- 3:	Ft-FtPinG0008012600.01.T01	Os-LOC_Os02g32950.1.MSUv7.0	4e-88
16- 4:	Ft-FtPinG0008012000.01.T01	Os-LOC_Os02g32970.1.MSUv7.0	3e-151
16- 5:	Ft-FtPinG0006313000.01.T01	Os-LOC_Os02g32980.1.MSUv7.0	5e-70
16- 6:	Ft-FtPinG0006313500.01.T01	Os-LOC_Os02g32990.1.MSUv7.0	3e-20
## Alignment 17: score=266.0 e_value=7.9e-08 N=6 Ft-Ft1&Os-Chr2 plus
17- 0:	Ft-FtPinG0002469100.01.T01	Os-LOC_Os02g33090.1.MSUv7.0	4e-12
17- 1:	Ft-FtPinG0002467400.01.T01	Os-LOC_Os02g33230.1.MSUv7.0	0
17- 2:	Ft-FtPinG0002466400.01.T01	Os-LOC_Os02g33330.1.MSUv7.0	1e-15
17- 3:	Ft-FtPinG0002465900.01.T01	Os-LOC_Os02g33430.1.MSUv7.0	6e-134
17- 4:	Ft-FtPinG0002465300.01.T01	Os-LOC_Os02g33550.1.MSUv7.0	7e-57
17- 5:	Ft-FtPinG0002464000.01.T01	Os-LOC_Os02g33590.1.MSUv7.0	3e-74
## Alignment 18: score=468.0 e_value=5.2e-20 N=10 Ft-Ft1&Os-Chr2 minus
18- 0:	Ft-FtPinG0000141100.01.T01	Os-LOC_Os02g38440.1.MSUv7.0	2e-27
18- 1:	Ft-FtPinG0000142900.01.T01	Os-LOC_Os02g38350.1.MSUv7.0	1e-58
18- 2:	Ft-FtPinG0000145100.01.T01	Os-LOC_Os02g38290.1.MSUv7.0	4e-124
18- 3:	Ft-FtPinG0000145400.01.T02	Os-LOC_Os02g38260.1.MSUv7.0	0
18- 4:	Ft-FtPinG0000149500.01.T01	Os-LOC_Os02g38220.1.MSUv7.0	2e-94
18- 5:	Ft-FtPinG0000150400.01.T01	Os-LOC_Os02g38140.1.MSUv7.0	0
18- 6:	Ft-FtPinG0000150500.01.T01	Os-LOC_Os02g38120.1.MSUv7.0	1e-152
18- 7:	Ft-FtPinG0000150800.01.T01	Os-LOC_Os02g38090.1.MSUv7.0	3e-28
18- 8:	Ft-FtPinG0000151000.01.T01	Os-LOC_Os02g38040.1.MSUv7.0	7e-92
18- 9:	Ft-FtPinG0000151300.01.T01	Os-LOC_Os02g38020.1.MSUv7.0	0
## Alignment 19: score=314.0 e_value=7.4e-14 N=7 Ft-Ft1&Os-Chr2 minus
19- 0:	Ft-FtPinG0000067000.01.T01	Os-LOC_Os02g47420.3.MSUv7.0	1e-151
19- 1:	Ft-FtPinG0000066700.01.T01	Os-LOC_Os02g47400.1.MSUv7.0	0
19- 2:	Ft-FtPinG0000062600.01.T01	Os-LOC_Os02g47230.1.MSUv7.0	6e-86
19- 3:	Ft-FtPinG0004377600.01.T01	Os-LOC_Os02g47210.1.MSUv7.0	0
19- 4:	Ft-FtPinG0004377800.01.T02	Os-LOC_Os02g47200.1.MSUv7.0	2e-150
19- 5:	Ft-FtPinG0006129100.01.T01	Os-LOC_Os02g47020.1.MSUv7.0	0
19- 6:	Ft-FtPinG0006129800.01.T01	Os-LOC_Os02g47010.1.MSUv7.0	1e-122
## Alignment 20: score=259.0 e_value=8.4e-10 N=6 Ft-Ft1&Os-Chr2 minus
20- 0:	Ft-FtPinG0005832200.01.T01	Os-LOC_Os02g38320.1.MSUv7.0	1e-52
20- 1:	Ft-FtPinG0005830600.01.T01	Os-LOC_Os02g38240.1.MSUv7.0	8e-107
20- 2:	Ft-FtPinG0005826700.01.T01	Os-LOC_Os02g38230.1.MSUv7.0	8e-58
20- 3:	Ft-FtPinG0005825700.01.T01	Os-LOC_Os02g38050.1.MSUv7.0	5e-101
20- 4:	Ft-FtPinG0005825500.01.T01	Os-LOC_Os02g38040.1.MSUv7.0	2e-133
20- 5:	Ft-FtPinG0005825200.01.T01	Os-LOC_Os02g37990.1.MSUv7.0	3e-58
## Alignment 21: score=255.0 e_value=1.9e-08 N=6 Ft-Ft1&Os-Chr2 minus
21- 0:	Ft-FtPinG0005490000.01.T01	Os-LOC_Os02g30910.1.MSUv7.0	7e-81
21- 1:	Ft-FtPinG0005486200.01.T01	Os-LOC_Os02g30714.1.MSUv7.0	6e-77
21- 2:	Ft-FtPinG0005485300.01.T01	Os-LOC_Os02g30470.1.MSUv7.0	7e-30
21- 3:	Ft-FtPinG0005483900.01.T01	Os-LOC_Os02g30380.1.MSUv7.0	6e-21
21- 4:	Ft-FtPinG0005483600.01.T01	Os-LOC_Os02g30300.1.MSUv7.0	7e-87
21- 5:	Ft-FtPinG0005483200.01.T01	Os-LOC_Os02g30230.2.MSUv7.0	4e-172
## Alignment 22: score=254.0 e_value=7.2e-09 N=6 Ft-Ft1&Os-Chr2 minus
22- 0:	Ft-FtPinG0000321100.01.T01	Os-LOC_Os02g49340.1.MSUv7.0	6e-17
22- 1:	Ft-FtPinG0000323800.01.T01	Os-LOC_Os02g49310.1.MSUv7.0	0
22- 2:	Ft-FtPinG0000324000.01.T01	Os-LOC_Os02g49180.1.MSUv7.0	4e-85
22- 3:	Ft-FtPinG0001382900.01.T01	Os-LOC_Os02g49080.1.MSUv7.0	7e-143
22- 4:	Ft-FtPinG0001383100.01.T01	Os-LOC_Os02g48990.1.MSUv7.0	0
22- 5:	Ft-FtPinG0001383900.01.T01	Os-LOC_Os02g48964.1.MSUv7.0	0
## Alignment 23: score=447.0 e_value=3.2e-22 N=10 Ft-Ft1&Os-Chr3 minus
23- 0:	Ft-FtPinG0009270700.01.T01	Os-LOC_Os03g17310.1.MSUv7.0	0
23- 1:	Ft-FtPinG0009270500.01.T01	Os-LOC_Os03g17240.1.MSUv7.0	3e-137
23- 2:	Ft-FtPinG0008428200.01.T01	Os-LOC_Os03g17100.1.MSUv7.0	9e-62
23- 3:	Ft-FtPinG0008430300.01.T01	Os-LOC_Os03g17084.1.MSUv7.0	1e-61
23- 4:	Ft-FtPinG0008430500.01.T01	Os-LOC_Os03g17010.1.MSUv7.0	3e-56
23- 5:	Ft-FtPinG0008431400.01.T01	Os-LOC_Os03g16980.1.MSUv7.0	0
23- 6:	Ft-FtPinG0008432100.01.T01	Os-LOC_Os03g16940.1.MSUv7.0	3e-68
23- 7:	Ft-FtPinG0008433400.01.T01	Os-LOC_Os03g16824.1.MSUv7.0	1e-80
23- 8:	Ft-FtPinG0008434300.01.T01	Os-LOC_Os03g16780.1.MSUv7.0	4e-171
23- 9:	Ft-FtPinG0008435500.01.T01	Os-LOC_Os03g16740.1.MSUv7.0	0
## Alignment 24: score=293.0 e_value=1.2e-08 N=6 Ft-Ft1&Os-Chr3 minus
24- 0:	Ft-FtPinG0000025700.01.T01	Os-LOC_Os03g56430.1.MSUv7.0	1e-21
24- 1:	Ft-FtPinG0000024700.01.T01	Os-LOC_Os03g56420.1.MSUv7.0	2e-94
24- 2:	Ft-FtPinG0000024100.01.T01	Os-LOC_Os03g56390.1.MSUv7.0	0
24- 3:	Ft-FtPinG0000023900.01.T01	Os-LOC_Os03g56380.1.MSUv7.0	0
24- 4:	Ft-FtPinG0000023800.01.T01	Os-LOC_Os03g56370.1.MSUv7.0	2e-124
24- 5:	Ft-FtPinG0000022700.01.T01	Os-LOC_Os03g56320.2.MSUv7.0	9e-55
## Alignment 25: score=257.0 e_value=3.3e-09 N=6 Ft-Ft1&Os-Chr3 minus
25- 0:	Ft-FtPinG0005753100.01.T01	Os-LOC_Os03g21960.1.MSUv7.0	0
25- 1:	Ft-FtPinG0004830500.01.T01	Os-LOC_Os03g21780.1.MSUv7.0	4e-81
25- 2:	Ft-FtPinG0004830300.01.T01	Os-LOC_Os03g21730.1.MSUv7.0	0
25- 3:	Ft-FtPinG0004829300.01.T01	Os-LOC_Os03g21690.1.MSUv7.0	0
25- 4:	Ft-FtPinG0004828600.01.T01	Os-LOC_Os03g21620.1.MSUv7.0	0
25- 5:	Ft-FtPinG0004827100.01.T01	Os-LOC_Os03g21540.1.MSUv7.0	0
## Alignment 26: score=251.0 e_value=3e-08 N=6 Ft-Ft1&Os-Chr3 minus
26- 0:	Ft-FtPinG0008410200.01.T01	Os-LOC_Os03g59540.1.MSUv7.0	1e-62
26- 1:	Ft-FtPinG0000434000.01.T01	Os-LOC_Os03g59240.1.MSUv7.0	0
26- 2:	Ft-FtPinG0007148500.01.T01	Os-LOC_Os03g59170.1.MSUv7.0	4e-56
26- 3:	Ft-FtPinG0007147500.01.T01	Os-LOC_Os03g59100.1.MSUv7.0	6e-71
26- 4:	Ft-FtPinG0000364600.01.T01	Os-LOC_Os03g59060.2.MSUv7.0	0
26- 5:	Ft-FtPinG0000365800.01.T01	Os-LOC_Os03g58940.1.MSUv7.0	5e-31
## Alignment 27: score=251.0 e_value=7e-10 N=6 Ft-Ft1&Os-Chr3 minus
27- 0:	Ft-FtPinG0001015300.01.T01	Os-LOC_Os03g22040.1.MSUv7.0	5e-104
27- 1:	Ft-FtPinG0001019600.01.T01	Os-LOC_Os03g21850.1.MSUv7.0	2e-134
27- 2:	Ft-FtPinG0001023600.01.T01	Os-LOC_Os03g21730.1.MSUv7.0	0
27- 3:	Ft-FtPinG0001023800.01.T01	Os-LOC_Os03g21720.1.MSUv7.0	0
27- 4:	Ft-FtPinG0001025800.01.T01	Os-LOC_Os03g21550.1.MSUv7.0	5e-68
27- 5:	Ft-FtPinG0001026100.01.T01	Os-LOC_Os03g21540.1.MSUv7.0	0
## Alignment 28: score=281.0 e_value=2.1e-08 N=6 Ft-Ft1&Os-Chr4 plus
28- 0:	Ft-FtPinG0002562100.01.T01	Os-LOC_Os04g58160.1.MSUv7.0	3e-60
28- 1:	Ft-FtPinG0002562300.01.T01	Os-LOC_Os04g58180.1.MSUv7.0	0
28- 2:	Ft-FtPinG0002562700.01.T01	Os-LOC_Os04g58200.1.MSUv7.0	0
28- 3:	Ft-FtPinG0002562900.01.T01	Os-LOC_Os04g58310.1.MSUv7.0	4e-15
28- 4:	Ft-FtPinG0002564300.01.T01	Os-LOC_Os04g58420.1.MSUv7.0	4e-103
28- 5:	Ft-FtPinG0002564600.01.T01	Os-LOC_Os04g58470.1.MSUv7.0	0
## Alignment 29: score=278.0 e_value=2.9e-08 N=6 Ft-Ft1&Os-Chr4 plus
29- 0:	Ft-FtPinG0008015300.01.T01	Os-LOC_Os04g33450.1.MSUv7.0	2e-49
29- 1:	Ft-FtPinG0008014900.01.T01	Os-LOC_Os04g33460.1.MSUv7.0	3e-82
29- 2:	Ft-FtPinG0008012700.01.T01	Os-LOC_Os04g33530.1.MSUv7.0	0
29- 3:	Ft-FtPinG0008012600.01.T01	Os-LOC_Os04g33570.1.MSUv7.0	5e-94
29- 4:	Ft-FtPinG0008012000.01.T01	Os-LOC_Os04g33590.1.MSUv7.0	7e-148
29- 5:	Ft-FtPinG0006313500.01.T01	Os-LOC_Os04g33610.1.MSUv7.0	2e-24
## Alignment 30: score=277.0 e_value=6.3e-08 N=6 Ft-Ft1&Os-Chr4 plus
30- 0:	Ft-FtPinG0002467400.01.T01	Os-LOC_Os04g33770.1.MSUv7.0	8e-163
30- 1:	Ft-FtPinG0002466400.01.T01	Os-LOC_Os04g33860.1.MSUv7.0	8e-19
30- 2:	Ft-FtPinG0002465900.01.T01	Os-LOC_Os04g33950.1.MSUv7.0	2e-100
30- 3:	Ft-FtPinG0002465300.01.T01	Os-LOC_Os04g33990.1.MSUv7.0	1e-54
30- 4:	Ft-FtPinG0002464700.01.T01	Os-LOC_Os04g34010.1.MSUv7.0	2e-118
30- 5:	Ft-FtPinG0002464000.01.T01	Os-LOC_Os04g34030.1.MSUv7.0	9e-48
## Alignment 31: score=272.0 e_value=4.9e-11 N=6 Ft-Ft1&Os-Chr4 plus
31- 0:	Ft-FtPinG0001630700.01.T01	Os-LOC_Os04g16722.1.MSUv7.0	1e-15
31- 1:	Ft-FtPinG0005358400.01.T01	Os-LOC_Os04g16742.1.MSUv7.0	0
31- 2:	Ft-FtPinG0007916700.01.T01	Os-LOC_Os04g16822.1.MSUv7.0	2e-16
31- 3:	Ft-FtPinG0007916900.01.T01	Os-LOC_Os04g16824.1.MSUv7.0	5e-90
31- 4:	Ft-FtPinG0007917300.01.T01	Os-LOC_Os04g16834.1.MSUv7.0	1e-28
31- 5:	Ft-FtPinG0008817400.01.T01	Os-LOC_Os04g16842.1.MSUv7.0	3e-83
## Alignment 32: score=455.0 e_value=5.8e-22 N=11 Ft-Ft1&Os-Chr4 minus
32- 0:	Ft-FtPinG0000133900.01.T01	Os-LOC_Os04g41250.1.MSUv7.0	0
32- 1:	Ft-FtPinG0000135000.01.T01	Os-LOC_Os04g41100.4.MSUv7.0	0
32- 2:	Ft-FtPinG0000136000.01.T02	Os-LOC_Os04g40950.1.MSUv7.0	0
32- 3:	Ft-FtPinG0000137900.01.T01	Os-LOC_Os04g40860.1.MSUv7.0	0
32- 4:	Ft-FtPinG0000141100.01.T01	Os-LOC_Os04g40730.1.MSUv7.0	1e-26
32- 5:	Ft-FtPinG0000143500.01.T01	Os-LOC_Os04g40560.1.MSUv7.0	3e-36
32- 6:	Ft-FtPinG0000145400.01.T02	Os-LOC_Os04g40490.1.MSUv7.0	0
32- 7:	Ft-FtPinG0000149500.01.T01	Os-LOC_Os04g40400.1.MSUv7.0	2e-82
32- 8:	Ft-FtPinG0000150400.01.T01	Os-LOC_Os04g40150.1.MSUv7.0	0
32- 9:	Ft-FtPinG0000150500.01.T01	Os-LOC_Os04g40100.1.MSUv7.0	3e-158
32- 10:	Ft-FtPinG0000151000.01.T01	Os-LOC_Os04g40080.1.MSUv7.0	2e-110
## Alignment 33: score=271.0 e_value=7.4e-09 N=6 Ft-Ft1&Os-Chr4 minus
33- 0:	Ft-FtPinG0003161400.01.T01	Os-LOC_Os04g34030.1.MSUv7.0	2e-57
33- 1:	Ft-FtPinG0003160200.01.T01	Os-LOC_Os04g34010.1.MSUv7.0	5e-124
33- 2:	Ft-FtPinG0003157700.01.T01	Os-LOC_Os04g33860.1.MSUv7.0	1e-23
33- 3:	Ft-FtPinG0003155900.01.T01	Os-LOC_Os04g33830.1.MSUv7.0	3e-56
33- 4:	Ft-FtPinG0003155500.01.T01	Os-LOC_Os04g33780.1.MSUv7.0	3e-171
33- 5:	Ft-FtPinG0003155400.01.T01	Os-LOC_Os04g33760.1.MSUv7.0	5e-23
## Alignment 34: score=354.0 e_value=4.6e-14 N=8 Ft-Ft1&Os-Chr5 plus
34- 0:	Ft-FtPinG0001013000.01.T01	Os-LOC_Os05g39730.1.MSUv7.0	5e-179
34- 1:	Ft-FtPinG0001014900.01.T01	Os-LOC_Os05g39760.1.MSUv7.0	5e-130
34- 2:	Ft-FtPinG0001015300.01.T01	Os-LOC_Os05g39840.1.MSUv7.0	1e-77
34- 3:	Ft-FtPinG0001018900.01.T01	Os-LOC_Os05g39950.1.MSUv7.0	7e-24
34- 4:	Ft-FtPinG0001020400.01.T01	Os-LOC_Os05g39960.1.MSUv7.0	5e-53
34- 5:	Ft-FtPinG0001023300.01.T01	Os-LOC_Os05g40040.1.MSUv7.0	3e-14
34- 6:	Ft-FtPinG0001023600.01.T01	Os-LOC_Os05g40050.1.MSUv7.0	0
34- 7:	Ft-FtPinG0001025500.01.T02	Os-LOC_Os05g40180.1.MSUv7.0	0
## Alignment 35: score=296.0 e_value=3.8e-11 N=7 Ft-Ft1&Os-Chr5 plus
35- 0:	Ft-FtPinG0005754400.01.T01	Os-LOC_Os05g39690.1.MSUv7.0	5e-24
35- 1:	Ft-FtPinG0005753100.01.T01	Os-LOC_Os05g39770.1.MSUv7.0	0
35- 2:	Ft-FtPinG0005751400.01.T01	Os-LOC_Os05g39930.1.MSUv7.0	8e-168
35- 3:	Ft-FtPinG0005750800.01.T01	Os-LOC_Os05g39950.1.MSUv7.0	3e-23
35- 4:	Ft-FtPinG0004830300.01.T01	Os-LOC_Os05g40050.1.MSUv7.0	0
35- 5:	Ft-FtPinG0004828000.01.T01	Os-LOC_Os05g40200.1.MSUv7.0	0
35- 6:	Ft-FtPinG0004826800.01.T01	Os-LOC_Os05g40300.2.MSUv7.0	1e-27
## Alignment 36: score=252.0 e_value=3.6e-08 N=6 Ft-Ft1&Os-Chr7 plus
36- 0:	Ft-FtPinG0001029000.01.T01	Os-LOC_Os07g39560.3.MSUv7.0	2e-54
36- 1:	Ft-FtPinG0001030000.01.T01	Os-LOC_Os07g39700.1.MSUv7.0	3e-47
36- 2:	Ft-FtPinG0001033300.01.T01	Os-LOC_Os07g39900.1.MSUv7.0	2e-111
36- 3:	Ft-FtPinG0001033800.01.T01	Os-LOC_Os07g39940.1.MSUv7.0	2e-47
36- 4:	Ft-FtPinG0001034500.01.T01	Os-LOC_Os07g40000.1.MSUv7.0	4e-50
36- 5:	Ft-FtPinG0001037400.01.T01	Os-LOC_Os07g40150.1.MSUv7.0	9e-120
## Alignment 37: score=251.0 e_value=2.4e-09 N=6 Ft-Ft1&Os-Chr7 plus
37- 0:	Ft-FtPinG0002555600.01.T01	Os-LOC_Os07g37310.1.MSUv7.0	5e-80
37- 1:	Ft-FtPinG0002556200.01.T01	Os-LOC_Os07g37560.1.MSUv7.0	0
37- 2:	Ft-FtPinG0002556700.01.T01	Os-LOC_Os07g37570.1.MSUv7.0	2e-17
37- 3:	Ft-FtPinG0002558400.01.T02	Os-LOC_Os07g37620.1.MSUv7.0	3e-47
37- 4:	Ft-FtPinG0002558600.01.T01	Os-LOC_Os07g37650.1.MSUv7.0	9e-138
37- 5:	Ft-FtPinG0002560000.01.T01	Os-LOC_Os07g37920.1.MSUv7.0	8e-91
## Alignment 38: score=304.0 e_value=6e-12 N=7 Ft-Ft1&Os-Chr7 minus
38- 0:	Ft-FtPinG0001921300.01.T01	Os-LOC_Os07g08430.1.MSUv7.0	2e-135
38- 1:	Ft-FtPinG0001923800.01.T01	Os-LOC_Os07g08190.1.MSUv7.0	1e-91
38- 2:	Ft-FtPinG0001924400.01.T01	Os-LOC_Os07g08140.1.MSUv7.0	4e-109
38- 3:	Ft-FtPinG0001925900.01.T01	Os-LOC_Os07g08070.1.MSUv7.0	2e-115
38- 4:	Ft-FtPinG0001926200.01.T01	Os-LOC_Os07g08000.1.MSUv7.0	0
38- 5:	Ft-FtPinG0001927700.01.T01	Os-LOC_Os07g07950.2.MSUv7.0	0
38- 6:	Ft-FtPinG0007832400.01.T01	Os-LOC_Os07g07930.1.MSUv7.0	2e-34
## Alignment 39: score=439.0 e_value=4.9e-20 N=10 Ft-Ft1&Os-Chr8 plus
39- 0:	Ft-FtPinG0000317900.01.T01	Os-LOC_Os08g38270.1.MSUv7.0	1e-49
39- 1:	Ft-FtPinG0000318900.01.T01	Os-LOC_Os08g38310.1.MSUv7.0	9e-16
39- 2:	Ft-FtPinG0000323800.01.T01	Os-LOC_Os08g38320.2.MSUv7.0	0
39- 3:	Ft-FtPinG0000325000.01.T01	Os-LOC_Os08g38410.1.MSUv7.0	7e-78
39- 4:	Ft-FtPinG0001379800.01.T01	Os-LOC_Os08g38560.1.MSUv7.0	0
39- 5:	Ft-FtPinG0001380200.01.T01	Os-LOC_Os08g38580.1.MSUv7.0	6e-49
39- 6:	Ft-FtPinG0001380800.01.T01	Os-LOC_Os08g38700.1.MSUv7.0	3e-105
39- 7:	Ft-FtPinG0001381700.01.T01	Os-LOC_Os08g38720.1.MSUv7.0	0
39- 8:	Ft-FtPinG0001383100.01.T01	Os-LOC_Os08g38850.2.MSUv7.0	2e-179
39- 9:	Ft-FtPinG0001383900.01.T01	Os-LOC_Os08g38880.1.MSUv7.0	0
## Alignment 40: score=315.0 e_value=1.6e-12 N=7 Ft-Ft1&Os-Chr8 plus
40- 0:	Ft-FtPinG0002955800.01.T01	Os-LOC_Os08g39450.1.MSUv7.0	2e-31
40- 1:	Ft-FtPinG0002954800.01.T01	Os-LOC_Os08g39460.1.MSUv7.0	3e-124
40- 2:	Ft-FtPinG0002954500.01.T01	Os-LOC_Os08g39550.1.MSUv7.0	3e-146
40- 3:	Ft-FtPinG0002953800.01.T01	Os-LOC_Os08g39740.1.MSUv7.0	9e-163
40- 4:	Ft-FtPinG0002953300.01.T01	Os-LOC_Os08g39830.2.MSUv7.0	3e-141
40- 5:	Ft-FtPinG0002952800.01.T01	Os-LOC_Os08g39840.1.MSUv7.0	0
40- 6:	Ft-FtPinG0002950800.01.T01	Os-LOC_Os08g39970.1.MSUv7.0	6e-35
## Alignment 41: score=275.0 e_value=2.5e-08 N=6 Ft-Ft1&Os-Chr9 plus
41- 0:	Ft-FtPinG0009766800.01.T01	Os-LOC_Os09g28200.1.MSUv7.0	5e-52
41- 1:	Ft-FtPinG0009766600.01.T01	Os-LOC_Os09g28210.1.MSUv7.0	2e-42
41- 2:	Ft-FtPinG0009765900.01.T01	Os-LOC_Os09g28300.1.MSUv7.0	1e-83
41- 3:	Ft-FtPinG0009765500.01.T01	Os-LOC_Os09g28310.1.MSUv7.0	3e-37
41- 4:	Ft-FtPinG0005495300.01.T01	Os-LOC_Os09g28450.1.MSUv7.0	7e-90
41- 5:	Ft-FtPinG0005494700.01.T01	Os-LOC_Os09g28550.1.MSUv7.0	5e-12
## Alignment 42: score=262.0 e_value=2.5e-08 N=6 Ft-Ft1&Os-Chr9 minus
42- 0:	Ft-FtPinG0003199000.01.T01	Os-LOC_Os09g28770.1.MSUv7.0	1e-158
42- 1:	Ft-FtPinG0003198400.01.T01	Os-LOC_Os09g28560.1.MSUv7.0	0
42- 2:	Ft-FtPinG0003198200.01.T01	Os-LOC_Os09g28550.1.MSUv7.0	6e-12
42- 3:	Ft-FtPinG0003197500.01.T01	Os-LOC_Os09g28400.1.MSUv7.0	3e-87
42- 4:	Ft-FtPinG0003196900.01.T01	Os-LOC_Os09g28390.1.MSUv7.0	0
42- 5:	Ft-FtPinG0003196200.01.T01	Os-LOC_Os09g28310.1.MSUv7.0	2e-32
## Alignment 43: score=280.0 e_value=4.1e-09 N=6 Ft-Ft3&Os-Chr1 plus
43- 0:	Ft-FtPinG0004051600.01.T01	Os-LOC_Os01g13700.1.MSUv7.0	8e-69
43- 1:	Ft-FtPinG0004051300.01.T01	Os-LOC_Os01g13720.1.MSUv7.0	3e-11
43- 2:	Ft-FtPinG0004050500.01.T01	Os-LOC_Os01g13740.1.MSUv7.0	2e-62
43- 3:	Ft-FtPinG0004050400.01.T01	Os-LOC_Os01g13760.1.MSUv7.0	6e-150
43- 4:	Ft-FtPinG0004049700.01.T01	Os-LOC_Os01g13950.1.MSUv7.0	5e-30
43- 5:	Ft-FtPinG0004049200.01.T01	Os-LOC_Os01g14020.1.MSUv7.0	1e-66
## Alignment 44: score=254.0 e_value=1.5e-10 N=6 Ft-Ft3&Os-Chr1 plus
44- 0:	Ft-FtPinG0007467300.01.T01	Os-LOC_Os01g18670.1.MSUv7.0	0
44- 1:	Ft-FtPinG0007464600.01.T01	Os-LOC_Os01g18850.1.MSUv7.0	9e-140
44- 2:	Ft-FtPinG0007464100.01.T01	Os-LOC_Os01g18860.1.MSUv7.0	0
44- 3:	Ft-FtPinG0007463100.01.T01	Os-LOC_Os01g19120.1.MSUv7.0	2e-31
44- 4:	Ft-FtPinG0007460900.01.T01	Os-LOC_Os01g19390.1.MSUv7.0	1e-127
44- 5:	Ft-FtPinG0007460700.01.T01	Os-LOC_Os01g19410.3.MSUv7.0	4e-18
## Alignment 45: score=250.0 e_value=2.8e-09 N=6 Ft-Ft3&Os-Chr1 plus
45- 0:	Ft-FtPinG0000399000.01.T01	Os-LOC_Os01g19130.1.MSUv7.0	2e-145
45- 1:	Ft-FtPinG0000399100.01.T02	Os-LOC_Os01g19150.2.MSUv7.0	0
45- 2:	Ft-FtPinG0000404200.01.T01	Os-LOC_Os01g19470.1.MSUv7.0	0
45- 3:	Ft-FtPinG0000404800.01.T01	Os-LOC_Os01g19490.1.MSUv7.0	9e-116
45- 4:	Ft-FtPinG0000408000.01.T01	Os-LOC_Os01g19800.1.MSUv7.0	4e-49
45- 5:	Ft-FtPinG0000408500.01.T01	Os-LOC_Os01g19880.1.MSUv7.0	2e-17
## Alignment 46: score=305.0 e_value=8.6e-12 N=7 Ft-Ft3&Os-Chr1 minus
46- 0:	Ft-FtPinG0005142700.01.T01	Os-LOC_Os01g08320.1.MSUv7.0	9e-59
46- 1:	Ft-FtPinG0008136600.01.T01	Os-LOC_Os01g08270.1.MSUv7.0	1e-91
46- 2:	Ft-FtPinG0008134700.01.T01	Os-LOC_Os01g08260.1.MSUv7.0	5e-28
46- 3:	Ft-FtPinG0008563300.01.T01	Os-LOC_Os01g08020.1.MSUv7.0	0
46- 4:	Ft-FtPinG0008565100.01.T01	Os-LOC_Os01g07960.3.MSUv7.0	3e-127
46- 5:	Ft-FtPinG0008565400.01.T01	Os-LOC_Os01g07850.1.MSUv7.0	3e-70
46- 6:	Ft-FtPinG0008566500.01.T01	Os-LOC_Os01g07750.1.MSUv7.0	4e-37
## Alignment 47: score=299.0 e_value=1.8e-13 N=7 Ft-Ft3&Os-Chr1 minus
47- 0:	Ft-FtPinG0008231400.01.T01	Os-LOC_Os01g60230.3.MSUv7.0	2e-69
47- 1:	Ft-FtPinG0002917400.01.T01	Os-LOC_Os01g59980.1.MSUv7.0	2e-58
47- 2:	Ft-FtPinG0002916600.01.T01	Os-LOC_Os01g59930.1.MSUv7.0	5e-158
47- 3:	Ft-FtPinG0001825400.01.T01	Os-LOC_Os01g59920.1.MSUv7.0	3e-161
47- 4:	Ft-FtPinG0001824300.01.T01	Os-LOC_Os01g59910.1.MSUv7.0	4e-57
47- 5:	Ft-FtPinG0001823700.01.T01	Os-LOC_Os01g59850.1.MSUv7.0	8e-107
47- 6:	Ft-FtPinG0001819700.01.T01	Os-LOC_Os01g59670.1.MSUv7.0	4e-66
## Alignment 48: score=281.0 e_value=1.6e-11 N=7 Ft-Ft3&Os-Chr10 plus
48- 0:	Ft-FtPinG0001733500.01.T01	Os-LOC_Os10g27480.1.MSUv7.0	1e-18
48- 1:	Ft-FtPinG0001731600.01.T01	Os-LOC_Os10g28230.1.MSUv7.0	1e-72
48- 2:	Ft-FtPinG0001727900.01.T01	Os-LOC_Os10g28340.1.MSUv7.0	8e-100
48- 3:	Ft-FtPinG0001726700.01.T01	Os-LOC_Os10g28610.1.MSUv7.0	2e-23
48- 4:	Ft-FtPinG0001725800.01.T01	Os-LOC_Os10g28640.1.MSUv7.0	4e-31
48- 5:	Ft-FtPinG0001725200.01.T01	Os-LOC_Os10g28660.1.MSUv7.0	0
48- 6:	Ft-FtPinG0001722200.01.T01	Os-LOC_Os10g28680.1.MSUv7.0	1e-24
## Alignment 49: score=432.0 e_value=9.9e-24 N=11 Ft-Ft3&Os-Chr10 minus
49- 0:	Ft-FtPinG0000899300.01.T01	Os-LOC_Os10g42960.1.MSUv7.0	0
49- 1:	Ft-FtPinG0000897500.01.T01	Os-LOC_Os10g42750.1.MSUv7.0	2e-41
49- 2:	Ft-FtPinG0000896000.01.T01	Os-LOC_Os10g42710.1.MSUv7.0	5e-74
49- 3:	Ft-FtPinG0000894700.01.T01	Os-LOC_Os10g42690.1.MSUv7.0	0
49- 4:	Ft-FtPinG0008631700.01.T01	Os-LOC_Os10g42620.1.MSUv7.0	1e-91
49- 5:	Ft-FtPinG0005226000.01.T01	Os-LOC_Os10g42420.1.MSUv7.0	3e-180
49- 6:	Ft-FtPinG0008672400.01.T01	Os-LOC_Os10g42299.4.MSUv7.0	3e-147
49- 7:	Ft-FtPinG0008675700.01.T01	Os-LOC_Os10g42180.1.MSUv7.0	0
49- 8:	Ft-FtPinG0008676000.01.T01	Os-LOC_Os10g42130.1.MSUv7.0	1e-86
49- 9:	Ft-FtPinG0006783500.01.T01	Os-LOC_Os10g42100.1.MSUv7.0	0
49- 10:	Ft-FtPinG0006785200.01.T01	Os-LOC_Os10g41820.2.MSUv7.0	0
## Alignment 50: score=298.0 e_value=2.8e-10 N=7 Ft-Ft3&Os-Chr2 plus
50- 0:	Ft-FtPinG0005953200.01.T01	Os-LOC_Os02g52160.1.MSUv7.0	0
50- 1:	Ft-FtPinG0005952600.01.T01	Os-LOC_Os02g52210.1.MSUv7.0	9e-29
50- 2:	Ft-FtPinG0005951000.01.T01	Os-LOC_Os02g52260.1.MSUv7.0	3e-20
50- 3:	Ft-FtPinG0005950000.01.T01	Os-LOC_Os02g52340.1.MSUv7.0	1e-76
50- 4:	Ft-FtPinG0005948400.01.T01	Os-LOC_Os02g52550.1.MSUv7.0	1e-57
50- 5:	Ft-FtPinG0005948000.01.T01	Os-LOC_Os02g52670.1.MSUv7.0	6e-17
50- 6:	Ft-FtPinG0005946800.01.T01	Os-LOC_Os02g52810.1.MSUv7.0	5e-38
## Alignment 51: score=285.0 e_value=7.6e-08 N=6 Ft-Ft3&Os-Chr2 plus
51- 0:	Ft-FtPinG0009618300.01.T01	Os-LOC_Os02g51570.1.MSUv7.0	2e-73
51- 1:	Ft-FtPinG0001756900.01.T01	Os-LOC_Os02g51640.1.MSUv7.0	4e-17
51- 2:	Ft-FtPinG0001757700.01.T01	Os-LOC_Os02g51670.1.MSUv7.0	4e-53
51- 3:	Ft-FtPinG0001757900.01.T01	Os-LOC_Os02g51680.1.MSUv7.0	3e-147
51- 4:	Ft-FtPinG0008504600.01.T01	Os-LOC_Os02g51730.1.MSUv7.0	4e-159
51- 5:	Ft-FtPinG0007153100.01.T01	Os-LOC_Os02g51750.1.MSUv7.0	6e-143
## Alignment 52: score=324.0 e_value=1.9e-14 N=8 Ft-Ft3&Os-Chr2 minus
52- 0:	Ft-FtPinG0006262700.01.T01	Os-LOC_Os02g47420.3.MSUv7.0	2e-164
52- 1:	Ft-FtPinG0006766300.01.T01	Os-LOC_Os02g47230.1.MSUv7.0	3e-87
52- 2:	Ft-FtPinG0000898800.01.T01	Os-LOC_Os02g47000.1.MSUv7.0	1e-43
52- 3:	Ft-FtPinG0000894900.01.T01	Os-LOC_Os02g46940.1.MSUv7.0	6e-46
52- 4:	Ft-FtPinG0000894700.01.T01	Os-LOC_Os02g46930.1.MSUv7.0	2e-82
52- 5:	Ft-FtPinG0008629700.01.T01	Os-LOC_Os02g46680.1.MSUv7.0	3e-157
52- 6:	Ft-FtPinG0008630900.01.T01	Os-LOC_Os02g46660.1.MSUv7.0	2e-133
52- 7:	Ft-FtPinG0008632100.01.T01	Os-LOC_Os02g46560.1.MSUv7.0	1e-66
## Alignment 53: score=318.0 e_value=1.3e-10 N=7 Ft-Ft3&Os-Chr2 minus
53- 0:	Ft-FtPinG0009115200.01.T01	Os-LOC_Os02g38480.1.MSUv7.0	1e-83
53- 1:	Ft-FtPinG0009114000.01.T01	Os-LOC_Os02g38440.1.MSUv7.0	1e-134
53- 2:	Ft-FtPinG0009112700.01.T01	Os-LOC_Os02g38340.1.MSUv7.0	0
53- 3:	Ft-FtPinG0009112200.01.T01	Os-LOC_Os02g38290.1.MSUv7.0	0
53- 4:	Ft-FtPinG0009111200.01.T01	Os-LOC_Os02g38220.1.MSUv7.0	1e-103
53- 5:	Ft-FtPinG0009110600.01.T01	Os-LOC_Os02g38120.1.MSUv7.0	8e-179
53- 6:	Ft-FtPinG0009110300.01.T01	Os-LOC_Os02g38040.1.MSUv7.0	5e-80
## Alignment 54: score=252.0 e_value=1e-08 N=6 Ft-Ft3&Os-Chr2 minus
54- 0:	Ft-FtPinG0000766300.01.T01	Os-LOC_Os02g02920.1.MSUv7.0	1e-74
54- 1:	Ft-FtPinG0000767900.01.T01	Os-LOC_Os02g02890.1.MSUv7.0	1e-103
54- 2:	Ft-FtPinG0000770900.01.T02	Os-LOC_Os02g02840.1.MSUv7.0	2e-127
54- 3:	Ft-FtPinG0000772200.01.T01	Os-LOC_Os02g02810.1.MSUv7.0	3e-89
54- 4:	Ft-FtPinG0000777800.01.T01	Os-LOC_Os02g02600.1.MSUv7.0	8e-143
54- 5:	Ft-FtPinG0000778500.01.T01	Os-LOC_Os02g02524.1.MSUv7.0	3e-58
## Alignment 55: score=300.0 e_value=1.7e-10 N=7 Ft-Ft3&Os-Chr3 plus
55- 0:	Ft-FtPinG0001732900.01.T02	Os-LOC_Os03g53050.1.MSUv7.0	3e-93
55- 1:	Ft-FtPinG0001732500.01.T01	Os-LOC_Os03g53110.1.MSUv7.0	4e-176
55- 2:	Ft-FtPinG0001731600.01.T01	Os-LOC_Os03g53190.2.MSUv7.0	2e-77
55- 3:	Ft-FtPinG0001729300.01.T01	Os-LOC_Os03g53270.1.MSUv7.0	1e-109
55- 4:	Ft-FtPinG0001727900.01.T01	Os-LOC_Os03g53340.2.MSUv7.0	1e-88
55- 5:	Ft-FtPinG0001727400.01.T01	Os-LOC_Os03g53400.1.MSUv7.0	1e-124
55- 6:	Ft-FtPinG0001721200.01.T01	Os-LOC_Os03g53610.1.MSUv7.0	7e-34
## Alignment 56: score=261.0 e_value=9.5e-09 N=6 Ft-Ft3&Os-Chr3 plus
56- 0:	Ft-FtPinG0002401500.01.T01	Os-LOC_Os03g57330.1.MSUv7.0	2e-78
56- 1:	Ft-FtPinG0002401400.01.T01	Os-LOC_Os03g57340.1.MSUv7.0	0
56- 2:	Ft-FtPinG0002400700.01.T01	Os-LOC_Os03g57460.1.MSUv7.0	0
56- 3:	Ft-FtPinG0002399300.01.T01	Os-LOC_Os03g57500.1.MSUv7.0	7e-116
56- 4:	Ft-FtPinG0002398100.01.T01	Os-LOC_Os03g57680.1.MSUv7.0	0
56- 5:	Ft-FtPinG0002396400.01.T01	Os-LOC_Os03g57854.1.MSUv7.0	0
## Alignment 57: score=255.0 e_value=1.9e-12 N=6 Ft-Ft3&Os-Chr3 plus
57- 0:	Ft-FtPinG0001725200.01.T01	Os-LOC_Os03g57950.1.MSUv7.0	0
57- 1:	Ft-FtPinG0001724500.01.T01	Os-LOC_Os03g57960.1.MSUv7.0	4e-65
57- 2:	Ft-FtPinG0001723900.01.T01	Os-LOC_Os03g57980.1.MSUv7.0	5e-24
57- 3:	Ft-FtPinG0001723800.01.T01	Os-LOC_Os03g57990.1.MSUv7.0	6e-13
57- 4:	Ft-FtPinG0001719000.01.T01	Os-LOC_Os03g58070.1.MSUv7.0	3e-41
57- 5:	Ft-FtPinG0001712500.01.T01	Os-LOC_Os03g58230.1.MSUv7.0	6e-30
## Alignment 58: score=289.0 e_value=2.5e-11 N=7 Ft-Ft3&Os-Chr3 minus
58- 0:	Ft-FtPinG0001733500.01.T01	Os-LOC_Os03g06890.1.MSUv7.0	7e-17
58- 1:	Ft-FtPinG0001731600.01.T01	Os-LOC_Os03g06670.1.MSUv7.0	1e-72
58- 2:	Ft-FtPinG0001727900.01.T01	Os-LOC_Os03g06630.1.MSUv7.0	1e-96
58- 3:	Ft-FtPinG0001726700.01.T01	Os-LOC_Os03g06510.1.MSUv7.0	4e-23
58- 4:	Ft-FtPinG0001725200.01.T01	Os-LOC_Os03g06460.1.MSUv7.0	0
58- 5:	Ft-FtPinG0001721200.01.T01	Os-LOC_Os03g06360.1.MSUv7.0	2e-39
58- 6:	Ft-FtPinG0001721000.01.T01	Os-LOC_Os03g06350.1.MSUv7.0	6e-23
## Alignment 59: score=259.0 e_value=2.7e-10 N=6 Ft-Ft3&Os-Chr3 minus
59- 0:	Ft-FtPinG0006084400.01.T01	Os-LOC_Os03g55130.2.MSUv7.0	7e-20
59- 1:	Ft-FtPinG0006083600.01.T01	Os-LOC_Os03g55080.1.MSUv7.0	9e-49
59- 2:	Ft-FtPinG0006082900.01.T01	Os-LOC_Os03g55070.1.MSUv7.0	0
59- 3:	Ft-FtPinG0006082000.01.T01	Os-LOC_Os03g54910.1.MSUv7.0	7e-35
59- 4:	Ft-FtPinG0001079400.01.T01	Os-LOC_Os03g54160.1.MSUv7.0	3e-68
59- 5:	Ft-FtPinG0001078300.01.T01	Os-LOC_Os03g54150.1.MSUv7.0	9e-55
## Alignment 60: score=252.0 e_value=5.1e-09 N=6 Ft-Ft3&Os-Chr3 minus
60- 0:	Ft-FtPinG0001733300.01.T01	Os-LOC_Os03g58490.1.MSUv7.0	3e-31
60- 1:	Ft-FtPinG0001731700.01.T01	Os-LOC_Os03g58240.1.MSUv7.0	0
60- 2:	Ft-FtPinG0001729300.01.T01	Os-LOC_Os03g58170.1.MSUv7.0	1e-99
60- 3:	Ft-FtPinG0001727900.01.T01	Os-LOC_Os03g58160.1.MSUv7.0	3e-95
60- 4:	Ft-FtPinG0001727400.01.T01	Os-LOC_Os03g58140.1.MSUv7.0	2e-89
60- 5:	Ft-FtPinG0001723900.01.T01	Os-LOC_Os03g57980.1.MSUv7.0	5e-24
## Alignment 61: score=321.0 e_value=0 N=7 Ft-Ft3&Os-Chr4 minus
61- 0:	Ft-FtPinG0009618600.01.T01	Os-LOC_Os04g17100.1.MSUv7.0	3e-51
61- 1:	Ft-FtPinG0007192500.01.T01	Os-LOC_Os04g16834.1.MSUv7.0	3e-32
61- 2:	Ft-FtPinG0007397900.01.T01	Os-LOC_Os04g16832.1.MSUv7.0	6e-69
61- 3:	Ft-FtPinG0007835300.01.T01	Os-LOC_Os04g16828.1.MSUv7.0	2e-72
61- 4:	Ft-FtPinG0008362100.01.T01	Os-LOC_Os04g16824.1.MSUv7.0	1e-93
61- 5:	Ft-FtPinG0007836500.01.T01	Os-LOC_Os04g16822.1.MSUv7.0	3e-36
61- 6:	Ft-FtPinG0008361900.01.T01	Os-LOC_Os04g16818.1.MSUv7.0	2e-16
## Alignment 62: score=258.0 e_value=7.2e-10 N=6 Ft-Ft3&Os-Chr4 minus
62- 0:	Ft-FtPinG0001781200.01.T01	Os-LOC_Os04g41250.1.MSUv7.0	2e-172
62- 1:	Ft-FtPinG0009117900.01.T01	Os-LOC_Os04g41100.4.MSUv7.0	0
62- 2:	Ft-FtPinG0009117700.01.T01	Os-LOC_Os04g40980.1.MSUv7.0	2e-52
62- 3:	Ft-FtPinG0009117600.01.T01	Os-LOC_Os04g40970.1.MSUv7.0	0
62- 4:	Ft-FtPinG0009116500.01.T01	Os-LOC_Os04g40910.1.MSUv7.0	2e-82
62- 5:	Ft-FtPinG0009114000.01.T01	Os-LOC_Os04g40730.1.MSUv7.0	7e-134
## Alignment 63: score=384.0 e_value=3.7e-18 N=9 Ft-Ft3&Os-Chr7 minus
63- 0:	Ft-FtPinG0001731700.01.T01	Os-LOC_Os07g08400.1.MSUv7.0	0
63- 1:	Ft-FtPinG0001730400.01.T01	Os-LOC_Os07g08200.1.MSUv7.0	2e-171
63- 2:	Ft-FtPinG0001727900.01.T01	Os-LOC_Os07g08140.1.MSUv7.0	1e-96
63- 3:	Ft-FtPinG0001727400.01.T01	Os-LOC_Os07g08070.1.MSUv7.0	5e-116
63- 4:	Ft-FtPinG0001725200.01.T01	Os-LOC_Os07g07950.2.MSUv7.0	0
63- 5:	Ft-FtPinG0001723900.01.T01	Os-LOC_Os07g07920.1.MSUv7.0	2e-12
63- 6:	Ft-FtPinG0001723800.01.T01	Os-LOC_Os07g07860.1.MSUv7.0	4e-13
63- 7:	Ft-FtPinG0001723600.01.T01	Os-LOC_Os07g07790.1.MSUv7.0	1e-25
63- 8:	Ft-FtPinG0001719000.01.T01	Os-LOC_Os07g07680.1.MSUv7.0	3e-38
## Alignment 64: score=324.0 e_value=6.1e-11 N=7 Ft-Ft3&Os-Chr8 plus
64- 0:	Ft-FtPinG0004478600.01.T01	Os-LOC_Os08g41280.1.MSUv7.0	1e-116
64- 1:	Ft-FtPinG0004478000.01.T01	Os-LOC_Os08g41300.1.MSUv7.0	1e-87
64- 2:	Ft-FtPinG0004476400.01.T01	Os-LOC_Os08g41320.1.MSUv7.0	2e-24
64- 3:	Ft-FtPinG0004475300.01.T01	Os-LOC_Os08g41390.1.MSUv7.0	1e-157
64- 4:	Ft-FtPinG0004474400.01.T01	Os-LOC_Os08g41410.1.MSUv7.0	8e-154
64- 5:	Ft-FtPinG0004471700.01.T01	Os-LOC_Os08g41480.1.MSUv7.0	6e-22
64- 6:	Ft-FtPinG0004471500.01.T01	Os-LOC_Os08g41500.1.MSUv7.0	3e-85
## Alignment 65: score=311.0 e_value=1.7e-13 N=7 Ft-Ft3&Os-Chr8 plus
65- 0:	Ft-FtPinG0008968100.01.T01	Os-LOC_Os08g40060.1.MSUv7.0	1e-32
65- 1:	Ft-FtPinG0008971800.01.T01	Os-LOC_Os08g40100.1.MSUv7.0	2e-64
65- 2:	Ft-FtPinG0008972000.01.T01	Os-LOC_Os08g40110.2.MSUv7.0	0
65- 3:	Ft-FtPinG0008972300.01.T01	Os-LOC_Os08g40120.1.MSUv7.0	5e-34
65- 4:	Ft-FtPinG0008973700.01.T01	Os-LOC_Os08g40180.1.MSUv7.0	0
65- 5:	Ft-FtPinG0008975600.01.T01	Os-LOC_Os08g40430.1.MSUv7.0	4e-134
65- 6:	Ft-FtPinG0007979900.01.T01	Os-LOC_Os08g40440.1.MSUv7.0	1e-136
## Alignment 66: score=312.0 e_value=1.5e-11 N=7 Ft-Ft3&Os-Chr9 minus
66- 0:	Ft-FtPinG0005954900.01.T01	Os-LOC_Os09g29660.1.MSUv7.0	0
66- 1:	Ft-FtPinG0005953300.01.T01	Os-LOC_Os09g29470.1.MSUv7.0	0
66- 2:	Ft-FtPinG0005952800.01.T01	Os-LOC_Os09g29370.1.MSUv7.0	1e-27
66- 3:	Ft-FtPinG0005952600.01.T01	Os-LOC_Os09g29310.1.MSUv7.0	2e-35
66- 4:	Ft-FtPinG0005952300.01.T01	Os-LOC_Os09g29284.1.MSUv7.0	0
66- 5:	Ft-FtPinG0005951600.01.T01	Os-LOC_Os09g29120.1.MSUv7.0	8e-83
66- 6:	Ft-FtPinG0005951000.01.T01	Os-LOC_Os09g29080.1.MSUv7.0	4e-29
## Alignment 67: score=326.0 e_value=3.5e-14 N=8 Ft-Ft5&Os-Chr1 minus
67- 0:	Ft-FtPinG0000468900.01.T01	Os-LOC_Os01g68330.1.MSUv7.0	4e-159
67- 1:	Ft-FtPinG0000470600.01.T01	Os-LOC_Os01g68260.1.MSUv7.0	0
67- 2:	Ft-FtPinG0000473300.01.T01	Os-LOC_Os01g68090.1.MSUv7.0	2e-12
67- 3:	Ft-FtPinG0000480300.01.T01	Os-LOC_Os01g68060.1.MSUv7.0	0
67- 4:	Ft-FtPinG0000482700.01.T01	Os-LOC_Os01g68030.1.MSUv7.0	2e-26
67- 5:	Ft-FtPinG0000484500.01.T01	Os-LOC_Os01g67770.1.MSUv7.0	2e-133
67- 6:	Ft-FtPinG0000485900.01.T01	Os-LOC_Os01g67580.1.MSUv7.0	0
67- 7:	Ft-FtPinG0000486900.01.T01	Os-LOC_Os01g67560.1.MSUv7.0	2e-68
## Alignment 68: score=252.0 e_value=2.7e-09 N=6 Ft-Ft5&Os-Chr1 minus
68- 0:	Ft-FtPinG0005650500.01.T01	Os-LOC_Os01g72430.1.MSUv7.0	9e-90
68- 1:	Ft-FtPinG0005651100.01.T03	Os-LOC_Os01g72320.1.MSUv7.0	0
68- 2:	Ft-FtPinG0005652100.01.T01	Os-LOC_Os01g72240.1.MSUv7.0	0
68- 3:	Ft-FtPinG0005653400.01.T01	Os-LOC_Os01g72190.1.MSUv7.0	1e-29
68- 4:	Ft-FtPinG0005653800.01.T01	Os-LOC_Os01g72000.1.MSUv7.0	0
68- 5:	Ft-FtPinG0005657300.01.T01	Os-LOC_Os01g71970.1.MSUv7.0	6e-134
## Alignment 69: score=369.0 e_value=2.6e-16 N=8 Ft-Ft5&Os-Chr3 plus
69- 0:	Ft-FtPinG0004683600.01.T01	Os-LOC_Os03g11210.1.MSUv7.0	9e-73
69- 1:	Ft-FtPinG0004684100.01.T01	Os-LOC_Os03g11220.1.MSUv7.0	3e-15
69- 2:	Ft-FtPinG0004684300.01.T01	Os-LOC_Os03g11260.1.MSUv7.0	7e-89
69- 3:	Ft-FtPinG0004684600.01.T01	Os-LOC_Os03g11300.1.MSUv7.0	9e-15
69- 4:	Ft-FtPinG0004684800.01.T01	Os-LOC_Os03g11380.2.MSUv7.0	1e-80
69- 5:	Ft-FtPinG0004685100.01.T01	Os-LOC_Os03g11410.1.MSUv7.0	0
69- 6:	Ft-FtPinG0003142600.01.T01	Os-LOC_Os03g11530.1.MSUv7.0	0
69- 7:	Ft-FtPinG0003141900.01.T01	Os-LOC_Os03g11550.1.MSUv7.0	2e-25
## Alignment 70: score=276.0 e_value=8.6e-10 N=6 Ft-Ft5&Os-Chr4 plus
70- 0:	Ft-FtPinG0000589200.01.T01	Os-LOC_Os04g40650.1.MSUv7.0	2e-79
70- 1:	Ft-FtPinG0000591700.01.T01	Os-LOC_Os04g40700.2.MSUv7.0	0
70- 2:	Ft-FtPinG0000594500.01.T01	Os-LOC_Os04g40870.1.MSUv7.0	4e-64
70- 3:	Ft-FtPinG0000594700.01.T01	Os-LOC_Os04g40874.1.MSUv7.0	7e-125
70- 4:	Ft-FtPinG0000594900.01.T01	Os-LOC_Os04g40910.1.MSUv7.0	7e-57
70- 5:	Ft-FtPinG0000595900.01.T01	Os-LOC_Os04g40950.1.MSUv7.0	0
## Alignment 71: score=453.0 e_value=4.4e-20 N=10 Ft-Ft5&Os-Chr6 minus
71- 0:	Ft-FtPinG0000756900.01.T01	Os-LOC_Os06g43840.1.MSUv7.0	2e-33
71- 1:	Ft-FtPinG0000758500.01.T01	Os-LOC_Os06g43800.1.MSUv7.0	1e-150
71- 2:	Ft-FtPinG0001110600.01.T01	Os-LOC_Os06g43780.1.MSUv7.0	3e-25
71- 3:	Ft-FtPinG0001111200.01.T01	Os-LOC_Os06g43710.1.MSUv7.0	1e-96
71- 4:	Ft-FtPinG0001111300.01.T01	Os-LOC_Os06g43680.1.MSUv7.0	0
71- 5:	Ft-FtPinG0001113400.01.T01	Os-LOC_Os06g43660.1.MSUv7.0	0
71- 6:	Ft-FtPinG0001113900.01.T01	Os-LOC_Os06g43630.1.MSUv7.0	0
71- 7:	Ft-FtPinG0001114500.01.T01	Os-LOC_Os06g43620.1.MSUv7.0	4e-111
71- 8:	Ft-FtPinG0001117100.01.T01	Os-LOC_Os06g43600.2.MSUv7.0	4e-39
71- 9:	Ft-FtPinG0001119600.01.T01	Os-LOC_Os06g43520.1.MSUv7.0	2e-15
## Alignment 72: score=311.0 e_value=7.4e-12 N=7 Ft-Ft5&Os-Chr9 minus
72- 0:	Ft-FtPinG0000941100.01.T01	Os-LOC_Os09g36810.1.MSUv7.0	0
72- 1:	Ft-FtPinG0000941300.01.T01	Os-LOC_Os09g36730.1.MSUv7.0	1e-105
72- 2:	Ft-FtPinG0000941800.01.T01	Os-LOC_Os09g36710.1.MSUv7.0	4e-154
72- 3:	Ft-FtPinG0000942900.01.T01	Os-LOC_Os09g36600.1.MSUv7.0	0
72- 4:	Ft-FtPinG0000943400.01.T01	Os-LOC_Os09g36580.1.MSUv7.0	4e-103
72- 5:	Ft-FtPinG0000943600.01.T01	Os-LOC_Os09g36550.1.MSUv7.0	0
72- 6:	Ft-FtPinG0007429800.01.T01	Os-LOC_Os09g36450.1.MSUv7.0	8e-164
## Alignment 73: score=251.0 e_value=3.2e-11 N=7 Ft-Ft5&Os-ChrSy minus
73- 0:	Ft-FtPinG0008160900.01.T01	Os-ChrSy.fgenesh.mRNA.87.MSUv7.0	0
73- 1:	Ft-FtPinG0000432800.01.T01	Os-ChrSy.fgenesh.mRNA.61.MSUv7.0	7e-54
73- 2:	Ft-FtPinG0000431800.01.T01	Os-ChrSy.fgenesh.mRNA.55.MSUv7.0	2e-12
73- 3:	Ft-FtPinG0005982400.01.T01	Os-ChrSy.fgenesh.mRNA.40.MSUv7.0	1e-28
73- 4:	Ft-FtPinG0009100300.01.T01	Os-ChrSy.fgenesh.mRNA.22.MSUv7.0	7e-28
73- 5:	Ft-FtPinG0007876600.01.T01	Os-ChrSy.fgenesh.mRNA.12.MSUv7.0	4e-31
73- 6:	Ft-FtPinG0008323900.01.T01	Os-ChrSy.fgenesh.mRNA.7.MSUv7.0	3e-14
## Alignment 74: score=275.0 e_value=9.2e-10 N=6 Ft-Ft6&Os-Chr1 plus
74- 0:	Ft-FtPinG0003079000.01.T01	Os-LOC_Os01g17050.1.MSUv7.0	5e-13
74- 1:	Ft-FtPinG0003077900.01.T01	Os-LOC_Os01g17150.1.MSUv7.0	1e-12
74- 2:	Ft-FtPinG0003077500.01.T01	Os-LOC_Os01g17160.1.MSUv7.0	3e-121
74- 3:	Ft-FtPinG0003075100.01.T01	Os-LOC_Os01g17190.1.MSUv7.0	8e-105
74- 4:	Ft-FtPinG0003073300.01.T01	Os-LOC_Os01g17250.1.MSUv7.0	1e-110
74- 5:	Ft-FtPinG0003072900.01.T01	Os-LOC_Os01g17402.1.MSUv7.0	6e-118
## Alignment 75: score=534.0 e_value=1.6e-27 N=12 Ft-Ft6&Os-Chr10 minus
75- 0:	Ft-FtPinG0007568200.01.T01	Os-LOC_Os10g28700.1.MSUv7.0	5e-39
75- 1:	Ft-FtPinG0007568400.01.T01	Os-LOC_Os10g28680.1.MSUv7.0	6e-21
75- 2:	Ft-FtPinG0007569000.01.T01	Os-LOC_Os10g28660.1.MSUv7.0	0
75- 3:	Ft-FtPinG0007569800.01.T01	Os-LOC_Os10g28630.1.MSUv7.0	3e-158
75- 4:	Ft-FtPinG0007571100.01.T01	Os-LOC_Os10g28610.1.MSUv7.0	8e-79
75- 5:	Ft-FtPinG0007572800.01.T01	Os-LOC_Os10g28420.1.MSUv7.0	4e-64
75- 6:	Ft-FtPinG0007572900.01.T01	Os-LOC_Os10g28380.1.MSUv7.0	6e-11
75- 7:	Ft-FtPinG0007574500.01.T01	Os-LOC_Os10g28350.1.MSUv7.0	3e-110
75- 8:	Ft-FtPinG0007574700.01.T01	Os-LOC_Os10g28340.1.MSUv7.0	3e-99
75- 9:	Ft-FtPinG0007577600.01.T01	Os-LOC_Os10g28240.1.MSUv7.0	0
75- 10:	Ft-FtPinG0007579700.01.T01	Os-LOC_Os10g28210.1.MSUv7.0	1e-74
75- 11:	Ft-FtPinG0007582300.01.T01	Os-LOC_Os10g28020.1.MSUv7.0	3e-40
## Alignment 76: score=332.0 e_value=2.1e-10 N=7 Ft-Ft6&Os-Chr12 minus
76- 0:	Ft-FtPinG0007569800.01.T01	Os-LOC_Os12g41390.1.MSUv7.0	8e-157
76- 1:	Ft-FtPinG0007570800.01.T01	Os-LOC_Os12g41260.1.MSUv7.0	1e-152
76- 2:	Ft-FtPinG0007570900.01.T01	Os-LOC_Os12g41230.2.MSUv7.0	3e-93
76- 3:	Ft-FtPinG0007571100.01.T01	Os-LOC_Os12g41200.1.MSUv7.0	6e-63
76- 4:	Ft-FtPinG0007571900.01.T01	Os-LOC_Os12g41190.1.MSUv7.0	2e-163
76- 5:	Ft-FtPinG0007572800.01.T01	Os-LOC_Os12g41160.1.MSUv7.0	4e-33
76- 6:	Ft-FtPinG0007573100.01.T01	Os-LOC_Os12g41140.1.MSUv7.0	3e-87
## Alignment 77: score=339.0 e_value=3e-15 N=8 Ft-Ft6&Os-Chr2 plus
77- 0:	Ft-FtPinG0001479500.01.T01	Os-LOC_Os02g51680.1.MSUv7.0	2e-142
77- 1:	Ft-FtPinG0001479900.01.T01	Os-LOC_Os02g51710.1.MSUv7.0	2e-68
77- 2:	Ft-FtPinG0001484100.01.T01	Os-LOC_Os02g51799.1.MSUv7.0	1e-90
77- 3:	Ft-FtPinG0001485200.01.T01	Os-LOC_Os02g51900.1.MSUv7.0	0
77- 4:	Ft-FtPinG0001485800.01.T02	Os-LOC_Os02g51950.1.MSUv7.0	2e-22
77- 5:	Ft-FtPinG0001485900.01.T01	Os-LOC_Os02g52140.1.MSUv7.0	2e-100
77- 6:	Ft-FtPinG0009089400.01.T02	Os-LOC_Os02g52160.1.MSUv7.0	0
77- 7:	Ft-FtPinG0009087100.01.T01	Os-LOC_Os02g52190.1.MSUv7.0	9e-54
## Alignment 78: score=459.0 e_value=9.5e-21 N=10 Ft-Ft6&Os-Chr3 plus
78- 0:	Ft-FtPinG0007568200.01.T01	Os-LOC_Os03g06430.1.MSUv7.0	1e-27
78- 1:	Ft-FtPinG0007569000.01.T01	Os-LOC_Os03g06460.1.MSUv7.0	0
78- 2:	Ft-FtPinG0007571100.01.T01	Os-LOC_Os03g06510.1.MSUv7.0	1e-78
78- 3:	Ft-FtPinG0007572400.01.T01	Os-LOC_Os03g06520.1.MSUv7.0	0
78- 4:	Ft-FtPinG0007572800.01.T01	Os-LOC_Os03g06570.1.MSUv7.0	3e-58
78- 5:	Ft-FtPinG0007572900.01.T01	Os-LOC_Os03g06580.4.MSUv7.0	3e-18
78- 6:	Ft-FtPinG0007574000.01.T01	Os-LOC_Os03g06610.1.MSUv7.0	5e-33
78- 7:	Ft-FtPinG0007574500.01.T01	Os-LOC_Os03g06620.1.MSUv7.0	2e-112
78- 8:	Ft-FtPinG0007574700.01.T01	Os-LOC_Os03g06630.1.MSUv7.0	9e-92
78- 9:	Ft-FtPinG0007579700.01.T01	Os-LOC_Os03g06680.1.MSUv7.0	8e-76
## Alignment 79: score=431.0 e_value=1.5e-19 N=10 Ft-Ft6&Os-Chr3 plus
79- 0:	Ft-FtPinG0007569000.01.T01	Os-LOC_Os03g57950.1.MSUv7.0	0
79- 1:	Ft-FtPinG0007570300.01.T01	Os-LOC_Os03g57970.2.MSUv7.0	2e-21
79- 2:	Ft-FtPinG0007571800.01.T01	Os-LOC_Os03g58110.1.MSUv7.0	4e-134
79- 3:	Ft-FtPinG0007573400.01.T01	Os-LOC_Os03g58140.1.MSUv7.0	8e-81
79- 4:	Ft-FtPinG0007574700.01.T01	Os-LOC_Os03g58160.1.MSUv7.0	6e-103
79- 5:	Ft-FtPinG0007575900.01.T01	Os-LOC_Os03g58170.1.MSUv7.0	6e-110
79- 6:	Ft-FtPinG0007579700.01.T01	Os-LOC_Os03g58230.1.MSUv7.0	2e-89
79- 7:	Ft-FtPinG0007581800.01.T01	Os-LOC_Os03g58330.1.MSUv7.0	5e-92
79- 8:	Ft-FtPinG0007583600.01.T01	Os-LOC_Os03g58430.1.MSUv7.0	3e-89
79- 9:	Ft-FtPinG0007585200.01.T01	Os-LOC_Os03g58480.1.MSUv7.0	4e-45
## Alignment 80: score=336.0 e_value=3.8e-11 N=7 Ft-Ft6&Os-Chr3 plus
80- 0:	Ft-FtPinG0002661600.01.T01	Os-LOC_Os03g55320.1.MSUv7.0	3e-140
80- 1:	Ft-FtPinG0002662200.01.T01	Os-LOC_Os03g55350.1.MSUv7.0	0
80- 2:	Ft-FtPinG0002662500.01.T01	Os-LOC_Os03g55380.1.MSUv7.0	2e-121
80- 3:	Ft-FtPinG0002663000.01.T01	Os-LOC_Os03g55389.1.MSUv7.0	8e-129
80- 4:	Ft-FtPinG0002663500.01.T01	Os-LOC_Os03g55410.1.MSUv7.0	1e-118
80- 5:	Ft-FtPinG0002664200.01.T01	Os-LOC_Os03g55450.1.MSUv7.0	1e-33
80- 6:	Ft-FtPinG0002664900.01.T01	Os-LOC_Os03g55530.1.MSUv7.0	2e-163
## Alignment 81: score=302.0 e_value=2.6e-11 N=7 Ft-Ft6&Os-Chr3 plus
81- 0:	Ft-FtPinG0003249900.01.T01	Os-LOC_Os03g55560.1.MSUv7.0	7e-158
81- 1:	Ft-FtPinG0009356100.01.T01	Os-LOC_Os03g55590.1.MSUv7.0	3e-42
81- 2:	Ft-FtPinG0009356000.01.T01	Os-LOC_Os03g55600.1.MSUv7.0	0
81- 3:	Ft-FtPinG0004968400.01.T01	Os-LOC_Os03g55704.1.MSUv7.0	0
81- 4:	Ft-FtPinG0001474900.01.T01	Os-LOC_Os03g55830.1.MSUv7.0	0
81- 5:	Ft-FtPinG0001476800.01.T01	Os-LOC_Os03g55890.1.MSUv7.0	1e-153
81- 6:	Ft-FtPinG0001477900.01.T01	Os-LOC_Os03g55950.1.MSUv7.0	0
## Alignment 82: score=423.0 e_value=2.7e-20 N=10 Ft-Ft6&Os-Chr3 minus
82- 0:	Ft-FtPinG0006516000.01.T01	Os-LOC_Os03g53640.1.MSUv7.0	3e-54
82- 1:	Ft-FtPinG0007570800.01.T01	Os-LOC_Os03g53410.1.MSUv7.0	1e-146
82- 2:	Ft-FtPinG0007573400.01.T01	Os-LOC_Os03g53400.1.MSUv7.0	2e-85
82- 3:	Ft-FtPinG0007574700.01.T01	Os-LOC_Os03g53340.2.MSUv7.0	3e-86
82- 4:	Ft-FtPinG0007575500.01.T01	Os-LOC_Os03g53310.1.MSUv7.0	8e-95
82- 5:	Ft-FtPinG0007575900.01.T01	Os-LOC_Os03g53270.1.MSUv7.0	2e-118
82- 6:	Ft-FtPinG0007576700.01.T01	Os-LOC_Os03g53230.1.MSUv7.0	0
82- 7:	Ft-FtPinG0007581000.01.T01	Os-LOC_Os03g53150.1.MSUv7.0	6e-60
82- 8:	Ft-FtPinG0007583300.01.T01	Os-LOC_Os03g53020.1.MSUv7.0	2e-13
82- 9:	Ft-FtPinG0007585600.01.T01	Os-LOC_Os03g52980.1.MSUv7.0	0
## Alignment 83: score=298.0 e_value=2.6e-11 N=7 Ft-Ft6&Os-Chr3 minus
83- 0:	Ft-FtPinG0001478700.01.T01	Os-LOC_Os03g09250.1.MSUv7.0	0
83- 1:	Ft-FtPinG0001478900.01.T01	Os-LOC_Os03g09200.1.MSUv7.0	8e-50
83- 2:	Ft-FtPinG0001482700.01.T01	Os-LOC_Os03g09140.1.MSUv7.0	4e-123
83- 3:	Ft-FtPinG0001483900.01.T01	Os-LOC_Os03g09110.1.MSUv7.0	1e-166
83- 4:	Ft-FtPinG0009090300.01.T01	Os-LOC_Os03g08980.1.MSUv7.0	1e-18
83- 5:	Ft-FtPinG0009088500.01.T01	Os-LOC_Os03g08960.1.MSUv7.0	3e-41
83- 6:	Ft-FtPinG0009087100.01.T01	Os-LOC_Os03g08930.1.MSUv7.0	1e-49
## Alignment 84: score=289.0 e_value=6.4e-08 N=6 Ft-Ft6&Os-Chr3 minus
84- 0:	Ft-FtPinG0007570800.01.T01	Os-LOC_Os03g43760.1.MSUv7.0	0
84- 1:	Ft-FtPinG0007570900.01.T01	Os-LOC_Os03g43730.1.MSUv7.0	9e-61
84- 2:	Ft-FtPinG0007571100.01.T01	Os-LOC_Os03g43684.1.MSUv7.0	1e-64
84- 3:	Ft-FtPinG0007571800.01.T01	Os-LOC_Os03g43650.1.MSUv7.0	7e-122
84- 4:	Ft-FtPinG0007572800.01.T01	Os-LOC_Os03g43580.1.MSUv7.0	8e-59
84- 5:	Ft-FtPinG0007573100.01.T01	Os-LOC_Os03g43510.1.MSUv7.0	1e-112
## Alignment 85: score=253.0 e_value=2.6e-08 N=6 Ft-Ft6&Os-Chr3 minus
85- 0:	Ft-FtPinG0002660500.01.T01	Os-LOC_Os03g11010.1.MSUv7.0	0
85- 1:	Ft-FtPinG0002661600.01.T01	Os-LOC_Os03g10950.1.MSUv7.0	5e-125
85- 2:	Ft-FtPinG0002663000.01.T01	Os-LOC_Os03g10940.1.MSUv7.0	0
85- 3:	Ft-FtPinG0002664900.01.T01	Os-LOC_Os03g10810.1.MSUv7.0	2e-107
85- 4:	Ft-FtPinG0002665600.01.T02	Os-LOC_Os03g10640.1.MSUv7.0	0
85- 5:	Ft-FtPinG0002665900.01.T01	Os-LOC_Os03g10500.1.MSUv7.0	5e-93
## Alignment 86: score=282.0 e_value=1.5e-08 N=6 Ft-Ft6&Os-Chr5 minus
86- 0:	Ft-FtPinG0003082600.01.T01	Os-LOC_Os05g34110.1.MSUv7.0	4e-52
86- 1:	Ft-FtPinG0003081900.01.T01	Os-LOC_Os05g34070.1.MSUv7.0	2e-84
86- 2:	Ft-FtPinG0003081400.01.T01	Os-LOC_Os05g34050.1.MSUv7.0	5e-106
86- 3:	Ft-FtPinG0003081000.01.T01	Os-LOC_Os05g33960.1.MSUv7.0	0
86- 4:	Ft-FtPinG0003080400.01.T01	Os-LOC_Os05g33900.1.MSUv7.0	0
86- 5:	Ft-FtPinG0003079500.01.T01	Os-LOC_Os05g33880.1.MSUv7.0	4e-23
## Alignment 87: score=613.0 e_value=2e-33 N=14 Ft-Ft6&Os-Chr7 plus
87- 0:	Ft-FtPinG0006516300.01.T01	Os-LOC_Os07g07680.1.MSUv7.0	1e-131
87- 1:	Ft-FtPinG0007568800.01.T01	Os-LOC_Os07g07790.1.MSUv7.0	8e-25
87- 2:	Ft-FtPinG0007570300.01.T01	Os-LOC_Os07g07930.1.MSUv7.0	2e-24
87- 3:	Ft-FtPinG0007570900.01.T01	Os-LOC_Os07g07974.1.MSUv7.0	3e-115
87- 4:	Ft-FtPinG0007571800.01.T01	Os-LOC_Os07g07990.1.MSUv7.0	3e-125
87- 5:	Ft-FtPinG0007573400.01.T01	Os-LOC_Os07g08070.1.MSUv7.0	4e-85
87- 6:	Ft-FtPinG0007574700.01.T01	Os-LOC_Os07g08140.1.MSUv7.0	7e-104
87- 7:	Ft-FtPinG0007575400.01.T01	Os-LOC_Os07g08150.1.MSUv7.0	4e-39
87- 8:	Ft-FtPinG0007578700.01.T01	Os-LOC_Os07g08340.1.MSUv7.0	0
87- 9:	Ft-FtPinG0007581800.01.T01	Os-LOC_Os07g08440.1.MSUv7.0	7e-65
87- 10:	Ft-FtPinG0007583600.01.T01	Os-LOC_Os07g08660.1.MSUv7.0	8e-100
87- 11:	Ft-FtPinG0007583700.01.T01	Os-LOC_Os07g08710.1.MSUv7.0	4e-25
87- 12:	Ft-FtPinG0007584400.01.T01	Os-LOC_Os07g08760.1.MSUv7.0	3e-164
87- 13:	Ft-FtPinG0007585200.01.T01	Os-LOC_Os07g08790.1.MSUv7.0	5e-41
## Alignment 88: score=265.0 e_value=2.2e-08 N=6 Ft-Ft6&Os-Chr7 plus
88- 0:	Ft-FtPinG0002050700.01.T01	Os-LOC_Os07g42860.1.MSUv7.0	2e-44
88- 1:	Ft-FtPinG0002051800.01.T01	Os-LOC_Os07g42890.1.MSUv7.0	3e-75
88- 2:	Ft-FtPinG0002055600.01.T01	Os-LOC_Os07g42910.1.MSUv7.0	2e-55
88- 3:	Ft-FtPinG0002056300.01.T01	Os-LOC_Os07g42950.1.MSUv7.0	6e-158
88- 4:	Ft-FtPinG0002059100.01.T01	Os-LOC_Os07g43020.1.MSUv7.0	4e-42
88- 5:	Ft-FtPinG0002060800.01.T01	Os-LOC_Os07g43160.1.MSUv7.0	1e-115
## Alignment 89: score=252.0 e_value=4.5e-09 N=6 Ft-Ft6&Os-Chr7 minus
89- 0:	Ft-FtPinG0009890200.01.T01	Os-LOC_Os07g42950.1.MSUv7.0	5e-158
89- 1:	Ft-FtPinG0009090900.01.T01	Os-LOC_Os07g42940.1.MSUv7.0	0
89- 2:	Ft-FtPinG0009087400.01.T01	Os-LOC_Os07g42900.1.MSUv7.0	0
89- 3:	Ft-FtPinG0009086100.01.T01	Os-LOC_Os07g42860.1.MSUv7.0	1e-70
89- 4:	Ft-FtPinG0009084300.01.T01	Os-LOC_Os07g42800.1.MSUv7.0	8e-15
89- 5:	Ft-FtPinG0009080900.01.T01	Os-LOC_Os07g42510.1.MSUv7.0	2e-26
## Alignment 90: score=343.0 e_value=1.9e-14 N=8 Ft-Ft6&Os-Chr8 minus
90- 0:	Ft-FtPinG0001484100.01.T01	Os-LOC_Os08g37970.1.MSUv7.0	6e-96
90- 1:	Ft-FtPinG0001485400.01.T01	Os-LOC_Os08g37940.1.MSUv7.0	2e-143
90- 2:	Ft-FtPinG0001487400.01.T01	Os-LOC_Os08g37780.1.MSUv7.0	0
90- 3:	Ft-FtPinG0009088500.01.T01	Os-LOC_Os08g37580.1.MSUv7.0	1e-57
90- 4:	Ft-FtPinG0009086800.01.T01	Os-LOC_Os08g37400.1.MSUv7.0	6e-50
90- 5:	Ft-FtPinG0009086100.01.T01	Os-LOC_Os08g37390.1.MSUv7.0	2e-66
90- 6:	Ft-FtPinG0009085700.01.T01	Os-LOC_Os08g37370.1.MSUv7.0	1e-158
90- 7:	Ft-FtPinG0009084500.01.T02	Os-LOC_Os08g37290.1.MSUv7.0	1e-24
## Alignment 91: score=266.0 e_value=4e-09 N=6 Ft-Ft6&Os-Chr9 plus
91- 0:	Ft-FtPinG0005770700.01.T01	Os-LOC_Os09g36760.1.MSUv7.0	5e-113
91- 1:	Ft-FtPinG0005771100.01.T02	Os-LOC_Os09g36800.1.MSUv7.0	8e-142
91- 2:	Ft-FtPinG0005773300.01.T01	Os-LOC_Os09g36830.1.MSUv7.0	3e-77
91- 3:	Ft-FtPinG0005773600.01.T01	Os-LOC_Os09g36910.1.MSUv7.0	2e-12
91- 4:	Ft-FtPinG0005775100.01.T01	Os-LOC_Os09g37040.1.MSUv7.0	8e-125
91- 5:	Ft-FtPinG0005775900.01.T01	Os-LOC_Os09g37100.1.MSUv7.0	0
## Alignment 92: score=393.0 e_value=5e-17 N=9 Ft-Ft6&Os-Chr9 minus
92- 0:	Ft-FtPinG0001487400.01.T01	Os-LOC_Os09g29630.1.MSUv7.0	0
92- 1:	Ft-FtPinG0001487500.01.T01	Os-LOC_Os09g29490.1.MSUv7.0	6e-153
92- 2:	Ft-FtPinG0009089500.01.T02	Os-LOC_Os09g29470.1.MSUv7.0	0
92- 3:	Ft-FtPinG0009088500.01.T01	Os-LOC_Os09g29460.1.MSUv7.0	7e-48
92- 4:	Ft-FtPinG0009087100.01.T01	Os-LOC_Os09g29360.1.MSUv7.0	5e-42
92- 5:	Ft-FtPinG0009086800.01.T01	Os-LOC_Os09g29130.1.MSUv7.0	8e-53
92- 6:	Ft-FtPinG0009086100.01.T01	Os-LOC_Os09g29100.1.MSUv7.0	1e-74
92- 7:	Ft-FtPinG0009085700.01.T01	Os-LOC_Os09g29050.1.MSUv7.0	4e-130
92- 8:	Ft-FtPinG0009084500.01.T02	Os-LOC_Os09g28900.1.MSUv7.0	1e-24
## Alignment 93: score=292.0 e_value=4.7e-12 N=7 Ft-Ft8&Os-Chr1 plus
93- 0:	Ft-FtPinG0009261700.01.T01	Os-LOC_Os01g10580.1.MSUv7.0	5e-39
93- 1:	Ft-FtPinG0009262600.01.T02	Os-LOC_Os01g10630.1.MSUv7.0	3e-42
93- 2:	Ft-FtPinG0009263100.01.T01	Os-LOC_Os01g10680.1.MSUv7.0	4e-106
93- 3:	Ft-FtPinG0009265600.01.T01	Os-LOC_Os01g10900.1.MSUv7.0	9e-41
93- 4:	Ft-FtPinG0009267300.01.T01	Os-LOC_Os01g11054.1.MSUv7.0	0
93- 5:	Ft-FtPinG0009267500.01.T01	Os-LOC_Os01g11070.1.MSUv7.0	0
93- 6:	Ft-FtPinG0000966800.01.T01	Os-LOC_Os01g11350.1.MSUv7.0	8e-57
## Alignment 94: score=267.0 e_value=2.2e-09 N=6 Ft-Ft8&Os-Chr1 plus
94- 0:	Ft-FtPinG0002281400.01.T01	Os-LOC_Os01g57220.1.MSUv7.0	4e-154
94- 1:	Ft-FtPinG0002276300.01.T01	Os-LOC_Os01g57350.2.MSUv7.0	5e-58
94- 2:	Ft-FtPinG0002269500.01.T01	Os-LOC_Os01g57470.1.MSUv7.0	3e-32
94- 3:	Ft-FtPinG0002269100.01.T01	Os-LOC_Os01g57510.1.MSUv7.0	0
94- 4:	Ft-FtPinG0002267600.01.T01	Os-LOC_Os01g57570.1.MSUv7.0	5e-116
94- 5:	Ft-FtPinG0002267300.01.T01	Os-LOC_Os01g57580.1.MSUv7.0	1e-44
## Alignment 95: score=415.0 e_value=2.2e-22 N=11 Ft-Ft8&Os-Chr1 minus
95- 0:	Ft-FtPinG0009199800.01.T02	Os-LOC_Os01g62650.1.MSUv7.0	0
95- 1:	Ft-FtPinG0009202800.01.T01	Os-LOC_Os01g62460.1.MSUv7.0	6e-141
95- 2:	Ft-FtPinG0009207800.01.T01	Os-LOC_Os01g62420.1.MSUv7.0	2e-142
95- 3:	Ft-FtPinG0009210300.01.T01	Os-LOC_Os01g62370.1.MSUv7.0	8e-70
95- 4:	Ft-FtPinG0009213700.01.T01	Os-LOC_Os01g62260.1.MSUv7.0	3e-102
95- 5:	Ft-FtPinG0009219000.01.T01	Os-LOC_Os01g62230.1.MSUv7.0	5e-59
95- 6:	Ft-FtPinG0009222200.01.T01	Os-LOC_Os01g62190.1.MSUv7.0	2e-16
95- 7:	Ft-FtPinG0009225500.01.T01	Os-LOC_Os01g61990.2.MSUv7.0	2e-118
95- 8:	Ft-FtPinG0009229300.01.T01	Os-LOC_Os01g61880.1.MSUv7.0	0
95- 9:	Ft-FtPinG0009230300.01.T01	Os-LOC_Os01g61570.1.MSUv7.0	1e-99
95- 10:	Ft-FtPinG0009236800.01.T01	Os-LOC_Os01g61350.1.MSUv7.0	2e-54
## Alignment 96: score=308.0 e_value=1.8e-11 N=7 Ft-Ft8&Os-Chr1 minus
96- 0:	Ft-FtPinG0009658600.01.T02	Os-LOC_Os01g64170.1.MSUv7.0	2e-70
96- 1:	Ft-FtPinG0004910100.01.T01	Os-LOC_Os01g64030.2.MSUv7.0	8e-178
96- 2:	Ft-FtPinG0004910400.01.T01	Os-LOC_Os01g63990.1.MSUv7.0	2e-100
96- 3:	Ft-FtPinG0004911400.01.T01	Os-LOC_Os01g63970.1.MSUv7.0	1e-116
96- 4:	Ft-FtPinG0008523600.01.T01	Os-LOC_Os01g63930.1.MSUv7.0	0
96- 5:	Ft-FtPinG0008524700.01.T01	Os-LOC_Os01g63890.1.MSUv7.0	6e-96
96- 6:	Ft-FtPinG0009091700.01.T01	Os-LOC_Os01g63854.1.MSUv7.0	0
## Alignment 97: score=306.0 e_value=4.6e-14 N=7 Ft-Ft8&Os-Chr1 minus
97- 0:	Ft-FtPinG0002305900.01.T01	Os-LOC_Os01g54620.1.MSUv7.0	0
97- 1:	Ft-FtPinG0002298200.01.T01	Os-LOC_Os01g54510.1.MSUv7.0	0
97- 2:	Ft-FtPinG0002297600.01.T01	Os-LOC_Os01g54480.1.MSUv7.0	3e-137
97- 3:	Ft-FtPinG0002297300.01.T01	Os-LOC_Os01g54470.1.MSUv7.0	6e-73
97- 4:	Ft-FtPinG0002292500.01.T01	Os-LOC_Os01g54400.1.MSUv7.0	3e-47
97- 5:	Ft-FtPinG0002291300.01.T01	Os-LOC_Os01g54350.1.MSUv7.0	2e-123
97- 6:	Ft-FtPinG0002291100.01.T01	Os-LOC_Os01g54340.1.MSUv7.0	2e-75
## Alignment 98: score=256.0 e_value=8.9e-08 N=6 Ft-Ft8&Os-Chr1 minus
98- 0:	Ft-FtPinG0006532300.01.T01	Os-LOC_Os01g63770.1.MSUv7.0	0
98- 1:	Ft-FtPinG0006532200.01.T01	Os-LOC_Os01g63580.1.MSUv7.0	0
98- 2:	Ft-FtPinG0006531400.01.T01	Os-LOC_Os01g63460.1.MSUv7.0	1e-40
98- 3:	Ft-FtPinG0006530000.01.T01	Os-LOC_Os01g63230.1.MSUv7.0	2e-34
98- 4:	Ft-FtPinG0006528100.01.T01	Os-LOC_Os01g63050.1.MSUv7.0	3e-11
98- 5:	Ft-FtPinG0006528000.01.T02	Os-LOC_Os01g62980.1.MSUv7.0	3e-36
## Alignment 99: score=250.0 e_value=6.1e-08 N=6 Ft-Ft8&Os-Chr1 minus
99- 0:	Ft-FtPinG0007159100.01.T01	Os-LOC_Os01g63800.1.MSUv7.0	3e-65
99- 1:	Ft-FtPinG0007158000.01.T01	Os-LOC_Os01g63680.1.MSUv7.0	1e-44
99- 2:	Ft-FtPinG0007157100.01.T01	Os-LOC_Os01g63470.1.MSUv7.0	7e-46
99- 3:	Ft-FtPinG0007156400.01.T01	Os-LOC_Os01g63270.1.MSUv7.0	0
99- 4:	Ft-FtPinG0009194100.01.T01	Os-LOC_Os01g63010.1.MSUv7.0	5e-64
99- 5:	Ft-FtPinG0009194900.01.T01	Os-LOC_Os01g62950.1.MSUv7.0	8e-126
## Alignment 100: score=259.0 e_value=2.3e-08 N=6 Ft-Ft8&Os-Chr10 minus
100- 0:	Ft-FtPinG0009245000.01.T01	Os-LOC_Os10g41820.2.MSUv7.0	0
100- 1:	Ft-FtPinG0009246400.01.T01	Os-LOC_Os10g41710.1.MSUv7.0	4e-54
100- 2:	Ft-FtPinG0009251600.01.T01	Os-LOC_Os10g41520.1.MSUv7.0	6e-133
100- 3:	Ft-FtPinG0009254600.01.T01	Os-LOC_Os10g41430.1.MSUv7.0	8e-69
100- 4:	Ft-FtPinG0009256500.01.T01	Os-LOC_Os10g41410.1.MSUv7.0	9e-64
100- 5:	Ft-FtPinG0009258200.01.T01	Os-LOC_Os10g41310.1.MSUv7.0	0
## Alignment 101: score=380.0 e_value=4.5e-17 N=9 Ft-Ft8&Os-Chr12 plus
101- 0:	Ft-FtPinG0003269900.01.T01	Os-LOC_Os12g05360.1.MSUv7.0	2e-29
101- 1:	Ft-FtPinG0004863100.01.T01	Os-LOC_Os12g05420.1.MSUv7.0	8e-180
101- 2:	Ft-FtPinG0007436400.01.T01	Os-LOC_Os12g05560.1.MSUv7.0	4e-12
101- 3:	Ft-FtPinG0008717700.01.T02	Os-LOC_Os12g05600.1.MSUv7.0	1e-132
101- 4:	Ft-FtPinG0008720300.01.T01	Os-LOC_Os12g05730.1.MSUv7.0	3e-37
101- 5:	Ft-FtPinG0001884700.01.T01	Os-LOC_Os12g05900.1.MSUv7.0	2e-123
101- 6:	Ft-FtPinG0001882600.01.T01	Os-LOC_Os12g06020.1.MSUv7.0	1e-102
101- 7:	Ft-FtPinG0001881900.01.T01	Os-LOC_Os12g06030.1.MSUv7.0	6e-35
101- 8:	Ft-FtPinG0007509300.01.T01	Os-LOC_Os12g06080.1.MSUv7.0	6e-50
## Alignment 102: score=305.0 e_value=2.6e-11 N=7 Ft-Ft8&Os-Chr12 plus
102- 0:	Ft-FtPinG0002501900.01.T01	Os-LOC_Os12g41890.1.MSUv7.0	0
102- 1:	Ft-FtPinG0002499300.01.T01	Os-LOC_Os12g41940.1.MSUv7.0	3e-55
102- 2:	Ft-FtPinG0002498800.01.T01	Os-LOC_Os12g42120.1.MSUv7.0	0
102- 3:	Ft-FtPinG0006025100.01.T01	Os-LOC_Os12g42190.1.MSUv7.0	3e-27
102- 4:	Ft-FtPinG0001004500.01.T01	Os-LOC_Os12g42210.1.MSUv7.0	5e-92
102- 5:	Ft-FtPinG0001003800.01.T01	Os-LOC_Os12g42230.1.MSUv7.0	0
102- 6:	Ft-FtPinG0009412200.01.T01	Os-LOC_Os12g42280.1.MSUv7.0	0
## Alignment 103: score=259.0 e_value=1.9e-08 N=6 Ft-Ft8&Os-Chr12 minus
103- 0:	Ft-FtPinG0006476500.01.T01	Os-LOC_Os12g05640.1.MSUv7.0	3e-36
103- 1:	Ft-FtPinG0004910400.01.T01	Os-LOC_Os12g05600.1.MSUv7.0	3e-116
103- 2:	Ft-FtPinG0004911400.01.T01	Os-LOC_Os12g05550.1.MSUv7.0	2e-95
103- 3:	Ft-FtPinG0008523600.01.T01	Os-LOC_Os12g05440.1.MSUv7.0	0
103- 4:	Ft-FtPinG0008524700.01.T01	Os-LOC_Os12g05410.1.MSUv7.0	2e-91
103- 5:	Ft-FtPinG0006569600.01.T01	Os-LOC_Os12g05360.1.MSUv7.0	2e-32
## Alignment 104: score=269.0 e_value=2.4e-08 N=6 Ft-Ft8&Os-Chr2 plus
104- 0:	Ft-FtPinG0009251400.01.T01	Os-LOC_Os02g43430.1.MSUv7.0	2e-161
104- 1:	Ft-FtPinG0009254600.01.T01	Os-LOC_Os02g43550.1.MSUv7.0	1e-53
104- 2:	Ft-FtPinG0009256800.01.T01	Os-LOC_Os02g43590.1.MSUv7.0	1e-145
104- 3:	Ft-FtPinG0009257900.01.T01	Os-LOC_Os02g43740.1.MSUv7.0	0
104- 4:	Ft-FtPinG0009258200.01.T01	Os-LOC_Os02g43770.1.MSUv7.0	2e-95
104- 5:	Ft-FtPinG0009258700.01.T01	Os-LOC_Os02g43810.1.MSUv7.0	4e-86
## Alignment 105: score=347.0 e_value=3.1e-14 N=8 Ft-Ft8&Os-Chr2 minus
105- 0:	Ft-FtPinG0006132900.01.T01	Os-LOC_Os02g55130.2.MSUv7.0	2e-149
105- 1:	Ft-FtPinG0001692200.01.T02	Os-LOC_Os02g54910.1.MSUv7.0	5e-136
105- 2:	Ft-FtPinG0001692700.01.T01	Os-LOC_Os02g54880.1.MSUv7.0	2e-20
105- 3:	Ft-FtPinG0001695600.01.T01	Os-LOC_Os02g54860.1.MSUv7.0	0
105- 4:	Ft-FtPinG0001696200.01.T01	Os-LOC_Os02g54820.1.MSUv7.0	0
105- 5:	Ft-FtPinG0004071000.01.T01	Os-LOC_Os02g54720.1.MSUv7.0	3e-124
105- 6:	Ft-FtPinG0004071100.01.T01	Os-LOC_Os02g54650.1.MSUv7.0	3e-124
105- 7:	Ft-FtPinG0009060700.01.T01	Os-LOC_Os02g54520.1.MSUv7.0	3e-73
## Alignment 106: score=742.0 e_value=1.2e-43 N=17 Ft-Ft8&Os-Chr3 plus
106- 0:	Ft-FtPinG0009193800.01.T01	Os-LOC_Os03g16070.2.MSUv7.0	1e-23
106- 1:	Ft-FtPinG0009195400.01.T01	Os-LOC_Os03g16120.1.MSUv7.0	6e-140
106- 2:	Ft-FtPinG0009198000.01.T01	Os-LOC_Os03g16210.1.MSUv7.0	3e-112
106- 3:	Ft-FtPinG0009198700.01.T01	Os-LOC_Os03g16440.1.MSUv7.0	0
106- 4:	Ft-FtPinG0009199500.01.T01	Os-LOC_Os03g16470.3.MSUv7.0	3e-12
106- 5:	Ft-FtPinG0009202500.01.T01	Os-LOC_Os03g16670.1.MSUv7.0	1e-114
106- 6:	Ft-FtPinG0009203000.01.T01	Os-LOC_Os03g16700.1.MSUv7.0	4e-103
106- 7:	Ft-FtPinG0009207600.01.T01	Os-LOC_Os03g16740.1.MSUv7.0	0
106- 8:	Ft-FtPinG0009210100.01.T01	Os-LOC_Os03g16760.1.MSUv7.0	9e-108
106- 9:	Ft-FtPinG0009212400.01.T02	Os-LOC_Os03g16790.1.MSUv7.0	7e-82
106- 10:	Ft-FtPinG0009214900.01.T01	Os-LOC_Os03g16980.1.MSUv7.0	0
106- 11:	Ft-FtPinG0009219000.01.T01	Os-LOC_Os03g17084.1.MSUv7.0	2e-59
106- 12:	Ft-FtPinG0009219100.01.T01	Os-LOC_Os03g17100.1.MSUv7.0	1e-71
106- 13:	Ft-FtPinG0009222200.01.T01	Os-LOC_Os03g17150.1.MSUv7.0	1e-15
106- 14:	Ft-FtPinG0009223900.01.T01	Os-LOC_Os03g17220.1.MSUv7.0	2e-65
106- 15:	Ft-FtPinG0009225500.01.T01	Os-LOC_Os03g17240.1.MSUv7.0	6e-129
106- 16:	Ft-FtPinG0009225900.01.T01	Os-LOC_Os03g17310.1.MSUv7.0	9e-70
## Alignment 107: score=381.0 e_value=9.9e-17 N=9 Ft-Ft8&Os-Chr3 plus
107- 0:	Ft-FtPinG0007617500.01.T01	Os-LOC_Os03g60350.1.MSUv7.0	6e-122
107- 1:	Ft-FtPinG0007614100.01.T01	Os-LOC_Os03g60430.2.MSUv7.0	5e-99
107- 2:	Ft-FtPinG0004206800.01.T01	Os-LOC_Os03g60520.1.MSUv7.0	5e-19
107- 3:	Ft-FtPinG0004207800.01.T01	Os-LOC_Os03g60530.1.MSUv7.0	2e-131
107- 4:	Ft-FtPinG0004209600.01.T01	Os-LOC_Os03g60630.1.MSUv7.0	1e-44
107- 5:	Ft-FtPinG0004213200.01.T02	Os-LOC_Os03g60650.1.MSUv7.0	2e-174
107- 6:	Ft-FtPinG0004215700.01.T01	Os-LOC_Os03g60710.1.MSUv7.0	1e-180
107- 7:	Ft-FtPinG0004216200.01.T01	Os-LOC_Os03g60740.1.MSUv7.0	2e-149
107- 8:	Ft-FtPinG0004217100.01.T01	Os-LOC_Os03g60780.1.MSUv7.0	0
## Alignment 108: score=591.0 e_value=1.6e-33 N=14 Ft-Ft8&Os-Chr3 minus
108- 0:	Ft-FtPinG0005184900.01.T01	Os-LOC_Os03g17610.1.MSUv7.0	0
108- 1:	Ft-FtPinG0005184700.01.T01	Os-LOC_Os03g17600.1.MSUv7.0	1e-66
108- 2:	Ft-FtPinG0005184600.01.T01	Os-LOC_Os03g17570.3.MSUv7.0	7e-125
108- 3:	Ft-FtPinG0004204000.01.T01	Os-LOC_Os03g17350.1.MSUv7.0	4e-162
108- 4:	Ft-FtPinG0004206800.01.T01	Os-LOC_Os03g17210.1.MSUv7.0	2e-37
108- 5:	Ft-FtPinG0004207500.01.T01	Os-LOC_Os03g17164.1.MSUv7.0	2e-166
108- 6:	Ft-FtPinG0004208400.01.T01	Os-LOC_Os03g17120.1.MSUv7.0	0
108- 7:	Ft-FtPinG0004210300.01.T01	Os-LOC_Os03g16910.1.MSUv7.0	1e-70
108- 8:	Ft-FtPinG0004213200.01.T02	Os-LOC_Os03g16760.1.MSUv7.0	6e-138
108- 9:	Ft-FtPinG0004215700.01.T01	Os-LOC_Os03g16740.1.MSUv7.0	2e-176
108- 10:	Ft-FtPinG0004216800.01.T01	Os-LOC_Os03g16610.1.MSUv7.0	0
108- 11:	Ft-FtPinG0004217000.01.T01	Os-LOC_Os03g16480.1.MSUv7.0	4e-71
108- 12:	Ft-FtPinG0004217100.01.T01	Os-LOC_Os03g16460.1.MSUv7.0	3e-153
108- 13:	Ft-FtPinG0004218900.01.T02	Os-LOC_Os03g16210.1.MSUv7.0	2e-106
## Alignment 109: score=276.0 e_value=7e-08 N=6 Ft-Ft8&Os-Chr3 minus
109- 0:	Ft-FtPinG0002357700.01.T01	Os-LOC_Os03g11540.1.MSUv7.0	0
109- 1:	Ft-FtPinG0002355500.01.T01	Os-LOC_Os03g11490.1.MSUv7.0	3e-11
109- 2:	Ft-FtPinG0002355100.01.T01	Os-LOC_Os03g11470.1.MSUv7.0	3e-99
109- 3:	Ft-FtPinG0002352500.01.T01	Os-LOC_Os03g11450.1.MSUv7.0	3e-77
109- 4:	Ft-FtPinG0002349200.01.T01	Os-LOC_Os03g11360.2.MSUv7.0	3e-119
109- 5:	Ft-FtPinG0002347100.01.T01	Os-LOC_Os03g11290.1.MSUv7.0	2e-20
## Alignment 110: score=331.0 e_value=1e-10 N=7 Ft-Ft8&Os-Chr4 plus
110- 0:	Ft-FtPinG0009251400.01.T01	Os-LOC_Os04g45920.1.MSUv7.0	2e-138
110- 1:	Ft-FtPinG0009254600.01.T01	Os-LOC_Os04g46000.1.MSUv7.0	2e-56
110- 2:	Ft-FtPinG0009255400.01.T02	Os-LOC_Os04g46010.1.MSUv7.0	5e-110
110- 3:	Ft-FtPinG0009255800.01.T01	Os-LOC_Os04g46060.1.MSUv7.0	5e-61
110- 4:	Ft-FtPinG0009256800.01.T01	Os-LOC_Os04g46079.1.MSUv7.0	1e-139
110- 5:	Ft-FtPinG0009257000.01.T01	Os-LOC_Os04g46120.1.MSUv7.0	4e-16
110- 6:	Ft-FtPinG0009257900.01.T01	Os-LOC_Os04g46180.1.MSUv7.0	0
## Alignment 111: score=408.0 e_value=1.9e-18 N=10 Ft-Ft8&Os-Chr5 plus
111- 0:	Ft-FtPinG0009199800.01.T02	Os-LOC_Os05g01910.1.MSUv7.0	0
111- 1:	Ft-FtPinG0009203700.01.T01	Os-LOC_Os05g01994.1.MSUv7.0	8e-56
111- 2:	Ft-FtPinG0009207600.01.T01	Os-LOC_Os05g02020.1.MSUv7.0	0
111- 3:	Ft-FtPinG0009210100.01.T01	Os-LOC_Os05g02110.1.MSUv7.0	1e-108
111- 4:	Ft-FtPinG0009217500.01.T01	Os-LOC_Os05g02220.1.MSUv7.0	3e-157
111- 5:	Ft-FtPinG0009219100.01.T01	Os-LOC_Os05g02300.1.MSUv7.0	2e-76
111- 6:	Ft-FtPinG0009222200.01.T01	Os-LOC_Os05g02390.1.MSUv7.0	1e-16
111- 7:	Ft-FtPinG0009223700.01.T01	Os-LOC_Os05g02490.1.MSUv7.0	7e-179
111- 8:	Ft-FtPinG0009225700.01.T01	Os-LOC_Os05g02650.1.MSUv7.0	0
111- 9:	Ft-FtPinG0009228300.01.T01	Os-LOC_Os05g02680.1.MSUv7.0	1e-56
## Alignment 112: score=451.0 e_value=5.5e-24 N=11 Ft-Ft8&Os-Chr5 minus
112- 0:	Ft-FtPinG0007614600.01.T01	Os-LOC_Os05g03100.1.MSUv7.0	5e-13
112- 1:	Ft-FtPinG0007614100.01.T01	Os-LOC_Os05g03040.1.MSUv7.0	2e-91
112- 2:	Ft-FtPinG0004204000.01.T01	Os-LOC_Os05g02870.1.MSUv7.0	3e-152
112- 3:	Ft-FtPinG0004206800.01.T01	Os-LOC_Os05g02580.1.MSUv7.0	9e-12
112- 4:	Ft-FtPinG0004208100.01.T01	Os-LOC_Os05g02310.1.MSUv7.0	3e-133
112- 5:	Ft-FtPinG0004209600.01.T01	Os-LOC_Os05g02150.1.MSUv7.0	7e-40
112- 6:	Ft-FtPinG0004212700.01.T01	Os-LOC_Os05g02120.1.MSUv7.0	1e-158
112- 7:	Ft-FtPinG0004213200.01.T02	Os-LOC_Os05g02110.1.MSUv7.0	3e-125
112- 8:	Ft-FtPinG0004215700.01.T01	Os-LOC_Os05g02020.1.MSUv7.0	0
112- 9:	Ft-FtPinG0004216200.01.T01	Os-LOC_Os05g01970.5.MSUv7.0	3e-142
112- 10:	Ft-FtPinG0004217000.01.T01	Os-LOC_Os05g01940.1.MSUv7.0	4e-111
## Alignment 113: score=256.0 e_value=6e-09 N=6 Ft-Ft8&Os-Chr6 minus
113- 0:	Ft-FtPinG0004921100.01.T03	Os-LOC_Os06g40490.1.MSUv7.0	1e-148
113- 1:	Ft-FtPinG0008039400.01.T01	Os-LOC_Os06g40360.1.MSUv7.0	5e-167
113- 2:	Ft-FtPinG0008040100.01.T01	Os-LOC_Os06g40120.1.MSUv7.0	1e-123
113- 3:	Ft-FtPinG0008040500.01.T01	Os-LOC_Os06g40080.1.MSUv7.0	2e-121
113- 4:	Ft-FtPinG0008042600.01.T01	Os-LOC_Os06g40020.1.MSUv7.0	3e-166
113- 5:	Ft-FtPinG0008043700.01.T01	Os-LOC_Os06g39900.1.MSUv7.0	8e-46
## Alignment 114: score=312.0 e_value=2.1e-11 N=7 Ft-Ft8&Os-Chr7 plus
114- 0:	Ft-FtPinG0007170700.01.T01	Os-LOC_Os07g06490.1.MSUv7.0	2e-99
114- 1:	Ft-FtPinG0007170300.01.T01	Os-LOC_Os07g06570.1.MSUv7.0	6e-82
114- 2:	Ft-FtPinG0007170200.01.T01	Os-LOC_Os07g06590.1.MSUv7.0	1e-46
114- 3:	Ft-FtPinG0007169300.01.T01	Os-LOC_Os07g06680.1.MSUv7.0	0
114- 4:	Ft-FtPinG0007168700.01.T01	Os-LOC_Os07g06710.1.MSUv7.0	0
114- 5:	Ft-FtPinG0007168100.01.T01	Os-LOC_Os07g06950.1.MSUv7.0	0
114- 6:	Ft-FtPinG0007167400.01.T01	Os-LOC_Os07g06990.1.MSUv7.0	6e-31
## Alignment 115: score=310.0 e_value=4.1e-12 N=7 Ft-Ft8&Os-Chr7 plus
115- 0:	Ft-FtPinG0002502200.01.T01	Os-LOC_Os07g05470.1.MSUv7.0	0
115- 1:	Ft-FtPinG0002501300.01.T01	Os-LOC_Os07g05480.1.MSUv7.0	4e-58
115- 2:	Ft-FtPinG0002500100.01.T01	Os-LOC_Os07g05570.1.MSUv7.0	0
115- 3:	Ft-FtPinG0006025100.01.T01	Os-LOC_Os07g05720.1.MSUv7.0	3e-37
115- 4:	Ft-FtPinG0001004400.01.T01	Os-LOC_Os07g05820.2.MSUv7.0	0
115- 5:	Ft-FtPinG0009412000.01.T01	Os-LOC_Os07g05880.1.MSUv7.0	0
115- 6:	Ft-FtPinG0009411600.01.T01	Os-LOC_Os07g05950.1.MSUv7.0	4e-19
## Alignment 116: score=293.0 e_value=5.3e-14 N=7 Ft-Ft8&Os-Chr7 plus
116- 0:	Ft-FtPinG0008927600.01.T01	Os-LOC_Os07g06560.1.MSUv7.0	4e-41
116- 1:	Ft-FtPinG0008927400.01.T01	Os-LOC_Os07g06590.1.MSUv7.0	9e-55
116- 2:	Ft-FtPinG0008927000.01.T01	Os-LOC_Os07g06600.1.MSUv7.0	7e-50
116- 3:	Ft-FtPinG0008926800.01.T01	Os-LOC_Os07g06740.2.MSUv7.0	0
116- 4:	Ft-FtPinG0008922600.01.T01	Os-LOC_Os07g06890.1.MSUv7.0	5e-95
116- 5:	Ft-FtPinG0008921300.01.T01	Os-LOC_Os07g07000.1.MSUv7.0	2e-137
116- 6:	Ft-FtPinG0002504400.01.T01	Os-LOC_Os07g07270.1.MSUv7.0	0
## Alignment 117: score=358.0 e_value=9.6e-18 N=9 Ft-Ft8&Os-Chr7 minus
117- 0:	Ft-FtPinG0002281400.01.T01	Os-LOC_Os07g37740.1.MSUv7.0	7e-168
117- 1:	Ft-FtPinG0002276300.01.T01	Os-LOC_Os07g37580.1.MSUv7.0	2e-69
117- 2:	Ft-FtPinG0002273600.01.T01	Os-LOC_Os07g37350.1.MSUv7.0	2e-135
117- 3:	Ft-FtPinG0002273400.01.T01	Os-LOC_Os07g37320.1.MSUv7.0	0
117- 4:	Ft-FtPinG0002272500.01.T01	Os-LOC_Os07g37270.1.MSUv7.0	7e-95
117- 5:	Ft-FtPinG0002272200.01.T01	Os-LOC_Os07g37210.1.MSUv7.0	3e-86
117- 6:	Ft-FtPinG0002271000.01.T01	Os-LOC_Os07g37040.1.MSUv7.0	3e-50
117- 7:	Ft-FtPinG0002270700.01.T01	Os-LOC_Os07g36820.1.MSUv7.0	2e-66
117- 8:	Ft-FtPinG0002269300.01.T01	Os-LOC_Os07g36544.2.MSUv7.0	0
## Alignment 118: score=264.0 e_value=9.4e-12 N=6 Ft-Ft8&Os-Chr7 minus
118- 0:	Ft-FtPinG0004336900.01.T01	Os-LOC_Os07g47710.1.MSUv7.0	3e-32
118- 1:	Ft-FtPinG0004336700.01.T01	Os-LOC_Os07g47670.2.MSUv7.0	5e-19
118- 2:	Ft-FtPinG0004334900.01.T01	Os-LOC_Os07g47480.2.MSUv7.0	9e-21
118- 3:	Ft-FtPinG0004334700.01.T01	Os-LOC_Os07g47460.1.MSUv7.0	6e-13
118- 4:	Ft-FtPinG0004334300.01.T01	Os-LOC_Os07g47450.1.MSUv7.0	2e-31
118- 5:	Ft-FtPinG0004332200.01.T01	Os-LOC_Os07g47270.1.MSUv7.0	0
## Alignment 119: score=270.0 e_value=1.3e-09 N=6 Ft-Ft8&Os-Chr8 plus
119- 0:	Ft-FtPinG0000990100.01.T01	Os-LOC_Os08g39450.1.MSUv7.0	8e-31
119- 1:	Ft-FtPinG0000990500.01.T01	Os-LOC_Os08g39460.1.MSUv7.0	5e-124
119- 2:	Ft-FtPinG0003274700.01.T01	Os-LOC_Os08g39630.1.MSUv7.0	9e-49
119- 3:	Ft-FtPinG0003276900.01.T01	Os-LOC_Os08g39740.1.MSUv7.0	1e-157
119- 4:	Ft-FtPinG0003277600.01.T01	Os-LOC_Os08g39830.2.MSUv7.0	3e-15
119- 5:	Ft-FtPinG0003282300.01.T01	Os-LOC_Os08g39840.1.MSUv7.0	0
## Alignment 120: score=336.0 e_value=7.5e-12 N=7 Ft-Ft8&Os-Chr9 plus
120- 0:	Ft-FtPinG0000990000.01.T01	Os-LOC_Os09g31190.1.MSUv7.0	4e-50
120- 1:	Ft-FtPinG0000990100.01.T01	Os-LOC_Os09g31200.1.MSUv7.0	1e-35
120- 2:	Ft-FtPinG0000990500.01.T01	Os-LOC_Os09g31210.1.MSUv7.0	9e-121
120- 3:	Ft-FtPinG0003274700.01.T01	Os-LOC_Os09g31300.1.MSUv7.0	1e-43
120- 4:	Ft-FtPinG0003275300.01.T01	Os-LOC_Os09g31360.1.MSUv7.0	6e-141
120- 5:	Ft-FtPinG0003276900.01.T01	Os-LOC_Os09g31370.1.MSUv7.0	3e-134
120- 6:	Ft-FtPinG0003277600.01.T01	Os-LOC_Os09g31400.1.MSUv7.0	8e-13
