# Supplementary material for: Genome-wide identification, subcellular localization, and expression analysis of the phosphatidyl ethanolamine-binding protein family reveals the candidates involved in flowering and yield regulation of Tartary buckwheat (Fagopyrum tataricum)
Source: PeerJ. 2024 Mar 26;12:e17183. doi: 10.7717/peerj.17183 (PMC10979741; doi:10.7717/peerj.17183)
Supplement: Supplemental Information 9 [file peerj-12-17183-s009.xlsx]

## Sheet: Sheet2
	XQ-infl1	XQ-infl2	XQ-infl3	average	SD	KQ-infl1	KQ-infl2	KQ-infl3	average	SD	MQ-infl1	MQ-infl2	MQ-infl3	average	SD
FtFT1	31.2472	39.4846	33.169	34.6336	4.30957	37.1339	45.3448	40.993	41.1572	4.10793	0	0.700727	0.268926	0.323218	0.353504
FtFT3	4.92915	9.92962	7.04928	7.30269	2.50985	2.48765	1.15522	2.2188	1.95389	0.704608	0.85817	0.784717	0.509	0.717296	0.18409
FtFT4	2.538	1.625	2.332	2.165	0.478862	0	0.164	0	0.0546667	0.0946854	0	0	0.244	0.0813333	0.140873
FtFT7	2.996	4.034	4.576	3.86867	0.802871	6.772	5.211	7.258	6.41367	1.06951	5.951	3.883	4.933	4.92233	1.03404
FtTFL1	7.72542	7.096	8.381	7.73414	0.642544	5.286	9.793	6.977	7.352	2.27678	6.481	3.73	9.186	6.46567	2.72803
	XQ-leaf1	XQ-leaf2	XQ-leaf3	average	SD	KQ-leaf1	KQ-leaf2	KQ-leaf3	average	SD	MQ-leaf1	MQ-leaf2	MQ-leaf3	average	SD
FtFT1	56.7418	53.8436	55.445	55.3435	1.45181	19.2086	10.3921	14.691	14.7639	4.4087	0	0	0	0	0
FtFT3	18.3168	29.4014	23.763	23.8271	5.54254	52.4355	84.216	69.302	68.6512	15.9002	11.243	14.083	13.292	12.8727	1.4657
FtFT4	1.665	1.432	1.403	1.5	0.143628	0.783	0.473	0.592	0.616	0.156387	0.161	0.107	0.192	0.153333	0.0430155
FtFT7	0.722	1.244	1.002	0.989333	0.26123	0.762	0.902	0.816	0.826667	0.0706069	0	0.08	0.295	0.125	0.152561
FtTFL1	1.957	1.066	2.571	1.86467	0.756737	2.366	1.247	2.762	2.125	0.785727	2.82	1.831	1.859	2.17	0.563091
